# Supplementary material
Source: PubMed Central journal article supplement (PMC4227561)
Supplement: pr500329w_si_001.pdf [file pr500329w_si_001.pdf]

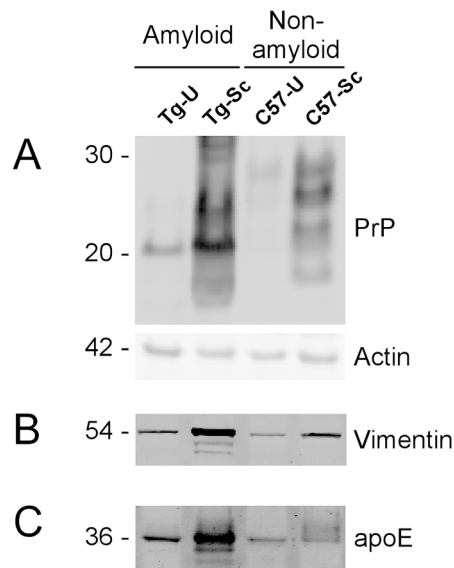

**Supplemental Figure 1.** Western blot analysis of the changes in relative abundance of selected proteins. Changes in the relative amounts of (A) PrP, (B) vimentin and (C) apoE were confirmed by immunoblot analysis. Equivalent concentrations of brain homogenates (2.5% w/v) from each sample group analyzed in the absence of proteinase K were prepared as described and subjected to SDS-PAGE. Tg-U = uninfected Tg44 mice; Tg-Sc = RML infected Tg44 mice; C57-U = uninfected C57BL/10 mice; C57-Sc = RML infected C57BL/10 mice. The PrP and actin were analyzed from the same blot using an Odyssey fluorescence scanner (Li-Cor) and simultaneously scanning the 800nm channel for PrP and the 680nm channel for actin. Molecular weights are shown to the left.

83x95mm (600 x 600 DPI)
