# Supplementary material
Source: PubMed Central journal article supplement (PMC4227561)
Supplement: pr500329w_si_002.pdf [file pr500329w_si_002.pdf]

| ID <sup>a</sup> | Protein                                                            | Total Score <sup>b</sup> | Total Unique Peptides <sup>c</sup> | Total SpC <sup>d</sup> | Amyloid (Tg44) Rank <sup>e</sup> | Amyloid (Tg44) p-value | Amyloid (Tg44) Δ-fold | Amyloid (Tg-Sc) total SpC <sup>f</sup> | Amyloid Tg-Sc mouse1 SpC | Amyloid Tg-Sc mouse2 SpC | Amyloid Tg-Sc mouse3 SpC | Amyloid Tg-Sc mouse4 SpC | Tg-U total SpC <sup>g</sup> | Tg-U mouse1 SpC | Tg-U mouse2 SpC | Tg-U mouse3 SpC | Tg-U mouse4 SpC <sup>h</sup> |
|-----------------|--------------------------------------------------------------------|--------------------------|------------------------------------|------------------------|----------------------------------|------------------------|-----------------------|----------------------------------------|--------------------------|--------------------------|--------------------------|--------------------------|-----------------------------|-----------------|-----------------|-----------------|------------------------------|
| P04925          | Major prion protein                                                | 1053                     | 12                                 | 1569                   | 36                               | 0.0006                 | 90.97                 | 1520                                   | 312.60                   | 262.52                   | 595.87                   | 348.96                   | 17                          | 7.88            | 2.87            | 3.74            | 2.22                         |
| Q8VCM7          | Fibrinogen gamma chain                                             | 405                      | 7                                  | 84                     | 193                              | 0.0192                 | 65.88                 | 63                                     | 11.01                    | 14.30                    | 2.22                     | 35.52                    | 1                           | 0.00            | 0.96            | 0.00            | 0.00                         |
| P51910          | Apolipoprotein D                                                   | 250                      | 4                                  | 59                     | 55                               | 0.0023                 | 56.23                 | 56                                     | 19.81                    | 6.50                     | 21.04                    | 8.88                     | 0                           | 0.00            | 0.00            | 0.00            | 0.00                         |
| O35639          | Annexin A3                                                         | 461                      | 8                                  | 58                     | 15                               | 0.0011                 | 49.45                 | 49                                     | 6.60                     | 16.89                    | 9.97                     | 15.98                    | 0                           | 0.00            | 0.00            | 0.00            | 0.00                         |
| P07356          | Annexin A2                                                         | 540                      | 8                                  | 51                     | 14                               | 0.0005                 | 42.66                 | 43                                     | 6.60                     | 13.00                    | 13.29                    | 9.77                     | 0                           | 0.00            | 0.00            | 0.00            | 0.00                         |
| Q8K0E8          | Fibrinogen beta chain                                              | 408                      | 7                                  | 29                     | 282                              | 0.0239                 | 29.99                 | 30                                     | 4.40                     | 15.60                    | 1.11                     | 8.88                     | 0                           | 0.00            | 0.00            | 0.00            | 0.00                         |
| P13634          | Carbonic anhydrase 1                                               | 279                      | 4                                  | 49                     | 534                              | 0.1502                 | 27.56                 | 20                                     | 13.21                    | 3.90                     | 3.32                     | 0.00                     | 1                           | 0.00            | 0.00            | 0.00            | 0.74                         |
| Q07797          | Galectin-3-binding protein                                         | 341                      | 5                                  | 22                     | 108                              | 0.0062                 | 23.59                 | 24                                     | 2.20                     | 5.20                     | 5.54                     | 10.66                    | 0                           | 0.00            | 0.00            | 0.00            | 0.00                         |
| Q91X72          | Hemopexin                                                          | 501                      | 8                                  | 94                     | 2                                | 0.0056                 | 23.08                 | 66                                     | 8.81                     | 22.09                    | 9.97                     | 24.86                    | 3                           | 0.00            | 1.91            | 0.93            | 0.00                         |
| Q61233          | Plastin-2                                                          | 382                      | 7                                  | 19                     | 16                               | 0.0024                 | 20.40                 | 20                                     | 4.40                     | 7.80                     | 5.54                     | 2.66                     | 0                           | 0.00            | 0.00            | 0.00            | 0.00                         |
| Q61646          | Haptoglobin                                                        | 287                      | 4                                  | 16                     | 307                              | 0.0671                 | 17.75                 | 18                                     | 0.00                     | 9.10                     | 3.32                     | 5.33                     | 0                           | 0.00            | 0.00            | 0.00            | 0.00                         |
| Q02105          | Complement C1q subcomponent subunit C                              | 168                      | 3                                  | 49                     | 8                                | 0.0022                 | 17.66                 | 35                                     | 11.01                    | 7.80                     | 8.86                     | 7.10                     | 2                           | 1.97            | 0.00            | 0.00            | 0.00                         |
| P08032          | Spectrin alpha chain, erythrocyte                                  | 527                      | 9                                  | 36                     | 280                              | 0.0191                 | 16.48                 | 16                                     | 8.81                     | 3.90                     | 1.11                     | 2.66                     | 0                           | 0.00            | 0.00            | 0.00            | 0.00                         |
| P01029          | Complement C4-B                                                    | 223                      | 4                                  | 17                     | 141                              | 0.0591                 | 16.26                 | 16                                     | 0.00                     | 6.50                     | 4.43                     | 5.33                     | 0                           | 0.00            | 0.00            | 0.00            | 0.00                         |
| Q8R1B4          | Eukaryotic translation initiation factor 3 subunit C               | 223                      | 3                                  | 33                     | 110                              | 0.0054                 | 15.23                 | 15                                     | 2.20                     | 2.60                     | 3.32                     | 7.10                     | 0                           | 0.00            | 0.00            | 0.00            | 0.00                         |
| P09055          | Integrin beta-1                                                    | 179                      | 3                                  | 18                     | 117                              | 0.0118                 | 15.16                 | 15                                     | 6.60                     | 3.90                     | 1.11                     | 3.55                     | 0                           | 0.00            | 0.00            | 0.00            | 0.00                         |
| Q91V17          | Ribonuclease inhibitor                                             | 314                      | 5                                  | 13                     | 580                              | 0.1853                 | 14.13                 | 14                                     | 8.81                     | 0.00                     | 0.00                     | 5.33                     | 0                           | 0.00            | 0.00            | 0.00            | 0.00                         |
| P29699          | Alpha-2-HS-glycoprotein                                            | 337                      | 5                                  | 45                     | 20                               | 0.0039                 | 13.65                 | 26                                     | 6.60                     | 9.10                     | 3.32                     | 7.10                     | 2                           | 0.00            | 1.91            | 0.00            | 0.00                         |
| Q61147          | Ceruloplasmin                                                      | 234                      | 4                                  | 27                     | 121                              | 0.0121                 | 12.95                 | 13                                     | 2.20                     | 5.20                     | 1.11                     | 4.44                     | 0                           | 0.00            | 0.00            | 0.00            | 0.00                         |
| P01027          | Complement C3                                                      | 644                      | 10                                 | 34                     | 148                              | 0.0615                 | 12.75                 | 37                                     | 15.41                    | 14.30                    | 1.11                     | 6.22                     | 3                           | 1.97            | 0.00            | 0.93            | 0.00                         |
| P20152          | Vimentin                                                           | 1409                     | 20                                 | 848                    | 66                               | 0.0085                 | 11.87                 | 685                                    | 180.52                   | 150.75                   | 170.57                   | 182.92                   | 58                          | 21.66           | 16.27           | 16.82           | 2.97                         |
| Q8VHX6          | Filamin-C                                                          | 268                      | 5                                  | 16                     | 285                              | 0.0203                 | 11.58                 | 12                                     | 2.20                     | 6.50                     | 1.11                     | 1.78                     | 0                           | 0.00            | 0.00            | 0.00            | 0.00                         |
| Q9DCL9          | Multifunctional protein ADE2                                       | 168                      | 3                                  | 23                     | 18                               | 0.0017                 | 11.34                 | 11                                     | 2.20                     | 1.30                     | 4.43                     | 2.66                     | 1                           | 0.00            | 0.00            | 0.93            | 0.00                         |
| Q61768          | Kinesin-1 heavy chain                                              | 189                      | 3                                  | 17                     | 122                              | 0.0114                 | 11.19                 | 11                                     | 4.40                     | 3.90                     | 1.11                     | 1.78                     | 0                           | 0.00            | 0.00            | 0.00            | 0.00                         |
| Q3TEA8          | Heterochromatin protein 1-binding protein 3                        | 177                      | 3                                  | 28                     | 25                               | 0.0185                 | 11.02                 | 21                                     | 8.81                     | 5.20                     | 4.43                     | 2.66                     | 2                           | 0.00            | 1.91            | 0.00            | 0.00                         |
| Q8BY89          | Choline transporter-like protein 2                                 | 200                      | 3                                  | 16                     | 146                              | 0.0580                 | 10.77                 | 11                                     | 0.00                     | 3.90                     | 3.32                     | 3.55                     | 0                           | 0.00            | 0.00            | 0.00            | 0.00                         |
| P51660          | Peroxisomal multifunctional enzyme type 2                          | 520                      | 8                                  | 48                     | 193                              | 0.1507                 | 10.74                 | 31                                     | 11.01                    | 10.40                    | 0.00                     | 9.77                     | 3                           | 1.97            | 0.00            | 0.93            | 0.00                         |
| P17809          | Solute carrier family 2, facilitated glucose transporter member 1  | 132                      | 2                                  | 42                     | 164                              | 0.0810                 | 10.56                 | 33                                     | 11.01                    | 11.70                    | 8.86                     | 1.78                     | 3                           | 0.00            | 0.00            | 0.93            | 2.22                         |
| Q8C854          | Myelin expression factor 2                                         | 166                      | 3                                  | 17                     | 816                              | 0.1661                 | 10.11                 | 9                                      | 0.00                     | 3.90                     | 1.11                     | 4.44                     | 1                           | 0.00            | 0.00            | 0.93            | 0.00                         |
| Q8C7X2          | Uncharacterized protein KIAA0090                                   | 176                      | 3                                  | 6                      | 1176                             | 0.3696                 | 10.11                 | 7                                      | 6.60                     | 0.00                     | 0.00                     | 0.89                     | 1                           | 0.00            | 0.00            | 0.00            | 0.74                         |
| P07759          | Serine protease inhibitor A3K                                      | 130                      | 2                                  | 26                     | 29                               | 0.0287                 | 10.00                 | 19                                     | 4.40                     | 5.20                     | 2.22                     | 7.10                     | 2                           | 0.00            | 0.96            | 0.93            | 0.00                         |
| Q8K411          | Presequence protease, mitochondrial                                | 179                      | 3                                  | 10                     | 477                              | 0.0625                 | 9.67                  | 10                                     | 4.40                     | 2.60                     | 0.00                     | 2.66                     | 0                           | 0.00            | 0.00            | 0.00            | 0.00                         |
| P26040          | Ezrin                                                              | 279                      | 4                                  | 42                     | 124                              | 0.0111                 | 9.58                  | 28                                     | 6.60                     | 13.00                    | 2.22                     | 6.22                     | 3                           | 1.97            | 0.96            | 0.00            | 0.00                         |
| P98086          | Complement C1q subcomponent subunit A                              | 208                      | 3                                  | 91                     | 7                                | 0.0190                 | 9.37                  | 55                                     | 15.41                    | 9.10                     | 21.04                    | 9.77                     | 6                           | 5.91            | 0.00            | 0.00            | 0.00                         |
| Q8K010          | 5-oxoprolinase                                                     | 540                      | 9                                  | 79                     | 24                               | 0.0108                 | 9.35                  | 36                                     | 8.81                     | 9.10                     | 6.65                     | 11.54                    | 4                           | 1.97            | 0.96            | 0.93            | 0.00                         |
| Q35874          | Neutral amino acid transporter A                                   | 253                      | 4                                  | 86                     | 3                                | 0.0048                 | 9.23                  | 69                                     | 19.81                    | 19.49                    | 12.18                    | 17.76                    | 8                           | 3.94            | 0.96            | 1.87            | 0.74                         |
| Q06138          | Calcium-binding protein 39                                         | 156                      | 3                                  | 21                     | 872                              | 0.2019                 | 9.21                  | 7                                      | 2.20                     | 1.30                     | 3.32                     | 0.00                     | 1                           | 0.00            | 0.00            | 0.00            | 0.74                         |
| Q9EPK7          | Exportin-7                                                         | 228                      | 4                                  | 29                     | 421                              | 0.0077                 | 8.98                  | 9                                      | 2.20                     | 3.90                     | 1.11                     | 1.78                     | 0                           | 0.00            | 0.00            | 0.00            | 0.00                         |
| Q9WVA4          | Transgelin-2                                                       | 279                      | 5                                  | 32                     | 324                              | 0.0757                 | 8.94                  | 26                                     | 13.21                    | 5.20                     | 7.75                     | 0.00                     | 3                           | 1.97            | 0.96            | 0.00            | 0.00                         |
| P28650          | Adenylosuccinate synthetase isozyme 1                              | 197                      | 3                                  | 36                     | 19                               | 0.0248                 | 8.90                  | 26                                     | 6.60                     | 5.20                     | 6.65                     | 7.10                     | 3                           | 0.00            | 2.87            | 0.00            | 0.00                         |
| Q3UHD6          | Sorting nexin-27                                                   | 260                      | 4                                  | 29                     | 937                              | 0.0897                 | 8.88                  | 8                                      | 0.00                     | 6.50                     | 1.11                     | 0.89                     | 1                           | 0.00            | 0.96            | 0.00            | 0.00                         |
| Q99KC8          | von Willebrand factor A domain-containing protein 5A               | 181                      | 3                                  | 10                     | 487                              | 0.0623                 | 8.78                  | 9                                      | 0.00                     | 3.90                     | 2.22                     | 2.66                     | 0                           | 0.00            | 0.00            | 0.00            | 0.00                         |
| P43406          | Integrin alpha-V                                                   | 238                      | 4                                  | 8                      | 1035                             | 0.1820                 | 8.30                  | 8                                      | 4.40                     | 3.90                     | 0.00                     | 0.00                     | 0                           | 0.00            | 0.00            | 0.00            | 0.00                         |
| Q64288          | Olfactory marker protein                                           | 534                      | 9                                  | 152                    | 954                              | 0.1015                 | 8.29                  | 8                                      | 2.20                     | 5.20                     | 0.00                     | 0.89                     | 0                           | 0.00            | 0.00            | 0.00            | 0.00                         |
| P14685          | 26S proteasome non-ATPase regulatory subunit 3                     | 183                      | 3                                  | 10                     | 247                              | 0.0107                 | 8.26                  | 8                                      | 2.20                     | 2.60                     | 2.22                     | 0.89                     | 1                           | 0.00            | 0.96            | 0.00            | 0.00                         |
| Q06890          | Clusterin                                                          | 358                      | 6                                  | 72                     | 3                                | 0.0350                 | 8.19                  | 55                                     | 15.41                    | 9.10                     | 16.61                    | 14.21                    | 7                           | 1.97            | 4.78            | 0.00            | 0.00                         |
| P61290          | Proteasome activator complex subunit 3                             | 154                      | 3                                  | 10                     | 1247                             | 0.4305                 | 8.06                  | 8                                      | 6.60                     | 0.00                     | 1.11                     | 0.00                     | 1                           | 0.00            | 0.96            | 0.00            | 0.00                         |
| P24270          | Catalase                                                           | 282                      | 4                                  | 21                     | 237                              | 0.0060                 | 8.03                  | 8                                      | 2.20                     | 2.60                     | 1.11                     | 1.78                     | 1                           | 0.00            | 0.96            | 0.00            | 0.00                         |
| P03911          | NADH-biquinone oxidoreductase chain 4                              | 218                      | 4                                  | 23                     | 841                              | 0.4888                 | 8.01                  | 22                                     | 2.20                     | 19.49                    | 0.00                     | 0.00                     | 3                           | 1.97            | 0.00            | 0.00            | 0.74                         |
| Q8BMG7          | Rab3 GTPase-activating protein non-catalytic subunit               | 157                      | 3                                  | 14                     | 764                              | 0.0930                 | 7.89                  | 8                                      | 4.40                     | 2.60                     | 0.00                     | 0.89                     | 0                           | 0.00            | 0.00            | 0.00            | 0.00                         |
| Q9CZW4          | Long-chain-fatty-acid-CoA ligase 3                                 | 189                      | 3                                  | 8                      | 731                              | 0.0678                 | 7.88                  | 8                                      | 2.20                     | 3.90                     | 0.00                     | 1.78                     | 0                           | 0.00            | 0.00            | 0.00            | 0.00                         |
| P14106          | Complement C1q subcomponent subunit B                              | 324                      | 5                                  | 148                    | 32                               | 0.0237                 | 7.82                  | 88                                     | 19.81                    | 18.19                    | 22.15                    | 27.53                    | 11                          | 5.91            | 3.83            | 0.00            | 1.48                         |
| P55012          | Solute carrier family 12 member 2                                  | 187                      | 3                                  | 14                     | 1038                             | 0.1812                 | 7.80                  | 7                                      | 4.40                     | 0.00                     | 1.11                     | 1.78                     | 1                           | 0.00            | 0.00            | 0.93            | 0.00                         |
| P08226          | Apolipoprotein E                                                   | 723                      | 11                                 | 527                    | 5                                | 0.0021                 | 7.55                  | 433                                    | 129.88                   | 85.77                    | 152.84                   | 64.82                    | 57                          | 15.75           | 18.18           | 13.08           | 10.38                        |
| Q8C167          | Prolyl endopeptidase-like                                          | 192                      | 3                                  | 15                     | 1041                             | 0.1819                 | 7.45                  | 7                                      | 0.00                     | 3.90                     | 0.00                     | 3.55                     | 0                           | 0.00            | 0.00            | 0.00            | 0.00                         |
| P16332          | Methylmalonyl-CoA mutase, mitochondrial                            | 352                      | 5                                  | 29                     | 448                              | 0.1901                 | 7.42                  | 14                                     | 2.20                     | 6.50                     | 0.00                     | 5.33                     | 2                           | 0.00            | 0.96            | 0.93            | 0.00                         |
| P61148          | Heparin-binding growth factor 1                                    | 124                      | 2                                  | 41                     | 47                               | 0.0589                 | 7.38                  | 18                                     | 6.60                     | 5.20                     | 4.43                     | 1.78                     | 2                           | 0.00            | 0.96            | 0.00            | 1.48                         |
| Q5SUR0          | Phosphoribosylformylglycinamide synthase                           | 732                      | 12                                 | 128                    | 6                                | 0.0365                 | 7.08                  | 61                                     | 15.41                    | 13.00                    | 16.61                    | 15.98                    | 9                           | 0.00            | 8.61            | 0.00            | 0.00                         |
| Q5SSL4          | Active breakpoint cluster region-related protein                   | 338                      | 5                                  | 41                     | 640                              | 0.2213                 | 6.85                  | 13                                     | 6.60                     | 6.50                     | 0.00                     | 0.00                     | 2                           | 0.00            | 1.91            | 0.00            | 0.00                         |
| Q69ZK0          | Phosphatidylinositol 3,4,5-trisphosphate-dependent Rac exchanger 1 | 210                      | 4                                  | 17                     | 758                              | 0.0849                 | 6.81                  | 7                                      | 0.00                     | 2.60                     | 3.32                     | 0.89                     | 0                           | 0.00            | 0.00            | 0.00            | 0.00                         |
| Q9Z0J4          | Nitric oxide synthase, brain                                       | 170                      | 3                                  | 14                     | 257                              | 0.0089                 | 6.80                  | 7                                      | 2.20                     | 2.60                     | 1.11                     | 0.89                     | 0                           | 0.00            | 0.00            | 0.00            | 0.00                         |
| P21981          | Protein-glutamine gamma-glutamyltransferase 2                      | 165                      | 3                                  | 10                     | 1204                             | 0.3791                 | 6.58                  | 6                                      | 0.00                     | 2.60                     | 0.00                     | 3.55                     | 1                           | 0.00            | 0.00            | 0.93            | 0.00                         |
| P39054          | Dynamin-2                                                          | 123                      | 2                                  | 5                      | 500                              | 0.0600                 | 6.58                  | 7                                      | 2.20                     | 2.60                     | 0.00                     | 1.78                     | 0                           | 0.00            | 0.00            | 0.00            | 0.00                         |
| Q64737          | Trifunctional purine biosynthetic protein adenosine-3              | 175                      | 3                                  | 44                     | 349                              | 0.0814                 | 6.54                  | 17                                     | 0.00                     | 3.90                     | 4.43                     | 8.88                     | 3                           | 0.00            | 0.96            | 0.93            | 0.74                         |
| Q8QZY1          | Eukaryotic translation initiation factor 3 subunit L               | 168                      | 3                                  | 7                      | 1209                             | 0.3869                 | 6.53                  | 6                                      | 2.20                     | 3.90                     | 0.00                     | 0.00                     | 1                           | 0.00            | 0.00            | 0.93            | 0.00                         |
| P26041          | Moesin                                                             | 354                      | 6                                  | 69                     | 366                              | 0.0918                 | 6.34                  | 36                                     | 6.60                     | 10.40                    | 3.32                     | 15.98                    | 6                           | 1.97            | 0.96            | 2.80            | 0.00                         |
| P97371          | Proteasome activator complex subunit 1                             | 235                      | 3                                  | 37                     | 34                               | 0.0164                 | 6.23                  | 18                                     | 6.60                     | 5.20                     | 1.11                     | 5.33                     | 3                           | 1.97            | 0.96            | 0.00            | 0.00                         |
| Q0KL02          | Triple functional domain protein                                   | 150                      | 3                                  | 9                      | 935                              | 0.2438                 | 6.22                  | 5                                      | 2.20                     | 1.30                     | 1.11                     | 0.00                     | 1                           | 0.00            | 0.00            | 0.00            | 0.74                         |
| Q8VE33          | Ganglioside-induced differentiation-associated protein 1-like 1    | 134                      | 2                                  | 25                     | 154                              | 0.0383                 | 6.16                  | 12                                     | 4.40                     | 1.30                     | 1.11                     | 5.33                     | 2                           | 1.97            | 0.00            | 0.00            | 0.00                         |
| O55029          | Coatamer subunit beta                                              | 254                      | 4                                  | 7                      | 1061                             | 0.1839                 | 6.15                  | 6                                      | 0.00                     | 2.60                     | 0.00                     | 3.55                     | 0                           | 0.00            | 0.00            | 0.00            | 0.00                         |
| P70336          | Rho-associated protein kinase 2                                    | 571                      | 9                                  | 66                     | 330                              | 0.0656                 | 6.09                  | 22                                     | 8.81                     | 9.10                     | 0.00                     | 4.44                     | 4                           | 1.97            | 0.96            | 0.00            | 0.74                         |
| Q9Z1Q9          | Valyl-tRNA synthetase                                              | 694                      | 10                                 | 100                    | 79                               | 0.0083                 | 6.09                  | 51                                     | 19.81                    | 13.00                    | 7.75                     | 10.66                    | 8                           | 1.97            | 3.83            | 1.87            | 0.74                         |
| Q920Q4          | Vacuolar protein sorting-associated protein 16 homolog             | 195                      | 3                                  | 6                      | 1126                             | 0.2481                 | 6.09                  | 6                                      | 0.00                     | 5.20                     | 0.00                     | 0.89                     | 0                           | 0.00            | 0.00            | 0.00            | 0.00                         |
| Q920H4          | CUGBP Elav-like family member 2                                    | 227                      | 3                                  | 43                     | 148                              | 0.0270                 | 6.01                  | 17                                     | 6.60                     | 1.30                     | 3.32                     | 6.22                     | 3                           | 1.97            | 0.00            | 0.93            | 0.00                         |
|                 |                                                                    |                          |                                    |                        |                                  |                        |                       |                                        |                          |                          |                          |                          |                             |                 |                 |                 |                              |

|         |                                                                         |      |    |     |      |        |      |     |       |       |       |       |    |       |       |        |       |
|---------|-------------------------------------------------------------------------|------|----|-----|------|--------|------|-----|-------|-------|-------|-------|----|-------|-------|--------|-------|
| Q78PY7  | Staphylococcal nuclease domain-containing protein 1                     | 541  | 8  | 122 | 30   | 0.0021 | 4.67 | 50  | 6.60  | 13.00 | 12.18 | 17.76 | 11 | 1.97  | 2.87  | 2.80   | 2.97  |
| Q9Z2W0  | Aspartyl aminopeptidase                                                 | 160  | 3  | 7   | 1387 | 0.6486 | 4.60 | 4   | 4.40  | 0.00  | 0.00  | 0.00  | 1  | 0.00  | 0.96  | 0.00   | 0.00  |
| Q9EQZ6  | Rap guanine nucleotide exchange factor 4                                | 142  | 2  | 14  | 602  | 0.1466 | 4.59 | 9   | 4.40  | 1.30  | 1.11  | 1.78  | 2  | 0.00  | 0.00  | 1.87   | 0.00  |
| P08905  | Lysozyme C-2                                                            | 136  | 2  | 31  | 1218 | 0.3685 | 4.58 | 9   | 0.00  | 2.60  | 5.54  | 0.89  | 2  | 1.97  | 0.00  | 0.00   | 0.00  |
| Q9CYL5  | Golgi-associated plant pathogenesis-related protein 1                   | 150  | 2  | 7   | 469  | 0.0142 | 4.57 | 9   | 4.40  | 2.60  | 1.11  | 0.89  | 2  | 1.97  | 0.00  | 0.00   | 0.00  |
| P29758  | Ornithine aminotransferase, mitochondrial                               | 184  | 3  | 21  | 811  | 0.4203 | 4.57 | 11  | 6.60  | 0.00  | 0.00  | 4.44  | 2  | 0.00  | 0.00  | 0.93   | 1.48  |
| Q99K51  | Plastin-3                                                               | 555  | 8  | 91  | 48   | 0.0296 | 4.49 | 30  | 6.60  | 10.40 | 7.75  | 5.33  | 7  | 0.00  | 6.70  | 0.00   | 0.00  |
| Q8QZS1  | 3-hydroxyisobutyryl-CoA hydrolase, mitochondrial                        | 661  | 10 | 97  | 63   | 0.0639 | 4.47 | 43  | 8.81  | 16.89 | 7.75  | 9.77  | 10 | 5.91  | 0.96  | 2.80   | 0.00  |
| Q9CPW4  | Actin-related protein 2/3 complex subunit 5                             | 173  | 3  | 95  | 35   | 0.0460 | 4.47 | 33  | 11.01 | 9.10  | 6.65  | 6.22  | 7  | 1.97  | 0.00  | 4.67   | 0.74  |
| Q00612  | Glucose-6-phosphate 1-dehydrogenase X                                   | 195  | 3  | 18  | 46   | 0.0258 | 4.46 | 18  | 6.60  | 5.20  | 2.22  | 3.55  | 4  | 3.94  | 0.00  | 0.00   | 0.00  |
| Q92111  | Serotransferrin                                                         | 1729 | 26 | 463 | 9    | 0.0287 | 4.46 | 208 | 63.84 | 58.48 | 44.30 | 41.73 | 47 | 13.78 | 27.75 | 3.74   | 1.48  |
| Q9D0R2  | Threonyl-tRNA synthetase, cytoplasmic                                   | 418  | 7  | 64  | 433  | 0.1539 | 4.32 | 21  | 4.40  | 6.50  | 0.00  | 9.77  | 5  | 0.00  | 4.78  | 0.00   | 0.00  |
| P01837  | Ig kappa chain C region                                                 | 121  | 2  | 28  | 274  | 0.1968 | 4.32 | 16  | 6.60  | 0.00  | 3.32  | 6.22  | 4  | 0.00  | 0.00  | 3.74   | 0.00  |
| P26039  | Talin-1                                                                 | 1321 | 19 | 202 | 166  | 0.0463 | 4.28 | 96  | 28.62 | 29.89 | 14.40 | 23.09 | 22 | 1.97  | 4.78  | 11.21  | 4.45  |
| Q91YP2  | Neurolysin, mitochondrial                                               | 184  | 3  | 20  | 882  | 0.1704 | 4.22 | 8   | 0.00  | 3.90  | 2.22  | 1.78  | 2  | 0.00  | 0.00  | 1.87   | 0.00  |
| Q80WQ2  | Protein VAC14 homolog                                                   | 159  | 3  | 6   | 1142 | 0.2407 | 4.22 | 8   | 4.40  | 3.90  | 0.00  | 0.00  | 2  | 1.97  | 0.00  | 0.00   | 0.00  |
| Q63912  | Oligodendrocyte-myelin glycoprotein                                     | 239  | 4  | 43  | 216  | 0.1318 | 4.21 | 28  | 6.60  | 14.30 | 1.11  | 6.22  | 7  | 1.97  | 2.87  | 1.87   | 0.00  |
| Q921E2  | Ras-related protein Rab-31                                              | 142  | 2  | 22  | 182  | 0.0745 | 4.14 | 11  | 4.40  | 2.60  | 3.32  | 0.89  | 3  | 1.97  | 0.00  | 0.00   | 0.74  |
| Q9JLB0  | MAGUK p55 subfamily member 6                                            | 278  | 4  | 36  | 212  | 0.1239 | 4.12 | 14  | 4.40  | 6.50  | 2.22  | 0.89  | 3  | 0.00  | 1.91  | 0.00   | 1.48  |
| Q55YD0  | Myosin-1d                                                               | 440  | 7  | 40  | 485  | 0.1892 | 4.12 | 25  | 13.21 | 5.20  | 1.11  | 5.33  | 6  | 0.00  | 2.87  | 0.93   | 2.22  |
| P17156  | Heat shock-related 70 kDa protein 2                                     | 533  | 9  | 112 | 309  | 0.0098 | 4.10 | 41  | 2.20  | 14.30 | 11.08 | 13.32 | 10 | 0.00  | 3.83  | 4.67   | 1.48  |
| Q9CZD3  | Glycyl-tRNA synthetase                                                  | 602  | 9  | 118 | 37   | 0.0397 | 4.06 | 39  | 11.01 | 11.70 | 7.75  | 8.88  | 10 | 3.94  | 5.74  | 0.00   | 0.00  |
| Q8VED9  | Galectin-related protein A                                              | 169  | 3  | 47  | 460  | 0.1737 | 4.04 | 15  | 8.81  | 1.30  | 3.32  | 1.78  | 4  | 0.00  | 0.96  | 2.80   | 0.00  |
| Q501J6  | Probable ATP-dependent RNA helicase DDX17                               | 127  | 2  | 10  | 602  | 0.1354 | 4.03 | 8   | 2.20  | 1.30  | 3.32  | 0.89  | 2  | 0.00  | 1.91  | 0.00   | 0.00  |
| Q8R146  | Acylamino-acid-releasing enzyme                                         | 529  | 8  | 54  | 184  | 0.0752 | 4.01 | 23  | 2.20  | 10.40 | 4.43  | 6.22  | 6  | 1.97  | 3.83  | 0.00   | 0.00  |
| Q9D710  | Thioredoxin-related transmembrane protein 2                             | 211  | 4  | 9   | 892  | 0.1788 | 4.00 | 8   | 2.20  | 3.90  | 0.00  | 1.78  | 2  | 1.97  | 0.00  | 0.00   | 0.00  |
| O88685  | 26S protease regulatory subunit 6A                                      | 208  | 4  | 22  | 1091 | 0.1831 | 3.99 | 4   | 0.00  | 0.00  | 2.22  | 1.78  | 0  | 0.00  | 0.00  | 0.00   | 0.00  |
| Q8BH66  | Atlastin-1                                                              | 386  | 5  | 36  | 311  | 0.0102 | 3.98 | 18  | 6.60  | 7.80  | 2.22  | 1.78  | 5  | 1.97  | 1.91  | 0.00   | 0.74  |
| P34914  | Epoxide hydrolase 2                                                     | 126  | 2  | 5   | 1111 | 0.1965 | 3.96 | 4   | 0.00  | 1.30  | 0.00  | 2.66  | 0  | 0.00  | 0.00  | 0.00   | 0.00  |
| Q8R5H6  | Wiskott-Aldrich syndrome protein family member 1                        | 121  | 2  | 29  | 536  | 0.2477 | 3.96 | 11  | 0.00  | 1.30  | 5.54  | 4.44  | 3  | 0.00  | 1.91  | 0.93   | 0.00  |
| Q99LP6  | GrpE protein homolog 1, mitochondrial                                   | 133  | 2  | 19  | 321  | 0.0681 | 3.94 | 7   | 2.20  | 1.30  | 2.22  | 0.89  | 2  | 0.00  | 0.00  | 0.93   | 0.74  |
| Q8CG76  | Aflatoxin B1 aldehyde reductase member 2                                | 205  | 3  | 32  | 1094 | 0.1819 | 3.74 | 6   | 0.00  | 0.00  | 1.11  | 4.44  | 1  | 0.00  | 0.00  | 0.00   | 1.48  |
| P50544  | Very long-chain specific acyl-CoA dehydrogenase, mitochondrial          | 872  | 13 | 138 | 96   | 0.1065 | 3.72 | 67  | 19.81 | 19.49 | 9.97  | 17.76 | 18 | 0.00  | 10.53 | 7.48   | 0.00  |
| Q9Z1Q5  | Chloride intracellular channel protein 1                                | 248  | 4  | 47  | 59   | 0.0292 | 3.68 | 25  | 6.60  | 5.20  | 7.75  | 5.33  | 7  | 3.94  | 0.96  | 1.87   | 0.00  |
| P21460  | Cystatin-C                                                              | 474  | 8  | 276 | 106  | 0.1367 | 3.67 | 108 | 22.01 | 36.39 | 37.66 | 11.54 | 29 | 19.69 | 0.00  | 3.74   | 5.93  |
| P62500  | TSC22 domain family protein 1                                           | 134  | 2  | 17  | 393  | 0.0794 | 3.66 | 11  | 4.40  | 5.20  | 1.11  | 0.00  | 3  | 1.97  | 0.96  | 0.00   | 0.00  |
| Q9CQC9  | GTP-binding protein SAR1b                                               | 122  | 2  | 10  | 1210 | 0.3221 | 3.66 | 4   | 2.20  | 1.30  | 0.00  | 0.00  | 1  | 0.00  | 0.96  | 0.00   | 0.00  |
| Q8BH04  | Phosphoenolpyruvate carboxykinase [GTP], mitochondrial                  | 241  | 4  | 12  | 400  | 0.0853 | 3.59 | 10  | 4.40  | 5.20  | 0.00  | 0.89  | 3  | 1.97  | 0.96  | 0.00   | 0.00  |
| Q62351  | Transferrin receptor protein 1                                          | 213  | 4  | 11  | 1341 | 0.5102 | 3.57 | 7   | 0.00  | 2.60  | 0.00  | 4.44  | 2  | 1.97  | 0.00  | 0.00   | 0.00  |
| Q91Z31  | Polypyrimidine tract-binding protein 2                                  | 290  | 4  | 23  | 654  | 0.1879 | 3.57 | 13  | 0.00  | 10.40 | 2.22  | 0.89  | 4  | 0.00  | 1.91  | 1.87   | 0.00  |
| Q61001  | Laminin subunit alpha-5                                                 | 396  | 7  | 32  | 423  | 0.1118 | 3.57 | 15  | 8.81  | 2.60  | 0.00  | 3.55  | 4  | 1.97  | 0.00  | 0.00   | 2.22  |
| P23953  | Liver carboxylesterase N                                                | 197  | 3  | 6   | 1124 | 0.1903 | 3.50 | 4   | 2.20  | 1.30  | 0.00  | 0.00  | 0  | 0.00  | 0.00  | 0.00   | 0.00  |
| Q9Z255  | Ubiquitin-conjugating enzyme E2 A                                       | 115  | 2  | 7   | 1145 | 0.2158 | 3.49 | 3   | 0.00  | 2.60  | 0.00  | 0.89  | 0  | 0.00  | 0.00  | 0.00   | 0.00  |
| O35544  | Excitatory amino acid transporter 4                                     | 165  | 3  | 32  | 201  | 0.0789 | 3.46 | 22  | 0.00  | 10.40 | 6.65  | 5.33  | 6  | 0.00  | 4.78  | 0.93   | 0.74  |
| Q8VDJ3  | Vigilin                                                                 | 293  | 5  | 27  | 221  | 0.1126 | 3.46 | 10  | 2.20  | 2.60  | 4.43  | 0.89  | 3  | 1.97  | 0.96  | 0.00   | 0.00  |
| Q05512  | Serine/threonine-protein kinase MARK2                                   | 158  | 2  | 19  | 519  | 0.2042 | 3.45 | 13  | 0.00  | 2.60  | 6.65  | 3.55  | 4  | 0.00  | 0.00  | 0.00   | 3.71  |
| Q6PHS9  | Voltage-dependent calcium channel subunit alpha-2/delta-2               | 501  | 8  | 81  | 53   | 0.0599 | 3.44 | 36  | 8.81  | 9.10  | 8.86  | 8.88  | 10 | 1.97  | 7.65  | 0.00   | 0.74  |
| Q922D8  | C-1-tetrahydrofolate synthase, cytoplasmic                              | 634  | 10 | 89  | 54   | 0.0135 | 3.43 | 42  | 13.21 | 13.00 | 6.65  | 8.88  | 12 | 3.94  | 1.91  | 1.87   | 4.45  |
| Q99NB9  | Splicing factor 3B subunit 1                                            | 501  | 9  | 46  | 632  | 0.3597 | 3.42 | 13  | 0.00  | 3.90  | 6.65  | 2.66  | 4  | 1.97  | 0.96  | 0.93   | 0.00  |
| Q60854  | Serpin B6                                                               | 185  | 3  | 22  | 70   | 0.0919 | 3.41 | 13  | 4.40  | 2.60  | 3.32  | 2.66  | 4  | 0.00  | 2.87  | 0.93   | 0.00  |
| Q71TMB8 | Cytoplasmic FMR1-interacting protein 1                                  | 474  | 7  | 80  | 462  | 0.1541 | 3.40 | 28  | 11.01 | 10.40 | 2.22  | 4.44  | 8  | 0.00  | 2.87  | 0.93   | 4.45  |
| Q61656  | Probable ATP-dependent RNA helicase DDX5                                | 355  | 6  | 99  | 387  | 0.0667 | 3.40 | 38  | 6.60  | 7.80  | 11.08 | 12.43 | 11 | 0.00  | 5.74  | 4.67   | 0.74  |
| Q01405  | Protein transport protein Sec23A                                        | 455  | 7  | 48  | 49   | 0.0487 | 3.38 | 25  | 6.60  | 7.80  | 4.43  | 6.22  | 7  | 0.00  | 5.74  | 0.93   | 0.74  |
| Q6WVG3  | BTB/POZ domain-containing protein KCTD12                                | 367  | 6  | 59  | 85   | 0.0773 | 3.37 | 29  | 8.81  | 7.80  | 8.86  | 3.55  | 9  | 7.88  | 0.00  | 0.00   | 0.74  |
| P02089  | Hemoglobin subunit beta-2                                               | 200  | 3  | 318 | 331  | 0.2756 | 3.36 | 127 | 46.23 | 31.19 | 46.52 | 3.55  | 38 | 1.97  | 0.00  | 19.63  | 16.31 |
| Q9QYF1  | Retinol dehydrogenase 11                                                | 140  | 2  | 18  | 787  | 0.3333 | 3.36 | 8   | 2.20  | 2.60  | 3.32  | 0.00  | 2  | 0.00  | 0.00  | 0.93   | 1.48  |
| Q9DCS3  | Trans-2-enoyl-CoA reductase, mitochondrial                              | 259  | 4  | 46  | 364  | 0.0392 | 3.35 | 17  | 6.60  | 3.90  | 2.22  | 4.44  | 5  | 1.97  | 0.00  | 0.93   | 2.22  |
| Q92511  | ATPase family AAA domain-containing protein 3                           | 173  | 3  | 15  | 652  | 0.1659 | 3.34 | 7   | 2.20  | 2.60  | 0.00  | 1.78  | 2  | 1.97  | 0.00  | 0.00   | 0.00  |
| Q8K2T1  | NmrA-like family domain-containing protein 1                            | 201  | 3  | 20  | 652  | 0.1659 | 3.34 | 7   | 2.20  | 2.60  | 0.00  | 1.78  | 2  | 1.97  | 0.00  | 0.00   | 0.00  |
| Q64727  | Vinculin                                                                | 1609 | 24 | 228 | 233  | 0.1194 | 3.32 | 91  | 33.02 | 32.49 | 7.75  | 17.76 | 27 | 1.97  | 10.53 | 7.48   | 7.41  |
| Q61137  | Astrotactin-1                                                           | 242  | 4  | 21  | 588  | 0.0874 | 3.30 | 9   | 2.20  | 3.90  | 0.00  | 2.66  | 3  | 0.00  | 1.91  | 0.00   | 0.74  |
| P47791  | Glutathione reductase, mitochondrial                                    | 179  | 3  | 27  | 376  | 0.0916 | 3.30 | 9   | 2.20  | 2.60  | 1.11  | 3.55  | 3  | 0.00  | 2.87  | 0.00   | 0.00  |
| Q9CQF9  | Prenylcytosteine oxidase                                                | 185  | 3  | 21  | 378  | 0.0522 | 3.29 | 12  | 2.20  | 5.20  | 1.11  | 3.55  | 4  | 1.97  | 0.96  | 0.00   | 0.74  |
| Q9CWJ9  | Bifunctional purine biosynthesis protein PURH                           | 999  | 15 | 172 | 223  | 0.0989 | 3.27 | 69  | 22.01 | 28.59 | 6.65  | 11.54 | 21 | 5.91  | 8.61  | 6.54   | 0.00  |
| Q08642  | Protein-arginine deiminase type-2                                       | 352  | 6  | 28  | 946  | 0.5071 | 3.25 | 12  | 0.00  | 7.80  | 1.11  | 3.55  | 4  | 1.97  | 0.00  | 1.87   | 0.00  |
| Q99MN1  | Lysyl-tRNA synthetase                                                   | 179  | 3  | 12  | 1367 | 0.5281 | 3.24 | 3   | 0.00  | 0.00  | 2.22  | 0.89  | 1  | 0.00  | 0.96  | 0.00   | 0.00  |
| P13707  | Glycerol-3-phosphate dehydrogenase [NAD+], cytoplasmic                  | 694  | 11 | 255 | 82   | 0.0655 | 3.20 | 89  | 22.01 | 22.09 | 18.83 | 25.75 | 28 | 5.91  | 0.96  | 14.95  | 5.93  |
| Q9D1A2  | Cytosolic non-specific dipeptidase                                      | 507  | 8  | 100 | 189  | 0.0490 | 3.15 | 45  | 11.01 | 13.00 | 12.18 | 8.88  | 14 | 3.94  | 4.78  | 5.61   | 0.00  |
| Q9DAW9  | Calponin-3                                                              | 108  | 2  | 8   | 861  | 0.3932 | 3.14 | 6   | 0.00  | 1.30  | 2.22  | 2.66  | 2  | 1.97  | 0.00  | 0.00   | 0.00  |
| Q91VM9  | Inorganic pyrophosphatase 2, mitochondrial                              | 373  | 6  | 69  | 474  | 0.1507 | 3.09 | 22  | 4.40  | 9.10  | 2.22  | 6.22  | 7  | 3.94  | 0.00  | 0.93   | 2.22  |
| P45952  | Medium-chain specific acyl-CoA dehydrogenase, mitochondrial             | 136  | 2  | 6   | 1156 | 0.2080 | 3.09 | 3   | 2.20  | 0.00  | 0.00  | 0.89  | 0  | 0.00  | 0.00  | 0.00   | 0.00  |
| Q921G7  | Electron transfer flavoprotein-ubiquinone oxidoreductase, mitochondrial | 383  | 6  | 53  | 716  | 0.4381 | 3.08 | 26  | 11.01 | 10.40 | 0.00  | 4.44  | 8  | 1.97  | 2.87  | 2.80   | 0.74  |
| Q9Z110  | Delta-1-pyrroline-5-carboxylate synthase                                | 173  | 3  | 6   | 1137 | 0.1850 | 3.08 | 3   | 0.00  | 1.30  | 0.00  | 1.78  | 0  | 0.00  | 0.00  | 0.00   | 0.00  |
| Q8BKC5  | Importin-5                                                              | 1174 | 19 | 208 | 367  | 0.2926 | 3.07 | 66  | 26.42 | 23.39 | 3.32  | 12.43 | 21 | 0.00  | 5.74  | 7.48   | 8.15  |
| Q64133  | Amine oxidase [flavin-containing] A                                     | 143  | 2  | 16  | 1353 | 0.4940 | 3.06 | 8   | 0.00  | 5.20  | 2.22  | 0.89  | 3  | 1.97  | 0.00  | 0.00</ |       |

|        |                                                                   |      |    |     |      |        |      |     |       |       |       |        |     |       |       |       |       |
|--------|-------------------------------------------------------------------|------|----|-----|------|--------|------|-----|-------|-------|-------|--------|-----|-------|-------|-------|-------|
| P37040 | NADPH-cytochrome P450 reductase                                   | 231  | 4  | 13  | 437  | 0.1318 | 2.71 | 9   | 2.20  | 2.60  | 1.11  | 2.66   | 3   | 0.00  | 0.00  | 0.93  | 2.22  |
| Q8CGC7 | Bifunctional aminoacyl-tRNA synthetase                            | 765  | 13 | 97  | 272  | 0.1270 | 2.71 | 32  | 4.40  | 10.40 | 3.32  | 14.21  | 12  | 5.91  | 2.87  | 0.93  | 2.22  |
| Q91WQ3 | Tyrosyl-tRNA synthetase, cytoplasmic                              | 375  | 6  | 51  | 282  | 0.1427 | 2.70 | 21  | 6.60  | 6.50  | 2.22  | 5.33   | 8   | 1.97  | 2.87  | 2.80  | 0.00  |
| P08003 | Protein disulfide-isomerase A4                                    | 464  | 7  | 67  | 94   | 0.0527 | 2.68 | 27  | 8.81  | 7.80  | 5.54  | 5.33   | 10  | 5.91  | 2.87  | 0.00  | 1.48  |
| O54865 | Guanylate cyclase soluble subunit beta-1                          | 251  | 4  | 18  | 1180 | 0.4284 | 2.67 | 10  | 2.20  | 6.50  | 0.00  | 0.89   | 4   | 0.00  | 1.91  | 0.93  | 0.74  |
| P52196 | Thiosulfate sulfurtransferase                                     | 458  | 7  | 218 | 254  | 0.0962 | 2.65 | 78  | 24.22 | 9.10  | 23.26 | 21.31  | 29  | 11.81 | 6.70  | 9.35  | 1.48  |
| Q9D4D4 | Transketolase-like protein 2                                      | 161  | 2  | 25  | 953  | 0.1596 | 2.65 | 9   | 2.20  | 2.60  | 1.11  | 3.55   | 4   | 0.00  | 0.96  | 1.87  | 0.74  |
| Q3U0V1 | Far upstream element-binding protein 2                            | 617  | 9  | 155 | 245  | 0.0869 | 2.65 | 67  | 4.40  | 19.49 | 17.72 | 25.75  | 25  | 3.94  | 10.53 | 6.54  | 4.45  |
| Q99JY0 | Trifunctional enzyme subunit beta, mitochondrial                  | 430  | 7  | 106 | 358  | 0.2506 | 2.64 | 48  | 17.61 | 6.50  | 4.43  | 19.53  | 18  | 1.97  | 7.65  | 5.61  | 2.97  |
| Q8BL66 | Early endosome antigen 1                                          | 569  | 9  | 66  | 889  | 0.3971 | 2.64 | 21  | 2.20  | 3.90  | 1.11  | 13.32  | 8   | 5.91  | 0.00  | 1.87  | 0.00  |
| P16045 | Galectin-1                                                        | 207  | 3  | 68  | 610  | 0.2593 | 2.63 | 16  | 2.20  | 9.10  | 3.32  | 0.89   | 6   | 5.91  | 0.00  | 0.00  | 0.00  |
| O08914 | Fatty-acid amide hydrolase 1                                      | 164  | 2  | 22  | 693  | 0.1760 | 2.62 | 13  | 2.20  | 7.80  | 0.00  | 2.66   | 5   | 1.97  | 2.87  | 0.00  | 0.00  |
| P24527 | Leukotriene A-4 hydrolase                                         | 964  | 15 | 197 | 119  | 0.0918 | 2.60 | 66  | 19.81 | 19.49 | 7.75  | 18.65  | 25  | 7.88  | 7.65  | 7.48  | 2.22  |
| Q9CQR6 | Serine/threonine-protein phosphatase 6 catalytic subunit          | 275  | 5  | 35  | 707  | 0.1735 | 2.60 | 9   | 2.20  | 3.90  | 1.11  | 1.78   | 3   | 1.97  | 0.00  | 0.00  | 1.48  |
| Q9DCZ1 | GMP reductase 1                                                   | 214  | 3  | 7   | 1309 | 0.3910 | 2.60 | 3   | 0.00  | 2.60  | 0.00  | 0.00   | 0   | 0.00  | 0.00  | 0.00  | 0.00  |
| Q9EQK5 | Major vault protein                                               | 126  | 2  | 2   | 1309 | 0.3910 | 2.60 | 3   | 0.00  | 2.60  | 0.00  | 0.00   | 0   | 0.00  | 0.00  | 0.00  | 0.00  |
| Q9CZU3 | Superkiller viralicidal activity 2-like 2                         | 167  | 2  | 2   | 1309 | 0.3910 | 2.60 | 3   | 0.00  | 2.60  | 0.00  | 0.00   | 0   | 0.00  | 0.00  | 0.00  | 0.00  |
| Q8K400 | Syntaxin-binding protein 5                                        | 273  | 5  | 23  | 403  | 0.2948 | 2.58 | 11  | 6.60  | 3.90  | 0.00  | 0.89   | 4   | 1.97  | 0.96  | 0.00  | 1.48  |
| Q9CZ30 | Obg-like ATPase 1                                                 | 206  | 3  | 32  | 199  | 0.2525 | 2.58 | 12  | 4.40  | 3.90  | 1.11  | 2.66   | 5   | 0.00  | 0.00  | 4.67  | 0.00  |
| Q9Z1L5 | Voltage-dependent calcium channel subunit alpha-2/delta-3         | 278  | 5  | 25  | 1163 | 0.7475 | 2.58 | 10  | 8.81  | 1.30  | 0.00  | 0.00   | 4   | 0.00  | 0.96  | 0.00  | 2.97  |
| P97390 | Vacuolar protein sorting-associated protein 45                    | 260  | 4  | 26  | 413  | 0.3113 | 2.58 | 12  | 4.40  | 5.20  | 0.00  | 2.66   | 5   | 0.00  | 3.83  | 0.93  | 0.00  |
| Q9WUM4 | Coronin-1C                                                        | 346  | 5  | 56  | 107  | 0.0697 | 2.56 | 28  | 8.81  | 9.10  | 4.43  | 5.33   | 11  | 9.84  | 0.96  | 0.00  | 0.00  |
| Q93092 | Transaldolase                                                     | 473  | 8  | 169 | 261  | 0.0886 | 2.55 | 68  | 17.61 | 18.19 | 13.29 | 18.65  | 27  | 7.88  | 1.91  | 13.08 | 3.71  |
| P18242 | Cathepsin D                                                       | 523  | 8  | 328 | 43   | 0.0320 | 2.54 | 153 | 41.83 | 38.99 | 39.87 | 31.97  | 60  | 23.63 | 7.65  | 10.28 | 18.53 |
| A2ASQ1 | Agrin                                                             | 494  | 8  | 55  | 428  | 0.0536 | 2.54 | 40  | 22.01 | 10.40 | 4.43  | 2.66   | 16  | 11.81 | 0.96  | 2.80  | 0.00  |
| Q99L47 | Hsc70-interacting protein                                         | 422  | 6  | 104 | 113  | 0.0785 | 2.53 | 40  | 13.21 | 6.50  | 9.97  | 10.66  | 16  | 3.94  | 1.91  | 9.35  | 0.74  |
| Q3ULD5 | Methylcrotonoyl-CoA carboxylase beta chain, mitochondrial         | 264  | 4  | 22  | 1295 | 0.3566 | 2.53 | 7   | 2.20  | 5.20  | 0.00  | 0.00   | 3   | 1.97  | 0.96  | 0.00  | 0.00  |
| Q8BHN3 | Neutral alpha-glucosidase AB                                      | 719  | 11 | 167 | 109  | 0.0697 | 2.51 | 57  | 6.60  | 16.89 | 11.08 | 22.20  | 23  | 3.94  | 2.87  | 8.41  | 7.41  |
| Q3U7R1 | Extended synaptotagmin-1                                          | 227  | 4  | 13  | 1003 | 0.5136 | 2.51 | 11  | 6.60  | 3.90  | 0.00  | 0.89   | 5   | 0.00  | 2.87  | 0.93  | 0.74  |
| Q91ZX7 | Prolow-density lipoprotein receptor-related protein 1             | 2948 | 45 | 803 | 13   | 0.0116 | 2.50 | 294 | 59.44 | 64.98 | 68.67 | 101.23 | 118 | 29.53 | 23.92 | 37.38 | 26.69 |
| O35136 | Neural cell adhesion molecule 2                                   | 286  | 4  | 86  | 81   | 0.0144 | 2.47 | 27  | 4.40  | 7.80  | 6.65  | 7.99   | 11  | 1.97  | 4.78  | 1.87  | 2.22  |
| Q9DB41 | Mitochondrial glutamate carrier 2                                 | 142  | 2  | 57  | 145  | 0.1345 | 2.44 | 24  | 6.60  | 3.90  | 4.43  | 8.88   | 10  | 7.88  | 0.00  | 1.87  | 0.00  |
| Q9J91  | Alpha-actinin-2                                                   | 399  | 7  | 32  | 838  | 0.5293 | 2.44 | 19  | 6.60  | 11.70 | 0.00  | 0.89   | 8   | 3.94  | 0.96  | 0.00  | 2.97  |
| Q9Z0X1 | Apoptosis-inducing factor 1, mitochondrial                        | 481  | 7  | 70  | 367  | 0.2289 | 2.41 | 36  | 13.21 | 9.10  | 3.32  | 10.66  | 15  | 3.94  | 2.87  | 7.48  | 0.74  |
| O09131 | Glutathione S-transferase omega-1                                 | 188  | 3  | 63  | 162  | 0.1613 | 2.38 | 18  | 4.40  | 2.60  | 6.65  | 4.44   | 8   | 5.91  | 0.96  | 0.00  | 0.74  |
| P02468 | Laminin subunit gamma-1                                           | 814  | 11 | 121 | 143  | 0.1249 | 2.35 | 50  | 13.21 | 15.60 | 8.86  | 12.43  | 21  | 11.81 | 0.96  | 5.61  | 2.97  |
| Q91ZJ5 | UTP-glucose-1-phosphate uridylyltransferase                       | 495  | 8  | 107 | 541  | 0.1631 | 2.34 | 45  | 15.41 | 14.30 | 4.43  | 10.66  | 19  | 3.94  | 11.48 | 3.74  | 0.00  |
| Q8CIE6 | Coatamer subunit alpha                                            | 501  | 8  | 59  | 648  | 0.2774 | 2.34 | 17  | 6.60  | 7.80  | 1.11  | 1.78   | 7   | 0.00  | 4.78  | 1.87  | 0.74  |
| P06801 | NADP-dependent malic enzyme                                       | 594  | 9  | 149 | 241  | 0.0598 | 2.33 | 58  | 15.41 | 14.30 | 14.40 | 14.21  | 25  | 3.94  | 6.70  | 12.15 | 2.22  |
| Q9CZ44 | NSFL1 cofactor p47                                                | 397  | 6  | 105 | 357  | 0.2140 | 2.33 | 45  | 6.60  | 7.80  | 9.97  | 20.42  | 19  | 13.78 | 0.96  | 3.74  | 0.74  |
| P63158 | High mobility group protein B1                                    | 399  | 6  | 165 | 607  | 0.2135 | 2.33 | 64  | 17.61 | 7.80  | 14.40 | 23.97  | 27  | 7.88  | 14.35 | 0.00  | 5.19  |
| P43276 | Histone H1.5                                                      | 135  | 2  | 35  | 730  | 0.1870 | 2.32 | 15  | 11.01 | 1.30  | 1.11  | 1.78   | 7   | 3.94  | 0.00  | 1.87  | 0.74  |
| Q9CQW2 | ADP-ribosylation factor-like protein 8B                           | 246  | 4  | 105 | 305  | 0.1501 | 2.31 | 40  | 11.01 | 6.50  | 14.40 | 7.99   | 17  | 7.88  | 4.78  | 0.93  | 3.71  |
| Q6P1B1 | Xaa-Pro aminopeptidase 1                                          | 142  | 2  | 20  | 1346 | 0.4129 | 2.31 | 7   | 0.00  | 1.30  | 4.43  | 0.89   | 3   | 0.00  | 2.87  | 0.00  | 0.00  |
| Q9EPL8 | Importin-7                                                        | 658  | 10 | 141 | 340  | 0.1931 | 2.29 | 47  | 15.41 | 19.49 | 4.43  | 7.99   | 21  | 0.00  | 14.35 | 5.61  | 0.74  |
| P35285 | Ras-related protein Rab-22A                                       | 141  | 2  | 42  | 1029 | 0.5173 | 2.28 | 13  | 0.00  | 1.30  | 8.86  | 2.66   | 6   | 0.00  | 1.91  | 0.00  | 3.71  |
| P42227 | Signal transducer and activator of transcription 3                | 208  | 3  | 11  | 1007 | 0.4755 | 2.28 | 6   | 0.00  | 1.30  | 2.22  | 2.66   | 3   | 1.97  | 0.00  | 0.00  | 0.74  |
| O08529 | Calpain-2 catalytic subunit                                       | 575  | 9  | 149 | 163  | 0.1944 | 2.26 | 48  | 13.21 | 13.00 | 7.75  | 14.21  | 21  | 0.00  | 7.65  | 12.15 | 1.48  |
| O35864 | COP9 signalosome complex subunit 5                                | 169  | 3  | 12  | 1302 | 0.3327 | 2.25 | 4   | 0.00  | 0.00  | 1.11  | 2.66   | 2   | 0.00  | 0.00  | 0.93  | 0.74  |
| Q99L04 | Dehydrogenase/reductase SDR family member 1                       | 641  | 10 | 272 | 78   | 0.0003 | 2.25 | 79  | 13.21 | 16.89 | 25.47 | 23.09  | 35  | 5.91  | 7.65  | 10.28 | 11.12 |
| P09405 | Nucleolin                                                         | 542  | 8  | 188 | 275  | 0.0849 | 2.25 | 96  | 24.22 | 24.69 | 19.94 | 27.53  | 43  | 7.88  | 18.18 | 13.08 | 3.71  |
| Q99LC5 | Electron transfer flavoprotein subunit alpha, mitochondrial       | 808  | 10 | 403 | 290  | 0.2272 | 2.25 | 158 | 61.64 | 37.69 | 27.69 | 31.08  | 70  | 17.72 | 0.00  | 28.97 | 23.72 |
| Q8BFY9 | Transportin-1                                                     | 138  | 2  | 9   | 1440 | 0.6135 | 2.22 | 4   | 0.00  | 2.60  | 0.00  | 1.78   | 2   | 1.97  | 0.00  | 0.00  | 0.00  |
| P09103 | Protein disulfide-isomerase                                       | 581  | 8  | 118 | 102  | 0.0771 | 2.22 | 51  | 13.21 | 16.89 | 8.86  | 11.54  | 23  | 3.94  | 15.31 | 2.80  | 0.74  |
| P14733 | Lamin-B1                                                          | 651  | 9  | 83  | 147  | 0.1641 | 2.20 | 36  | 6.60  | 7.80  | 9.97  | 11.54  | 16  | 11.81 | 1.91  | 1.87  | 0.74  |
| P23242 | Gap junction alpha-1 protein                                      | 334  | 6  | 75  | 241  | 0.0457 | 2.19 | 44  | 17.61 | 10.40 | 9.97  | 6.22   | 20  | 7.88  | 6.70  | 1.87  | 3.71  |
| Q8R3B1 | 1-phosphatidylinositol-4,5-bisphosphate phosphodiesterase delta-1 | 189  | 3  | 6   | 1197 | 0.1874 | 2.19 | 2   | 0.00  | 1.30  | 0.00  | 0.89   | 0   | 0.00  | 0.00  | 0.00  | 0.00  |
| Q8VIJ6 | Splicing factor, proline- and glutamine-rich                      | 358  | 6  | 128 | 129  | 0.0792 | 2.19 | 59  | 6.60  | 18.19 | 17.72 | 16.87  | 27  | 5.91  | 8.61  | 3.74  | 8.90  |
| Q6P9K8 | Caskin-1                                                          | 128  | 2  | 14  | 1013 | 0.4677 | 2.18 | 9   | 0.00  | 2.60  | 3.32  | 2.66   | 4   | 3.94  | 0.00  | 0.00  | 0.00  |
| Q64516 | Glycerol kinase                                                   | 365  | 6  | 31  | 250  | 0.0489 | 2.17 | 15  | 6.60  | 5.20  | 1.11  | 1.78   | 7   | 1.97  | 4.78  | 0.00  | 0.00  |
| Q8BMS1 | Trifunctional enzyme subunit alpha, mitochondrial                 | 1576 | 22 | 377 | 383  | 0.0718 | 2.16 | 155 | 46.23 | 51.98 | 24.37 | 32.85  | 72  | 7.88  | 40.19 | 14.95 | 8.90  |
| Q99MN9 | Propionyl-CoA carboxylase beta chain, mitochondrial               | 900  | 14 | 117 | 350  | 0.1857 | 2.16 | 54  | 17.61 | 18.19 | 4.43  | 14.21  | 25  | 5.91  | 10.53 | 6.54  | 2.22  |
| Q99LB6 | Methionine adenosyltransferase 2 subunit beta                     | 306  | 4  | 60  | 407  | 0.2441 | 2.16 | 25  | 6.60  | 9.10  | 4.43  | 4.44   | 11  | 3.94  | 0.00  | 3.74  | 3.71  |
| P40240 | CD9 antigen                                                       | 305  | 4  | 255 | 408  | 0.2447 | 2.15 | 84  | 11.01 | 15.60 | 40.98 | 15.98  | 39  | 17.72 | 9.57  | 5.61  | 5.93  |
| Q9CR51 | V-type proton ATPase subunit G 1                                  | 203  | 3  | 44  | 524  | 0.3951 | 2.14 | 14  | 4.40  | 5.20  | 4.43  | 0.00   | 7   | 3.94  | 0.00  | 1.87  | 0.74  |
| Q9QUR6 | Prolyl endopeptidase                                              | 513  | 8  | 98  | 628  | 0.2148 | 2.14 | 29  | 8.81  | 6.50  | 4.43  | 8.88   | 13  | 1.97  | 7.65  | 3.74  | 0.00  |
| P68181 | cAMP-dependent protein kinase catalytic subunit beta              | 214  | 3  | 77  | 104  | 0.0228 | 2.14 | 29  | 6.60  | 7.80  | 7.75  | 7.10   | 14  | 1.97  | 5.74  | 3.74  | 2.22  |
| Q9QUP5 | Hyaluronan and proteoglycan link protein 1                        | 439  | 6  | 78  | 523  | 0.3911 | 2.14 | 41  | 2.20  | 10.40 | 11.08 | 16.87  | 19  | 5.91  | 6.70  | 5.61  | 0.74  |
| Q9JLN9 | Serine/threonine-protein kinase mTOR                              | 395  | 7  | 22  | 1365 | 0.6370 | 2.13 | 9   | 4.40  | 3.90  | 0.00  | 0.89   | 4   | 0.00  | 0.96  | 1.87  | 1.48  |
| Q9EST5 | Acidic leucine-rich nuclear phosphoprotein 32 family member B     | 135  | 2  | 42  | 326  | 0.1631 | 2.13 | 15  | 2.20  | 3.90  | 2.22  | 7.10   | 7   | 1.97  | 1.91  | 1.87  | 1.48  |
| Q9CZX8 | 40S ribosomal protein S19                                         | 243  | 4  | 99  | 97   | 0.0072 | 2.13 | 38  | 13.21 | 6.50  | 9.97  | 7.99   | 18  | 5.91  | 2.87  | 3.74  | 5.19  |
| Q9Z2D6 | Methyl-CpG-binding protein 2                                      | 267  | 4  | 29  | 889  | 0.5410 | 2.13 | 16  | 0.00  | 3.90  | 4.43  | 7.99   | 8   | 3.94  | 0.00  | 3.74  | 0.00  |
| P47962 | 60S ribosomal protein L5                                          | 283  | 4  | 91  | 493  | 0.3636 | 2.12 | 32  | 13.21 | 13.00 | 2.22  | 3.55   | 15  | 5.91  | 0.00  | 8.41  | 0.74  |
| Q6PB66 | Leucine-rich PPR motif-containing protein, mitochondrial          | 1494 | 23 | 189 | 1017 | 0.7237 | 2.12 | 64  | 35.22 | 19.49 | 0.00  | 9.77   | 30  | 7.88  | 14.35 | 7.48  | 0.74  |
| P14824 | Annexin A6                                                        | 1446 | 21 | 462 | 209  | 0.0904 | 2.12 | 155 | 3     |       |       |        |     |       |       |       |       |

|        |                                                                  |      |    |     |      |        |      |     |       |       |       |       |    |       |       |       |       |
|--------|------------------------------------------------------------------|------|----|-----|------|--------|------|-----|-------|-------|-------|-------|----|-------|-------|-------|-------|
| P68372 | Tubulin beta-2C chain                                            | 140  | 2  | 195 | 350  | 0.1600 | 1.99 | 85  | 22.01 | 20.79 | 28.80 | 13.32 | 43 | 1.97  | 16.27 | 14.02 | 10.38 |
| Q80TL0 | Protein phosphatase 1E                                           | 225  | 4  | 27  | 1021 | 0.1444 | 1.99 | 8   | 2.20  | 2.60  | 1.11  | 1.78  | 4  | 1.97  | 0.96  | 0.93  | 0.00  |
| O70443 | Guanine nucleotide-binding protein G(z) subunit alpha            | 474  | 7  | 119 | 492  | 0.3198 | 1.99 | 42  | 19.81 | 10.40 | 3.32  | 8.88  | 21 | 3.94  | 2.87  | 5.61  | 8.90  |
| Q9ESM3 | Hyaluronan and proteoglycan link protein 2                       | 231  | 4  | 33  | 265  | 0.2610 | 1.99 | 23  | 4.40  | 5.20  | 4.43  | 8.88  | 12 | 5.91  | 0.00  | 5.61  | 0.00  |
| Q9ER00 | Syntaxin-12                                                      | 322  | 5  | 74  | 167  | 0.1128 | 1.99 | 32  | 13.21 | 7.80  | 6.65  | 4.44  | 16 | 3.94  | 10.53 | 0.93  | 0.74  |
| Q9DCN2 | NADH-cytochrome b5 reductase 3                                   | 696  | 11 | 260 | 40   | 0.0050 | 1.99 | 113 | 37.42 | 19.49 | 29.90 | 25.75 | 57 | 15.75 | 12.44 | 15.89 | 12.60 |
| Q80UG5 | Septin-9                                                         | 168  | 3  | 22  | 747  | 0.3529 | 1.98 | 14  | 2.20  | 6.50  | 2.22  | 3.55  | 7  | 3.94  | 0.00  | 1.87  | 1.48  |
| Q8K406 | Leucine-rich repeat LGI family member 3                          | 360  | 6  | 19  | 994  | 0.4093 | 1.98 | 13  | 2.20  | 10.40 | 0.00  | 0.89  | 7  | 3.94  | 2.87  | 0.00  | 0.00  |
| Q3UJU9 | Regulator of microtubule dynamics protein 3                      | 129  | 2  | 4   | 1484 | 0.8349 | 1.98 | 4   | 0.00  | 3.90  | 0.00  | 0.00  | 2  | 1.97  | 0.00  | 0.00  | 0.00  |
| Q60737 | Casein kinase II subunit alpha                                   | 395  | 7  | 78  | 775  | 0.3877 | 1.97 | 30  | 6.60  | 14.30 | 3.32  | 6.22  | 15 | 5.91  | 0.00  | 6.54  | 2.97  |
| Q8R2R9 | AP-3 complex subunit mu-2                                        | 171  | 3  | 6   | 1455 | 0.6040 | 1.96 | 6   | 4.40  | 1.30  | 0.00  | 0.00  | 3  | 1.97  | 0.00  | 0.93  | 0.00  |
| Q8BUV3 | Gephyrin                                                         | 566  | 9  | 61  | 480  | 0.2896 | 1.96 | 27  | 11.01 | 9.10  | 1.11  | 6.22  | 14 | 1.97  | 0.00  | 0.93  | 11.12 |
| Q62443 | Neuronal pentraxin-1                                             | 173  | 3  | 27  | 422  | 0.2161 | 1.95 | 11  | 2.20  | 5.20  | 2.22  | 1.78  | 6  | 3.94  | 0.96  | 0.93  | 0.00  |
| P28271 | Cytoplasmic aconitate hydratase                                  | 564  | 9  | 151 | 547  | 0.3894 | 1.95 | 52  | 15.41 | 15.60 | 3.32  | 17.76 | 27 | 0.00  | 8.61  | 12.15 | 5.93  |
| P23492 | Purine nucleoside phosphorylase                                  | 531  | 8  | 182 | 355  | 0.1487 | 1.95 | 64  | 15.41 | 9.10  | 21.04 | 18.65 | 33 | 3.94  | 11.48 | 13.08 | 4.45  |
| P11352 | Glutathione peroxidase 1                                         | 436  | 6  | 183 | 325  | 0.1156 | 1.95 | 57  | 17.61 | 10.40 | 17.72 | 11.54 | 29 | 11.81 | 9.57  | 6.54  | 1.48  |
| Q9CQU0 | Thioredoxin domain-containing protein 12                         | 153  | 3  | 34  | 226  | 0.1952 | 1.95 | 12  | 2.20  | 1.30  | 4.43  | 4.44  | 6  | 3.94  | 0.00  | 0.93  | 1.48  |
| Q9DBE8 | Alpha-1,3-mannosyltransferase ALG2                               | 379  | 6  | 38  | 713  | 0.2719 | 1.95 | 17  | 8.81  | 2.60  | 1.11  | 4.44  | 9  | 5.91  | 0.00  | 2.80  | 0.00  |
| Q99MR8 | Methylcrotonoyl-CoA carboxylase subunit alpha, mitochondrial     | 352  | 6  | 32  | 757  | 0.3421 | 1.94 | 13  | 4.40  | 3.90  | 1.11  | 3.55  | 7  | 1.97  | 0.96  | 3.74  | 0.00  |
| Q8R1Q8 | Cytoplasmic dynein 1 light intermediate chain 1                  | 276  | 5  | 63  | 1077 | 0.7294 | 1.92 | 20  | 0.00  | 11.70 | 7.75  | 0.89  | 11 | 3.94  | 4.78  | 1.87  | 0.00  |
| P60843 | Eukaryotic initiation factor 4A-1                                | 222  | 3  | 33  | 234  | 0.2077 | 1.92 | 15  | 4.40  | 5.20  | 3.32  | 1.78  | 8  | 3.94  | 0.00  | 3.74  | 0.00  |
| Q9ERK4 | Exportin-2                                                       | 289  | 5  | 35  | 614  | 0.1560 | 1.91 | 14  | 4.40  | 3.90  | 0.00  | 5.33  | 7  | 3.94  | 0.96  | 0.00  | 2.22  |
| Q80YX1 | Tenascin                                                         | 291  | 5  | 23  | 1323 | 0.4853 | 1.91 | 7   | 0.00  | 3.90  | 1.11  | 1.78  | 4  | 0.00  | 0.00  | 2.80  | 0.74  |
| Q61330 | Contactin-2                                                      | 848  | 13 | 165 | 92   | 0.0070 | 1.91 | 70  | 19.81 | 16.89 | 12.18 | 21.31 | 37 | 7.88  | 9.57  | 7.48  | 11.86 |
| P24549 | Retinal dehydrogenase 1                                          | 444  | 7  | 121 | 170  | 0.0930 | 1.90 | 54  | 15.41 | 16.89 | 9.97  | 11.54 | 28 | 5.91  | 16.27 | 4.67  | 1.48  |
| O70133 | ATP-dependent RNA helicase A                                     | 1305 | 20 | 455 | 140  | 0.1551 | 1.90 | 140 | 50.63 | 35.09 | 31.01 | 23.09 | 74 | 9.84  | 25.83 | 14.95 | 22.98 |
| Q62167 | ATP-dependent RNA helicase DDX3X                                 | 135  | 2  | 23  | 1199 | 0.9416 | 1.90 | 11  | 0.00  | 9.10  | 0.00  | 1.78  | 6  | 1.97  | 0.96  | 2.80  | 0.00  |
| Q61990 | Poly(rC)-binding protein 2                                       | 327  | 5  | 167 | 514  | 0.3208 | 1.90 | 56  | 28.62 | 14.30 | 5.54  | 7.10  | 29 | 7.88  | 6.70  | 10.28 | 4.45  |
| O35215 | D-dopachrome decarboxylase                                       | 402  | 6  | 231 | 622  | 0.2659 | 1.90 | 100 | 17.61 | 24.69 | 37.66 | 20.42 | 53 | 25.60 | 0.00  | 14.02 | 13.34 |
| Q9Z1P6 | NADH dehydrogenase [ubiquinone] 1 alpha subcomplex subunit 7     | 263  | 4  | 138 | 849  | 0.4362 | 1.89 | 44  | 17.61 | 9.10  | 15.51 | 1.78  | 23 | 9.84  | 0.00  | 3.74  | 9.64  |
| Q91Z53 | Glyoxylate reductase/hydroxypyruvate reductase                   | 618  | 9  | 161 | 666  | 0.1972 | 1.89 | 57  | 22.01 | 13.00 | 9.97  | 11.54 | 30 | 15.75 | 0.00  | 11.21 | 2.97  |
| Q9QYB5 | Gamma-adducin                                                    | 554  | 9  | 97  | 203  | 0.1587 | 1.89 | 31  | 4.40  | 11.70 | 8.86  | 6.22  | 17 | 3.94  | 4.78  | 1.87  | 5.93  |
| O70480 | Vesicle-associated membrane protein 4                            | 129  | 2  | 24  | 1470 | 0.6787 | 1.88 | 4   | 0.00  | 2.60  | 1.11  | 0.00  | 2  | 1.97  | 0.00  | 0.00  | 0.00  |
| Q8BG39 | Synaptic vesicle glycoprotein 2B                                 | 389  | 6  | 179 | 479  | 0.2644 | 1.88 | 61  | 26.42 | 16.89 | 6.65  | 10.66 | 32 | 11.81 | 2.87  | 13.08 | 4.45  |
| Q99PV0 | Pre-mRNA-processing-splicing factor 8                            | 313  | 5  | 60  | 589  | 0.4066 | 1.88 | 13  | 4.40  | 5.20  | 1.11  | 2.66  | 7  | 0.00  | 0.96  | 4.67  | 1.48  |
| Q99LG2 | Transportin-2                                                    | 109  | 2  | 25  | 1373 | 0.5553 | 1.87 | 5   | 0.00  | 1.30  | 1.11  | 2.66  | 3  | 1.97  | 0.00  | 0.00  | 0.74  |
| Q8C1A5 | Thimet oligopeptidase                                            | 564  | 8  | 85  | 542  | 0.3611 | 1.87 | 27  | 8.81  | 7.80  | 2.22  | 7.99  | 14 | 3.94  | 4.78  | 5.61  | 0.00  |
| Q9JUJ8 | SH3 domain-binding glutamic acid-rich-like protein               | 230  | 3  | 94  | 277  | 0.2450 | 1.86 | 34  | 6.60  | 10.40 | 9.97  | 7.10  | 18 | 3.94  | 0.00  | 8.41  | 5.93  |
| Q68FF6 | ARF GTPase-activating protein GIT1                               | 193  | 3  | 31  | 1369 | 0.5473 | 1.86 | 7   | 2.20  | 1.30  | 3.32  | 0.00  | 4  | 1.97  | 0.96  | 0.00  | 0.74  |
| O88844 | Isocitrate dehydrogenase [NADP] cytoplasmic                      | 638  | 10 | 149 | 803  | 0.3766 | 1.86 | 42  | 2.20  | 7.80  | 17.72 | 14.21 | 23 | 9.84  | 0.00  | 11.21 | 1.48  |
| Q62WX6 | Eukaryotic translation initiation factor 2 subunit 1             | 469  | 7  | 71  | 513  | 0.2992 | 1.84 | 25  | 8.81  | 6.50  | 2.22  | 7.10  | 13 | 5.91  | 0.00  | 3.74  | 3.71  |
| Q9JHW2 | Omega-amidase NIT2                                               | 422  | 7  | 75  | 429  | 0.1948 | 1.84 | 19  | 6.60  | 3.90  | 1.11  | 7.10  | 10 | 1.97  | 6.70  | 0.00  | 1.48  |
| P48318 | Glutamate decarboxylase 1                                        | 674  | 10 | 110 | 410  | 0.1774 | 1.84 | 36  | 13.21 | 13.00 | 3.32  | 6.22  | 19 | 11.81 | 4.78  | 2.80  | 0.00  |
| Q8VDP6 | CDP-diacylglycerol--inositol 3-phosphatidyltransferase           | 379  | 6  | 135 | 341  | 0.1075 | 1.84 | 40  | 17.61 | 9.10  | 6.65  | 6.22  | 21 | 9.84  | 4.78  | 0.93  | 5.93  |
| P14869 | 60S acidic ribosomal protein P0                                  | 603  | 8  | 308 | 362  | 0.2348 | 1.84 | 99  | 37.42 | 19.49 | 21.04 | 21.31 | 54 | 17.72 | 0.00  | 21.49 | 14.83 |
| Q80TL4 | Protein KIAA1045                                                 | 231  | 3  | 33  | 727  | 0.5928 | 1.83 | 11  | 4.40  | 2.60  | 0.00  | 3.55  | 6  | 1.97  | 1.91  | 1.87  | 0.00  |
| Q6ZP3  | Ubiquitin-conjugating enzyme E2 O                                | 384  | 6  | 83  | 1116 | 0.7571 | 1.83 | 19  | 0.00  | 2.60  | 9.97  | 6.22  | 10 | 5.91  | 1.91  | 0.93  | 1.48  |
| P55264 | Adenosine kinase                                                 | 175  | 2  | 51  | 318  | 0.3314 | 1.83 | 20  | 8.81  | 3.90  | 3.32  | 4.44  | 11 | 0.00  | 6.70  | 3.74  | 0.74  |
| Q5SRX1 | TOM1-like protein 2                                              | 259  | 4  | 266 | 417  | 0.2964 | 1.83 | 95  | 6.60  | 41.59 | 23.26 | 23.97 | 52 | 11.81 | 15.31 | 10.28 | 14.83 |
| P47911 | 60S ribosomal protein L6                                         | 132  | 2  | 23  | 926  | 0.4969 | 1.82 | 17  | 8.81  | 6.50  | 1.11  | 0.89  | 9  | 1.97  | 1.91  | 5.61  | 0.00  |
| Q8BME3 | NADP-dependent malic enzyme, mitochondrial                       | 203  | 3  | 42  | 1458 | 0.8453 | 1.81 | 9   | 0.00  | 6.50  | 0.00  | 2.66  | 5  | 0.00  | 0.96  | 1.87  | 2.22  |
| Q9QXV0 | ProSAAS                                                          | 510  | 7  | 496 | 117  | 0.0786 | 1.81 | 171 | 35.22 | 38.99 | 68.67 | 28.41 | 94 | 23.63 | 17.22 | 26.17 | 27.43 |
| Q61941 | NAD(P) transhydrogenase, mitochondrial                           | 347  | 4  | 57  | 711  | 0.2319 | 1.81 | 20  | 4.40  | 5.20  | 2.22  | 7.99  | 11 | 5.91  | 0.96  | 1.87  | 2.22  |
| P62320 | Small nuclear ribonucleoprotein Sm D3                            | 214  | 3  | 107 | 521  | 0.2954 | 1.80 | 26  | 6.60  | 6.50  | 9.97  | 2.66  | 14 | 5.91  | 0.00  | 4.67  | 3.71  |
| P47753 | F-actin-capping protein subunit alpha-1                          | 220  | 4  | 40  | 232  | 0.2288 | 1.80 | 19  | 4.40  | 6.50  | 4.43  | 3.55  | 10 | 7.88  | 0.00  | 1.87  | 0.74  |
| P24288 | Branched-chain-amino-acid aminotransferase, cytosolic            | 256  | 4  | 31  | 714  | 0.2332 | 1.80 | 12  | 0.00  | 6.50  | 1.11  | 4.44  | 7  | 0.00  | 6.70  | 0.00  | 0.00  |
| Q8K212 | Phosphofurin acidic cluster sorting protein 1                    | 198  | 3  | 23  | 1487 | 0.7751 | 1.80 | 6   | 0.00  | 0.00  | 4.43  | 1.78  | 3  | 1.97  | 0.00  | 0.00  | 1.48  |
| Q8R5C5 | Beta-centractin                                                  | 206  | 3  | 120 | 510  | 0.2781 | 1.79 | 38  | 6.60  | 6.50  | 11.08 | 14.21 | 21 | 5.91  | 9.57  | 3.74  | 2.22  |
| Q9D8W5 | 26S proteasome non-ATPase regulatory subunit 12                  | 366  | 6  | 29  | 1167 | 0.5449 | 1.79 | 9   | 2.20  | 3.90  | 3.32  | 0.00  | 5  | 0.00  | 1.91  | 1.87  | 1.48  |
| O70591 | Prefoldin subunit 2                                              | 290  | 4  | 84  | 544  | 0.3306 | 1.78 | 25  | 6.60  | 5.20  | 11.08 | 1.78  | 14 | 5.91  | 3.83  | 1.87  | 2.22  |
| O54774 | AP-3 complex subunit delta-1                                     | 747  | 13 | 151 | 401  | 0.4152 | 1.78 | 57  | 19.81 | 16.89 | 4.43  | 15.98 | 32 | 5.91  | 4.78  | 14.02 | 7.41  |
| Q9WVC2 | Ly-6/neurotoxin-like protein 1                                   | 175  | 3  | 32  | 1047 | 0.3994 | 1.78 | 14  | 8.81  | 3.90  | 1.11  | 0.00  | 8  | 5.91  | 0.00  | 1.87  | 0.00  |
| P48678 | Lamin-A/C                                                        | 960  | 14 | 165 | 381  | 0.1274 | 1.77 | 72  | 17.61 | 19.49 | 15.51 | 19.53 | 41 | 15.75 | 16.27 | 2.80  | 5.93  |
| Q60676 | Serine/threonine-protein phosphatase 5                           | 333  | 5  | 76  | 951  | 0.4993 | 1.77 | 25  | 11.01 | 5.20  | 1.11  | 7.99  | 14 | 1.97  | 7.65  | 4.67  | 0.00  |
| Q9JIF0 | Protein arginine N-methyltransferase 1                           | 241  | 4  | 25  | 624  | 0.4134 | 1.77 | 10  | 2.20  | 1.30  | 2.22  | 4.44  | 6  | 1.97  | 1.91  | 1.87  | 0.00  |
| Q3UYC0 | Protein phosphatase 1H                                           | 191  | 3  | 69  | 155  | 0.0287 | 1.76 | 18  | 4.40  | 6.50  | 3.32  | 3.55  | 10 | 1.97  | 3.83  | 2.80  | 1.48  |
| P14148 | 60S ribosomal protein L7                                         | 386  | 6  | 141 | 126  | 0.0254 | 1.75 | 56  | 13.21 | 10.40 | 14.40 | 17.76 | 32 | 9.84  | 6.70  | 5.61  | 9.64  |
| P11031 | Activated RNA polymerase II transcriptional coactivator p15      | 344  | 6  | 123 | 307  | 0.2760 | 1.75 | 38  | 11.01 | 10.40 | 12.18 | 4.44  | 22 | 13.78 | 0.00  | 2.80  | 5.19  |
| Q8CGK3 | Lon protease homolog, mitochondrial                              | 514  | 8  | 91  | 856  | 0.3949 | 1.74 | 22  | 2.20  | 5.20  | 5.54  | 8.88  | 13 | 3.94  | 6.70  | 1.87  | 0.00  |
| P70398 | Probable ubiquitin carboxyl-terminal hydrolase FAF-X             | 1245 | 20 | 236 | 322  | 0.3115 | 1.74 | 56  | 22.01 | 14.30 | 4.43  | 15.09 | 32 | 9.84  | 8.61  | 8.41  | 5.19  |
| O70318 | Band 4.1-like protein 2                                          | 294  | 5  | 129 | 680  | 0.4873 | 1.74 | 39  | 2.20  | 16.89 | 9.97  | 9.77  | 22 | 7.88  | 6.70  | 1.87  | 5.93  |
| Q99LD8 | N(G),N(G)-dimethylarginine dimethylaminohydrolase 2              | 178  | 3  | 71  | 543  | 0.3141 | 1.74 | 32  | 8.81  | 3.90  | 11.08 | 7.99  | 18 | 7.88  | 6.70  | 3.74  | 0.00  |
| Q9D0S9 | Histidine triad nucleotide-binding protein 2, mitochondrial      | 282  | 4  | 164 | 767  | 0.2879 | 1.73 | 44  | 11.01 | 13.00 | 13.29 | 6.22  | 25 | 7.88  | 0.00  | 12.15 | 5.19  |
| O70325 | Phospholipid hydroperoxide glutathione peroxidase, mitochondrial | 106  | 2  | 45  | 529  | 0.2854 | 1.72 | 17  | 4.40  | 2.60  | 7.75  | 2.66  | 10 | 7.88  | 0.00  | 0.00  | 2.22  |

|        |                                                                     |      |    |      |      |        |      |     |       |        |        |        |     |       |        |       |       |
|--------|---------------------------------------------------------------------|------|----|------|------|--------|------|-----|-------|--------|--------|--------|-----|-------|--------|-------|-------|
| Q99020 | Heterogeneous nuclear ribonucleoprotein A/B                         | 123  | 2  | 65   | 399  | 0.1095 | 1.65 | 27  | 6.60  | 7.80   | 6.65   | 6.22   | 17  | 3.94  | 2.87   | 7.48  | 2.22  |
| Q9D115 | Methylmalonyl-CoA epimerase, mitochondrial                          | 139  | 2  | 55   | 843  | 0.3562 | 1.65 | 11  | 2.20  | 3.90   | 4.43   | 0.89   | 7   | 0.00  | 0.96   | 3.74  | 2.22  |
| P21619 | Lamin-B2                                                            | 732  | 12 | 165  | 537  | 0.2622 | 1.65 | 60  | 8.81  | 11.70  | 19.94  | 19.53  | 36  | 7.88  | 16.27  | 5.61  | 6.67  |
| O88342 | WD repeat-containing protein 1                                      | 888  | 13 | 506  | 316  | 0.1308 | 1.65 | 148 | 28.62 | 49.39  | 25.47  | 44.40  | 90  | 27.57 | 37.32  | 13.08 | 11.86 |
| Q91ZA3 | Propionyl-CoA carboxylase alpha chain, mitochondrial                | 578  | 9  | 54   | 858  | 0.3673 | 1.64 | 27  | 11.01 | 9.10   | 2.22   | 4.44   | 16  | 7.88  | 1.91   | 6.54  | 0.00  |
| Q62318 | Transcription intermediary factor 1-beta                            | 357  | 6  | 47   | 911  | 0.7817 | 1.64 | 18  | 0.00  | 5.20   | 7.75   | 5.33   | 11  | 5.91  | 1.91   | 1.87  | 1.48  |
| P10852 | 4F2 cell-surface antigen heavy chain                                | 562  | 9  | 355  | 278  | 0.0595 | 1.63 | 105 | 17.61 | 37.69  | 21.04  | 28.41  | 64  | 7.88  | 26.79  | 6.54  | 22.98 |
| Q99KK2 | N-acylneuraminase cytidylyltransferase                              | 192  | 3  | 18   | 1141 | 0.6985 | 1.63 | 11  | 4.40  | 0.00   | 1.11   | 5.33   | 7   | 0.00  | 4.78   | 1.87  | 0.00  |
| Q9CWS0 | N(G),N(G)-dimethylarginine dimethylaminohydrolase 1                 | 754  | 12 | 273  | 471  | 0.3078 | 1.63 | 82  | 26.42 | 19.49  | 13.29  | 23.09  | 51  | 19.69 | 0.00   | 20.56 | 10.38 |
| P28660 | Nck-associated protein 1                                            | 1253 | 19 | 439  | 130  | 0.0553 | 1.62 | 106 | 24.22 | 25.99  | 16.61  | 39.07  | 65  | 9.84  | 19.14  | 14.02 | 22.24 |
| Q9J16  | Alcohol dehydrogenase [NADP+]                                       | 545  | 8  | 279  | 565  | 0.2947 | 1.62 | 81  | 15.41 | 18.19  | 27.69  | 19.53  | 50  | 15.75 | 0.00   | 17.76 | 16.31 |
| P42208 | Septin-2                                                            | 816  | 12 | 199  | 477  | 0.3121 | 1.62 | 86  | 13.21 | 22.09  | 19.94  | 31.08  | 53  | 23.63 | 12.44  | 11.21 | 5.93  |
| Q8CAA7 | Glucose 1,6-bisphosphate synthase                                   | 549  | 9  | 151  | 249  | 0.1432 | 1.62 | 35  | 8.81  | 14.30  | 3.32   | 8.88   | 22  | 0.00  | 20.09  | 0.93  | 0.74  |
| Q8K0S0 | Phytanoyl-CoA hydroxylase-interacting protein                       | 325  | 5  | 133  | 561  | 0.2840 | 1.62 | 39  | 17.61 | 6.50   | 6.65   | 7.99   | 24  | 7.88  | 0.00   | 9.35  | 6.67  |
| Q8BIJ6 | Isoleucyl-tRNA synthetase, mitochondrial                            | 422  | 7  | 105  | 511  | 0.2179 | 1.62 | 38  | 11.01 | 15.60  | 4.43   | 7.10   | 24  | 1.97  | 12.44  | 4.67  | 4.45  |
| Q3U1J4 | DNA damage-binding protein 1                                        | 364  | 6  | 85   | 505  | 0.2093 | 1.62 | 28  | 8.81  | 3.90   | 5.54   | 9.77   | 17  | 1.97  | 1.91   | 7.48  | 5.93  |
| Q8OUW2 | F-box only protein 2                                                | 582  | 8  | 152  | 412  | 0.3766 | 1.62 | 62  | 17.61 | 22.09  | 5.54   | 16.87  | 38  | 23.63 | 0.00   | 10.28 | 4.45  |
| Q61598 | Rab GDP dissociation inhibitor beta                                 | 1627 | 24 | 627  | 371  | 0.2154 | 1.61 | 216 | 44.03 | 48.09  | 54.27  | 69.26  | 134 | 23.63 | 65.07  | 31.77 | 13.34 |
| P49443 | Protein phosphatase 1A                                              | 233  | 3  | 50   | 629  | 0.3688 | 1.61 | 15  | 2.20  | 1.30   | 5.54   | 6.22   | 9   | 1.97  | 0.96   | 6.54  | 0.00  |
| P97447 | Four and a half LIM domains protein 1                               | 137  | 2  | 23   | 1495 | 0.7353 | 1.61 | 7   | 4.40  | 1.30   | 0.00   | 0.89   | 4   | 0.00  | 0.00   | 1.87  | 2.22  |
| Q80SW1 | Putative adenosylhomocysteinase 2                                   | 593  | 10 | 205  | 525  | 0.2284 | 1.60 | 54  | 8.81  | 18.19  | 11.08  | 15.98  | 34  | 5.91  | 15.31  | 10.28 | 2.22  |
| Q8CGY8 | UDP-N-acetylglucosamine-peptide N-acetylglucosaminyltransferase     | 833  | 13 | 190  | 565  | 0.2834 | 1.60 | 58  | 15.41 | 13.00  | 9.97   | 19.53  | 36  | 1.97  | 10.53  | 14.02 | 9.64  |
| P80317 | T-complex protein 1 subunit zeta                                    | 787  | 12 | 263  | 159  | 0.0871 | 1.60 | 86  | 22.01 | 31.19  | 12.18  | 20.42  | 54  | 13.78 | 22.96  | 10.28 | 6.67  |
| Q6P1F6 | Serine/threonine-protein phosphatase 2A 55 kDa regulatory subunit B | 272  | 4  | 44   | 289  | 0.1859 | 1.60 | 12  | 2.20  | 2.60   | 4.43   | 2.66   | 7   | 1.97  | 2.87   | 1.87  | 0.74  |
| Q9CPW0 | Contactin-associated protein-like 2                                 | 470  | 7  | 192  | 287  | 0.1805 | 1.59 | 47  | 8.81  | 11.70  | 12.18  | 14.21  | 29  | 1.97  | 11.48  | 1.87  | 14.08 |
| Q9EQH3 | Vacuolar protein sorting-associated protein 35                      | 1068 | 18 | 358  | 285  | 0.2931 | 1.59 | 119 | 37.42 | 31.19  | 12.18  | 38.18  | 75  | 21.66 | 25.83  | 16.82 | 10.38 |
| Q921M7 | Protein FAM49B                                                      | 582  | 8  | 209  | 499  | 0.1878 | 1.59 | 62  | 17.61 | 19.49  | 13.29  | 11.54  | 39  | 19.69 | 3.83   | 10.28 | 5.19  |
| P26443 | Glutamate dehydrogenase 1, mitochondrial                            | 1813 | 27 | 1561 | 99   | 0.0860 | 1.59 | 468 | 72.65 | 135.16 | 114.08 | 145.62 | 294 | 49.22 | 130.13 | 61.68 | 53.37 |
| P15508 | Spectrin beta chain, erythrocyte                                    | 2346 | 36 | 478  | 177  | 0.1355 | 1.58 | 148 | 52.83 | 36.39  | 25.47  | 33.74  | 94  | 19.69 | 36.36  | 21.49 | 16.31 |
| Q9D8E6 | 60S ribosomal protein L4                                            | 250  | 4  | 47   | 895  | 0.3767 | 1.58 | 21  | 11.01 | 3.90   | 1.11   | 5.33   | 14  | 5.91  | 6.70   | 0.93  | 0.00  |
| P40630 | Transcription factor A, mitochondrial                               | 162  | 3  | 9    | 1411 | 0.3311 | 1.57 | 3   | 2.20  | 0.00   | 0.00   | 0.89   | 2   | 1.97  | 0.00   | 0.00  | 0.00  |
| P29391 | Ferritin light chain 1                                              | 383  | 5  | 211  | 670  | 0.3975 | 1.57 | 57  | 6.60  | 7.80   | 21.04  | 21.31  | 36  | 3.94  | 16.27  | 13.08 | 2.97  |
| Q99KP3 | Lambda-crystallin homolog                                           | 205  | 3  | 23   | 1284 | 0.6342 | 1.56 | 7   | 2.20  | 2.60   | 0.00   | 2.66   | 5   | 1.97  | 0.00   | 2.80  | 0.00  |
| P22315 | Ferrochelatase, mitochondrial                                       | 194  | 3  | 23   | 1406 | 0.5187 | 1.56 | 9   | 4.40  | 2.60   | 0.00   | 1.78   | 6   | 3.94  | 0.00   | 0.93  | 0.74  |
| P06745 | Glucose-6-phosphate isomerase                                       | 1821 | 27 | 1583 | 138  | 0.1608 | 1.55 | 471 | 72.65 | 202.74 | 100.79 | 95.01  | 303 | 64.98 | 81.33  | 64.48 | 92.66 |
| Q9DBF1 | Alpha-aminoadipic semialdehyde dehydrogenase                        | 844  | 13 | 197  | 576  | 0.2711 | 1.55 | 66  | 15.41 | 19.49  | 11.08  | 20.42  | 43  | 7.88  | 17.22  | 14.02 | 3.71  |
| P48036 | Annexin A5                                                          | 1254 | 19 | 678  | 133  | 0.0773 | 1.55 | 207 | 59.44 | 29.89  | 74.21  | 43.51  | 134 | 25.60 | 25.83  | 47.66 | 34.84 |
| Q9EQU5 | Protein SET                                                         | 170  | 3  | 47   | 346  | 0.2623 | 1.54 | 14  | 2.20  | 3.90   | 2.22   | 5.33   | 9   | 1.97  | 0.00   | 0.93  | 5.93  |
| Q8VDD5 | Myosin-9                                                            | 2207 | 34 | 611  | 115  | 0.0427 | 1.54 | 200 | 50.63 | 50.68  | 52.06  | 47.06  | 130 | 29.53 | 43.06  | 36.45 | 20.76 |
| Q3UZP4 | Small VCP/p97-interacting protein                                   | 185  | 3  | 9    | 1510 | 0.7918 | 1.54 | 7   | 0.00  | 3.90   | 3.32   | 0.00   | 5   | 3.94  | 0.00   | 0.00  | 0.74  |
| P40124 | Adenylyl cyclase-associated protein 1                               | 729  | 11 | 244  | 374  | 0.1582 | 1.54 | 94  | 22.01 | 44.19  | 9.97   | 17.76  | 61  | 15.75 | 29.66  | 10.28 | 5.19  |
| P32848 | Parvalbumin alpha                                                   | 381  | 6  | 178  | 821  | 0.2685 | 1.54 | 68  | 13.21 | 11.70  | 29.90  | 13.32  | 44  | 13.78 | 0.00   | 21.49 | 8.90  |
| Q9CPY7 | Cytosol aminopeptidase                                              | 888  | 14 | 243  | 610  | 0.4425 | 1.53 | 82  | 17.61 | 28.59  | 8.86   | 26.64  | 53  | 13.78 | 18.18  | 20.56 | 0.74  |
| Q9EQF5 | Dihydropyrimidinase                                                 | 138  | 2  | 99   | 743  | 0.4928 | 1.53 | 38  | 6.60  | 10.40  | 18.83  | 2.66   | 25  | 9.84  | 7.65   | 4.67  | 2.97  |
| P80316 | T-complex protein 1 subunit epsilon                                 | 635  | 10 | 184  | 343  | 0.2541 | 1.53 | 48  | 15.41 | 18.19  | 7.75   | 7.10   | 32  | 3.94  | 13.40  | 8.41  | 5.93  |
| Q9QZM0 | Ubiquilin-2                                                         | 179  | 3  | 77   | 496  | 0.1717 | 1.53 | 23  | 11.01 | 6.50   | 2.22   | 3.55   | 15  | 5.91  | 6.70   | 1.87  | 0.74  |
| P22892 | AP-1 complex subunit gamma-1                                        | 534  | 8  | 59   | 760  | 0.5071 | 1.53 | 21  | 2.20  | 10.40  | 3.32   | 5.33   | 14  | 3.94  | 3.83   | 4.67  | 1.48  |
| Q9Z1N5 | Spliceosome RNA helicase Bat1                                       | 218  | 3  | 77   | 1003 | 0.8540 | 1.53 | 22  | 6.60  | 5.20   | 0.00   | 9.77   | 14  | 3.94  | 4.78   | 4.67  | 0.74  |
| Q8R081 | Heterogeneous nuclear ribonucleoprotein L                           | 593  | 9  | 226  | 663  | 0.3820 | 1.52 | 71  | 15.41 | 16.89  | 12.18  | 26.64  | 47  | 15.75 | 20.09  | 9.35  | 1.48  |
| Q71LX4 | Talin-2                                                             | 1612 | 25 | 341  | 726  | 0.4618 | 1.52 | 65  | 6.60  | 19.49  | 26.58  | 12.43  | 43  | 13.78 | 3.83   | 14.02 | 11.12 |
| Q60625 | Intercellular adhesion molecule 5                                   | 223  | 3  | 76   | 874  | 0.6613 | 1.52 | 15  | 6.60  | 5.20   | 1.11   | 1.78   | 10  | 1.97  | 1.91   | 2.80  | 2.97  |
| Q8CAY6 | Acetyl-CoA acetyltransferase, cytosolic                             | 406  | 6  | 158  | 600  | 0.2833 | 1.52 | 49  | 6.60  | 15.60  | 7.75   | 19.53  | 33  | 0.00  | 12.44  | 11.21 | 8.90  |
| Q8VDM4 | 26S proteasome non-ATPase regulatory subunit 2                      | 370  | 6  | 106  | 957  | 0.4053 | 1.52 | 24  | 6.60  | 5.20   | 2.22   | 9.77   | 16  | 0.00  | 7.65   | 2.80  | 5.19  |
| Q04690 | Neurofibromin                                                       | 389  | 6  | 49   | 1245 | 0.8180 | 1.52 | 13  | 0.00  | 5.20   | 2.22   | 5.33   | 8   | 1.97  | 2.87   | 2.80  | 0.74  |
| Q9JHU9 | Inositol-3-phosphate synthase 1                                     | 287  | 4  | 22   | 1506 | 0.7630 | 1.51 | 7   | 4.40  | 1.30   | 1.11   | 0.00   | 5   | 0.00  | 0.96   | 2.80  | 0.74  |
| Q64674 | Spermidine synthase                                                 | 292  | 5  | 46   | 507  | 0.1767 | 1.51 | 13  | 6.60  | 1.30   | 3.32   | 1.78   | 9   | 3.94  | 0.00   | 4.67  | 0.00  |
| O35643 | AP-1 complex subunit beta-1                                         | 989  | 16 | 271  | 682  | 0.5248 | 1.51 | 79  | 19.81 | 37.69  | 9.97   | 11.54  | 52  | 13.78 | 8.61   | 12.15 | 17.79 |
| P34884 | Macrophage migration inhibitory factor                              | 289  | 4  | 231  | 798  | 0.3720 | 1.51 | 98  | 22.01 | 25.99  | 35.44  | 14.21  | 65  | 31.50 | 0.00   | 10.28 | 22.98 |
| P35505 | Fumarylacetoacetase                                                 | 455  | 8  | 44   | 467  | 0.3924 | 1.50 | 18  | 2.20  | 5.20   | 3.32   | 7.10   | 12  | 1.97  | 0.00   | 8.41  | 1.48  |
| P08113 | Endoplasmic reticulum chaperone protein BiP                         | 1159 | 18 | 423  | 386  | 0.1544 | 1.50 | 122 | 28.62 | 25.99  | 19.94  | 47.95  | 82  | 9.84  | 30.62  | 12.15 | 28.91 |
| P34022 | Ran-specific GTPase-activating protein                              | 320  | 5  | 88   | 446  | 0.3738 | 1.50 | 25  | 8.81  | 3.90   | 7.75   | 4.44   | 17  | 1.97  | 10.53  | 1.87  | 2.22  |
| Q8BGN3 | Ectonucleotide pyrophosphatase/phosphodiesterase family member 6    | 189  | 3  | 17   | 1416 | 0.9186 | 1.50 | 13  | 0.00  | 10.40  | 0.00   | 2.66   | 9   | 5.91  | 0.00   | 2.80  | 0.00  |
| Q9D0F9 | Phosphoglucomutase-1                                                | 1022 | 15 | 420  | 522  | 0.3104 | 1.50 | 130 | 37.42 | 38.99  | 18.83  | 34.63  | 87  | 17.72 | 32.53  | 28.97 | 7.41  |
| P57780 | Alpha-actinin-4                                                     | 886  | 13 | 261  | 125  | 0.0024 | 1.50 | 85  | 15.41 | 19.49  | 17.72  | 31.97  | 57  | 9.84  | 13.40  | 10.28 | 22.98 |
| Q6ZQ38 | Cullin-associated NEDD8-dissociated protein 1                       | 1815 | 27 | 769  | 572  | 0.4293 | 1.50 | 219 | 88.06 | 64.98  | 23.26  | 42.62  | 146 | 13.78 | 70.81  | 36.45 | 25.20 |
| Q9QUH0 | Glutaredoxin-1                                                      | 310  | 5  | 51   | 855  | 0.6142 | 1.50 | 32  | 8.81  | 10.40  | 12.18  | 0.89   | 22  | 9.84  | 0.00   | 6.54  | 5.19  |
| Q62048 | Astrocytic phosphoprotein PEA-15                                    | 340  | 5  | 308  | 706  | 0.4078 | 1.49 | 71  | 19.81 | 22.09  | 18.83  | 9.77   | 47  | 11.81 | 0.00   | 16.82 | 18.53 |
| Q99JB2 | Stomatin-like protein 2                                             | 340  | 5  | 46   | 529  | 0.4651 | 1.49 | 14  | 4.40  | 5.20   | 1.11   | 3.55   | 10  | 3.94  | 0.00   | 5.61  | 0.00  |
| P80315 | T-complex protein 1 subunit delta                                   | 1102 | 16 | 365  | 532  | 0.3147 | 1.49 | 108 | 28.62 | 32.49  | 15.51  | 31.08  | 72  | 9.84  | 30.62  | 24.30 | 7.41  |
| P63082 | V-type proton ATPase 16 kDa proteolipid subunit                     | 409  | 7  | 177  | 893  | 0.4588 | 1.49 | 84  | 26.42 | 38.99  | 13.29  | 5.33   | 56  | 33.47 | 7.65   | 1.87  | 13.34 |
| Q8VBW6 | NEDD8-activating enzyme E1 regulatory subunit                       | 296  | 5  | 51   | 435  | 0.3506 | 1.49 | 13  | 2.20  | 3.90   | 3.32   | 3.55   | 9   | 3.94  | 3.83   | 0.93  | 0.00  |
| P11983 | T-complex protein 1 subunit alpha                                   | 1194 | 17 | 340  | 206  | 0.1400 | 1.49 | 103 | 22.01 | 31.19  | 25.47  | 23.97  | 69  | 15.75 | 27.75  | 18.69 | 6.67  |
| Q9D8B3 | Charged multivesicular body protein 4b                              | 384  | 6  | 71   | 822  | 0.5498 | 1.49 | 21  | 2.20  | 3.90   | 9.97   | 4.44   | 14  | 3.94  | 5.74   | 1.87  | 2.2   |

|        |                                                                                          |      |    |      |      |        |      |     |        |        |        |        |     |       |        |        |       |
|--------|------------------------------------------------------------------------------------------|------|----|------|------|--------|------|-----|--------|--------|--------|--------|-----|-------|--------|--------|-------|
| Q9QXY6 | EH domain-containing protein 3                                                           | 383  | 6  | 47   | 1242 | 0.7231 | 1.42 | 18  | 8.81   | 6.50   | 2.22   | 0.00   | 12  | 5.91  | 3.83   | 1.87   | 0.74  |
| Q8BWT1 | 3-ketoacyl-CoA thiolase, mitochondrial                                                   | 676  | 10 | 120  | 395  | 0.2311 | 1.42 | 40  | 8.81   | 13.00  | 7.75   | 10.66  | 28  | 7.88  | 6.70   | 9.35   | 4.45  |
| Q9D0T1 | NHP2-like protein 1                                                                      | 153  | 2  | 28   | 1298 | 0.5440 | 1.42 | 9   | 2.20   | 3.90   | 3.32   | 0.00   | 7   | 5.91  | 0.00   | 0.00   | 0.74  |
| Q8VCW8 | Acyl-CoA synthetase family member 2, mitochondrial                                       | 411  | 7  | 35   | 1006 | 0.7463 | 1.42 | 12  | 4.40   | 5.20   | 0.00   | 2.66   | 9   | 3.94  | 1.91   | 2.80   | 0.00  |
| O08532 | Voltage-dependent calcium channel subunit alpha-2/delta-1                                | 1319 | 20 | 387  | 453  | 0.4435 | 1.42 | 97  | 33.02  | 31.19  | 6.65   | 26.64  | 69  | 17.72 | 19.14  | 11.21  | 20.76 |
| Q9CQY6 | Uncharacterized protein C6orf125 homolog                                                 | 217  | 3  | 71   | 997  | 0.3892 | 1.41 | 21  | 4.40   | 6.50   | 7.75   | 2.66   | 15  | 7.88  | 4.78   | 0.93   | 1.48  |
| Q8BJU0 | Small glutamine-rich tetratricopeptide repeat-containing protein alpha                   | 293  | 5  | 50   | 1262 | 0.7401 | 1.41 | 12  | 6.60   | 2.60   | 0.00   | 2.66   | 8   | 3.94  | 0.00   | 3.74   | 0.74  |
| P97765 | WW domain-binding protein 2                                                              | 174  | 2  | 66   | 931  | 0.2974 | 1.41 | 27  | 11.01  | 3.90   | 5.54   | 6.22   | 19  | 5.91  | 0.00   | 9.35   | 3.71  |
| Q922S4 | cGMP-dependent 3',5'-cyclic phosphodiesterase                                            | 522  | 8  | 114  | 796  | 0.1688 | 1.41 | 38  | 8.81   | 13.00  | 4.43   | 11.54  | 27  | 1.97  | 13.40  | 1.87   | 9.64  |
| P62983 | Ubiquitin-40S ribosomal protein S27a                                                     | 108  | 2  | 31   | 1409 | 0.7849 | 1.40 | 9   | 2.20   | 3.90   | 0.00   | 2.66   | 6   | 1.97  | 0.00   | 2.80   | 1.48  |
| Q05816 | Fatty acid-binding protein, epidermal                                                    | 1106 | 16 | 736  | 574  | 0.3092 | 1.40 | 151 | 41.83  | 42.89  | 46.52  | 19.53  | 108 | 47.25 | 10.53  | 29.90  | 20.02 |
| P26638 | Seryl-tRNA synthetase, cytoplasmic                                                       | 597  | 9  | 176  | 888  | 0.2535 | 1.40 | 41  | 13.21  | 14.30  | 7.75   | 6.22   | 30  | 5.91  | 17.22  | 6.54   | 0.00  |
| Q9CQF3 | Cleavage and polyadenylation specificity factor subunit 5                                | 256  | 4  | 46   | 710  | 0.0688 | 1.40 | 19  | 8.81   | 2.60   | 4.43   | 3.55   | 14  | 7.88  | 1.91   | 1.87   | 2.22  |
| P40142 | Transketolase                                                                            | 1064 | 15 | 694  | 257  | 0.1867 | 1.39 | 213 | 46.23  | 51.98  | 57.59  | 56.83  | 153 | 35.44 | 59.32  | 36.45  | 21.50 |
| Q9WUR2 | Peroxisomal 3,2-trans-enoyl-CoA isomerase                                                | 247  | 4  | 25   | 1325 | 0.8601 | 1.39 | 11  | 0.00   | 5.20   | 1.11   | 4.44   | 8   | 3.94  | 1.91   | 1.87   | 0.00  |
| Q9CYH2 | Uncharacterized protein C10orf58 homolog                                                 | 250  | 4  | 88   | 1047 | 0.4192 | 1.39 | 32  | 17.61  | 2.60   | 7.75   | 3.55   | 23  | 13.78 | 4.78   | 1.87   | 2.22  |
| P07724 | Serum albumin                                                                            | 1918 | 28 | 2308 | 457  | 0.2951 | 1.39 | 501 | 156.30 | 105.27 | 121.83 | 117.21 | 360 | 49.22 | 153.10 | 106.54 | 51.15 |
| Q8C94  | Glycogen phosphorylase, brain form                                                       | 1832 | 27 | 1081 | 255  | 0.2645 | 1.39 | 302 | 63.84  | 67.58  | 60.92  | 109.22 | 217 | 17.72 | 75.59  | 59.81  | 63.75 |
| P62717 | 60S ribosomal protein L18a                                                               | 246  | 4  | 89   | 608  | 0.1998 | 1.39 | 27  | 13.21  | 5.20   | 5.54   | 3.55   | 20  | 7.88  | 6.70   | 3.74   | 1.48  |
| Q91YQ5 | Dolichyl-diphosphooligosaccharide--protein glycosyltransferase subunit 1                 | 195  | 3  | 40   | 585  | 0.1832 | 1.39 | 18  | 6.60   | 5.20   | 2.22   | 3.55   | 13  | 5.91  | 1.91   | 1.87   | 2.97  |
| Q5SQX6 | Cytoplasmic FMR1-interacting protein 2                                                   | 980  | 16 | 327  | 295  | 0.1953 | 1.39 | 80  | 26.42  | 24.69  | 12.18  | 16.87  | 58  | 9.84  | 23.92  | 8.41   | 15.57 |
| Q9R1V7 | Disintegrin and metalloproteinase domain-containing protein 23                           | 242  | 4  | 73   | 626  | 0.2200 | 1.39 | 20  | 4.40   | 5.20   | 5.54   | 5.33   | 15  | 1.97  | 5.74   | 1.87   | 5.19  |
| P70704 | Probable phospholipid-transporting ATPase 1A                                             | 456  | 7  | 147  | 959  | 0.6492 | 1.39 | 53  | 22.01  | 14.30  | 4.43   | 12.43  | 38  | 3.94  | 6.70   | 15.89  | 11.86 |
| P14211 | Calreticulin                                                                             | 626  | 10 | 256  | 867  | 0.6927 | 1.38 | 74  | 4.40   | 28.59  | 21.04  | 20.42  | 54  | 21.66 | 18.18  | 6.54   | 7.41  |
| Q99K48 | Non-POU domain-containing octamer-binding protein                                        | 294  | 5  | 45   | 863  | 0.5192 | 1.38 | 15  | 2.20   | 3.90   | 6.65   | 2.66   | 11  | 3.94  | 4.78   | 0.93   | 1.48  |
| A2ASS6 | Titin                                                                                    | 350  | 7  | 46   | 735  | 0.3822 | 1.38 | 18  | 4.40   | 6.50   | 4.43   | 2.66   | 13  | 5.91  | 0.96   | 4.67   | 1.48  |
| P35564 | Calnexin                                                                                 | 590  | 10 | 341  | 358  | 0.2886 | 1.38 | 88  | 24.22  | 24.69  | 23.26  | 15.98  | 64  | 13.78 | 21.05  | 7.48   | 21.50 |
| Q9Z204 | Heterogeneous nuclear ribonucleoproteins C1/C2                                           | 359  | 5  | 160  | 1000 | 0.3675 | 1.38 | 50  | 6.60   | 15.60  | 17.72  | 9.77   | 36  | 9.84  | 0.96   | 21.49  | 3.71  |
| O35593 | 26S proteasome non-ATPase regulatory subunit 14                                          | 213  | 4  | 66   | 986  | 0.3489 | 1.38 | 17  | 4.40   | 2.60   | 6.65   | 3.55   | 12  | 3.94  | 0.00   | 1.87   | 6.67  |
| Q9ESX5 | H/ACA ribonucleoprotein complex subunit 4                                                | 126  | 2  | 4    | 1544 | 0.9642 | 1.37 | 3   | 0.00   | 2.60   | 0.00   | 0.00   | 2   | 0.00  | 0.96   | 0.93   | 0.00  |
| Q8K4Z3 | Apolipoprotein A-I-binding protein                                                       | 252  | 4  | 219  | 576  | 0.4320 | 1.37 | 61  | 17.61  | 9.10   | 23.26  | 10.66  | 44  | 3.94  | 12.44  | 15.89  | 11.86 |
| Q8BGB7 | Enolase-phosphatase E1                                                                   | 131  | 2  | 50   | 782  | 0.4261 | 1.37 | 13  | 4.40   | 2.60   | 2.22   | 3.55   | 9   | 1.97  | 1.91   | 4.67   | 0.74  |
| Q9JMA1 | Ubiquitin carboxyl-terminal hydrolase 14                                                 | 447  | 7  | 98   | 346  | 0.1583 | 1.37 | 30  | 6.60   | 11.70  | 4.43   | 7.10   | 22  | 5.91  | 6.70   | 4.67   | 4.45  |
| P07309 | Transthyretin                                                                            | 235  | 3  | 100  | 1300 | 0.7829 | 1.37 | 13  | 4.40   | 1.30   | 7.75   | 0.00   | 10  | 1.97  | 0.00   | 5.61   | 2.22  |
| P62881 | Guanine nucleotide-binding protein subunit beta-5                                        | 403  | 6  | 96   | 1117 | 0.4771 | 1.37 | 27  | 6.60   | 10.40  | 4.43   | 5.33   | 19  | 1.97  | 0.96   | 8.41   | 8.15  |
| Q64521 | Glycerol-3-phosphate dehydrogenase, mitochondrial                                        | 1901 | 27 | 716  | 427  | 0.1595 | 1.37 | 211 | 46.23  | 66.28  | 47.63  | 50.61  | 154 | 29.53 | 70.81  | 35.51  | 17.79 |
| P42932 | T-complex protein 1 subunit theta                                                        | 1405 | 20 | 448  | 364  | 0.2790 | 1.37 | 122 | 39.63  | 33.79  | 21.04  | 27.53  | 89  | 11.81 | 48.80  | 18.69  | 9.64  |
| Q923T9 | Calcium/calmodulin-dependent protein kinase type II subunit gamma                        | 249  | 3  | 141  | 1034 | 0.7355 | 1.37 | 36  | 11.01  | 15.60  | 1.11   | 7.99   | 26  | 3.94  | 13.40  | 6.54   | 2.22  |
| Q8BGT8 | Phytanoyl-CoA hydroxylase-interacting protein-like                                       | 278  | 4  | 107  | 777  | 0.4120 | 1.37 | 30  | 2.20   | 7.80   | 6.65   | 13.32  | 22  | 1.97  | 0.00   | 14.02  | 5.93  |
| P61316 | Heat shock 70 kDa protein 4                                                              | 1521 | 23 | 692  | 391  | 0.3766 | 1.37 | 211 | 66.04  | 50.68  | 29.90  | 63.93  | 154 | 31.50 | 56.45  | 40.18  | 25.95 |
| P48722 | Heat shock 70 kDa protein 4L                                                             | 1892 | 28 | 684  | 418  | 0.3968 | 1.37 | 182 | 55.04  | 36.39  | 34.33  | 55.94  | 133 | 11.81 | 53.58  | 36.45  | 31.13 |
| Q8COM9 | L-asparaginase                                                                           | 875  | 12 | 536  | 733  | 0.4848 | 1.36 | 134 | 30.82  | 40.29  | 49.84  | 13.32  | 99  | 25.60 | 2.87   | 44.86  | 25.20 |
| Q91V92 | ATP-citrate synthase                                                                     | 1465 | 21 | 451  | 498  | 0.4499 | 1.36 | 127 | 48.43  | 27.29  | 18.83  | 32.85  | 94  | 11.81 | 38.27  | 20.56  | 22.98 |
| Q4VAE3 | Transmembrane protein 65                                                                 | 342  | 6  | 136  | 555  | 0.1357 | 1.36 | 40  | 17.61  | 7.80   | 4.43   | 9.77   | 29  | 11.81 | 6.70   | 4.67   | 5.93  |
| P10922 | Histone H1.0                                                                             | 252  | 3  | 157  | 661  | 0.5332 | 1.36 | 60  | 19.81  | 18.19  | 15.51  | 6.22   | 44  | 7.88  | 13.40  | 9.35   | 13.34 |
| P12815 | Programmed cell death protein 6                                                          | 273  | 4  | 176  | 825  | 0.4599 | 1.36 | 45  | 6.60   | 10.40  | 14.40  | 13.32  | 33  | 9.84  | 10.53  | 0.00   | 12.60 |
| Q9CRB6 | Tubulin polymerization-promoting protein family member 3                                 | 208  | 3  | 251  | 481  | 0.2923 | 1.36 | 58  | 19.81  | 10.40  | 15.51  | 12.43  | 43  | 7.88  | 12.44  | 15.89  | 6.67  |
| Q62059 | Vesicular core protein                                                                   | 603  | 8  | 251  | 372  | 0.2723 | 1.35 | 92  | 19.81  | 27.29  | 17.72  | 27.53  | 68  | 15.75 | 17.22  | 23.36  | 11.86 |
| Q8BKZ9 | Pyruvate dehydrogenase protein X component, mitochondrial                                | 434  | 7  | 56   | 1253 | 0.6631 | 1.35 | 22  | 2.20   | 9.10   | 1.11   | 9.77   | 16  | 5.91  | 8.61   | 1.87   | 0.00  |
| Q99P72 | Reticulon-4                                                                              | 882  | 14 | 390  | 769  | 0.5211 | 1.35 | 104 | 24.22  | 27.29  | 39.87  | 12.43  | 77  | 31.50 | 8.61   | 12.15  | 24.46 |
| P31650 | Sodium- and chloride-dependent GABA transporter 3                                        | 214  | 3  | 188  | 754  | 0.3727 | 1.35 | 43  | 8.81   | 14.30  | 6.65   | 13.32  | 32  | 0.00  | 14.35  | 9.35   | 8.15  |
| P05063 | Fructose-bisphosphate aldolase C                                                         | 1610 | 21 | 1583 | 156  | 0.1154 | 1.35 | 495 | 134.29 | 132.56 | 109.65 | 118.10 | 366 | 86.63 | 96.64  | 118.68 | 64.49 |
| Q9Z140 | Copine-6                                                                                 | 711  | 11 | 122  | 813  | 0.4373 | 1.35 | 45  | 15.41  | 16.89  | 4.43   | 7.99   | 33  | 11.81 | 11.48  | 8.41   | 1.48  |
| Q8VD37 | SH3-containing GRB2-like protein 3-interacting protein 1                                 | 351  | 6  | 60   | 870  | 0.4904 | 1.34 | 18  | 2.20   | 7.80   | 5.54   | 2.66   | 14  | 9.84  | 0.00   | 0.00   | 3.71  |
| P62774 | Myotrophin                                                                               | 149  | 2  | 182  | 1169 | 0.5284 | 1.34 | 65  | 19.81  | 18.19  | 22.15  | 4.44   | 48  | 9.84  | 0.00   | 9.35   | 28.91 |
| Q9Z218 | Dipeptidyl aminopeptidase-like protein 6                                                 | 897  | 15 | 244  | 714  | 0.2975 | 1.34 | 65  | 15.41  | 16.89  | 9.97   | 23.09  | 49  | 3.94  | 19.14  | 9.35   | 16.31 |
| Q80TB8 | Synaptic vesicle membrane protein VAT-1 homolog-like                                     | 398  | 6  | 119  | 780  | 0.3910 | 1.34 | 30  | 6.60   | 7.80   | 5.54   | 9.77   | 22  | 1.97  | 8.61   | 9.35   | 2.22  |
| Q9JKL4 | NADH dehydrogenase [ubiquinone] 1 alpha subcomplex assembly factor 1                     | 237  | 4  | 82   | 835  | 0.4534 | 1.34 | 20  | 4.40   | 5.20   | 7.75   | 2.66   | 15  | 3.94  | 0.00   | 6.54   | 4.45  |
| Q91VT4 | Carbonyl reductase family member 4                                                       | 175  | 3  | 16   | 1434 | 0.8096 | 1.34 | 8   | 6.60   | 0.00   | 1.11   | 0.00   | 6   | 1.97  | 1.91   | 1.87   | 0.00  |
| P97822 | Acidic leucine-rich nuclear phosphoprotein 32 family member E                            | 338  | 5  | 81   | 303  | 0.0684 | 1.34 | 20  | 4.40   | 6.50   | 3.32   | 6.22   | 15  | 3.94  | 5.74   | 1.87   | 3.71  |
| P19536 | Cytochrome c oxidase subunit 5B, mitochondrial                                           | 244  | 4  | 410  | 697  | 0.4086 | 1.34 | 147 | 33.02  | 41.59  | 44.30  | 28.41  | 110 | 39.38 | 0.00   | 22.43  | 48.18 |
| P16388 | Potassium voltage-gated channel subfamily A member 1                                     | 193  | 2  | 17   | 1534 | 0.8546 | 1.34 | 9   | 0.00   | 6.50   | 0.00   | 2.66   | 7   | 5.91  | 0.00   | 0.93   | 0.00  |
| Q8BMF4 | Dihydropolyllysine-residue acetyltransferase component of pyruvate dehydrogenase complex | 1192 | 17 | 878  | 486  | 0.2718 | 1.34 | 260 | 66.04  | 66.28  | 66.45  | 61.27  | 195 | 17.72 | 90.90  | 53.27  | 32.62 |
| O88456 | Calpain small subunit 1                                                                  | 300  | 4  | 150  | 1041 | 0.7128 | 1.34 | 45  | 13.21  | 3.90   | 22.15  | 6.22   | 34  | 15.75 | 8.61   | 3.74   | 5.93  |
| Q8JZQ9 | Eukaryotic translation initiation factor 3 subunit B                                     | 279  | 4  | 92   | 539  | 0.0900 | 1.33 | 28  | 2.20   | 9.10   | 5.54   | 11.54  | 21  | 1.97  | 7.65   | 2.80   | 8.90  |
| Q9CQH3 | NADH dehydrogenase [ubiquinone] 1 beta subcomplex subunit 5, mitochondrial               | 274  | 4  | 221  | 1142 | 0.4672 | 1.33 | 54  | 11.01  | 11.70  | 24.37  | 7.10   | 41  | 11.81 | 0.00   | 7.48   | 21.50 |
| Q8BW75 | Amine oxidase [flavin-containing] B                                                      | 391  | 6  | 48   | 982  | 0.6176 | 1.33 | 20  | 2.20   | 18.19  | 0.00   | 0.00   | 15  | 7.88  | 1.91   | 1.87   | 3.71  |
| Q61207 | Sulfated glycoprotein 1                                                                  | 552  | 8  | 145  | 1057 | 0.8885 | 1.32 | 81  | 19.81  | 32.49  | 28.80  | 0.00   | 61  | 19.69 | 0.00   | 25.23  | 16.31 |
| O54983 | Mu-crystallin homolog                                                                    | 775  | 11 | 424  | 288  | 0.1433 | 1.32 | 120 | 28.62  | 22.09  | 33.23  | 36.41  | 91  | 23.63 | 8.61   | 28.97  | 29.65 |
| P50114 | Protein S100-B                                                                           | 138  | 2  | 104  | 837  | 0.4407 | 1.32 | 51  | 8.81   | 14.30  | 23.26  | 4.44   | 38  | 1.97  | 0.00   | 7.48   | 28.91 |
| Q9D819 | Inorganic pyrophosphatase                                                                | 586  | 8  | 252  | 1140 | 0.4614 | 1.32 | 56  | 13.21  | 19.49  | 9.97   | 13.32  | 42  | 13.78 | 0.00   | 19.63  | 8.90  |
| P63005 | Platelet-activating factor acetylhydrolase 1B subunit alpha                              | 577  | 8  | 165  | 749  | 0.6428 | 1.32 | 44  | 13.21  | 9.10   | 4.43   | 16.87  | 33  | 9.84  | 7.65   | 10.28  | 5.19  |
| O35633 | Vesicular inhibitory amino acid transporter                                              | 195  | 3  | 85   | 1172 |        |      |     |        |        |        |        |     |       |        |        |       |

|        |                                                                   |      |    |      |      |        |      |      |        |        |        |        |     |        |        |        |        |
|--------|-------------------------------------------------------------------|------|----|------|------|--------|------|------|--------|--------|--------|--------|-----|--------|--------|--------|--------|
| Q91WS0 | CDGSH iron-sulfur domain-containing protein 1                     | 451  | 7  | 274  | 1022 | 0.4328 | 1.29 | 107  | 26.42  | 28.59  | 36.55  | 15.09  | 83  | 37.41  | 0.00   | 11.21  | 34.10  |
| Q99LR1 | Monoacylglycerol lipase ABHD12                                    | 155  | 3  | 11   | 1491 | 0.6687 | 1.29 | 7    | 4.40   | 1.30   | 0.00   | 1.78   | 6   | 3.94   | 0.00   | 1.87   | 0.00   |
| P40336 | Vacuolar protein sorting-associated protein 26A                   | 165  | 3  | 15   | 1428 | 0.7149 | 1.29 | 7    | 0.00   | 2.60   | 2.22   | 2.66   | 6   | 3.94   | 0.00   | 1.87   | 0.00   |
| Q9DCD0 | 6-phosphogluconate dehydrogenase, decarboxylating                 | 397  | 6  | 115  | 605  | 0.3881 | 1.29 | 36   | 8.81   | 7.80   | 11.08  | 7.99   | 28  | 5.91   | 13.40  | 8.41   | 0.00   |
| P58389 | Serine/threonine-protein phosphatase 2A activator                 | 329  | 5  | 142  | 1224 | 0.5416 | 1.29 | 35   | 11.01  | 10.40  | 3.32   | 10.66  | 28  | 5.91   | 0.00   | 14.95  | 6.67   |
| P63325 | 40S ribosomal protein S10                                         | 282  | 4  | 145  | 675  | 0.4818 | 1.29 | 36   | 11.01  | 3.90   | 14.40  | 7.10   | 28  | 5.91   | 3.83   | 7.48   | 11.12  |
| Q61699 | Heat shock protein 105 kDa                                        | 1149 | 17 | 478  | 678  | 0.3332 | 1.28 | 112  | 26.42  | 33.79  | 21.04  | 31.08  | 88  | 3.94   | 43.06  | 16.82  | 23.72  |
| P97450 | ATP synthase-coupling factor 6, mitochondrial                     | 401  | 6  | 145  | 1094 | 0.8885 | 1.28 | 82   | 24.22  | 24.69  | 33.23  | 0.00   | 64  | 13.78  | 0.00   | 28.04  | 22.24  |
| O55013 | Trafficking protein particle complex subunit 3                    | 380  | 6  | 85   | 910  | 0.4773 | 1.28 | 20   | 4.40   | 3.90   | 7.75   | 4.44   | 16  | 7.88   | 4.78   | 1.87   | 1.48   |
| P32921 | Tryptophanyl-tRNA synthetase, cytoplasmic                         | 381  | 6  | 73   | 1222 | 0.5298 | 1.27 | 19   | 6.60   | 5.20   | 2.22   | 5.33   | 15  | 1.97   | 5.74   | 7.48   | 0.00   |
| Q8BP47 | Asparaginyl-tRNA synthetase, cytoplasmic                          | 570  | 9  | 181  | 1149 | 0.4260 | 1.27 | 47   | 11.01  | 16.89  | 7.75   | 11.54  | 37  | 5.91   | 13.40  | 17.76  | 0.00   |
| P48320 | Glutamate decarboxylase 2                                         | 640  | 9  | 251  | 583  | 0.4784 | 1.27 | 68   | 13.21  | 15.60  | 12.18  | 26.64  | 53  | 9.84   | 22.96  | 12.15  | 8.15   |
| Q2NL51 | Glycogen synthase kinase-3 alpha                                  | 305  | 4  | 91   | 1215 | 0.9147 | 1.27 | 30   | 2.20   | 14.30  | 3.32   | 10.66  | 24  | 9.84   | 5.74   | 4.67   | 3.71   |
| P62305 | Small nuclear ribonucleoprotein E                                 | 227  | 3  | 66   | 1266 | 0.5693 | 1.27 | 32   | 11.01  | 9.10   | 8.86   | 2.66   | 25  | 3.94   | 0.00   | 8.41   | 12.60  |
| Q61753 | D-3-phosphoglycerate dehydrogenase                                | 780  | 10 | 327  | 865  | 0.5456 | 1.27 | 81   | 28.62  | 24.69  | 7.75   | 19.53  | 64  | 9.84   | 31.58  | 14.02  | 8.15   |
| Q8R3V5 | Endophilin-B2                                                     | 327  | 5  | 46   | 1402 | 0.8795 | 1.27 | 15   | 0.00   | 3.90   | 6.65   | 4.44   | 12  | 1.97   | 6.70   | 0.93   | 2.22   |
| Q99KP6 | Pre-mRNA-processing factor 19                                     | 179  | 3  | 30   | 1337 | 0.4683 | 1.27 | 10   | 2.20   | 2.60   | 2.22   | 2.66   | 8   | 1.97   | 2.87   | 2.80   | 0.00   |
| P09528 | Ferritin heavy chain                                              | 281  | 5  | 179  | 681  | 0.4669 | 1.27 | 42   | 15.41  | 6.50   | 8.86   | 11.54  | 33  | 7.88   | 8.61   | 10.28  | 6.67   |
| Q3UUG6 | TBC1 domain family member 24                                      | 195  | 3  | 31   | 1521 | 0.8606 | 1.27 | 9    | 0.00   | 3.90   | 1.11   | 3.55   | 7   | 3.94   | 0.96   | 1.87   | 0.00   |
| Q3TDK6 | Protein rogdi homolog                                             | 545  | 9  | 129  | 557  | 0.3035 | 1.26 | 33   | 11.01  | 7.80   | 4.43   | 9.77   | 26  | 7.88   | 6.70   | 5.61   | 5.93   |
| Q9CQ60 | 6-phosphogluconolactonase                                         | 378  | 5  | 134  | 1401 | 0.8723 | 1.26 | 37   | 8.81   | 3.90   | 19.94  | 4.44   | 29  | 3.94   | 10.53  | 7.48   | 7.41   |
| Q9QZQ8 | Core histone macro-H2A.1                                          | 398  | 6  | 171  | 298  | 0.0984 | 1.26 | 69   | 6.60   | 19.49  | 25.47  | 17.76  | 55  | 5.91   | 16.27  | 22.43  | 10.38  |
| Q62188 | Dihydropyrimidinase-related protein 3                             | 1008 | 16 | 364  | 844  | 0.5190 | 1.26 | 98   | 26.42  | 32.49  | 11.08  | 28.41  | 78  | 15.75  | 36.36  | 21.49  | 4.45   |
| Q99K85 | Phosphoserine aminotransferase                                    | 1130 | 16 | 420  | 629  | 0.2335 | 1.26 | 132  | 37.42  | 33.79  | 35.44  | 24.86  | 104 | 21.66  | 24.88  | 46.73  | 11.12  |
| P26043 | Radixin                                                           | 117  | 2  | 22   | 1549 | 0.8581 | 1.26 | 5    | 0.00   | 3.90   | 0.00   | 0.89   | 4   | 0.00   | 2.87   | 0.93   | 0.00   |
| Q3UM45 | Protein phosphatase 1 regulatory subunit 7                        | 698  | 10 | 105  | 612  | 0.3713 | 1.26 | 38   | 11.01  | 10.40  | 7.75   | 8.88   | 30  | 13.78  | 0.96   | 14.02  | 1.48   |
| P46097 | Synaptotagmin-2                                                   | 502  | 7  | 176  | 797  | 0.4620 | 1.26 | 72   | 19.81  | 23.39  | 11.08  | 17.76  | 57  | 7.88   | 21.05  | 22.43  | 5.93   |
| Q8CBY8 | Dynactin subunit 4                                                | 241  | 4  | 32   | 671  | 0.1726 | 1.25 | 15   | 6.60   | 5.20   | 1.11   | 1.78   | 12  | 7.88   | 3.83   | 0.00   | 0.00   |
| P28738 | Kinesin heavy chain isoform 5C                                    | 504  | 8  | 74   | 722  | 0.2284 | 1.25 | 22   | 8.81   | 7.80   | 2.22   | 3.55   | 18  | 3.94   | 11.48  | 0.93   | 1.48   |
| Q99N96 | 39S ribosomal protein L1, mitochondrial                           | 171  | 3  | 17   | 1545 | 0.8227 | 1.25 | 6    | 2.20   | 3.90   | 0.00   | 0.00   | 5   | 3.94   | 0.00   | 0.93   | 0.00   |
| Q61RU5 | Clathrin light chain B                                            | 197  | 3  | 144  | 595  | 0.3339 | 1.25 | 37   | 13.21  | 7.80   | 8.86   | 7.10   | 30  | 7.88   | 11.48  | 6.54   | 3.71   |
| P51174 | Long-chain specific acyl-CoA dehydrogenase, mitochondrial         | 433  | 7  | 97   | 1236 | 0.5081 | 1.24 | 38   | 11.01  | 9.10   | 4.43   | 13.32  | 31  | 11.81  | 2.87   | 15.89  | 0.00   |
| P63040 | Complexin-1                                                       | 317  | 5  | 264  | 1018 | 0.3876 | 1.24 | 68   | 15.41  | 23.39  | 17.72  | 11.54  | 55  | 29.53  | 2.87   | 19.63  | 2.97   |
| Q9QY76 | Vesicle-associated membrane protein-associated protein B          | 278  | 4  | 107  | 1184 | 0.8354 | 1.24 | 32   | 11.01  | 7.80   | 11.08  | 1.78   | 26  | 7.88   | 7.65   | 5.61   | 4.45   |
| P23819 | Glutamate receptor 2                                              | 586  | 10 | 80   | 803  | 0.3144 | 1.24 | 30   | 11.01  | 6.50   | 5.54   | 7.10   | 24  | 9.84   | 1.91   | 3.74   | 8.90   |
| Q91V12 | Cytosolic acyl coenzyme A thioester hydrolase                     | 793  | 11 | 505  | 805  | 0.5017 | 1.24 | 138  | 22.01  | 44.19  | 25.47  | 46.17  | 112 | 15.75  | 32.53  | 51.40  | 11.86  |
| P84086 | Complexin-2                                                       | 171  | 3  | 160  | 659  | 0.4098 | 1.24 | 35   | 6.60   | 7.80   | 7.75   | 13.32  | 29  | 7.88   | 6.70   | 7.48   | 6.67   |
| P63323 | 40S ribosomal protein S12                                         | 210  | 4  | 66   | 1515 | 0.7779 | 1.24 | 9    | 2.20   | 3.90   | 0.00   | 2.66   | 7   | 3.94   | 0.00   | 0.93   | 2.22   |
| Q9Z1B3 | 1-phosphatidylinositol-4,5-bisphosphate phosphodiesterase beta-1  | 1806 | 28 | 567  | 819  | 0.5187 | 1.23 | 142  | 46.23  | 36.39  | 17.72  | 41.73  | 115 | 13.78  | 24.88  | 25.23  | 51.15  |
| P52480 | Pyruvate kinase isozymes M1/M2                                    | 3023 | 40 | 4363 | 257  | 0.1393 | 1.23 | 1172 | 261.97 | 330.10 | 302.37 | 277.93 | 950 | 167.36 | 369.34 | 204.66 | 209.05 |
| Q9QYCO | Alpha-adducin                                                     | 753  | 11 | 392  | 586  | 0.4412 | 1.23 | 106  | 26.42  | 38.99  | 23.26  | 17.76  | 86  | 19.69  | 22.01  | 18.69  | 25.95  |
| O88544 | COP9 signalosome complex subunit 4                                | 480  | 7  | 75   | 1288 | 0.5667 | 1.23 | 24   | 4.40   | 9.10   | 3.32   | 7.10   | 19  | 7.88   | 0.00   | 9.35   | 2.22   |
| P42125 | 3,2-trans-enoyl-CoA isomerase, mitochondrial                      | 413  | 6  | 136  | 592  | 0.3750 | 1.23 | 37   | 8.81   | 7.80   | 8.86   | 11.54  | 30  | 7.88   | 9.57   | 7.48   | 5.19   |
| Q8CHP8 | Phosphoglycolate phosphatase                                      | 278  | 4  | 114  | 732  | 0.4975 | 1.23 | 26   | 11.01  | 6.50   | 4.43   | 4.44   | 21  | 3.94   | 0.00   | 13.08  | 4.45   |
| Q3TC72 | Fumarylacetoacetate hydrolase domain-containing protein 2A        | 402  | 6  | 126  | 745  | 0.5147 | 1.23 | 32   | 11.01  | 5.20   | 5.54   | 9.77   | 26  | 7.88   | 3.83   | 10.28  | 3.71   |
| Q9Z219 | Succinyl-CoA ligase [ADP-forming] subunit beta, mitochondrial     | 1001 | 14 | 481  | 778  | 0.4049 | 1.22 | 134  | 35.22  | 27.29  | 28.80  | 42.62  | 109 | 29.53  | 14.35  | 47.66  | 17.79  |
| P58281 | Dynamin-like 120 kDa protein, mitochondrial                       | 1486 | 22 | 369  | 748  | 0.6753 | 1.22 | 118  | 30.82  | 38.99  | 9.97   | 38.18  | 96  | 13.78  | 32.53  | 19.63  | 30.39  |
| Q91ZR1 | Ras-related protein Rab-4B                                        | 272  | 4  | 43   | 784  | 0.2752 | 1.22 | 14   | 6.60   | 2.60   | 3.32   | 1.78   | 12  | 7.88   | 2.87   | 0.93   | 0.00   |
| O88487 | Cytoplasmic dynein 1 intermediate chain 2                         | 490  | 8  | 99   | 930  | 0.7674 | 1.22 | 28   | 2.20   | 7.80   | 7.75   | 9.77   | 22  | 5.91   | 7.65   | 3.74   | 5.19   |
| O54879 | High mobility group protein B3                                    | 204  | 3  | 74   | 647  | 0.3791 | 1.22 | 20   | 4.40   | 3.90   | 4.43   | 7.10   | 16  | 5.91   | 2.87   | 3.74   | 3.71   |
| P17427 | AP-2 complex subunit alpha-2                                      | 1898 | 29 | 760  | 587  | 0.5697 | 1.22 | 227  | 79.25  | 50.68  | 39.87  | 56.83  | 186 | 23.63  | 52.63  | 62.61  | 47.44  |
| P53026 | 60S ribosomal protein L10a                                        | 228  | 4  | 36   | 1340 | 0.6746 | 1.21 | 15   | 8.81   | 2.60   | 1.11   | 2.66   | 12  | 5.91   | 1.91   | 4.67   | 0.00   |
| P62631 | Elongation factor 1-alpha 2                                       | 407  | 6  | 491  | 703  | 0.6514 | 1.21 | 148  | 15.41  | 41.59  | 39.87  | 51.50  | 122 | 29.53  | 44.97  | 15.89  | 31.88  |
| P56380 | Bis(5'-nucleosyl)-tetraphosphatase [asymmetrical]                 | 303  | 5  | 93   | 615  | 0.3889 | 1.21 | 14   | 4.40   | 3.90   | 3.32   | 2.66   | 12  | 7.88   | 0.96   | 0.00   | 2.97   |
| P61979 | Heterogeneous nuclear ribonucleoprotein K                         | 610  | 8  | 659  | 508  | 0.3780 | 1.21 | 171  | 37.42  | 55.88  | 44.30  | 33.74  | 142 | 15.75  | 45.93  | 31.77  | 48.18  |
| Q9QYJ0 | DnaJ homolog subfamily A member 2                                 | 157  | 2  | 26   | 1020 | 0.5274 | 1.21 | 13   | 4.40   | 5.20   | 1.11   | 2.66   | 11  | 1.97   | 5.74   | 1.87   | 1.48   |
| O08788 | Dynactin subunit 1                                                | 1633 | 24 | 490  | 944  | 0.5628 | 1.21 | 109  | 30.82  | 40.29  | 15.51  | 22.20  | 90  | 5.91   | 31.58  | 21.49  | 31.13  |
| Q02053 | Ubiquitin-like modifier-activating enzyme 1                       | 2517 | 32 | 1658 | 381  | 0.2918 | 1.21 | 463  | 114.47 | 126.06 | 99.68  | 122.54 | 383 | 53.16  | 146.40 | 89.71  | 94.15  |
| Q99JP6 | Homer protein homolog 3                                           | 199  | 3  | 21   | 1529 | 0.9081 | 1.21 | 9    | 0.00   | 2.60   | 5.54   | 0.89   | 7   | 3.94   | 0.00   | 2.80   | 0.74   |
| P08228 | Superoxide dismutase [Cu-Zn]                                      | 302  | 4  | 443  | 491  | 0.2829 | 1.21 | 116  | 28.62  | 27.29  | 32.12  | 28.41  | 97  | 35.44  | 17.22  | 18.69  | 25.20  |
| Q922Q1 | MOSC domain-containing protein 2, mitochondrial                   | 201  | 3  | 18   | 1558 | 0.8788 | 1.21 | 7    | 4.40   | 2.60   | 0.00   | 0.00   | 6   | 3.94   | 0.00   | 1.87   | 0.00   |
| Q61644 | Protein kinase C and casein kinase substrate in neurons protein 1 | 1164 | 17 | 787  | 420  | 0.3411 | 1.20 | 214  | 52.83  | 54.58  | 45.41  | 61.27  | 178 | 45.29  | 71.76  | 32.71  | 28.17  |
| Q9CWZ3 | RNA-binding protein 8A                                            | 271  | 4  | 71   | 1134 | 0.3272 | 1.20 | 25   | 6.60   | 3.90   | 8.86   | 5.33   | 21  | 11.81  | 0.96   | 5.61   | 2.22   |
| O88741 | Ganglioside-induced differentiation-associated protein 1          | 293  | 4  | 103  | 729  | 0.4630 | 1.20 | 36   | 11.01  | 7.80   | 9.97   | 7.10   | 30  | 3.94   | 11.48  | 9.35   | 5.19   |
| Q8JZW4 | Copine-5                                                          | 117  | 2  | 19   | 1468 | 0.2210 | 1.20 | 4    | 2.20   | 1.30   | 0.00   | 0.00   | 3   | 1.97   | 0.96   | 0.00   | 0.00   |
| Q9CR98 | Protein FAM136A                                                   | 244  | 3  | 39   | 1480 | 0.5145 | 1.20 | 9    | 4.40   | 2.60   | 2.22   | 0.00   | 8   | 1.97   | 5.74   | 0.00   | 0.00   |
| P20917 | Myelin-associated glycoprotein                                    | 548  | 8  | 388  | 659  | 0.4990 | 1.20 | 112  | 22.01  | 24.69  | 19.94  | 45.28  | 94  | 13.78  | 27.75  | 26.17  | 25.95  |
| Q6X893 | Choline transporter-like protein 1                                | 280  | 4  | 167  | 817  | 0.7415 | 1.19 | 65   | 28.62  | 14.30  | 9.97   | 12.43  | 55  | 7.88   | 18.18  | 13.08  | 15.57  |
| Q9WTT4 | V-type proton ATPase subunit G 2                                  | 749  | 10 | 403  | 918  | 0.5281 | 1.19 | 100  | 26.42  | 24.69  | 35.44  | 13.32  | 84  | 37.41  | 4.78   | 21.49  | 20.02  |
| Q68FL4 | Putative adenosylhomocysteinase 3                                 | 271  | 5  | 55   | 1420 | 0.8474 | 1.19 | 14   | 0.00   | 2.60   | 6.65   | 4.44   | 11  | 1.97   | 6.70   | 2.80   | 0.00   |
| Q91YR1 | Twinfilin-1                                                       | 210  | 3  | 33   | 1162 | 0.7025 | 1.19 | 10   | 4.40   | 2.60   | 2.22   | 0.89   | 8   | 1.97   | 0.00   | 2.80   | 3.71   |
| Q3UGR5 | Haloacid dehalogenase-like hydrolase domain-containing protein 2  | 413  | 7  | 181  | 584  | 0.2579 | 1.19 | 46   | 11.01  | 16.89  | 12.18  | 6.22   | 39  | 11.81  | 15.31  | 6.54   | 5.19   |
| Q9DCC4 | Pyruvate-5-carboxylate reductase 3                                | 147  | 2  | 20   | 1380 | 0.4603 | 1.19 | 6    | 2.20   | 1.30   | 1.11   | 1.7    |     |        |        |        |        |

|        |                                                                 |      |    |      |      |        |      |      |        |        |        |        |     |        |        |        |        |
|--------|-----------------------------------------------------------------|------|----|------|------|--------|------|------|--------|--------|--------|--------|-----|--------|--------|--------|--------|
| O54829 | Regulator of G-protein signaling 7                              | 197  | 3  | 21   | 1550 | 0.7192 | 1.16 | 10   | 2.20   | 7.80   | 0.00   | 0.00   | 9   | 1.97   | 5.74   | 0.93   | 0.00   |
| P70168 | Importin subunit beta-1                                         | 1130 | 17 | 323  | 795  | 0.3586 | 1.16 | 81   | 17.61  | 19.49  | 12.18  | 31.97  | 70  | 7.88   | 32.53  | 4.67   | 25.20  |
| Q91V14 | Solute carrier family 12 member 5                               | 682  | 10 | 702  | 942  | 0.5591 | 1.16 | 185  | 48.43  | 41.59  | 32.12  | 63.04  | 160 | 11.81  | 64.11  | 42.05  | 42.25  |
| P97351 | 40S ribosomal protein S3a                                       | 281  | 5  | 101  | 861  | 0.5680 | 1.16 | 34   | 13.21  | 6.50   | 5.54   | 8.88   | 30  | 7.88   | 9.57   | 4.67   | 7.41   |
| Q9QZ59 | Doublesex- and mab-3-related transcription factor 1             | 153  | 3  | 69   | 1444 | 0.8691 | 1.15 | 16   | 0.00   | 7.80   | 3.32   | 5.33   | 14  | 1.97   | 6.70   | 1.87   | 3.71   |
| P14131 | 40S ribosomal protein S16                                       | 254  | 4  | 156  | 1265 | 0.8227 | 1.15 | 37   | 8.81   | 9.10   | 15.51  | 3.55   | 32  | 11.81  | 3.83   | 7.48   | 8.90   |
| P14231 | Sodium/potassium-transporting ATPase subunit beta-2             | 446  | 6  | 657  | 348  | 0.2553 | 1.15 | 199  | 59.44  | 50.68  | 44.30  | 44.40  | 172 | 43.32  | 45.93  | 50.46  | 32.62  |
| O35295 | Transcriptional activator protein Pur-beta                      | 352  | 5  | 104  | 1009 | 0.4485 | 1.15 | 25   | 2.20   | 5.20   | 7.75   | 9.77   | 22  | 1.97   | 1.91   | 14.02  | 3.71   |
| Q9Z0P5 | Twinfilin-2                                                     | 195  | 3  | 73   | 672  | 0.3315 | 1.15 | 17   | 2.20   | 6.50   | 5.54   | 2.66   | 15  | 0.00   | 3.83   | 9.35   | 1.48   |
| P12382 | 6-phosphofructokinase, liver type                               | 813  | 12 | 302  | 817  | 0.3729 | 1.15 | 60   | 13.21  | 18.19  | 11.08  | 17.76  | 52  | 9.84   | 25.83  | 8.41   | 8.15   |
| P51880 | Fatty acid-binding protein, brain                               | 484  | 6  | 167  | 1219 | 0.7444 | 1.15 | 30   | 8.81   | 14.30  | 4.43   | 2.66   | 26  | 9.84   | 0.00   | 7.48   | 8.90   |
| O35129 | Prohibitin-2                                                    | 854  | 12 | 433  | 686  | 0.5370 | 1.15 | 131  | 50.63  | 19.49  | 32.12  | 28.41  | 113 | 29.53  | 16.27  | 22.43  | 45.22  |
| Q8R164 | Valacyclovir hydrolase                                          | 490  | 8  | 132  | 1063 | 0.4980 | 1.15 | 36   | 11.01  | 9.10   | 8.86   | 7.10   | 31  | 7.88   | 14.35  | 0.93   | 8.15   |
| P50247 | Adenosylhomocysteinase                                          | 458  | 7  | 147  | 1216 | 0.7413 | 1.15 | 38   | 11.01  | 7.80   | 3.32   | 15.98  | 33  | 1.97   | 14.35  | 13.08  | 3.71   |
| Q8R001 | Microtubule-associated protein RP/EB family member 2            | 380  | 6  | 147  | 1126 | 0.5636 | 1.15 | 34   | 11.01  | 11.70  | 5.54   | 6.22   | 30  | 11.81  | 3.83   | 12.15  | 2.22   |
| Q61361 | Brevican core protein                                           | 632  | 9  | 567  | 527  | 0.2628 | 1.15 | 113  | 19.81  | 40.29  | 25.47  | 27.53  | 99  | 13.78  | 35.40  | 16.82  | 32.62  |
| Q99LD4 | COP9 signalosome complex subunit 1                              | 186  | 3  | 26   | 1453 | 0.9039 | 1.15 | 11   | 6.60   | 2.60   | 0.00   | 1.78   | 10  | 1.97   | 5.74   | 1.87   | 0.00   |
| P63038 | 60 kDa heat shock protein, mitochondrial                        | 2658 | 36 | 1530 | 280  | 0.0810 | 1.15 | 448  | 125.48 | 157.25 | 74.21  | 91.46  | 392 | 100.42 | 137.79 | 74.76  | 78.58  |
| P47857 | 6-phosphofructokinase, muscle type                              | 1964 | 27 | 943  | 648  | 0.5648 | 1.14 | 249  | 57.24  | 70.18  | 44.30  | 77.25  | 218 | 39.38  | 76.55  | 65.42  | 36.32  |
| P83940 | Transcription elongation factor B polypeptide 1                 | 293  | 4  | 97   | 1099 | 0.5328 | 1.14 | 35   | 8.81   | 7.80   | 13.29  | 5.33   | 31  | 11.81  | 0.00   | 9.35   | 9.64   |
| Q6PH08 | ERC protein 2                                                   | 148  | 2  | 14   | 1540 | 0.6311 | 1.14 | 2    | 0.00   | 1.30   | 0.00   | 0.89   | 2   | 0.00   | 1.91   | 0.00   | 0.00   |
| Q9WUA3 | 6-phosphofructokinase type C                                    | 1579 | 22 | 759  | 867  | 0.5509 | 1.14 | 195  | 41.83  | 48.09  | 33.23  | 71.92  | 171 | 9.84   | 66.98  | 53.27  | 40.77  |
| Q9CQN3 | Mitochondrial import receptor subunit TOM6 homolog              | 141  | 2  | 19   | 1419 | 0.7591 | 1.14 | 12   | 4.40   | 5.20   | 2.22   | 0.00   | 10  | 5.91   | 0.00   | 0.00   | 4.45   |
| P09411 | Phosphoglycerate kinase 1                                       | 1289 | 17 | 1178 | 806  | 0.4841 | 1.14 | 306  | 81.45  | 53.28  | 77.53  | 93.23  | 268 | 74.82  | 41.14  | 114.95 | 37.07  |
| O88569 | Heterogeneous nuclear ribonucleoproteins A2/B1                  | 977  | 12 | 490  | 720  | 0.5633 | 1.14 | 140  | 30.82  | 41.59  | 35.44  | 31.97  | 123 | 43.32  | 12.44  | 37.38  | 29.65  |
| O54962 | Barrier-to-autointegration factor                               | 243  | 3  | 61   | 1493 | 0.9099 | 1.14 | 28   | 0.00   | 11.70  | 15.51  | 0.89   | 25  | 3.94   | 0.96   | 2.80   | 17.05  |
| Q9D6F9 | Tubulin beta-4 chain                                            | 903  | 12 | 2703 | 361  | 0.2441 | 1.13 | 812  | 180.52 | 175.45 | 206.01 | 250.40 | 716 | 171.30 | 189.46 | 151.39 | 203.86 |
| P08030 | Adenine phosphoribosyltransferase                               | 268  | 4  | 19   | 1556 | 0.7434 | 1.13 | 6    | 2.20   | 0.00   | 3.32   | 0.00   | 5   | 3.94   | 0.00   | 0.93   | 0.00   |
| P10126 | Elongation factor 1-alpha 1                                     | 408  | 6  | 604  | 1001 | 0.9840 | 1.13 | 161  | 13.21  | 44.19  | 49.84  | 54.16  | 142 | 39.38  | 39.23  | 28.97  | 34.84  |
| Q8BLJ3 | PI-PLC X domain-containing protein 3                            | 251  | 4  | 35   | 1306 | 0.4959 | 1.13 | 10   | 2.20   | 1.30   | 3.32   | 3.55   | 9   | 3.94   | 0.00   | 3.74   | 1.48   |
| P63054 | Purkinje cell protein 4                                         | 260  | 4  | 71   | 1276 | 0.4401 | 1.13 | 17   | 4.40   | 3.90   | 8.86   | 0.00   | 15  | 3.94   | 0.00   | 11.21  | 0.00   |
| Q8BWF0 | Succinate-semialdehyde dehydrogenase, mitochondrial             | 1067 | 17 | 420  | 991  | 0.6080 | 1.13 | 126  | 35.22  | 33.79  | 19.94  | 37.29  | 112 | 25.60  | 44.02  | 34.58  | 7.41   |
| Q61301 | Catenin alpha-2                                                 | 986  | 15 | 198  | 828  | 0.5010 | 1.13 | 49   | 11.01  | 16.89  | 7.75   | 13.32  | 43  | 7.88   | 9.57   | 7.48   | 18.53  |
| Q05920 | Pyruvate carboxylase, mitochondrial                             | 1592 | 24 | 587  | 948  | 0.8971 | 1.12 | 153  | 55.04  | 46.79  | 9.97   | 40.85  | 136 | 9.84   | 41.14  | 45.79  | 39.29  |
| P61022 | Calcium-binding protein p22                                     | 199  | 3  | 45   | 952  | 0.6612 | 1.12 | 15   | 4.40   | 2.60   | 4.43   | 3.55   | 13  | 3.94   | 4.78   | 0.93   | 3.71   |
| Q9Z329 | Inositol 1,4,5-trisphosphate receptor type 2                    | 111  | 2  | 49   | 1344 | 0.9537 | 1.12 | 13   | 0.00   | 1.30   | 7.75   | 4.44   | 12  | 0.00   | 4.78   | 2.80   | 4.45   |
| P62806 | Histone H4                                                      | 709  | 9  | 1784 | 851  | 0.5239 | 1.12 | 577  | 127.68 | 146.86 | 211.55 | 90.57  | 515 | 165.39 | 4.78   | 135.51 | 209.05 |
| Q3ULJ0 | Glycerol-3-phosphate dehydrogenase 1-like protein               | 419  | 5  | 101  | 1346 | 0.5503 | 1.12 | 26   | 8.81   | 7.80   | 4.43   | 5.33   | 24  | 11.81  | 0.00   | 6.54   | 5.19   |
| Q8VEK3 | Heterogeneous nuclear ribonucleoprotein U                       | 699  | 10 | 354  | 932  | 0.7900 | 1.12 | 111  | 15.41  | 35.09  | 26.58  | 33.74  | 99  | 27.57  | 25.83  | 25.23  | 20.76  |
| Q6PIE5 | Sodium/potassium-transporting ATPase subunit alpha-2            | 2057 | 28 | 3975 | 563  | 0.4391 | 1.11 | 1066 | 270.78 | 257.32 | 239.24 | 298.35 | 956 | 189.02 | 343.51 | 210.27 | 213.50 |
| Q9CXS4 | Centromere protein V                                            | 369  | 5  | 144  | 1046 | 0.7822 | 1.11 | 38   | 15.41  | 7.80   | 8.86   | 6.22   | 34  | 5.91   | 12.44  | 9.35   | 6.67   |
| Q62348 | Translin                                                        | 384  | 6  | 107  | 1473 | 0.9997 | 1.11 | 25   | 13.21  | 1.30   | 4.43   | 6.22   | 23  | 7.88   | 6.70   | 6.54   | 1.48   |
| P84084 | ADP-ribosylation factor 5                                       | 211  | 4  | 48   | 768  | 0.4247 | 1.11 | 16   | 4.40   | 3.90   | 5.54   | 1.78   | 14  | 11.81  | 0.00   | 0.00   | 2.22   |
| Q8BP92 | Reticulocalbin-2                                                | 233  | 4  | 39   | 1450 | 0.8498 | 1.11 | 15   | 0.00   | 6.50   | 1.11   | 7.10   | 13  | 3.94   | 5.74   | 2.80   | 0.74   |
| Q9WV85 | Nucleoside diphosphate kinase 3                                 | 239  | 4  | 58   | 1441 | 0.8059 | 1.11 | 10   | 4.40   | 3.90   | 0.00   | 1.78   | 9   | 5.91   | 0.00   | 0.93   | 2.22   |
| P15105 | Glutamine synthetase                                            | 998  | 13 | 1353 | 683  | 0.5927 | 1.11 | 349  | 57.24  | 67.58  | 116.29 | 107.44 | 314 | 82.70  | 47.84  | 128.96 | 54.12  |
| Q8BP67 | 60S ribosomal protein L24                                       | 338  | 5  | 140  | 1279 | 0.7870 | 1.11 | 43   | 22.01  | 7.80   | 6.65   | 6.22   | 38  | 13.78  | 9.57   | 12.15  | 2.97   |
| P28661 | Septin-4                                                        | 339  | 5  | 106  | 1049 | 0.7782 | 1.11 | 36   | 4.40   | 11.70  | 8.86   | 10.66  | 32  | 7.88   | 7.65   | 12.15  | 4.45   |
| O08749 | Dihydropyridinase, mitochondrial                                | 1043 | 15 | 839  | 688  | 0.6021 | 1.11 | 205  | 57.24  | 40.29  | 48.73  | 58.60  | 185 | 39.38  | 66.98  | 35.51  | 43.00  |
| Q62393 | Tumor protein D52                                               | 193  | 3  | 9    | 1516 | 0.3910 | 1.11 | 1    | 0.00   | 0.00   | 1.11   | 0.00   | 0   | 0.00   | 0.00   | 0.00   | 0.00   |
| Q9D0K2 | Succinyl-CoA:3-ketoacid-coenzyme A transferase 1, mitochondrial | 860  | 12 | 539  | 968  | 0.9002 | 1.11 | 147  | 24.22  | 46.79  | 21.04  | 55.05  | 133 | 27.57  | 39.23  | 41.12  | 25.20  |
| P47757 | F-actin-capping protein subunit beta                            | 878  | 12 | 389  | 658  | 0.3965 | 1.10 | 105  | 35.22  | 20.79  | 21.04  | 28.41  | 95  | 35.44  | 23.92  | 16.82  | 19.27  |
| Q8K1Z0 | Ubiquinone biosynthesis protein COQ9, mitochondrial             | 187  | 2  | 91   | 1198 | 0.6626 | 1.10 | 23   | 6.60   | 3.90   | 4.43   | 7.99   | 21  | 9.84   | 4.78   | 4.67   | 1.48   |
| Q6PEB6 | Mps one binder kinase activator-like 3                          | 209  | 4  | 53   | 1408 | 0.6737 | 1.10 | 13   | 6.60   | 2.60   | 3.32   | 0.89   | 12  | 5.91   | 4.78   | 0.00   | 1.48   |
| P62900 | 60S ribosomal protein L31                                       | 212  | 3  | 176  | 1196 | 0.6538 | 1.10 | 38   | 6.60   | 9.10   | 17.72  | 4.44   | 34  | 9.84   | 0.00   | 11.21  | 13.34  |
| P17426 | AP-2 complex subunit alpha-1                                    | 1784 | 27 | 931  | 825  | 0.8141 | 1.10 | 272  | 99.06  | 66.28  | 43.20  | 63.04  | 247 | 41.35  | 68.89  | 73.83  | 63.01  |
| P30416 | Peptidyl-prolyl cis-trans isomerase FKBP4                       | 285  | 5  | 41   | 1165 | 0.5762 | 1.10 | 13   | 4.40   | 3.90   | 0.00   | 4.44   | 12  | 3.94   | 7.65   | 0.00   | 0.00   |
| P35762 | CD81 antigen                                                    | 283  | 3  | 971  | 738  | 0.6771 | 1.10 | 270  | 50.63  | 64.98  | 64.24  | 89.68  | 245 | 80.73  | 67.94  | 41.12  | 55.60  |
| Q8K386 | Ras-related protein Rab-15                                      | 320  | 4  | 289  | 789  | 0.5588 | 1.10 | 80   | 19.81  | 19.49  | 15.51  | 24.86  | 73  | 7.88   | 25.83  | 15.89  | 22.98  |
| Q61792 | LIM and SH3 domain protein 1                                    | 219  | 3  | 79   | 1451 | 0.8358 | 1.10 | 25   | 13.21  | 6.50   | 5.54   | 0.00   | 23  | 15.75  | 0.00   | 2.80   | 4.45   |
| Q6IRU2 | Tropomyosin alpha-4 chain                                       | 261  | 4  | 75   | 1466 | 0.9101 | 1.10 | 25   | 2.20   | 1.30   | 13.29  | 7.99   | 23  | 7.88   | 6.70   | 6.54   | 1.48   |
| P00920 | Carbonic anhydrase 2                                            | 1099 | 14 | 1377 | 641  | 0.5664 | 1.10 | 359  | 77.05  | 80.58  | 98.57  | 103.00 | 328 | 86.63  | 91.86  | 86.91  | 62.27  |
| P23198 | Chromobox protein homolog 3                                     | 253  | 4  | 62   | 1438 | 0.7652 | 1.10 | 21   | 8.81   | 1.30   | 5.54   | 5.33   | 19  | 9.84   | 5.74   | 2.80   | 0.74   |
| O35381 | Acidic leucine-rich nuclear phosphoprotein 32 family member A   | 223  | 3  | 156  | 1036 | 0.7366 | 1.10 | 40   | 11.01  | 6.50   | 12.18  | 10.66  | 37  | 5.91   | 14.35  | 8.41   | 8.15   |
| Q60605 | Myosin light polypeptide 6                                      | 585  | 8  | 312  | 1231 | 0.8569 | 1.09 | 88   | 28.62  | 31.19  | 27.69  | 0.89   | 81  | 29.53  | 0.00   | 32.71  | 18.53  |
| Q9Z0P4 | Paralemmin                                                      | 429  | 6  | 124  | 1235 | 0.6876 | 1.09 | 38   | 11.01  | 10.40  | 12.18  | 4.44   | 35  | 15.75  | 1.91   | 7.48   | 9.64   |
| P56564 | Excitatory amino acid transporter 1                             | 728  | 9  | 1899 | 636  | 0.4929 | 1.09 | 477  | 105.67 | 126.06 | 110.76 | 134.08 | 436 | 51.19  | 121.52 | 127.10 | 136.40 |
| Q9Z1G4 | V-type proton ATPase 116 kDa subunit a isoform 1                | 1337 | 20 | 1418 | 734  | 0.6550 | 1.09 | 348  | 112.27 | 74.08  | 83.07  | 79.03  | 319 | 29.53  | 130.13 | 80.37  | 79.32  |
| Q9WV34 | MAGUK p55 subfamily member 2                                    | 248  | 4  | 80   | 1273 | 0.7368 | 1.09 | 20   | 8.81   | 5.20   | 3.32   | 2.66   | 18  | 5.91   | 6.70   | 2.80   | 2.97   |
| Q6PDM2 | Splicing factor, arginine/serine-rich 1                         | 438  | 7  | 152  | 1177 | 0.5962 | 1.09 | 53   | 17.61  | 10.40  | 14.40  | 10.66  | 49  | 19.69  | 16.27  | 4.67   | 8.15   |
| O88952 | Protein lin-7 homolog C                                         | 138  | 2  | 57   | 1343 | 0.8944 | 1.09 | 16   | 6.60   | 1.30   | 5.54   | 2.66   | 15  | 1.97   | 6.70   | 4.67   | 1.48   |
| Q9JM76 | Actin-related protein 2/3 complex subunit 3                     | 380  | 6  | 297  | 1287 | 0.9369 | 1.09 | 59   | 11.01  | 5.20   | 26.58  | 15.98  | 54  | 7.88   | 15.31  | 16.82  | 14.08  |
| Q9D615 | NADH dehydrogenase [ubiquinone] 1 beta subcomplex subunit       |      |    |      |      |        |      |      |        |        |        |        |     |        |        |        |        |



|        |                                                                                                    |      |    |      |      |        |       |     |        |        |        |        |     |        |        |        |        |
|--------|----------------------------------------------------------------------------------------------------|------|----|------|------|--------|-------|-----|--------|--------|--------|--------|-----|--------|--------|--------|--------|
| P99027 | 60S acidic ribosomal protein P2                                                                    | 574  | 7  | 485  | 1308 | 0.9945 | 1.05  | 117 | 26.42  | 36.39  | 53.16  | 0.89   | 111 | 39.38  | 0.96   | 28.04  | 43.00  |
| P62830 | 60S ribosomal protein L23                                                                          | 413  | 5  | 286  | 1238 | 0.7834 | 1.05  | 59  | 19.81  | 14.30  | 16.61  | 7.99   | 56  | 11.81  | 4.78   | 14.95  | 24.46  |
| Q60668 | Heterogeneous nuclear ribonucleoprotein D0                                                         | 284  | 4  | 136  | 1226 | 0.6005 | 1.05  | 39  | 8.81   | 7.80   | 9.97   | 12.43  | 37  | 9.84   | 12.44  | 14.95  | 0.00   |
| Q9CVB6 | Actin-related protein 2/3 complex subunit 2                                                        | 752  | 12 | 183  | 895  | 0.4783 | 1.05  | 47  | 13.21  | 10.40  | 13.29  | 9.77   | 45  | 25.60  | 0.00   | 9.35   | 9.64   |
| Q9D967 | Magnesium-dependent phosphatase 1                                                                  | 242  | 4  | 41   | 1086 | 0.3928 | 1.05  | 11  | 4.40   | 2.60   | 3.32   | 0.89   | 11  | 7.88   | 1.91   | 0.93   | 0.00   |
| Q9CZW5 | Mitochondrial import receptor subunit TOM70                                                        | 759  | 11 | 223  | 1302 | 0.9109 | 1.05  | 60  | 26.42  | 14.30  | 5.54   | 13.32  | 57  | 17.72  | 20.09  | 10.28  | 8.90   |
| Q9D2G2 | Dihydrolypolyllysine-residue succinyltransferase component of 2-oxoglutarate dehydrogenase complex | 582  | 8  | 311  | 1227 | 0.7727 | 1.04  | 99  | 33.02  | 18.19  | 21.04  | 26.64  | 95  | 17.72  | 43.06  | 16.82  | 17.05  |
| Q05793 | Basement membrane-specific heparan sulfate proteoglycan core protein 1                             | 732  | 13 | 114  | 1394 | 0.5398 | 1.04  | 32  | 6.60   | 5.20   | 11.08  | 8.88   | 30  | 11.81  | 0.96   | 2.80   | 14.83  |
| Q9CZC8 | Secernin-1                                                                                         | 324  | 5  | 89   | 1293 | 0.7147 | 1.04  | 27  | 8.81   | 5.20   | 6.65   | 6.22   | 26  | 1.97   | 12.44  | 4.67   | 6.67   |
| Q9JLC8 | Sacsin                                                                                             | 215  | 4  | 33   | 1251 | 0.6163 | 1.04  | 11  | 0.00   | 5.20   | 3.32   | 2.66   | 11  | 0.00   | 4.78   | 3.74   | 2.22   |
| Q8VDQ8 | NAD-dependent deacetylase sirtuin-2                                                                | 1173 | 15 | 758  | 810  | 0.7682 | 1.04  | 214 | 52.83  | 57.18  | 45.41  | 58.60  | 206 | 57.10  | 41.14  | 68.22  | 39.29  |
| Q8K2B3 | Succinate dehydrogenase [ubiquinone] flavoprotein subunit, mitochondrial                           | 1285 | 18 | 556  | 1039 | 0.8865 | 1.04  | 156 | 59.44  | 37.69  | 22.15  | 36.41  | 150 | 43.32  | 39.23  | 50.46  | 17.05  |
| O08539 | Myc box-dependent-interacting protein 1                                                            | 572  | 9  | 429  | 1015 | 0.8678 | 1.04  | 106 | 19.81  | 27.29  | 25.47  | 33.74  | 103 | 27.57  | 31.58  | 23.36  | 20.02  |
| Q9JL62 | Glycolipid transfer protein                                                                        | 319  | 5  | 135  | 1350 | 0.8261 | 1.04  | 25  | 11.01  | 5.20   | 6.65   | 1.78   | 24  | 9.84   | 4.78   | 4.67   | 4.45   |
| P16125 | L-lactate dehydrogenase B chain                                                                    | 1169 | 16 | 1211 | 962  | 0.5288 | 1.04  | 296 | 77.05  | 75.38  | 83.07  | 60.38  | 286 | 86.63  | 1.91   | 107.47 | 89.70  |
| P62814 | V-type proton ATPase subunit B, brain isoform                                                      | 2050 | 29 | 2277 | 793  | 0.6511 | 1.03  | 500 | 107.87 | 140.36 | 111.86 | 140.29 | 484 | 66.94  | 193.28 | 142.05 | 81.54  |
| A2AGT5 | Cytoskeleton-associated protein 5                                                                  | 340  | 6  | 35   | 1500 | 0.7902 | 1.03  | 9   | 2.20   | 2.60   | 2.22   | 1.78   | 9   | 1.97   | 0.96   | 1.87   | 3.71   |
| Q925N0 | Sideroflexin-5                                                                                     | 288  | 4  | 118  | 1428 | 0.6302 | 1.03  | 29  | 11.01  | 6.50   | 3.32   | 7.99   | 28  | 15.75  | 0.96   | 7.48   | 3.71   |
| Q9EPN1 | Neurobeachin                                                                                       | 489  | 7  | 163  | 1457 | 0.7619 | 1.03  | 34  | 6.60   | 7.80   | 17.72  | 1.78   | 33  | 3.94   | 8.61   | 12.15  | 8.15   |
| Q9JME5 | AP-3 complex subunit beta-2                                                                        | 640  | 10 | 134  | 1359 | 0.8268 | 1.03  | 34  | 15.41  | 10.40  | 4.43   | 3.55   | 33  | 5.91   | 11.48  | 6.54   | 8.90   |
| Q9QZE7 | Translin-associated protein X                                                                      | 177  | 3  | 29   | 1392 | 0.5898 | 1.03  | 7   | 2.20   | 1.30   | 2.22   | 1.78   | 7   | 3.94   | 0.00   | 1.87   | 1.48   |
| Q08331 | Calretinin                                                                                         | 830  | 13 | 470  | 1099 | 0.9553 | 1.03  | 117 | 39.63  | 13.00  | 37.66  | 26.64  | 114 | 33.47  | 36.36  | 26.17  | 17.79  |
| P39053 | Dynammin-1                                                                                         | 2578 | 37 | 2285 | 809  | 0.6672 | 1.03  | 660 | 147.50 | 166.35 | 140.66 | 205.11 | 642 | 102.38 | 199.02 | 138.31 | 202.38 |
| P28652 | Calcium/calmodulin-dependent protein kinase type II subunit beta                                   | 856  | 11 | 1130 | 903  | 0.8802 | 1.03  | 274 | 48.43  | 79.28  | 69.78  | 76.36  | 267 | 74.82  | 68.89  | 45.79  | 77.10  |
| Q922Y8 | Proline synthase co-transcribed bacterial homolog protein                                          | 390  | 6  | 133  | 1396 | 0.9143 | 1.03  | 37  | 15.41  | 2.60   | 6.65   | 12.43  | 36  | 9.84   | 14.35  | 7.48   | 4.45   |
| Q8R0Y8 | Solute carrier family 25 member 42                                                                 | 162  | 3  | 43   | 1240 | 0.5834 | 1.03  | 10  | 4.40   | 1.30   | 1.11   | 3.55   | 10  | 0.00   | 8.61   | 0.00   | 1.48   |
| P10637 | Microtubule-associated protein tau                                                                 | 218  | 4  | 92   | 1305 | 0.7133 | 1.03  | 23  | 0.00   | 7.80   | 9.97   | 5.33   | 22  | 7.88   | 3.83   | 5.61   | 5.19   |
| Q9DAR7 | Scavenger mRNA-decapping enzyme Dcp5                                                               | 276  | 4  | 53   | 1395 | 0.9115 | 1.03  | 13  | 0.00   | 3.90   | 3.32   | 6.22   | 13  | 1.97   | 4.78   | 5.61   | 0.74   |
| Q99104 | Myosin-Va                                                                                          | 2108 | 34 | 777  | 1056 | 0.9957 | 1.02  | 211 | 77.05  | 57.18  | 33.23  | 43.51  | 206 | 70.88  | 39.23  | 51.40  | 44.48  |
| Q8BGH2 | Sorting and assembly machinery component 50 homolog                                                | 464  | 8  | 98   | 1328 | 0.7431 | 1.02  | 32  | 6.60   | 10.40  | 6.65   | 7.99   | 31  | 13.78  | 7.65   | 6.54   | 2.97   |
| P99024 | Tubulin beta-5 chain                                                                               | 569  | 8  | 1227 | 961  | 0.8668 | 1.02  | 334 | 66.04  | 87.07  | 110.76 | 70.15  | 327 | 57.10  | 105.25 | 63.55  | 100.82 |
| P20108 | Thioredoxin-dependent peroxide reductase, mitochondrial                                            | 468  | 7  | 406  | 1252 | 0.7643 | 1.02  | 92  | 26.42  | 15.60  | 31.01  | 18.65  | 90  | 7.88   | 37.32  | 28.97  | 15.57  |
| P62301 | 40S ribosomal protein S13                                                                          | 358  | 6  | 164  | 1120 | 0.8139 | 1.02  | 48  | 13.21  | 13.00  | 9.97   | 11.54  | 47  | 13.78  | 8.61   | 10.28  | 14.08  |
| Q91V61 | Sideroflexin-3                                                                                     | 710  | 10 | 394  | 1104 | 0.9441 | 1.02  | 127 | 39.63  | 37.69  | 15.51  | 33.74  | 124 | 49.22  | 22.01  | 22.43  | 30.39  |
| Q9CPR4 | 60S ribosomal protein L17                                                                          | 168  | 3  | 89   | 1286 | 0.6502 | 1.02  | 27  | 6.60   | 5.20   | 8.86   | 6.22   | 26  | 3.94   | 3.83   | 11.21  | 7.41   |
| Q8BH95 | Enoyl-CoA hydratase, mitochondrial                                                                 | 677  | 10 | 312  | 1108 | 0.8793 | 1.02  | 75  | 22.01  | 11.70  | 21.04  | 20.42  | 74  | 19.69  | 29.66  | 11.21  | 13.34  |
| O55143 | Sarcoplasmic/endoplasmic reticulum calcium ATPase 2                                                | 978  | 15 | 813  | 1059 | 0.9900 | 1.02  | 212 | 72.65  | 51.98  | 35.44  | 52.39  | 209 | 41.35  | 57.41  | 48.60  | 61.53  |
| P37804 | Transgelin                                                                                         | 409  | 6  | 111  | 1174 | 0.4832 | 1.02  | 19  | 8.81   | 3.90   | 3.32   | 2.66   | 18  | 7.88   | 9.57   | 0.93   | 0.00   |
| Q99JY9 | Actin-related protein 3                                                                            | 577  | 8  | 302  | 1129 | 0.9789 | 1.02  | 69  | 13.21  | 13.00  | 21.04  | 21.31  | 67  | 19.69  | 17.22  | 18.69  | 11.86  |
| Q8CHH9 | Septin-8                                                                                           | 499  | 8  | 132  | 1421 | 0.5571 | 1.01  | 46  | 15.41  | 13.00  | 6.65   | 10.66  | 45  | 15.75  | 22.01  | 6.54   | 0.74   |
| Q922F4 | Tubulin beta-6 chain                                                                               | 169  | 2  | 570  | 1089 | 0.9111 | 1.01  | 156 | 19.81  | 44.19  | 52.06  | 39.96  | 154 | 43.32  | 44.02  | 30.84  | 35.58  |
| P63017 | Heat shock cognate 71 kDa protein                                                                  | 2222 | 30 | 2531 | 860  | 0.7049 | 1.01  | 589 | 110.07 | 166.35 | 147.31 | 165.16 | 580 | 96.48  | 233.47 | 128.96 | 121.57 |
| P63318 | Protein kinase C gamma type                                                                        | 849  | 12 | 347  | 1102 | 0.8592 | 1.01  | 85  | 24.22  | 18.19  | 24.37  | 18.65  | 84  | 13.78  | 30.62  | 20.56  | 19.27  |
| P38060 | Hydroxymethylglutaryl-CoA lyase, mitochondrial                                                     | 236  | 4  | 23   | 1563 | 0.9850 | 1.01  | 5   | 2.20   | 2.60   | 0.00   | 0.00   | 5   | 0.00   | 2.87   | 1.87   | 0.00   |
| P51863 | V-type proton ATPase subunit d 1                                                                   | 1006 | 14 | 685  | 857  | 0.5703 | 1.01  | 151 | 33.02  | 40.29  | 29.90  | 47.95  | 150 | 13.78  | 8.61   | 77.57  | 49.67  |
| Q9CQN1 | Heat shock protein 75 kDa, mitochondrial                                                           | 258  | 4  | 279  | 1157 | 0.9402 | 1.01  | 90  | 19.81  | 32.49  | 17.72  | 20.42  | 90  | 25.60  | 23.92  | 21.49  | 18.53  |
| P54227 | Stathmin                                                                                           | 236  | 4  | 250  | 1173 | 0.9805 | 1.01  | 54  | 11.01  | 18.19  | 18.83  | 6.22   | 54  | 19.69  | 6.70   | 14.02  | 13.34  |
| Q6A4J8 | Ubiquitin carboxyl-terminal hydrolase 7                                                            | 425  | 7  | 83   | 1486 | 0.9110 | 1.01  | 20  | 6.60   | 1.30   | 2.22   | 9.77   | 20  | 0.00   | 6.70   | 5.61   | 7.41   |
| P46096 | Synaptotagmin-1                                                                                    | 874  | 12 | 1367 | 963  | 0.9133 | 1.01  | 310 | 92.46  | 80.58  | 65.35  | 71.92  | 308 | 51.19  | 82.29  | 80.37  | 94.15  |
| P19246 | Neurofilament heavy polypeptide                                                                    | 1313 | 18 | 999  | 941  | 0.8040 | 1.01  | 265 | 61.64  | 64.98  | 58.70  | 79.91  | 264 | 37.41  | 99.51  | 71.96  | 54.86  |
| P63328 | Serine/threonine-protein phosphatase 2B catalytic subunit alpha isoform 1                          | 916  | 14 | 756  | 993  | 0.7672 | 1.01  | 163 | 48.43  | 35.09  | 40.98  | 38.18  | 162 | 51.19  | 54.54  | 38.32  | 17.79  |
| Q9D051 | Pyruvate dehydrogenase E1 component subunit beta, mitochondrial                                    | 1527 | 21 | 1294 | 980  | 0.5031 | 1.00  | 323 | 107.87 | 74.08  | 76.42  | 64.82  | 322 | 116.17 | 0.00   | 102.80 | 103.04 |
| Q9D882 | Uncharacterized protein C10orf35 homolog                                                           | 134  | 2  | 19   | 1512 | 0.4255 | 1.00  | 8   | 4.40   | 2.60   | 0.00   | 0.89   | 8   | 7.88   | 0.00   | 0.00   | 0.00   |
| Q7TQI3 | Ubiquitin thioesterase OTUB1                                                                       | 715  | 10 | 629  | 1045 | 0.8294 | 1.00  | 146 | 52.83  | 18.19  | 27.69  | 47.06  | 146 | 45.29  | 39.23  | 33.64  | 27.43  |
| Q3TXX4 | Vesicular glutamate transporter 1                                                                  | 188  | 3  | 140  | 1407 | 0.5060 | 1.00  | 28  | 15.41  | 7.80   | 3.32   | 1.78   | 28  | 9.84   | 7.65   | 5.61   | 5.19   |
| Q9D5V5 | Cullin-5                                                                                           | 153  | 3  | 5    | 1531 | 0.3910 | 0.89  | 1   | 0.00   | 0.00   | 0.00   | 0.89   | 0   | 0.00   | 0.00   | 0.00   | 0.00   |
| P11276 | Fibronectin                                                                                        | 210  | 4  | 10   | 1564 | ?      | 0.00  | 0   | 0.00   | 0.00   | 0.00   | 0.00   | 0   | 0.00   | 0.00   | 0.00   | 0.00   |
| P56389 | Cytidine deaminase                                                                                 | 161  | 3  | 9    | 1565 | ?      | 0.00  | 0   | 0.00   | 0.00   | 0.00   | 0.00   | 0   | 0.00   | 0.00   | 0.00   | 0.00   |
| Q8BSL7 | ADP-ribosylation factor 2                                                                          | 124  | 2  | 12   | 1566 | ?      | 0.00  | 0   | 0.00   | 0.00   | 0.00   | 0.00   | 0   | 0.00   | 0.00   | 0.00   | 0.00   |
| Q8BMJ3 | Eukaryotic translation initiation factor 1A, X-chromosomal                                         | 117  | 2  | 3    | 1567 | ?      | 0.00  | 0   | 0.00   | 0.00   | 0.00   | 0.00   | 0   | 0.00   | 0.00   | 0.00   | 0.00   |
| Q01149 | Collagen alpha-2(I) chain                                                                          | 317  | 5  | 9    | 1532 | 0.3910 | -0.74 | 0   | 0.00   | 0.00   | 0.00   | 0.00   | 1   | 0.00   | 0.00   | 0.00   | 0.74   |
| Q66JS6 | Eukaryotic translation initiation factor 3 subunit J                                               | 134  | 2  | 4    | 1530 | 0.3910 | -0.93 | 0   | 0.00   | 0.00   | 0.00   | 0.00   | 1   | 0.00   | 0.00   | 0.93   | 0.00   |
| Q61490 | CD166 antigen                                                                                      | 462  | 8  | 165  | 1290 | 0.9890 | -1.00 | 44  | 11.01  | 13.00  | 4.43   | 15.98  | 44  | 7.88   | 12.44  | 5.61   | 18.53  |
| Q8R464 | Cell adhesion molecule 4                                                                           | 325  | 4  | 91   | 1399 | 0.8723 | -1.00 | 42  | 6.60   | 14.30  | 7.75   | 13.32  | 42  | 19.69  | 6.70   | 11.21  | 4.45   |
| P21107 | Tropomyosin alpha-3 chain                                                                          | 335  | 5  | 149  | 1428 | 0.9670 | -1.00 | 36  | 15.41  | 3.90   | 8.86   | 7.99   | 36  | 3.94   | 17.22  | 8.41   | 6.67   |
| Q3THS6 | S-adenosylmethionine synthase isoform type-2                                                       | 360  | 5  | 52   | 1115 | 0.3801 | -1.00 | 14  | 2.20   | 1.30   | 6.65   | 3.55   | 14  | 1.97   | 0.00   | 10.28  | 1.48   |
| Q9CZU6 | Citrate synthase, mitochondrial                                                                    | 1240 | 18 | 797  | 1083 | 0.9950 | -1.00 | 189 | 50.63  | 28.59  | 49.84  | 59.49  | 189 | 57.10  | 35.40  | 62.61  | 34.10  |
| P08553 | Neurofilament medium polypeptide                                                                   | 1552 | 22 | 1322 | 1018 | 0.9159 | -1.00 | 392 | 94.66  | 102.67 | 76.42  | 118.10 | 394 | 64.98  | 124.39 | 87.85  | 116.39 |
| Q8JZN5 | Acyl-CoA dehydrogenase family member 9, mitochondrial                                              | 706  | 12 | 70   | 1439 | 0.6100 | -1.01 | 20  | 6.60   | 11.70  | 1.11   | 0.89   | 20  | 7.88   | 3.83   | 2.80   | 5.93   |
| Q60930 | Voltage-dependent anion-selective channel protein 2                                                | 885  | 13 | 1018 | 1065 | 0.6149 | -1.01 | 278 | 79.25  | 59.78  | 74.21  | 64.82  | 280 | 106.32 | 11.48  | 64.48  | 97.85  |
| Q61879 | Myosin-10                                                                                          | 3636 | 52 | 1649 | 982  | 0.9465 | -1.01 | 413 | 101.27 | 96.17  | 101.90 | 113.66 | 416 | 76.79  | 113.87 | 130.83 | 94.89  |
| P56399 | Ubiquitin carboxyl-terminal hydrolase 5                                                            | 963  | 13 | 451  | 1107 | 0.9291 | -1.01 | 118 | 30.82  | 27.29  | 19.94  | 39.96  | 119 | 15.75  | 43.06  | 36.45  | 23     |

|        |                                                                        |      |    |      |      |        |       |      |        |        |        |        |      |        |        |        |        |
|--------|------------------------------------------------------------------------|------|----|------|------|--------|-------|------|--------|--------|--------|--------|------|--------|--------|--------|--------|
| Q9R0P3 | S-formylglutathione hydrolase                                          | 624  | 9  | 324  | 1158 | 0.9839 | -1.03 | 63   | 13.21  | 11.70  | 15.51  | 22.20  | 65   | 9.84   | 16.27  | 25.23  | 13.34  |
| P45591 | Cofilin-2                                                              | 303  | 5  | 245  | 1247 | 0.9672 | -1.03 | 49   | 13.21  | 13.00  | 14.40  | 7.99   | 50   | 13.78  | 6.70   | 14.95  | 14.83  |
| P35486 | Pyruvate dehydrogenase E1 component subunit alpha, somatic form,       | 954  | 13 | 702  | 934  | 0.8557 | -1.04 | 191  | 37.42  | 36.39  | 47.63  | 69.26  | 198  | 47.25  | 34.45  | 71.96  | 44.48  |
| P61924 | Coatomer subunit zeta-1                                                | 310  | 5  | 55   | 1358 | 0.5197 | -1.04 | 7    | 2.20   | 1.30   | 2.22   | 0.89   | 7    | 5.91   | 0.96   | 0.00   | 0.00   |
| O35678 | Monoglyceride lipase                                                   | 454  | 7  | 115  | 1206 | 0.9183 | -1.04 | 29   | 11.01  | 6.50   | 4.43   | 7.10   | 30   | 11.81  | 4.78   | 8.41   | 5.19   |
| P10649 | Glutathione S-transferase Mu 1                                         | 1259 | 18 | 1237 | 811  | 0.6910 | -1.04 | 301  | 81.45  | 51.98  | 106.33 | 61.27  | 313  | 82.70  | 86.12  | 82.24  | 62.27  |
| Q812A2 | SLIT-ROBO Rho GTPase-activating protein 3                              | 276  | 4  | 8    | 1551 | 0.8380 | -1.04 | 4    | 2.20   | 1.30   | 0.00   | 0.00   | 4    | 1.97   | 0.00   | 0.93   | 0.74   |
| P62307 | Small nuclear ribonucleoprotein F                                      | 124  | 2  | 21   | 1410 | 0.6603 | -1.04 | 9    | 2.20   | 2.60   | 3.32   | 0.89   | 9    | 1.97   | 0.00   | 0.00   | 7.41   |
| P07901 | Heat shock protein HSP 90-alpha                                        | 2298 | 31 | 1642 | 963  | 0.8996 | -1.04 | 411  | 103.47 | 111.77 | 60.92  | 134.97 | 429  | 64.98  | 143.53 | 126.16 | 94.15  |
| P35700 | Peroxisome oxidin-1                                                    | 703  | 12 | 564  | 946  | 0.7601 | -1.04 | 117  | 39.63  | 18.19  | 36.55  | 23.09  | 123  | 29.53  | 38.27  | 28.04  | 26.69  |
| P08249 | Malate dehydrogenase, mitochondrial                                    | 1685 | 21 | 2601 | 1029 | 0.6417 | -1.04 | 663  | 222.34 | 150.75 | 165.03 | 125.20 | 692  | 240.21 | 15.31  | 207.46 | 229.06 |
| Q9ES97 | Reticulon-3                                                            | 370  | 6  | 204  | 1132 | 0.7875 | -1.04 | 45   | 15.41  | 11.70  | 8.86   | 8.88   | 47   | 13.78  | 8.61   | 14.02  | 10.38  |
| Q80TZ3 | Putative tyrosine-protein phosphatase auxilin                          | 273  | 5  | 92   | 1478 | 0.9416 | -1.04 | 14   | 8.81   | 3.90   | 0.00   | 1.78   | 15   | 0.00   | 8.61   | 2.80   | 3.71   |
| P97797 | Tyrosine-protein phosphatase non-receptor type substrate 1             | 501  | 8  | 290  | 988  | 0.7670 | -1.05 | 90   | 15.41  | 24.69  | 12.18  | 37.29  | 94   | 13.78  | 36.36  | 21.49  | 22.24  |
| P97807 | Fumarate hydratase, mitochondrial                                      | 1053 | 15 | 514  | 781  | 0.6260 | -1.05 | 122  | 24.22  | 36.39  | 23.26  | 38.18  | 128  | 25.60  | 41.14  | 30.84  | 30.39  |
| P26231 | Catenin alpha-1                                                        | 445  | 7  | 67   | 1490 | 0.9994 | -1.05 | 17   | 4.40   | 9.10   | 1.11   | 2.66   | 18   | 3.94   | 2.87   | 0.93   | 10.38  |
| O08553 | Dihydropyrimidinase-related protein 2                                  | 2570 | 35 | 5949 | 687  | 0.5721 | -1.05 | 1377 | 264.17 | 397.68 | 327.84 | 387.14 | 1445 | 303.22 | 469.81 | 342.04 | 329.88 |
| P31324 | cAMP-dependent protein kinase type II-beta regulatory subunit          | 735  | 10 | 266  | 1328 | 0.9618 | -1.05 | 73   | 22.01  | 23.39  | 11.08  | 16.87  | 77   | 9.84   | 34.45  | 18.69  | 14.08  |
| O54991 | Contactin-associated protein 1                                         | 1188 | 18 | 531  | 1081 | 0.9637 | -1.05 | 154  | 44.03  | 37.69  | 25.47  | 47.06  | 162  | 41.35  | 34.45  | 62.61  | 23.72  |
| P11881 | Inositol 1,4,5-trisphosphate receptor type 1                           | 3174 | 51 | 1238 | 829  | 0.8142 | -1.05 | 330  | 83.65  | 62.38  | 83.07  | 101.23 | 348  | 84.66  | 89.94  | 109.34 | 63.75  |
| Q3UMR5 | Coiled-coil domain-containing protein 109A                             | 247  | 4  | 39   | 1488 | 0.9968 | -1.05 | 11   | 2.20   | 0.00   | 3.32   | 5.33   | 11   | 7.88   | 0.96   | 1.87   | 0.74   |
| Q791V5 | Mitochondrial carrier homolog 2                                        | 594  | 9  | 232  | 1096 | 0.9199 | -1.05 | 66   | 22.01  | 18.19  | 15.51  | 10.66  | 70   | 27.57  | 20.09  | 11.21  | 11.12  |
| P46660 | Alpha-internexin                                                       | 1175 | 16 | 1334 | 904  | 0.8540 | -1.06 | 396  | 85.86  | 100.07 | 80.85  | 128.75 | 418  | 80.73  | 156.92 | 77.57  | 102.30 |
| Q9WV60 | Glycogen synthase kinase-3 beta                                        | 303  | 4  | 104  | 1333 | 0.8217 | -1.06 | 24   | 6.60   | 3.90   | 3.32   | 10.66  | 26   | 9.84   | 6.70   | 5.61   | 3.71   |
| P63085 | Mitogen-activated protein kinase 1                                     | 735  | 11 | 276  | 853  | 0.5879 | -1.06 | 70   | 13.21  | 22.09  | 8.86   | 25.75  | 74   | 21.66  | 18.18  | 14.02  | 20.02  |
| P61922 | 4-aminobutyrate aminotransferase, mitochondrial                        | 1960 | 26 | 1521 | 929  | 0.8774 | -1.06 | 355  | 61.64  | 98.77  | 88.61  | 105.66 | 376  | 63.01  | 141.61 | 100.93 | 70.42  |
| Q8BFQ8 | Parkinson disease 7 domain-containing protein 1                        | 375  | 5  | 169  | 1471 | 0.8827 | -1.06 | 29   | 6.60   | 5.20   | 5.54   | 11.54  | 31   | 3.94   | 16.27  | 7.48   | 2.97   |
| Q9DCW4 | Electron transfer flavoprotein subunit beta                            | 541  | 8  | 205  | 1211 | 0.9613 | -1.06 | 46   | 15.41  | 6.50   | 12.18  | 11.54  | 48   | 11.81  | 19.14  | 5.61   | 11.86  |
| P56375 | Acylphosphatase-2                                                      | 240  | 4  | 46   | 1344 | 0.8566 | -1.06 | 18   | 6.60   | 6.50   | 3.32   | 1.78   | 19   | 5.91   | 0.00   | 7.48   | 5.93   |
| Q8VED5 | Keratin, type II cytoskeletal 79                                       | 143  | 2  | 91   | 1498 | 0.8495 | -1.06 | 18   | 0.00   | 3.90   | 13.29  | 0.89   | 19   | 0.00   | 1.91   | 4.67   | 12.60  |
| Q62241 | U1 small nuclear ribonucleoprotein C                                   | 132  | 2  | 15   | 1557 | 0.9255 | -1.06 | 6    | 0.00   | 1.30   | 3.32   | 0.89   | 6    | 3.94   | 1.91   | 0.00   | 0.00   |
| Q8CAQ8 | Mitochondrial inner membrane protein                                   | 1584 | 23 | 703  | 740  | 0.6152 | -1.07 | 214  | 39.63  | 67.58  | 33.23  | 73.70  | 228  | 47.25  | 71.76  | 57.94  | 51.15  |
| Q99J14 | 26S proteasome non-ATPase regulatory subunit 6                         | 183  | 3  | 10   | 1552 | 0.8731 | -1.07 | 5    | 0.00   | 2.60   | 1.11   | 0.89   | 5    | 3.94   | 0.96   | 0.00   | 0.00   |
| Q62420 | Endophilin-A1                                                          | 473  | 7  | 510  | 1087 | 0.9859 | -1.07 | 132  | 41.83  | 25.99  | 31.01  | 32.85  | 140  | 33.47  | 17.22  | 53.27  | 36.32  |
| P62849 | 40S ribosomal protein S24                                              | 183  | 3  | 150  | 1147 | 0.8484 | -1.07 | 35   | 8.81   | 7.80   | 14.40  | 3.55   | 37   | 11.81  | 3.83   | 9.35   | 11.86  |
| O89112 | LanC-like protein 1                                                    | 399  | 6  | 215  | 1400 | 0.9818 | -1.07 | 45   | 13.21  | 15.60  | 5.54   | 10.66  | 48   | 7.88   | 16.27  | 18.69  | 5.19   |
| P62270 | 40S ribosomal protein S18                                              | 330  | 5  | 163  | 1121 | 0.4644 | -1.07 | 47   | 22.01  | 9.10   | 9.97   | 6.22   | 50   | 15.75  | 10.53  | 13.08  | 11.12  |
| P13595 | Neural cell adhesion molecule 1                                        | 1457 | 20 | 1814 | 911  | 0.8723 | -1.07 | 399  | 90.26  | 100.07 | 96.36  | 111.88 | 426  | 37.41  | 154.05 | 122.42 | 111.94 |
| Q9Z1G3 | V-type proton ATPase subunit C 1                                       | 623  | 9  | 324  | 1326 | 0.9813 | -1.07 | 88   | 17.61  | 23.39  | 15.51  | 31.08  | 94   | 15.75  | 23.92  | 42.05  | 11.86  |
| P31938 | Dual specificity mitogen-activated protein kinase kinase 1             | 369  | 5  | 173  | 1188 | 0.7509 | -1.07 | 50   | 11.01  | 9.10   | 13.29  | 16.87  | 54   | 13.78  | 2.87   | 25.23  | 11.86  |
| P14094 | Sodium/potassium-transporting ATPase subunit beta-1                    | 714  | 11 | 1797 | 699  | 0.6319 | -1.07 | 448  | 116.68 | 123.46 | 107.43 | 100.34 | 479  | 102.38 | 160.75 | 98.13  | 117.87 |
| Q61553 | Fascin                                                                 | 736  | 11 | 346  | 1461 | 0.9956 | -1.07 | 71   | 13.21  | 32.49  | 6.65   | 18.65  | 76   | 9.84   | 41.14  | 17.76  | 7.41   |
| Q8K1M6 | Dynamin-1-like protein                                                 | 1534 | 22 | 618  | 772  | 0.6526 | -1.07 | 158  | 39.63  | 44.19  | 29.90  | 44.40  | 170  | 43.32  | 55.50  | 38.32  | 32.62  |
| Q9QXL2 | Kinesin-like protein KIF21A                                            | 841  | 13 | 158  | 1079 | 0.7599 | -1.07 | 28   | 2.20   | 6.50   | 9.97   | 8.88   | 30   | 7.88   | 3.83   | 11.21  | 6.67   |
| Q60864 | Stress-induced-phosphoprotein 1                                        | 750  | 12 | 266  | 1168 | 0.7265 | -1.08 | 63   | 17.61  | 23.39  | 9.97   | 11.54  | 67   | 13.78  | 31.58  | 19.63  | 2.22   |
| P62754 | 40S ribosomal protein S6                                               | 410  | 6  | 115  | 1316 | 0.8210 | -1.08 | 29   | 13.21  | 3.90   | 3.32   | 8.88   | 32   | 7.88   | 13.40  | 6.54   | 3.71   |
| O88485 | Cytoplasmic dynein 1 intermediate chain 1                              | 495  | 7  | 169  | 1316 | 0.4426 | -1.08 | 33   | 0.00   | 6.50   | 6.65   | 19.53  | 35   | 1.97   | 7.65   | 15.89  | 9.64   |
| P42669 | Transcriptional activator protein Pur-alpha                            | 458  | 6  | 449  | 1032 | 0.8737 | -1.08 | 107  | 24.22  | 20.79  | 26.58  | 35.52  | 115  | 29.53  | 20.09  | 44.86  | 20.76  |
| Q9CPU0 | Lactoylglutathione lyase                                               | 499  | 8  | 292  | 1292 | 0.9401 | -1.08 | 59   | 13.21  | 15.60  | 16.61  | 13.32  | 63   | 15.75  | 10.53  | 28.04  | 8.90   |
| Q91VR2 | ATP synthase subunit gamma, mitochondrial                              | 712  | 10 | 616  | 1057 | 0.9776 | -1.08 | 148  | 50.63  | 22.09  | 40.98  | 34.63  | 160  | 17.72  | 66.02  | 33.64  | 42.25  |
| Q9WUM5 | Succinyl-CoA ligase [GDP-forming] subunit alpha, mitochondrial         | 477  | 6  | 364  | 1278 | 0.9054 | -1.08 | 82   | 15.41  | 11.70  | 28.80  | 25.75  | 88   | 21.66  | 5.74   | 30.84  | 29.65  |
| Q9DCT8 | Cysteine-rich protein 2                                                | 173  | 3  | 114  | 1113 | 0.8259 | -1.08 | 24   | 4.40   | 5.20   | 8.86   | 5.33   | 26   | 9.84   | 4.78   | 6.54   | 4.45   |
| P46638 | Ras-related protein Rab-11B                                            | 129  | 2  | 93   | 1180 | 0.5887 | -1.08 | 20   | 8.81   | 1.30   | 6.65   | 3.55   | 22   | 5.91   | 5.74   | 6.54   | 3.71   |
| P48453 | Serine/threonine-protein phosphatase 2B catalytic subunit beta isoform | 334  | 5  | 96   | 1436 | 0.7335 | -1.08 | 22   | 13.21  | 7.80   | 1.11   | 0.00   | 24   | 3.94   | 12.44  | 7.48   | 0.00   |
| Q9JKB1 | Ubiquitin carboxyl-terminal hydrolase isozyme L3                       | 251  | 4  | 84   | 1055 | 0.7363 | -1.08 | 12   | 4.40   | 1.30   | 2.22   | 4.44   | 13   | 5.91   | 6.70   | 0.00   | 0.74   |
| Q61735 | Leukocyte surface antigen CD47                                         | 232  | 3  | 223  | 1348 | 0.6645 | -1.08 | 63   | 39.63  | 9.10   | 8.86   | 5.33   | 68   | 11.81  | 9.57   | 17.76  | 28.91  |
| Q80TJ1 | Calcium-dependent secretion activator 1                                | 1867 | 28 | 684  | 763  | 0.6464 | -1.08 | 120  | 35.22  | 36.39  | 22.15  | 25.75  | 129  | 29.53  | 32.53  | 24.30  | 43.00  |
| Q9QZ06 | Toll-interacting protein                                               | 334  | 6  | 110  | 1153 | 0.5295 | -1.08 | 26   | 17.61  | 2.60   | 4.43   | 0.89   | 28   | 5.91   | 12.44  | 5.61   | 3.71   |
| Q9Z0Y1 | Dynactin subunit 3                                                     | 286  | 5  | 93   | 916  | 0.6346 | -1.08 | 17   | 4.40   | 3.90   | 4.43   | 4.44   | 19   | 3.94   | 5.74   | 3.74   | 5.19   |
| Q9CPQ8 | ATP synthase subunit g, mitochondrial                                  | 458  | 5  | 334  | 1336 | 0.7053 | -1.08 | 121  | 35.22  | 37.69  | 40.98  | 7.10   | 131  | 27.57  | 0.00   | 28.04  | 75.61  |
| Q01768 | Nucleoside diphosphate kinase B                                        | 392  | 5  | 240  | 1456 | 0.8265 | -1.09 | 42   | 6.60   | 19.49  | 8.86   | 7.10   | 46   | 11.81  | 0.96   | 8.41   | 24.46  |
| Q2PFD7 | PH and SEC7 domain-containing protein 3                                | 196  | 3  | 112  | 1314 | 0.8335 | -1.09 | 25   | 6.60   | 3.90   | 3.32   | 11.54  | 28   | 7.88   | 4.78   | 11.21  | 3.71   |
| P12970 | 60S ribosomal protein L7a                                              | 336  | 5  | 163  | 994  | 0.8379 | -1.09 | 51   | 19.81  | 9.10   | 7.75   | 14.21  | 55   | 17.72  | 21.05  | 8.41   | 8.15   |
| Q8R395 | COMM domain-containing protein 5                                       | 184  | 3  | 50   | 1514 | 0.9519 | -1.09 | 8    | 2.20   | 0.00   | 2.22   | 3.55   | 9    | 3.94   | 2.87   | 1.87   | 0.00   |
| P67778 | Prohibitin                                                             | 843  | 10 | 627  | 617  | 0.4617 | -1.09 | 171  | 48.43  | 25.99  | 55.38  | 40.85  | 186  | 41.35  | 42.10  | 54.20  | 48.18  |
| P63028 | Translationally-controlled tumor protein                               | 438  | 6  | 354  | 1025 | 0.8832 | -1.09 | 69   | 22.01  | 9.10   | 19.94  | 17.76  | 75   | 13.78  | 31.58  | 17.76  | 11.86  |
| Q9CQ65 | S-methyl-5'-thioadenosine phosphorylase                                | 181  | 3  | 28   | 1508 | 0.9169 | -1.09 | 5    | 2.20   | 1.30   | 0.00   | 1.78   | 6    | 1.97   | 1.91   | 1.87   | 0.00   |
| Q9R0Q6 | Actin-related protein 2/3 complex subunit 1A                           | 366  | 5  | 107  | 1463 | 0.8711 | -1.09 | 29   | 6.60   | 9.10   | 2.22   | 10.66  | 31   | 3.94   | 13.40  | 13.08  | 0.74   |
| P08752 | Guanine nucleotide-binding protein G(i) subunit alpha-2                | 796  | 12 | 275  | 1059 | 0.9303 | -1.09 | 74   | 19.81  | 20.79  | 16.61  | 16.87  | 81   | 21.66  | 16.27  | 31.77  | 11.12  |
| Q9Z2Q6 | Septin-5                                                               | 668  | 11 | 373  | 756  | 0.5686 | -1.09 | 104  | 26.42  | 29.89  | 17.72  | 30.19  | 114  | 37.41  | 26.79  | 25.23  | 24.46  |
| Q9CWZ7 | Gamma-soluble NSF attachment protein                                   | 668  | 11 | 224  | 1281 | 0.7731 | -1.09 | 49   | 11.01  | 14.30  | 7.75   | 15.98  | 54   | 19.69  | 0.96   | 19.63  | 13.34  |
| Q9D0M5 | Dynein light chain 2, cytoplasmic                                      | 917  | 9  | 367  | 1285 | 0.6146 | -1.09 | 127  | 28.62  | 41.59  | 37     |        |      |        |        |        |        |

|        |                                                                   |       |     |       |      |        |       |      |        |        |        |        |      |        |        |        |        |
|--------|-------------------------------------------------------------------|-------|-----|-------|------|--------|-------|------|--------|--------|--------|--------|------|--------|--------|--------|--------|
| Q3UU96 | Serine/threonine-protein kinase MRCK alpha                        | 209   | 4   | 20    | 1553 | 0.7312 | -1.12 | 4    | 2.20   | 1.30   | 0.00   | 0.00   | 4    | 3.94   | 0.00   | 0.00   | 0.00   |
| Q9JHU4 | Cytoplasmic dynein 1 heavy chain 1                                | 13471 | 204 | 7504  | 251  | 0.0837 | -1.13 | 1511 | 330.21 | 362.59 | 388.76 | 429.76 | 1703 | 376.07 | 386.57 | 495.30 | 444.78 |
| Q8ROA7 | Uncharacterized protein KIAA0513                                  | 156   | 2   | 29    | 1481 | 0.8162 | -1.13 | 9    | 4.40   | 1.30   | 1.11   | 1.78   | 10   | 5.91   | 2.87   | 0.93   | 0.00   |
| Q9R0K7 | Plasma membrane calcium-transporting ATPase 2                     | 2426  | 33  | 2498  | 268  | 0.1038 | -1.13 | 625  | 180.52 | 153.35 | 137.34 | 153.61 | 709  | 183.11 | 201.90 | 151.39 | 172.72 |
| Q99K10 | Aconitate hydratase, mitochondrial                                | 2504  | 35  | 2781  | 677  | 0.6141 | -1.14 | 675  | 149.70 | 166.35 | 149.52 | 209.55 | 766  | 112.23 | 251.65 | 211.20 | 191.26 |
| Q60931 | Voltage-dependent anion-selective channel protein 3               | 763   | 10  | 827   | 615  | 0.5106 | -1.14 | 195  | 50.63  | 53.28  | 43.20  | 47.95  | 222  | 76.79  | 42.10  | 44.86  | 57.82  |
| P30275 | Creatine kinase U-type, mitochondrial                             | 819   | 12  | 538   | 965  | 0.9341 | -1.14 | 142  | 28.62  | 36.39  | 40.98  | 35.52  | 161  | 61.04  | 16.27  | 49.53  | 34.10  |
| P63001 | Ras-related C3 botulinum toxin substrate 1                        | 297   | 5   | 266   | 1065 | 0.8384 | -1.14 | 46   | 13.21  | 11.70  | 11.08  | 9.77   | 52   | 19.69  | 14.35  | 5.61   | 12.60  |
| Q9R1P4 | Proteasome subunit alpha type-1                                   | 451   | 7   | 188   | 667  | 0.3125 | -1.15 | 32   | 11.01  | 3.90   | 11.08  | 6.22   | 37   | 9.84   | 7.65   | 11.21  | 8.15   |
| Q6ZWN5 | 40S ribosomal protein S9                                          | 216   | 4   | 86    | 978  | 0.7280 | -1.15 | 19   | 6.60   | 2.60   | 5.54   | 4.44   | 22   | 3.94   | 7.65   | 3.74   | 6.67   |
| Q3THE2 | Myosin regulatory light chain 12B                                 | 340   | 5   | 186   | 1165 | 0.6461 | -1.15 | 43   | 15.41  | 6.50   | 18.83  | 2.66   | 50   | 9.84   | 19.14  | 7.48   | 13.34  |
| Q8VEM8 | Phosphate carrier protein, mitochondrial                          | 874   | 13  | 1647  | 295  | 0.1682 | -1.15 | 426  | 116.68 | 102.67 | 80.85  | 126.09 | 489  | 133.89 | 143.53 | 89.71  | 122.32 |
| P57759 | Endoplasmic reticulum resident protein 29                         | 606   | 9   | 163   | 774  | 0.4663 | -1.15 | 41   | 15.41  | 6.50   | 13.29  | 5.33   | 47   | 17.72  | 12.44  | 11.21  | 5.19   |
| P14152 | Malate dehydrogenase, cytoplasmic                                 | 818   | 11  | 1281  | 1154 | 0.9779 | -1.15 | 319  | 94.66  | 76.68  | 74.21  | 73.70  | 367  | 143.73 | 27.75  | 87.85  | 107.49 |
| Q9R1T4 | Septin-6                                                          | 501   | 7   | 229   | 760  | 0.5861 | -1.15 | 50   | 11.01  | 13.00  | 7.75   | 18.65  | 58   | 11.81  | 18.18  | 16.82  | 11.12  |
| Q9QUR7 | Peptidyl-prolyl cis-trans isomerase NIMA-interacting 1            | 436   | 6   | 317   | 448  | 0.1824 | -1.15 | 56   | 15.41  | 7.80   | 12.18  | 20.42  | 64   | 19.69  | 10.53  | 11.21  | 22.98  |
| P58771 | Tropomyosin alpha-1 chain                                         | 210   | 3   | 157   | 1154 | 0.6327 | -1.15 | 33   | 15.41  | 1.30   | 11.08  | 5.33   | 38   | 7.88   | 14.35  | 5.61   | 10.38  |
| Q9CPV4 | Glyoxalase domain-containing protein 4                            | 744   | 12  | 287   | 735  | 0.5532 | -1.15 | 77   | 30.82  | 9.10   | 14.40  | 23.09  | 89   | 17.72  | 25.83  | 24.30  | 21.50  |
| Q8R0F8 | Fumarylacetoacetate hydrolase domain-containing protein 1         | 274   | 4   | 92    | 1283 | 0.8640 | -1.15 | 12   | 2.20   | 2.60   | 5.54   | 1.78   | 14   | 3.94   | 6.70   | 1.87   | 1.48   |
| P97478 | Ubiquinone biosynthesis protein COQ7 homolog                      | 243   | 4   | 27    | 1503 | 0.9910 | -1.16 | 7    | 2.20   | 2.60   | 0.00   | 1.78   | 8    | 1.97   | 0.96   | 4.67   | 0.00   |
| P99029 | Peroxisomal oxidoreductase 5, mitochondrial                       | 873   | 13  | 1614  | 897  | 0.9893 | -1.16 | 326  | 81.45  | 84.47  | 100.79 | 59.49  | 378  | 118.14 | 25.83  | 113.08 | 120.83 |
| P17710 | Hexokinase-1                                                      | 2671  | 35  | 2281  | 692  | 0.6765 | -1.16 | 555  | 143.09 | 133.86 | 99.68  | 178.48 | 643  | 86.63  | 205.72 | 187.84 | 163.09 |
| Q9CPQ3 | Mitochondrial import receptor subunit TOM22 homolog               | 555   | 9   | 257   | 1331 | 0.9715 | -1.16 | 49   | 11.01  | 9.10   | 12.18  | 16.87  | 57   | 25.60  | 10.53  | 4.67   | 16.31  |
| P20357 | Microtubule-associated protein 2                                  | 2882  | 45  | 1619  | 1195 | 0.6984 | -1.16 | 256  | 41.83  | 53.28  | 138.45 | 22.20  | 297  | 114.20 | 32.53  | 51.40  | 99.34  |
| Q9D023 | Brain protein 44                                                  | 345   | 5   | 91    | 1452 | 0.9290 | -1.16 | 20   | 8.81   | 7.80   | 0.00   | 3.55   | 23   | 7.88   | 0.00   | 3.74   | 11.86  |
| Q8BV14 | Dihydropteridine reductase                                        | 1272  | 18  | 1269  | 624  | 0.5527 | -1.16 | 269  | 77.05  | 38.99  | 88.61  | 63.93  | 313  | 66.94  | 103.34 | 72.89  | 69.68  |
| Q6URW6 | Myosin-14                                                         | 585   | 10  | 32    | 1437 | 0.5676 | -1.17 | 8    | 0.00   | 0.00   | 2.22   | 5.33   | 9    | 3.94   | 0.96   | 0.93   | 2.97   |
| Q91WD5 | NADH dehydrogenase [ubiquinone] iron-sulfur protein 2, mitochondr | 1006  | 14  | 303   | 535  | 0.2955 | -1.17 | 89   | 26.42  | 16.89  | 16.61  | 29.30  | 104  | 29.53  | 22.96  | 27.10  | 24.46  |
| Q9R0Q7 | Prostaglandin E synthase 3                                        | 359   | 5   | 186   | 766  | 0.4769 | -1.17 | 35   | 13.21  | 9.10   | 7.75   | 5.33   | 41   | 9.84   | 10.53  | 8.41   | 12.60  |
| P15532 | Nucleoside diphosphate kinase A                                   | 633   | 9   | 678   | 789  | 0.7361 | -1.17 | 116  | 24.22  | 29.89  | 34.33  | 27.53  | 136  | 21.66  | 21.05  | 37.38  | 55.60  |
| P12960 | Contactin-1                                                       | 2597  | 38  | 1828  | 562  | 0.4865 | -1.17 | 434  | 132.09 | 127.36 | 86.39  | 87.91  | 508  | 94.51  | 177.97 | 94.39  | 140.85 |
| Q9CZY3 | Ubiquitin-conjugating enzyme E2 variant 1                         | 200   | 3   | 145   | 1327 | 0.9692 | -1.17 | 33   | 11.01  | 7.80   | 7.75   | 6.22   | 38   | 15.75  | 2.87   | 13.08  | 6.67   |
| Q8CA95 | cAMP and cAMP-inhibited cGMP 3',5'-cyclic phosphodiesterase 10A   | 167   | 3   | 42    | 1536 | 0.6390 | -1.18 | 8    | 0.00   | 1.30   | 0.00   | 6.22   | 9    | 1.97   | 0.00   | 0.93   | 5.93   |
| Q62108 | Disks large homolog 4                                             | 907   | 12  | 418   | 394  | 0.1881 | -1.18 | 95   | 24.22  | 23.39  | 19.94  | 27.53  | 112  | 21.66  | 29.66  | 27.10  | 33.36  |
| Q68FD5 | Clathrin heavy chain 1                                            | 7106  | 98  | 10193 | 581  | 0.5143 | -1.18 | 1998 | 468.90 | 480.85 | 556.00 | 491.92 | 2349 | 332.75 | 712.85 | 623.33 | 680.52 |
| P51150 | Ras-related protein Rab-7a                                        | 958   | 15  | 731   | 642  | 0.5019 | -1.18 | 155  | 50.63  | 16.89  | 52.06  | 35.52  | 182  | 47.25  | 52.63  | 37.38  | 45.22  |
| Q9CPQ1 | Cytochrome c oxidase subunit 6C                                   | 315   | 5   | 59    | 1433 | 0.8719 | -1.18 | 31   | 15.41  | 10.40  | 4.43   | 0.89   | 37   | 17.72  | 0.00   | 1.87   | 17.05  |
| P05202 | Aspartate aminotransferase, mitochondrial                         | 1418  | 19  | 1431  | 667  | 0.6558 | -1.18 | 331  | 72.65  | 80.58  | 78.64  | 99.45  | 390  | 78.76  | 61.24  | 159.80 | 90.44  |
| P61750 | ADP-ribosylation factor 4                                         | 235   | 4   | 55    | 1279 | 0.8797 | -1.18 | 10   | 2.20   | 1.30   | 4.43   | 1.78   | 11   | 7.88   | 0.96   | 1.87   | 0.74   |
| P62908 | 40S ribosomal protein S3                                          | 603   | 9   | 369   | 634  | 0.5060 | -1.18 | 84   | 24.22  | 19.49  | 22.15  | 17.76  | 99   | 15.75  | 28.71  | 28.97  | 25.20  |
| Q03265 | ATP synthase subunit alpha, mitochondrial                         | 2268  | 29  | 4710  | 335  | 0.2728 | -1.18 | 1141 | 224.55 | 304.11 | 300.15 | 312.56 | 1349 | 338.66 | 396.14 | 255.13 | 359.53 |
| Q80XN0 | D-beta-hydroxybutyrate dehydrogenase, mitochondrial               | 840   | 12  | 385   | 613  | 0.4146 | -1.18 | 84   | 33.02  | 16.89  | 12.18  | 22.20  | 100  | 27.57  | 32.53  | 12.15  | 27.43  |
| Q8VEH3 | ADP-ribosylation factor-like protein 8A                           | 308   | 5   | 130   | 1415 | 0.8261 | -1.19 | 40   | 11.01  | 9.10   | 14.40  | 5.33   | 47   | 27.57  | 3.83   | 12.15  | 3.71   |
| O88712 | C-terminal-binding protein 1                                      | 418   | 6   | 162   | 1213 | 0.7931 | -1.19 | 40   | 6.60   | 11.70  | 7.75   | 14.21  | 48   | 7.88   | 13.40  | 20.56  | 5.93   |
| Q9Z1Z2 | Serine-threonine kinase receptor-associated protein               | 360   | 5   | 52    | 1307 | 0.9626 | -1.19 | 11   | 2.20   | 3.90   | 3.32   | 1.78   | 13   | 5.91   | 4.78   | 1.87   | 0.74   |
| O88935 | Synapsin-1                                                        | 1884  | 26  | 3250  | 445  | 0.3677 | -1.19 | 650  | 72.65  | 197.54 | 160.60 | 219.32 | 773  | 185.08 | 217.20 | 157.00 | 213.50 |
| Q9WTP7 | GTP:AMP phosphotransferase, mitochondrial                         | 518   | 8   | 238   | 838  | 0.4311 | -1.19 | 54   | 22.01  | 7.80   | 17.72  | 6.22   | 64   | 15.75  | 15.31  | 26.17  | 6.67   |
| Q9DBG3 | AP-2 complex subunit beta                                         | 1472  | 21  | 1096  | 696  | 0.7274 | -1.19 | 243  | 81.45  | 71.48  | 26.58  | 63.93  | 289  | 35.44  | 57.41  | 86.91  | 109.71 |
| P84104 | Splicing factor, arginine/serine-rich 3                           | 176   | 3   | 93    | 842  | 0.6005 | -1.19 | 18   | 6.60   | 3.90   | 4.43   | 2.66   | 21   | 3.94   | 8.61   | 4.67   | 3.71   |
| Q9D8N0 | Elongation factor 1-gamma                                         | 498   | 8   | 150   | 1263 | 0.8710 | -1.19 | 40   | 13.21  | 7.80   | 3.32   | 15.98  | 48   | 13.78  | 23.92  | 6.54   | 3.71   |
| Q9D2R6 | Coiled-coil domain-containing protein 56                          | 183   | 3   | 26    | 1533 | 0.9135 | -1.19 | 7    | 2.20   | 3.90   | 1.11   | 0.00   | 9    | 3.94   | 0.00   | 0.93   | 3.71   |
| P62242 | 40S ribosomal protein S8                                          | 294   | 4   | 188   | 932  | 0.7282 | -1.19 | 43   | 13.21  | 6.50   | 14.40  | 8.88   | 51   | 7.88   | 20.09  | 15.89  | 7.41   |
| P11499 | Heat shock protein HSP 90-beta                                    | 1319  | 19  | 1152  | 665  | 0.6732 | -1.19 | 256  | 68.24  | 66.28  | 40.98  | 80.80  | 306  | 53.16  | 115.78 | 87.85  | 48.93  |
| Q91VD9 | NADH-ubiquinone oxidoreductase 75 kDa subunit, mitochondrial      | 2119  | 30  | 1056  | 527  | 0.4709 | -1.19 | 248  | 46.23  | 68.88  | 66.45  | 66.60  | 296  | 51.19  | 122.48 | 61.68  | 60.79  |
| P35282 | Ras-related protein Rab-21                                        | 386   | 5   | 118   | 1397 | 0.7773 | -1.19 | 24   | 13.21  | 3.90   | 1.11   | 5.33   | 28   | 5.91   | 7.65   | 13.08  | 1.48   |
| P24369 | Peptidyl-prolyl cis-trans isomerase B                             | 429   | 7   | 160   | 846  | 0.3245 | -1.20 | 30   | 11.01  | 2.60   | 12.18  | 4.44   | 36   | 11.81  | 7.65   | 9.35   | 7.41   |
| P84091 | AP-2 complex subunit mu                                           | 718   | 12  | 367   | 830  | 0.4344 | -1.20 | 84   | 17.61  | 33.79  | 7.75   | 24.86  | 101  | 23.63  | 41.14  | 19.63  | 16.31  |
| Q9EQF6 | Dihydropyrimidinase-related protein 5                             | 646   | 10  | 179   | 1448 | 0.9515 | -1.20 | 40   | 8.81   | 11.70  | 4.43   | 15.09  | 48   | 11.81  | 24.88  | 8.41   | 2.97   |
| P18872 | Guanine nucleotide-binding protein G(o) subunit alpha             | 1676  | 25  | 1382  | 648  | 0.6628 | -1.20 | 375  | 88.06  | 113.07 | 84.18  | 89.68  | 450  | 161.45 | 59.32  | 117.75 | 111.94 |
| Q9QUM9 | Proteasome subunit alpha type-6                                   | 592   | 8   | 303   | 905  | 0.5251 | -1.20 | 58   | 30.82  | 5.20   | 9.97   | 12.43  | 70   | 17.72  | 26.79  | 13.08  | 12.60  |
| Q9CZ13 | Cytochrome b-c1 complex subunit 1, mitochondrial                  | 1051  | 13  | 996   | 509  | 0.4568 | -1.20 | 230  | 41.83  | 45.49  | 63.13  | 79.91  | 277  | 59.07  | 97.60  | 59.81  | 60.79  |
| Q9JJK2 | LanC-like protein 2                                               | 562   | 9   | 153   | 669  | 0.3903 | -1.20 | 33   | 8.81   | 3.90   | 6.65   | 13.32  | 39   | 9.84   | 10.53  | 9.35   | 9.64   |
| Q06185 | ATP synthase subunit e, mitochondrial                             | 348   | 4   | 274   | 1113 | 0.8144 | -1.21 | 106  | 33.02  | 27.29  | 33.23  | 12.43  | 128  | 47.25  | 1.91   | 25.23  | 53.37  |
| Q9QXS1 | Plectin                                                           | 8582  | 127 | 3337  | 405  | 0.3898 | -1.21 | 762  | 129.88 | 187.14 | 245.88 | 198.90 | 919  | 269.74 | 158.84 | 252.32 | 237.96 |
| Q9WTL7 | Acyl-protein thioesterase 2                                       | 420   | 6   | 164   | 984  | 0.4835 | -1.21 | 31   | 6.60   | 7.80   | 9.97   | 7.10   | 38   | 5.91   | 8.61   | 16.82  | 6.67   |
| P17183 | Gamma-enolase                                                     | 1809  | 24  | 2357  | 271  | 0.1795 | -1.21 | 476  | 121.08 | 80.58  | 131.80 | 142.96 | 576  | 149.64 | 122.48 | 176.63 | 126.76 |
| Q71PR4 | Alpha-actinin-1                                                   | 1079  | 16  | 508   | 329  | 0.1611 | -1.21 | 120  | 30.82  | 31.19  | 17.72  | 39.96  | 145  | 27.57  | 40.19  | 24.30  | 52.63  |
| Q64433 | 10 kDa heat shock protein, mitochondrial                          | 351   | 5   | 331   | 1264 | 0.6650 | -1.21 | 109  | 19.81  | 32.49  | 37.66  | 19.53  | 132  | 25.60  | 0.00   | 46.73  | 60.05  |
| P08551 | Neurofilament light polypeptide                                   | 1736  | 27  | 1759  | 438  | 0.3803 | -1.21 | 492  | 116.68 | 137.76 | 100.79 | 136.74 | 595  | 143.73 | 231.56 | 98.13  | 121.57 |
| P19157 | Glutathione S-transferase P 1                                     | 688   | 11  | 799   | 645  | 0.5481 | -1.21 | 161  | 46.23  | 24.69  | 45.41  | 44.40  | 195  | 49.22  | 68.89  | 40.18  | 36.32  |
| Q9JIS5 | Synaptic vesicle glycoprotein 2A                                  | 676   | 10  | 490   | 724  | 0.6177 | -1.21 | 100  | 26.42  | 22.09  | 24.37  | 26.64  |      |        |        |        |        |

|        |                                                                      |      |    |      |      |        |       |      |        |        |        |        |      |        |        |        |        |
|--------|----------------------------------------------------------------------|------|----|------|------|--------|-------|------|--------|--------|--------|--------|------|--------|--------|--------|--------|
| P46460 | Vesicle-fusing ATPase                                                | 2416 | 35 | 2254 | 501  | 0.4850 | -1.24 | 515  | 154.10 | 116.96 | 85.28  | 158.94 | 639  | 100.42 | 210.51 | 172.89 | 155.67 |
| Q9D1G5 | Leucine-rich repeat-containing protein 57                            | 149  | 2  | 64   | 1271 | 0.9586 | -1.24 | 11   | 2.20   | 2.60   | 4.43   | 1.78   | 14   | 0.00   | 2.87   | 5.61   | 5.19   |
| Q91Z61 | GTP-binding protein Di-Ras1                                          | 168  | 3  | 15   | 1547 | 0.8234 | -1.24 | 3    | 2.20   | 0.00   | 0.00   | 0.89   | 4    | 1.97   | 0.00   | 1.87   | 0.00   |
| Q9D898 | Actin-related protein 2/3 complex subunit 5-like protein             | 288  | 4  | 154  | 723  | 0.5029 | -1.24 | 28   | 6.60   | 5.20   | 12.18  | 4.44   | 35   | 5.91   | 7.65   | 8.41   | 13.34  |
| P33173 | Kinesin-like protein KIF1A                                           | 649  | 10 | 100  | 1259 | 0.9412 | -1.24 | 13   | 0.00   | 3.90   | 4.43   | 4.44   | 16   | 0.00   | 7.65   | 7.48   | 0.74   |
| Q9JLZ3 | Methylglutaconyl-CoA hydratase, mitochondrial                        | 431  | 7  | 214  | 778  | 0.5929 | -1.24 | 44   | 11.01  | 9.10   | 12.18  | 11.54  | 55   | 11.81  | 22.96  | 9.35   | 10.38  |
| Q9D0M3 | Cytochrome c1, heme protein, mitochondrial                           | 1442 | 17 | 909  | 503  | 0.4936 | -1.24 | 209  | 41.83  | 35.09  | 69.78  | 62.16  | 260  | 57.10  | 76.55  | 40.18  | 85.99  |
| Q9DAS9 | Guanine nucleotide-binding protein G(I)/G(S)/G(O) subunit gamma-1    | 249  | 4  | 63   | 1267 | 0.9520 | -1.24 | 25   | 8.81   | 7.80   | 8.86   | 0.00   | 32   | 5.91   | 0.00   | 2.80   | 22.98  |
| Q9Z0F7 | Gamma-synuclein                                                      | 251  | 4  | 126  | 1383 | 0.8125 | -1.25 | 25   | 2.20   | 13.00  | 9.97   | 0.00   | 31   | 9.84   | 0.00   | 11.21  | 10.38  |
| P35802 | Neuronal membrane glycoprotein M6-a                                  | 272  | 4  | 478  | 459  | 0.2953 | -1.25 | 101  | 39.63  | 22.09  | 16.61  | 23.09  | 127  | 31.50  | 40.19  | 18.69  | 36.32  |
| O08599 | Syntaxin-binding protein 1                                           | 2792 | 39 | 3949 | 327  | 0.2757 | -1.25 | 862  | 176.11 | 262.52 | 209.33 | 213.99 | 1077 | 198.86 | 315.76 | 185.97 | 376.58 |
| O70439 | Syntaxin-7                                                           | 145  | 2  | 19   | 1501 | 0.7187 | -1.25 | 8    | 4.40   | 0.00   | 3.32   | 0.00   | 10   | 3.94   | 4.78   | 0.93   | 0.00   |
| Q811D0 | Disks large homolog 1                                                | 503  | 8  | 112  | 990  | 0.5396 | -1.25 | 21   | 0.00   | 6.50   | 7.75   | 7.10   | 27   | 5.91   | 7.65   | 2.80   | 10.38  |
| P43006 | Excitatory amino acid transporter 2                                  | 1255 | 17 | 3238 | 266  | 0.2120 | -1.25 | 639  | 180.52 | 192.34 | 104.11 | 161.61 | 801  | 151.61 | 243.04 | 174.76 | 231.29 |
| Q61548 | Clathrin coat assembly protein AP180                                 | 709  | 11 | 771  | 619  | 0.5528 | -1.26 | 135  | 30.82  | 48.09  | 31.01  | 24.86  | 169  | 35.44  | 25.83  | 48.60  | 59.30  |
| Q99LB2 | Dehydrogenase/reductase SDR family member 4                          | 144  | 2  | 81   | 1282 | 0.9959 | -1.26 | 17   | 6.60   | 1.30   | 4.43   | 4.44   | 21   | 0.00   | 7.65   | 7.48   | 5.93   |
| Q6ZQI3 | Malectin                                                             | 291  | 4  | 18   | 1528 | 0.9539 | -1.26 | 7    | 0.00   | 2.60   | 3.32   | 0.89   | 9    | 5.91   | 1.91   | 0.00   | 0.74   |
| P60521 | Gamma-aminobutyric acid receptor-associated protein-like 2           | 195  | 3  | 107  | 1412 | 0.9103 | -1.26 | 21   | 4.40   | 10.40  | 3.32   | 2.66   | 26   | 5.91   | 0.00   | 4.67   | 15.57  |
| O54984 | ATPase Asn1                                                          | 265  | 4  | 76   | 1277 | 0.9900 | -1.26 | 12   | 2.20   | 5.20   | 2.22   | 2.66   | 15   | 3.94   | 0.00   | 5.61   | 5.93   |
| Q8BTG7 | Protein NDRG4                                                        | 196  | 3  | 27   | 1422 | 0.9430 | -1.26 | 9    | 4.40   | 1.30   | 0.00   | 3.55   | 12   | 7.88   | 2.87   | 0.93   | 0.00   |
| Q8BTX9 | Inactive hydroxysteroid dehydrogenase-like protein 1                 | 363  | 4  | 29   | 913  | 0.8078 | -1.26 | 12   | 4.40   | 3.90   | 1.11   | 2.66   | 15   | 9.84   | 0.00   | 4.67   | 0.74   |
| Q9R1Q8 | Transgelin-3                                                         | 973  | 14 | 1008 | 213  | 0.1638 | -1.27 | 180  | 41.83  | 32.49  | 56.49  | 48.84  | 227  | 55.13  | 56.45  | 50.46  | 65.23  |
| Q5NCF2 | Trafficking protein particle complex subunit 1                       | 130  | 2  | 35   | 1502 | 0.7430 | -1.27 | 7    | 4.40   | 2.60   | 0.00   | 0.00   | 9    | 1.97   | 0.00   | 4.67   | 2.22   |
| Q9WV92 | Band 4.1-like protein 3                                              | 1245 | 18 | 678  | 702  | 0.3975 | -1.27 | 123  | 8.81   | 44.19  | 53.16  | 16.87  | 156  | 45.29  | 31.58  | 42.05  | 37.07  |
| Q60771 | Claudin-11                                                           | 319  | 4  | 1097 | 484  | 0.4896 | -1.27 | 259  | 66.04  | 81.88  | 33.23  | 78.14  | 329  | 55.13  | 95.68  | 111.21 | 66.72  |
| P60202 | Myelin proteolipid protein                                           | 479  | 6  | 6480 | 268  | 0.2309 | -1.27 | 1582 | 440.29 | 309.31 | 393.19 | 439.53 | 2009 | 454.83 | 593.25 | 380.35 | 580.44 |
| P52503 | NADH dehydrogenase [ubiquinone] iron-sulfur protein 6, mitochondrial | 302  | 4  | 204  | 745  | 0.7388 | -1.27 | 52   | 13.21  | 16.89  | 13.29  | 8.88   | 66   | 17.72  | 0.00   | 13.08  | 35.58  |
| Q9D6M3 | Mitochondrial glutamate carrier 1                                    | 699  | 10 | 268  | 1065 | 0.8339 | -1.27 | 62   | 24.22  | 19.49  | 5.54   | 12.43  | 78   | 33.47  | 0.00   | 23.36  | 21.50  |
| P10639 | Thioredoxin                                                          | 269  | 4  | 202  | 1366 | 0.7915 | -1.27 | 42   | 11.01  | 11.70  | 14.40  | 5.33   | 54   | 9.84   | 0.00   | 19.63  | 24.46  |
| Q9QXS6 | Drebrin                                                              | 409  | 6  | 195  | 1009 | 0.5918 | -1.27 | 34   | 2.20   | 10.40  | 12.18  | 8.88   | 43   | 7.88   | 19.14  | 4.67   | 11.12  |
| Q5EBJ4 | Ermin                                                                | 265  | 4  | 81   | 728  | 0.5413 | -1.27 | 25   | 4.40   | 5.20   | 9.97   | 5.33   | 32   | 9.84   | 7.65   | 11.21  | 2.97   |
| Q9J175 | Ribosylidihydroxynicotinamide dehydrogenase [quinone]                | 166  | 3  | 7    | 1555 | 0.9381 | -1.27 | 2    | 2.20   | 0.00   | 0.00   | 0.00   | 3    | 0.00   | 0.00   | 2.80   | 0.00   |
| Q9CX34 | Suppressor of G2 allele of SKP1 homolog                              | 230  | 4  | 38   | 1496 | 0.6973 | -1.27 | 7    | 0.00   | 3.90   | 0.00   | 3.55   | 9    | 5.91   | 1.91   | 0.93   | 0.74   |
| Q99JX3 | Golgi reassembly-stacking protein 2                                  | 129  | 2  | 4    | 1541 | 0.8332 | -1.27 | 3    | 2.20   | 0.00   | 0.00   | 0.89   | 4    | 3.94   | 0.00   | 0.00   | 0.00   |
| Q9QXT0 | Protein canopy homolog 2                                             | 197  | 3  | 42   | 1078 | 0.3517 | -1.28 | 9    | 4.40   | 2.60   | 0.00   | 1.78   | 11   | 5.91   | 3.83   | 0.00   | 1.48   |
| P28663 | Beta-soluble NSF attachment protein                                  | 1744 | 24 | 1023 | 1031 | 0.9828 | -1.28 | 229  | 59.44  | 42.89  | 59.81  | 66.60  | 293  | 104.35 | 11.48  | 84.11  | 92.66  |
| P61089 | Ubiquitin-conjugating enzyme E2 N                                    | 298  | 4  | 414  | 1076 | 0.8581 | -1.28 | 80   | 22.01  | 19.49  | 19.94  | 18.65  | 103  | 23.63  | 6.70   | 33.64  | 38.55  |
| P12658 | Calbindin                                                            | 993  | 14 | 558  | 594  | 0.5499 | -1.28 | 112  | 26.42  | 14.30  | 37.66  | 33.74  | 144  | 19.69  | 49.76  | 47.66  | 26.69  |
| Q9Z2U1 | Proteasome subunit alpha type-5                                      | 791  | 11 | 390  | 550  | 0.4461 | -1.28 | 71   | 19.81  | 7.80   | 25.47  | 17.76  | 91   | 15.75  | 22.01  | 38.32  | 14.83  |
| Q6PHN9 | Ras-related protein Rab-35                                           | 473  | 7  | 346  | 290  | 0.1134 | -1.28 | 67   | 22.01  | 11.70  | 14.40  | 18.65  | 86   | 23.63  | 18.18  | 14.95  | 28.91  |
| Q99LS3 | Phosphoserine phosphatase                                            | 139  | 2  | 22   | 1538 | 0.7915 | -1.28 | 2    | 2.20   | 0.00   | 0.00   | 0.00   | 3    | 0.00   | 0.96   | 1.87   | 0.00   |
| Q9CQZ5 | NADH dehydrogenase [ubiquinone] 1 alpha subcomplex subunit 6         | 233  | 4  | 201  | 1361 | 0.8067 | -1.28 | 42   | 15.41  | 11.70  | 9.97   | 4.44   | 53   | 9.84   | 0.00   | 13.08  | 30.39  |
| P70349 | Histidine triad nucleotide-binding protein 1                         | 476  | 6  | 198  | 1180 | 0.8795 | -1.29 | 33   | 4.40   | 13.00  | 8.86   | 7.10   | 43   | 11.81  | 0.00   | 14.02  | 17.05  |
| Q9R1P0 | Proteasome subunit alpha type-4                                      | 601  | 9  | 296  | 914  | 0.6472 | -1.29 | 53   | 6.60   | 13.00  | 16.61  | 16.87  | 68   | 11.81  | 32.53  | 15.89  | 8.15   |
| P63168 | Dynein light chain 1, cytoplasmic                                    | 369  | 4  | 184  | 1243 | 0.7395 | -1.29 | 63   | 8.81   | 18.19  | 23.26  | 12.43  | 81   | 39.38  | 0.00   | 10.28  | 31.13  |
| Q9CR16 | Peptidyl-prolyl cis-trans isomerase D                                | 377  | 6  | 65   | 1240 | 0.9674 | -1.29 | 12   | 4.40   | 2.60   | 0.00   | 5.33   | 16   | 3.94   | 0.00   | 11.21  | 0.74   |
| P03930 | ATP synthase protein 8                                               | 123  | 2  | 73   | 1397 | 0.9046 | -1.29 | 24   | 6.60   | 5.20   | 11.08  | 0.89   | 31   | 9.84   | 1.91   | 1.87   | 17.05  |
| P05064 | Fructose-bisphosphate aldolase A                                     | 1462 | 20 | 3063 | 130  | 0.0436 | -1.30 | 601  | 116.68 | 139.06 | 189.39 | 156.28 | 782  | 161.45 | 198.07 | 261.67 | 160.86 |
| Q9QXZ0 | Microtubule-actin cross-linking factor 1                             | 4311 | 68 | 653  | 864  | 0.6625 | -1.30 | 153  | 44.03  | 44.19  | 19.94  | 45.28  | 200  | 84.66  | 21.05  | 56.07  | 37.81  |
| Q9EQ20 | Methylmalonate-semialdehyde dehydrogenase [acylating], mitochondrial | 624  | 10 | 152  | 1044 | 0.6690 | -1.31 | 42   | 11.01  | 14.30  | 4.43   | 12.43  | 55   | 11.81  | 27.75  | 10.28  | 5.19   |
| Q8BWR2 | UPF0424 protein C1orf128 homolog                                     | 338  | 5  | 70   | 1337 | 0.7818 | -1.31 | 12   | 4.40   | 0.00   | 5.54   | 1.78   | 15   | 3.94   | 6.70   | 4.67   | 0.00   |
| Q8VBV7 | COP9 signalosome complex subunit 8                                   | 371  | 5  | 104  | 627  | 0.4285 | -1.31 | 25   | 6.60   | 5.20   | 9.97   | 3.55   | 33   | 7.88   | 11.48  | 5.61   | 8.15   |
| Q9JKK7 | Tropomodulin-2                                                       | 381  | 6  | 162  | 344  | 0.1011 | -1.31 | 45   | 8.81   | 11.70  | 16.61  | 7.99   | 59   | 11.81  | 17.22  | 15.89  | 14.08  |
| Q7TMM9 | Tubulin beta-2A chain                                                | 165  | 2  | 354  | 352  | 0.2154 | -1.31 | 87   | 30.82  | 22.09  | 16.61  | 17.76  | 114  | 37.41  | 27.75  | 14.95  | 34.10  |
| P61971 | Nuclear transport factor 2                                           | 243  | 4  | 36   | 1360 | 0.8338 | -1.31 | 9    | 4.40   | 2.60   | 2.22   | 0.00   | 12   | 5.91   | 0.00   | 4.67   | 1.48   |
| Q61885 | Myelin-oligodendrocyte glycoprotein                                  | 693  | 10 | 1059 | 190  | 0.1647 | -1.31 | 251  | 74.85  | 55.88  | 60.92  | 59.49  | 329  | 66.94  | 97.60  | 74.76  | 89.70  |
| O35621 | Phosphomannosylase 1                                                 | 252  | 4  | 24   | 1229 | 0.3603 | -1.31 | 6    | 4.40   | 1.30   | 0.00   | 0.00   | 7    | 1.97   | 3.83   | 0.93   | 0.74   |
| Q3UIU2 | NADH dehydrogenase [ubiquinone] 1 beta subcomplex subunit 6          | 221  | 4  | 178  | 1111 | 0.7821 | -1.31 | 34   | 6.60   | 11.70  | 5.54   | 10.66  | 45   | 15.75  | 2.87   | 10.28  | 16.31  |
| P02463 | Collagen alpha-1(IV) chain                                           | 323  | 5  | 35   | 1468 | 0.9482 | -1.32 | 6    | 0.00   | 1.30   | 2.22   | 2.66   | 8    | 5.91   | 0.00   | 0.00   | 2.22   |
| Q8BG05 | Heterogeneous nuclear ribonucleoprotein A3                           | 822  | 12 | 440  | 559  | 0.5452 | -1.32 | 116  | 30.82  | 33.79  | 17.72  | 33.74  | 153  | 39.38  | 29.66  | 60.74  | 22.98  |
| Q9R257 | Heme-binding protein 1                                               | 639  | 9  | 264  | 598  | 0.5386 | -1.32 | 53   | 8.81   | 11.70  | 23.26  | 8.88   | 69   | 15.75  | 28.71  | 9.35   | 15.57  |
| Q9CRY7 | Glycerophosphodiester phosphodiesterase domain-containing protein    | 140  | 2  | 8    | 1483 | 0.4406 | -1.32 | 4    | 4.40   | 0.00   | 0.00   | 0.00   | 6    | 3.94   | 0.00   | 1.87   | 0.00   |
| Q7TME3 | NADH dehydrogenase [ubiquinone] 1 alpha subcomplex subunit 12        | 665  | 11 | 319  | 972  | 0.7626 | -1.32 | 68   | 13.21  | 18.19  | 21.04  | 15.09  | 89   | 35.44  | 12.44  | 9.35   | 31.88  |
| P16054 | Protein kinase C epsilon type                                        | 371  | 6  | 44   | 939  | 0.5444 | -1.32 | 10   | 0.00   | 3.90   | 0.00   | 6.22   | 13   | 0.00   | 4.78   | 5.61   | 2.97   |
| Q61206 | Platelet-activating factor acetylhydrolase 1B subunit beta           | 310  | 5  | 205  | 1064 | 0.7245 | -1.32 | 41   | 11.01  | 5.20   | 8.86   | 15.98  | 54   | 3.94   | 22.01  | 11.21  | 17.05  |
| P62827 | GTP-binding nuclear protein Ran                                      | 235  | 4  | 146  | 773  | 0.3767 | -1.32 | 31   | 15.41  | 3.90   | 6.65   | 5.33   | 41   | 7.88   | 10.53  | 14.02  | 8.90   |
| Q9D1C8 | Vacuolar protein sorting-associated protein 28 homolog               | 404  | 7  | 37   | 1427 | 0.7773 | -1.32 | 9    | 4.40   | 0.00   | 0.00   | 4.44   | 12   | 7.88   | 2.87   | 0.93   | 0.00   |
| Q9CZR8 | Elongation factor Ts, mitochondrial                                  | 450  | 6  | 131  | 567  | 0.3879 | -1.32 | 25   | 4.40   | 5.20   | 8.86   | 6.22   | 33   | 5.91   | 11.48  | 5.61   | 9.64   |
| O55234 | Proteasome subunit beta type-5                                       | 1154 | 16 | 371  | 476  | 0.2619 | -1.32 | 47   | 13.21  | 9.10   | 9.97   | 15.09  | 63   | 17.72  | 20.09  | 9.35   | 15.57  |
| Q9CQV1 | Mitochondrial import inner membrane translocase subunit Tim16        | 156  | 2  | 46   | 1497 | 0.7824 | -1.33 | 7    | 0.00   | 2.60   | 4.43   | 0.00   | 9    | 3.94   | 0.00   | 0.93   | 4.45   |
| Q9CYR6 | Phosphoacetylglucosamine mutase                                      | 178  | 3  | 4    | 1484 | 0.4572 | -1.33 | 2    | 2.20   | 0.00   | 0.00   | 0.00   | 3    | 1.97   | 0.96   | 0.00   | 0.00   |
| Q78IK2 | Up-regulated during skeletal muscle growth protein 5                 | 168  | 2  | 80   | 858  | 0.8158 | -1.33 | 27   | 6.60   | 7.80   | 9.97   | 2.66   | 36   | 11.81  | 0.96   | 0.93   | 22.24  |
| O09061 | Proteasome subunit beta type-1                                       | 774  | 11 |      |      |        |       |      |        |        |        |        |      |        |        |        |        |

|        |                                                                        |      |    |      |      |        |       |      |        |        |        |        |      |        |        |        |        |
|--------|------------------------------------------------------------------------|------|----|------|------|--------|-------|------|--------|--------|--------|--------|------|--------|--------|--------|--------|
| Q3UUI3 | Thioesterase superfamily member 4                                      | 283  | 4  | 141  | 717  | 0.3403 | -1.38 | 22   | 8.81   | 5.20   | 6.65   | 0.89   | 30   | 5.91   | 9.57   | 7.48   | 6.67   |
| Q7T5J2 | Microtubule-associated protein 6                                       | 907  | 14 | 433  | 870  | 0.6804 | -1.38 | 97   | 15.41  | 28.59  | 42.09  | 10.66  | 133  | 57.10  | 28.71  | 10.28  | 37.07  |
| Q61081 | Hsp90 co-chaperone Cdc37                                               | 234  | 4  | 58   | 1026 | 0.7402 | -1.38 | 15   | 6.60   | 1.30   | 2.22   | 4.44   | 20   | 9.84   | 5.74   | 3.74   | 0.74   |
| Q9Z1S5 | Neuronal-specific septin-3                                             | 418  | 6  | 176  | 661  | 0.2642 | -1.38 | 34   | 6.60   | 14.30  | 2.22   | 10.66  | 47   | 5.91   | 17.22  | 9.35   | 14.08  |
| Q9J146 | Diphosphoinositol polyphosphate phosphohydrolase 1                     | 315  | 5  | 170  | 971  | 0.6629 | -1.38 | 29   | 8.81   | 6.50   | 4.43   | 8.88   | 40   | 13.78  | 15.31  | 7.48   | 2.97   |
| Q99KB8 | Hydroxyacylglutathione hydrolase, mitochondrial                        | 507  | 8  | 134  | 1001 | 0.7152 | -1.38 | 31   | 11.01  | 5.20   | 8.86   | 6.22   | 43   | 11.81  | 21.05  | 3.74   | 6.67   |
| Q9WUL7 | ADP-ribosylation factor-like protein 3                                 | 563  | 8  | 197  | 353  | 0.1670 | -1.38 | 30   | 6.60   | 5.20   | 9.97   | 7.99   | 41   | 5.91   | 10.53  | 12.15  | 12.60  |
| Q99LC3 | NADH dehydrogenase [ubiquinone] 1 alpha subcomplex subunit 10          | 634  | 10 | 483  | 852  | 0.6758 | -1.38 | 108  | 17.61  | 24.69  | 29.90  | 35.52  | 149  | 21.66  | 11.48  | 66.35  | 49.67  |
| P62897 | Cytochrome c, somatic                                                  | 535  | 8  | 851  | 749  | 0.7104 | -1.38 | 184  | 57.24  | 55.88  | 45.41  | 25.75  | 255  | 92.54  | 0.00   | 55.14  | 107.49 |
| Q61937 | Nucleophosmin                                                          | 376  | 6  | 174  | 1296 | 0.7887 | -1.39 | 28   | 0.00   | 3.90   | 14.40  | 9.77   | 39   | 17.72  | 0.00   | 9.35   | 11.86  |
| Q9D1G1 | Ras-related protein Rab-1B                                             | 453  | 7  | 413  | 309  | 0.2221 | -1.39 | 83   | 28.62  | 10.40  | 26.58  | 17.76  | 116  | 31.50  | 23.92  | 22.43  | 37.81  |
| Q8BK64 | Activator of 90 kDa heat shock protein ATPase homolog 1                | 298  | 4  | 275  | 1315 | 0.8374 | -1.39 | 44   | 6.60   | 10.40  | 11.08  | 15.98  | 61   | 3.94   | 6.70   | 32.71  | 17.79  |
| O88696 | Putative ATP-dependent Clp protease proteolytic subunit, mitochondrial | 456  | 6  | 138  | 397  | 0.2164 | -1.39 | 31   | 11.01  | 3.90   | 9.97   | 6.22   | 43   | 11.81  | 10.53  | 14.95  | 5.93   |
| Q8BNY6 | Neuronal calcium sensor 1                                              | 361  | 6  | 64   | 1384 | 0.9877 | -1.39 | 13   | 6.60   | 1.30   | 1.11   | 3.55   | 17   | 9.84   | 6.70   | 0.93   | 0.00   |
| Q9D880 | Mitochondrial import inner membrane translocase subunit TIM50          | 185  | 3  | 7    | 1527 | 0.8558 | -1.39 | 4    | 2.20   | 1.30   | 0.00   | 0.00   | 5    | 3.94   | 0.00   | 0.93   | 0.00   |
| P48962 | ADP/ATP translocase 1                                                  | 753  | 11 | 1770 | 88   | 0.0257 | -1.39 | 387  | 116.68 | 100.07 | 85.28  | 85.24  | 539  | 165.39 | 119.61 | 108.41 | 146.04 |
| P50518 | V-type proton ATPase subunit E 1                                       | 861  | 13 | 664  | 419  | 0.4352 | -1.39 | 116  | 37.42  | 16.89  | 38.76  | 23.09  | 162  | 27.57  | 61.24  | 30.84  | 42.25  |
| Q9CQD1 | Ras-related protein Rab-5A                                             | 556  | 7  | 306  | 230  | 0.1237 | -1.39 | 72   | 19.81  | 11.70  | 25.47  | 15.09  | 100  | 25.60  | 27.75  | 27.10  | 20.02  |
| Q9DB20 | ATP synthase subunit O, mitochondrial                                  | 992  | 13 | 1716 | 243  | 0.2621 | -1.39 | 329  | 68.24  | 46.79  | 127.37 | 86.13  | 458  | 80.73  | 124.39 | 98.13  | 154.93 |
| P62889 | 60S ribosomal protein L30                                              | 331  | 5  | 183  | 1312 | 0.8420 | -1.39 | 33   | 13.21  | 14.30  | 5.54   | 0.00   | 46   | 19.69  | 0.00   | 9.35   | 17.05  |
| Q9Z2H5 | Band 4.1-like protein 1                                                | 631  | 9  | 183  | 1147 | 0.5403 | -1.39 | 22   | 2.20   | 6.50   | 11.08  | 1.78   | 30   | 13.78  | 2.87   | 7.48   | 5.93   |
| P00493 | Hypoxanthine-guanine phosphoribosyltransferase                         | 702  | 10 | 446  | 165  | 0.0126 | -1.40 | 79   | 19.81  | 13.00  | 27.69  | 18.65  | 111  | 29.53  | 22.01  | 33.64  | 25.95  |
| Q9DBP5 | UMP-CMP kinase                                                         | 541  | 8  | 271  | 304  | 0.1191 | -1.41 | 43   | 11.01  | 11.70  | 12.18  | 7.99   | 60   | 9.84   | 20.09  | 17.76  | 12.60  |
| Q9DCS9 | NADH dehydrogenase [ubiquinone] 1 beta subcomplex subunit 10           | 690  | 10 | 593  | 178  | 0.1469 | -1.41 | 130  | 35.22  | 22.09  | 37.66  | 34.63  | 182  | 41.35  | 54.54  | 44.86  | 41.51  |
| Q9CYR0 | Single-stranded DNA-binding protein, mitochondrial                     | 218  | 3  | 51   | 1474 | 0.7177 | -1.41 | 6    | 2.20   | 3.90   | 0.00   | 0.00   | 9    | 3.94   | 0.00   | 0.93   | 3.71   |
| O55125 | Protein NipSnap homolog 1                                              | 342  | 6  | 254  | 644  | 0.5489 | -1.41 | 44   | 17.61  | 6.50   | 11.08  | 8.88   | 62   | 11.81  | 22.96  | 6.54   | 20.76  |
| P68510 | 14-3-3 protein eta                                                     | 798  | 10 | 742  | 169  | 0.1229 | -1.41 | 149  | 35.22  | 25.99  | 47.63  | 47.63  | 210  | 51.19  | 59.32  | 57.01  | 42.25  |
| Q9CQM9 | Glutaredoxin-3                                                         | 229  | 4  | 35   | 924  | 0.6412 | -1.42 | 10   | 6.60   | 2.60   | 0.00   | 0.89   | 14   | 3.94   | 3.83   | 6.54   | 0.00   |
| O55057 | Retinal rod rhodopsin-sensitive cGMP 3',5'-cyclic phosphodiesterase s  | 205  | 3  | 38   | 1219 | 0.6912 | -1.42 | 7    | 0.00   | 3.90   | 0.00   | 3.55   | 11   | 5.91   | 0.96   | 0.00   | 3.71   |
| P61264 | Syntaxin-1B                                                            | 1645 | 25 | 1925 | 87   | 0.0337 | -1.42 | 403  | 79.25  | 94.87  | 117.40 | 111.88 | 572  | 139.79 | 139.70 | 129.90 | 163.09 |
| Q9D172 | ES1 protein homolog, mitochondrial                                     | 449  | 7  | 328  | 223  | 0.1245 | -1.42 | 67   | 15.41  | 11.70  | 25.47  | 14.21  | 95   | 15.75  | 24.88  | 28.97  | 25.20  |
| P49722 | Proteasome subunit alpha type-2                                        | 721  | 10 | 326  | 569  | 0.3151 | -1.42 | 65   | 17.61  | 18.19  | 18.83  | 10.66  | 93   | 15.75  | 22.96  | 42.99  | 11.12  |
| Q8BMA6 | Signal recognition particle 68 kDa protein                             | 175  | 3  | 70   | 1379 | 0.7294 | -1.42 | 20   | 0.00   | 13.00  | 4.43   | 2.66   | 29   | 19.69  | 4.78   | 1.87   | 2.22   |
| Q8BGX2 | Uncharacterized protein C19orf52 homolog                               | 199  | 3  | 24   | 970  | 0.4201 | -1.42 | 6    | 2.20   | 0.00   | 0.00   | 3.55   | 8    | 1.97   | 2.87   | 1.87   | 1.48   |
| P62334 | 26S protease regulatory subunit 10B                                    | 408  | 7  | 41   | 1351 | 0.9480 | -1.43 | 9    | 2.20   | 1.30   | 3.32   | 1.78   | 12   | 5.91   | 0.00   | 5.61   | 0.74   |
| Q91XM9 | Disks large homolog 2                                                  | 254  | 4  | 154  | 590  | 0.2123 | -1.43 | 37   | 2.20   | 10.40  | 6.65   | 17.76  | 53   | 11.81  | 13.40  | 12.15  | 15.57  |
| Q6PIC6 | Sodium/potassium-transporting ATPase subunit alpha-3                   | 2334 | 31 | 7125 | 73   | 0.0183 | -1.43 | 1467 | 369.84 | 347.00 | 306.80 | 443.08 | 2102 | 466.64 | 589.42 | 487.82 | 558.20 |
| P68254 | 14-3-3 protein theta                                                   | 965  | 13 | 910  | 195  | 0.1990 | -1.44 | 179  | 55.04  | 22.09  | 64.24  | 37.29  | 257  | 74.82  | 66.98  | 54.20  | 60.79  |
| O70252 | Heme oxygenase 2                                                       | 176  | 3  | 20   | 880  | 0.9449 | -1.44 | 8    | 2.20   | 1.30   | 2.22   | 2.66   | 12   | 5.91   | 0.00   | 4.67   | 1.48   |
| Q9ERS2 | NADH dehydrogenase [ubiquinone] 1 alpha subcomplex subunit 13          | 771  | 12 | 619  | 1159 | 0.8357 | -1.44 | 114  | 24.22  | 41.59  | 38.76  | 9.77   | 165  | 45.29  | 0.00   | 39.25  | 80.06  |
| Q62446 | Peptidyl-prolyl cis-trans isomerase FKBP3                              | 181  | 3  | 19   | 1324 | 0.2784 | -1.44 | 4    | 2.20   | 1.30   | 0.00   | 0.89   | 6    | 1.97   | 2.87   | 0.00   | 1.48   |
| Q9CXZ1 | NADH dehydrogenase [ubiquinone] iron-sulfur protein 4, mitochondr      | 251  | 4  | 149  | 920  | 0.6498 | -1.44 | 31   | 6.60   | 5.20   | 8.86   | 10.66  | 45   | 13.78  | 1.91   | 16.82  | 12.60  |
| Q9CQ22 | RhoA activator C11orf59 homolog                                        | 359  | 5  | 28   | 1011 | 0.4169 | -1.44 | 8    | 4.40   | 1.30   | 2.22   | 0.00   | 11   | 5.91   | 3.83   | 0.93   | 0.74   |
| Q66GT5 | Protein-tyrosine phosphatase mitochondrial 1                           | 183  | 3  | 10   | 1539 | 0.9712 | -1.44 | 6    | 2.20   | 3.90   | 0.00   | 0.00   | 9    | 7.88   | 0.00   | 0.93   | 0.00   |
| P70699 | Lysosomal alpha-glucosidase                                            | 223  | 4  | 25   | 1492 | 0.5987 | -1.45 | 4    | 0.00   | 3.90   | 0.00   | 0.00   | 6    | 3.94   | 0.96   | 0.00   | 0.74   |
| P56135 | ATP synthase subunit f, mitochondrial                                  | 331  | 4  | 280  | 579  | 0.3499 | -1.45 | 86   | 26.42  | 27.29  | 9.97   | 22.20  | 124  | 35.44  | 18.18  | 14.95  | 55.60  |
| Q922B1 | MACRO domain-containing protein 1                                      | 417  | 5  | 120  | 834  | 0.5385 | -1.45 | 21   | 6.60   | 3.90   | 4.43   | 6.22   | 31   | 7.88   | 14.35  | 4.67   | 3.71   |
| Q80X14 | Phosphatidylinositol-5-phosphate 4-kinase type-2 beta                  | 162  | 2  | 20   | 1494 | 0.8766 | -1.45 | 6    | 2.20   | 0.00   | 1.11   | 2.66   | 9    | 1.97   | 5.74   | 0.93   | 0.00   |
| P62204 | Calmodulin                                                             | 630  | 7  | 1196 | 195  | 0.2135 | -1.45 | 197  | 70.45  | 41.59  | 68.67  | 15.98  | 285  | 76.79  | 44.97  | 99.99  | 63.01  |
| Q91VN4 | Coiled-coil-helix-coiled-coil-helix domain-containing protein 6        | 340  | 5  | 85   | 1318 | 0.8972 | -1.45 | 24   | 8.81   | 5.20   | 4.43   | 5.33   | 34   | 17.72  | 0.00   | 5.61   | 11.12  |
| P32037 | Solute carrier family 2, facilitated glucose transporter member 3      | 189  | 3  | 61   | 621  | 0.2611 | -1.45 | 13   | 6.60   | 2.60   | 1.11   | 2.66   | 19   | 5.91   | 2.87   | 5.61   | 4.45   |
| Q91X97 | Neurocalcin-delta                                                      | 601  | 7  | 386  | 278  | 0.2054 | -1.45 | 74   | 24.22  | 9.10   | 16.61  | 23.97  | 107  | 23.63  | 29.66  | 28.04  | 25.95  |
| P61082 | NEDD8-conjugating enzyme Ubc12                                         | 226  | 4  | 138  | 873  | 0.2663 | -1.45 | 22   | 13.21  | 3.90   | 1.11   | 3.55   | 32   | 9.84   | 12.44  | 5.61   | 3.71   |
| Q02248 | Catenin beta-1                                                         | 748  | 10 | 143  | 450  | 0.3388 | -1.45 | 31   | 4.40   | 11.70  | 5.54   | 8.88   | 44   | 13.78  | 8.61   | 5.61   | 16.31  |
| Q62425 | NADH dehydrogenase [ubiquinone] 1 alpha subcomplex subunit 4           | 196  | 3  | 227  | 1271 | 0.9684 | -1.45 | 72   | 17.61  | 24.69  | 18.83  | 10.66  | 104  | 29.53  | 1.91   | 18.69  | 54.12  |
| P50171 | Estradiol 17-beta-dehydrogenase 8                                      | 329  | 5  | 45   | 918  | 0.6650 | -1.45 | 11   | 4.40   | 0.00   | 2.22   | 4.44   | 16   | 3.94   | 7.65   | 3.74   | 0.74   |
| Q921F2 | TAR DNA-binding protein 43                                             | 411  | 6  | 128  | 755  | 0.4549 | -1.45 | 25   | 2.20   | 5.20   | 4.43   | 13.32  | 37   | 7.88   | 6.70   | 16.82  | 5.19   |
| Q9CXW4 | 60S ribosomal protein L11                                              | 239  | 4  | 96   | 390  | 0.2560 | -1.46 | 17   | 6.60   | 2.60   | 2.22   | 5.33   | 24   | 5.91   | 8.61   | 4.67   | 5.19   |
| Q9D358 | Low molecular weight phosphotyrosine protein phosphatase               | 558  | 8  | 329  | 363  | 0.3647 | -1.46 | 56   | 22.01  | 10.40  | 11.08  | 12.43  | 81   | 21.66  | 19.14  | 31.77  | 8.90   |
| Q8BNW9 | Kelch repeat and BTB domain-containing protein 11                      | 350  | 6  | 25   | 1513 | 0.7437 | -1.46 | 5    | 0.00   | 5.20   | 0.00   | 0.00   | 8    | 1.97   | 0.00   | 5.61   | 0.00   |
| P62137 | Serine/threonine-protein phosphatase PP1-alpha catalytic subunit       | 167  | 3  | 34   | 1522 | 0.8356 | -1.46 | 7    | 4.40   | 1.30   | 0.00   | 0.89   | 10   | 5.91   | 0.00   | 0.00   | 3.71   |
| P17751 | Triosephosphate isomerase                                              | 1089 | 13 | 2157 | 191  | 0.2242 | -1.46 | 408  | 112.27 | 57.18  | 139.55 | 98.56  | 595  | 106.32 | 176.06 | 146.72 | 166.05 |
| Q9DB73 | NADH-cytochrome b5 reductase 1                                         | 285  | 5  | 31   | 1352 | 0.9883 | -1.46 | 8    | 2.20   | 1.30   | 0.00   | 4.44   | 12   | 7.88   | 0.00   | 3.74   | 0.00   |
| Q99LY9 | NADH dehydrogenase [ubiquinone] iron-sulfur protein 5                  | 328  | 5  | 205  | 1132 | 0.9814 | -1.47 | 32   | 11.01  | 13.00  | 4.43   | 3.55   | 47   | 13.78  | 0.00   | 16.82  | 16.31  |
| Q921J2 | GTP-binding protein Rheb                                               | 139  | 2  | 29   | 1349 | 0.3669 | -1.47 | 5    | 2.20   | 1.30   | 1.11   | 0.00   | 7    | 3.94   | 0.96   | 1.87   | 0.00   |
| Q8C996 | Transmembrane protein 163                                              | 186  | 3  | 19   | 1449 | 0.9905 | -1.47 | 5    | 0.00   | 1.30   | 2.22   | 1.78   | 8    | 5.91   | 0.00   | 1.87   | 0.00   |
| Q78IK4 | Apolipoprotein O-like                                                  | 162  | 2  | 30   | 1476 | 0.5393 | -1.47 | 4    | 0.00   | 2.60   | 0.00   | 1.78   | 6    | 0.00   | 3.83   | 1.87   | 0.74   |
| P68037 | Ubiquitin-conjugating enzyme E2 L3                                     | 335  | 4  | 404  | 264  | 0.1943 | -1.48 | 71   | 11.01  | 10.40  | 27.69  | 22.20  | 105  | 15.75  | 32.53  | 24.30  | 32.62  |
| P57746 | V-type proton ATPase subunit D                                         | 599  | 9  | 361  | 230  | 0.2164 | -1.48 | 61   | 15.41  | 10.40  | 18.83  | 15.98  | 90   | 21.66  | 27.75  | 14.95  | 25.20  |
| Q9QZ88 | Vacuolar protein sorting-associated protein 29                         | 240  | 4  | 128  | 786  | 0.5084 | -1.48 | 19   | 4.40   | 6.50   | 3.32   | 4.44   | 28   | 11.81  | 5.74   | 1.87   | 8.15   |
| Q9CQB5 | CDGSH iron-sulfur domain-containing protein 2                          | 206  | 3  | 43   | 1024 | 0.8391 | -1.48 | 11   | 2.20   | 5.20   | 2.22   | 0.89   | 16   | 11.81  | 0.00   | 0.00   | 3.71   |
| P62702 | 40S ribosomal protein S4, X isoform                                    | 563  | 8  | 255  | 752  | 0.4657 | -1.48 | 50   | 19.81  | 7.80   | 13.29  | 8.88   | 74   | 17.72  | 32.53  | 16.82  |        |

|        |                                                                      |      |    |      |      |        |       |     |        |       |        |        |     |        |        |        |        |
|--------|----------------------------------------------------------------------|------|----|------|------|--------|-------|-----|--------|-------|--------|--------|-----|--------|--------|--------|--------|
| Q99LX0 | Protein DJ-1                                                         | 1024 | 15 | 935  | 236  | 0.2626 | -1.56 | 158 | 52.83  | 22.09 | 43.20  | 39.96  | 246 | 39.38  | 81.33  | 57.01  | 68.20  |
| Q9DCT2 | NADH dehydrogenase [ubiquinone] iron-sulfur protein 3, mitochondrial | 789  | 11 | 811  | 354  | 0.4627 | -1.56 | 156 | 39.63  | 15.60 | 54.27  | 46.17  | 242 | 19.69  | 75.59  | 57.94  | 88.96  |
| P62835 | Ras-related protein Rap-1A                                           | 386  | 6  | 83   | 1294 | 0.9362 | -1.56 | 17  | 6.60   | 2.60  | 5.54   | 2.66   | 27  | 11.81  | 13.40  | 1.87   | 0.00   |
| Q8BZA9 | Probable fructose-2,6-bisphosphatase TIGAR                           | 187  | 3  | 25   | 1517 | 0.8610 | -1.56 | 6   | 4.40   | 0.00  | 0.00   | 1.78   | 10  | 1.97   | 7.65   | 0.00   | 0.00   |
| P63101 | 14-3-3 protein zeta/delta                                            | 1285 | 17 | 2467 | 120  | 0.1744 | -1.56 | 462 | 129.88 | 81.88 | 141.77 | 108.33 | 722 | 198.86 | 192.33 | 110.27 | 220.17 |
| Q8BLQ9 | Cell adhesion molecule 2                                             | 334  | 5  | 190  | 315  | 0.2253 | -1.57 | 37  | 4.40   | 10.40 | 12.18  | 9.77   | 58  | 17.72  | 13.40  | 10.28  | 16.31  |
| Q8JZS0 | Protein lin-7 homolog A                                              | 259  | 4  | 68   | 958  | 0.4325 | -1.57 | 12  | 6.60   | 1.30  | 2.22   | 1.78   | 19  | 1.97   | 5.74   | 6.54   | 4.45   |
| P47809 | Dual specificity mitogen-activated protein kinase kinase 4           | 208  | 4  | 53   | 1050 | 0.5360 | -1.57 | 9   | 0.00   | 2.60  | 4.43   | 1.78   | 14  | 3.94   | 0.96   | 7.48   | 1.48   |
| P63213 | Guanine nucleotide-binding protein G(I)/G(S)/G(O) subunit gamma-2    | 176  | 3  | 64   | 869  | 0.6783 | -1.57 | 19  | 4.40   | 7.80  | 6.65   | 0.00   | 30  | 0.00   | 0.00   | 0.00   | 29.65  |
| Q9CQX2 | Cytochrome b5 type B                                                 | 148  | 2  | 88   | 294  | 0.1857 | -1.57 | 17  | 4.40   | 3.90  | 5.54   | 2.66   | 26  | 9.84   | 4.78   | 4.67   | 6.67   |
| Q8C163 | Nuclease EXOG, mitochondrial                                         | 202  | 3  | 40   | 949  | 0.4279 | -1.58 | 11  | 0.00   | 0.00  | 3.32   | 5.33   | 18  | 0.00   | 9.57   | 3.74   | 4.45   |
| Q5DU25 | IQ motif and SEC7 domain-containing protein 2                        | 219  | 4  | 12   | 1520 | 0.8983 | -1.58 | 4   | 0.00   | 0.00  | 3.32   | 0.89   | 7   | 5.91   | 0.00   | 0.00   | 0.74   |
| P62855 | 40S ribosomal protein S26                                            | 196  | 3  | 154  | 802  | 0.5921 | -1.59 | 23  | 6.60   | 6.50  | 7.75   | 1.78   | 36  | 9.84   | 1.91   | 9.35   | 14.83  |
| P67871 | Casein kinase II subunit beta                                        | 420  | 7  | 186  | 618  | 0.3411 | -1.59 | 34  | 11.01  | 3.90  | 5.54   | 13.32  | 54  | 9.84   | 18.18  | 16.82  | 8.90   |
| O70503 | Estradiol 17-beta-dehydrogenase 12                                   | 479  | 7  | 122  | 799  | 0.2656 | -1.59 | 26  | 15.41  | 2.60  | 2.22   | 5.33   | 41  | 11.81  | 15.31  | 8.41   | 5.19   |
| P62821 | Ras-related protein Rab-1A                                           | 350  | 5  | 425  | 197  | 0.1645 | -1.59 | 75  | 22.01  | 14.30 | 26.58  | 12.43  | 120 | 31.50  | 34.45  | 21.49  | 32.62  |
| O70435 | Proteasome subunit alpha type-3                                      | 407  | 6  | 123  | 922  | 0.4071 | -1.59 | 17  | 8.81   | 1.30  | 2.22   | 4.44   | 27  | 5.91   | 12.44  | 4.67   | 3.71   |
| Q9CQV8 | 14-3-3 protein beta/alpha                                            | 772  | 10 | 754  | 143  | 0.1061 | -1.60 | 131 | 24.22  | 20.79 | 46.52  | 39.96  | 210 | 61.04  | 50.71  | 48.60  | 49.67  |
| Q6ZWR6 | Nesprin-1                                                            | 805  | 14 | 143  | 737  | 0.5169 | -1.60 | 30  | 4.40   | 11.70 | 4.43   | 9.77   | 49  | 25.60  | 7.65   | 9.35   | 5.93   |
| P35980 | 60S ribosomal protein L18                                            | 245  | 3  | 162  | 240  | 0.1263 | -1.60 | 32  | 8.81   | 5.20  | 12.18  | 6.22   | 52  | 9.84   | 16.27  | 14.02  | 11.86  |
| Q9CR68 | Cytochrome b-c1 complex subunit Rieske, mitochondrial                | 893  | 11 | 629  | 128  | 0.0832 | -1.61 | 136 | 22.01  | 40.29 | 52.06  | 21.31  | 218 | 55.13  | 60.28  | 52.33  | 50.41  |
| Q80U9  | Membrane-associated progesterone receptor component 2                | 238  | 3  | 64   | 701  | 0.4636 | -1.61 | 16  | 2.20   | 3.90  | 6.65   | 3.55   | 26  | 11.81  | 5.74   | 2.80   | 5.93   |
| Q9CPU4 | Microsomal glutathione S-transferase 3                               | 243  | 3  | 208  | 698  | 0.4635 | -1.62 | 36  | 8.81   | 14.30 | 8.86   | 4.44   | 59  | 29.53  | 6.70   | 16.82  | 5.93   |
| Q8K3J1 | NADH dehydrogenase [ubiquinone] iron-sulfur protein 8, mitochondrial | 344  | 5  | 367  | 263  | 0.2628 | -1.62 | 61  | 15.41  | 10.40 | 23.26  | 12.43  | 100 | 15.75  | 36.36  | 18.69  | 28.91  |
| O35127 | Protein C10                                                          | 248  | 4  | 89   | 1150 | 0.7147 | -1.62 | 14  | 2.20   | 7.80  | 4.43   | 0.00   | 23  | 9.84   | 0.00   | 8.41   | 5.19   |
| Q9CQI3 | Glia maturation factor beta                                          | 283  | 3  | 246  | 284  | 0.1845 | -1.63 | 40  | 8.81   | 7.80  | 14.40  | 8.88   | 65  | 15.75  | 9.57   | 13.08  | 26.69  |
| P63024 | Vesicle-associated membrane protein 3                                | 297  | 4  | 144  | 1199 | 0.8262 | -1.63 | 26  | 4.40   | 7.80  | 13.29  | 0.89   | 43  | 17.72  | 0.00   | 18.69  | 6.67   |
| P62245 | 40S ribosomal protein S15a                                           | 430  | 7  | 209  | 1170 | 0.7731 | -1.64 | 28  | 2.20   | 13.00 | 12.18  | 0.89   | 46  | 11.81  | 0.00   | 19.63  | 14.83  |
| Q6R891 | Neurabin-2                                                           | 290  | 5  | 34   | 1511 | 0.8702 | -1.64 | 5   | 0.00   | 2.60  | 2.22   | 0.00   | 8   | 1.97   | 0.00   | 0.00   | 5.93   |
| P53994 | Ras-related protein Rab-2A                                           | 326  | 4  | 430  | 133  | 0.0653 | -1.65 | 91  | 33.02  | 14.30 | 23.26  | 20.42  | 150 | 53.16  | 37.32  | 25.23  | 34.10  |
| Q9D1X0 | Nucleolar protein 3                                                  | 312  | 5  | 67   | 1138 | 0.6997 | -1.65 | 12  | 2.20   | 1.30  | 8.86   | 0.00   | 20  | 5.91   | 11.48  | 0.00   | 2.97   |
| Q9D0J4 | ADP-ribosylation factor-like protein 2                               | 202  | 3  | 37   | 1270 | 0.3124 | -1.65 | 5   | 2.20   | 1.30  | 1.11   | 0.00   | 8   | 1.97   | 1.91   | 3.74   | 0.00   |
| Q9R1P3 | Proteasome subunit beta type-2                                       | 382  | 5  | 225  | 208  | 0.0973 | -1.65 | 31  | 8.81   | 3.90  | 12.18  | 6.22   | 51  | 11.81  | 11.48  | 21.49  | 6.67   |
| P0C0A3 | Charged multivesicular body protein 6                                | 147  | 2  | 8    | 1189 | 0.2272 | -1.66 | 2   | 2.20   | 0.00  | 0.00   | 0.00   | 4   | 1.97   | 0.00   | 0.93   | 0.74   |
| Q91ZZ3 | Beta-synuclein                                                       | 335  | 3  | 630  | 704  | 0.6407 | -1.66 | 101 | 24.22  | 29.89 | 35.44  | 11.54  | 167 | 49.22  | 6.70   | 58.88  | 52.63  |
| P62918 | 60S ribosomal protein L8                                             | 181  | 3  | 86   | 591  | 0.3481 | -1.66 | 15  | 2.20   | 1.30  | 4.43   | 7.10   | 25  | 5.91   | 9.57   | 2.80   | 6.67   |
| P63011 | Ras-related protein Rab-3A                                           | 620  | 9  | 1720 | 67   | 0.0518 | -1.67 | 318 | 72.65  | 63.68 | 68.67  | 112.77 | 529 | 161.45 | 139.70 | 102.80 | 125.28 |
| Q9WTX5 | S-phase kinase-associated protein 1                                  | 662  | 9  | 466  | 373  | 0.1905 | -1.67 | 80  | 8.81   | 18.19 | 36.55  | 16.87  | 134 | 43.32  | 33.49  | 29.90  | 27.43  |
| Q9Z2I0 | LETM1 and EF-hand domain-containing protein 1, mitochondrial         | 866  | 13 | 275  | 300  | 0.1018 | -1.67 | 51  | 4.40   | 16.89 | 8.86   | 20.42  | 84  | 13.78  | 28.71  | 23.36  | 18.53  |
| P63321 | Ras-related protein RaL-A                                            | 154  | 2  | 173  | 260  | 0.1655 | -1.67 | 31  | 4.40   | 6.50  | 13.29  | 7.10   | 52  | 15.75  | 11.48  | 10.28  | 14.83  |
| P24472 | Glutathione S-transferase A4                                         | 416  | 6  | 86   | 1070 | 0.6249 | -1.69 | 16  | 6.60   | 5.20  | 1.11   | 3.55   | 28  | 9.84   | 14.35  | 2.80   | 0.74   |
| P36536 | GTP-binding protein SAR1a                                            | 271  | 3  | 44   | 1102 | 0.6697 | -1.69 | 9   | 2.20   | 1.30  | 4.43   | 0.89   | 15  | 5.91   | 0.00   | 7.48   | 1.48   |
| P00405 | Cytochrome c oxidase subunit 2                                       | 795  | 10 | 1506 | 101  | 0.1311 | -1.69 | 273 | 48.43  | 55.88 | 101.90 | 66.60  | 460 | 86.63  | 112.91 | 84.11  | 176.43 |
| Q9WVLO | Maleylacetoacetate isomerase                                         | 410  | 6  | 117  | 552  | 0.3071 | -1.69 | 15  | 4.40   | 5.20  | 4.43   | 0.89   | 25  | 5.91   | 2.87   | 11.21  | 5.19   |
| Q9DC70 | NADH dehydrogenase [ubiquinone] iron-sulfur protein 7, mitochondrial | 517  | 7  | 344  | 103  | 0.0201 | -1.69 | 63  | 22.01  | 11.70 | 14.40  | 15.09  | 107 | 29.53  | 26.79  | 21.49  | 28.91  |
| Q9CR61 | NADH dehydrogenase [ubiquinone] 1 beta subcomplex subunit 7          | 920  | 14 | 548  | 783  | 0.7984 | -1.69 | 99  | 30.82  | 31.19 | 29.90  | 7.10   | 167 | 53.16  | 2.87   | 51.40  | 60.05  |
| Q8R1F5 | Putative hydroxypyruvate isomerase                                   | 170  | 3  | 47   | 1339 | 0.8456 | -1.69 | 7   | 2.20   | 0.00  | 0.00   | 4.44   | 11  | 0.00   | 9.57   | 0.93   | 0.74   |
| Q60932 | Voltage-dependent anion-selective channel protein 1                  | 1460 | 17 | 2894 | 70   | 0.0698 | -1.70 | 555 | 154.10 | 88.37 | 168.35 | 143.85 | 941 | 336.69 | 134.92 | 171.02 | 298.75 |
| P48774 | Glutathione S-transferase Mu 5                                       | 1110 | 17 | 515  | 83   | 0.0373 | -1.71 | 96  | 28.62  | 16.89 | 27.69  | 23.09  | 164 | 37.41  | 44.02  | 49.53  | 33.36  |
| Q9WUC3 | Lymphocyte antigen 6H                                                | 216  | 3  | 175  | 152  | 0.0147 | -1.71 | 33  | 13.21  | 5.20  | 6.65   | 7.99   | 57  | 23.63  | 8.61   | 14.02  | 10.38  |
| Q9D924 | Iron-sulfur cluster assembly 1 homolog, mitochondrial                | 229  | 4  | 27   | 1475 | 0.6798 | -1.71 | 4   | 0.00   | 2.60  | 1.11   | 0.00   | 6   | 3.94   | 0.00   | 0.93   | 1.48   |
| Q9CQJ8 | NADH dehydrogenase [ubiquinone] 1 beta subcomplex subunit 9          | 333  | 6  | 201  | 218  | 0.1432 | -1.72 | 31  | 4.40   | 7.80  | 11.08  | 7.99   | 54  | 11.81  | 17.22  | 8.41   | 16.31  |
| Q9DCX2 | ATP synthase subunit d, mitochondrial                                | 853  | 13 | 829  | 114  | 0.0900 | -1.72 | 153 | 39.63  | 19.49 | 55.38  | 38.18  | 263 | 63.01  | 68.89  | 59.81  | 71.17  |
| Q9D3D9 | ATP synthase subunit delta, mitochondrial                            | 303  | 4  | 183  | 378  | 0.1141 | -1.73 | 30  | 13.21  | 6.50  | 5.54   | 4.44   | 51  | 21.66  | 5.74   | 11.21  | 12.60  |
| Q9R1P1 | Proteasome subunit beta type-3                                       | 342  | 5  | 210  | 540  | 0.3085 | -1.73 | 34  | 11.01  | 6.50  | 9.97   | 6.22   | 58  | 19.69  | 23.92  | 9.35   | 5.19   |
| Q8BFR5 | Elongation factor Tu, mitochondrial                                  | 834  | 13 | 206  | 160  | 0.0300 | -1.73 | 44  | 13.21  | 6.50  | 15.51  | 8.88   | 76  | 27.57  | 15.31  | 21.49  | 11.86  |
| Q9Z1R2 | Large proline-rich protein BAT3                                      | 147  | 2  | 33   | 739  | 0.3228 | -1.73 | 5   | 0.00   | 0.00  | 4.43   | 0.89   | 9   | 3.94   | 1.91   | 1.87   | 1.48   |
| O55042 | Alpha-synuclein                                                      | 433  | 5  | 677  | 674  | 0.6364 | -1.74 | 103 | 39.63  | 24.69 | 29.90  | 8.88   | 179 | 51.19  | 5.74   | 51.40  | 71.17  |
| P61226 | Ras-related protein Rap-2b                                           | 485  | 7  | 196  | 395  | 0.1376 | -1.74 | 29  | 13.21  | 6.50  | 3.32   | 6.22   | 51  | 19.69  | 5.74   | 12.15  | 13.34  |
| P35803 | Neuronal membrane glycoprotein M6-b                                  | 245  | 4  | 155  | 1037 | 0.6122 | -1.75 | 40  | 2.20   | 18.19 | 9.97   | 9.77   | 70  | 39.38  | 11.48  | 3.74   | 15.57  |
| Q9D6S7 | Ribosome-recycling factor, mitochondrial                             | 337  | 5  | 45   | 884  | 0.4264 | -1.75 | 12  | 6.60   | 0.00  | 4.43   | 0.89   | 21  | 9.84   | 7.65   | 1.87   | 1.48   |
| Q8VHL1 | Histone-lysine N-methyltransferase SETD7                             | 167  | 2  | 10   | 1489 | 0.7684 | -1.75 | 2   | 0.00   | 1.30  | 0.00   | 0.89   | 4   | 1.97   | 0.00   | 1.87   | 0.00   |
| Q9CQ54 | NADH dehydrogenase [ubiquinone] 1 subunit C2                         | 462  | 7  | 173  | 885  | 0.7970 | -1.77 | 32  | 4.40   | 11.70 | 7.75   | 7.99   | 56  | 27.57  | 0.96   | 13.08  | 14.83  |
| Q9CQR4 | Acyl-coenzyme A thioesterase 13                                      | 594  | 9  | 327  | 808  | 0.6969 | -1.78 | 47  | 13.21  | 16.89 | 12.18  | 4.44   | 83  | 29.53  | 1.91   | 28.04  | 23.72  |
| Q8VE70 | Programmed cell death protein 10                                     | 226  | 4  | 77   | 447  | 0.1984 | -1.79 | 14  | 6.60   | 0.00  | 3.32   | 4.44   | 26  | 11.81  | 4.78   | 4.67   | 4.45   |
| Q9D6J6 | NADH dehydrogenase [ubiquinone] flavoprotein 2, mitochondrial        | 847  | 12 | 538  | 135  | 0.1030 | -1.79 | 107 | 22.01  | 20.79 | 44.30  | 19.53  | 191 | 49.22  | 58.37  | 37.38  | 45.96  |
| P97496 | SWI/SNF complex subunit SMARCC1                                      | 252  | 4  | 110  | 639  | 0.4442 | -1.79 | 25  | 2.20   | 11.70 | 4.43   | 6.22   | 44  | 21.66  | 6.70   | 11.21  | 4.45   |
| P23506 | Protein-L-isoaspartate(D-aspartate) O-methyltransferase              | 667  | 10 | 331  | 135  | 0.1039 | -1.80 | 56  | 19.81  | 5.20  | 17.72  | 13.32  | 101 | 19.69  | 20.09  | 40.18  | 20.76  |
| Q8BPN8 | DmX-like protein 2                                                   | 4121 | 64 | 1486 | 52   | 0.0491 | -1.80 | 218 | 44.03  | 59.78 | 38.76  | 75.47  | 392 | 120.11 | 86.12  | 92.52  | 93.40  |
| Q64010 | Adapter molecule crk                                                 | 262  | 4  | 74   | 889  | 0.4465 | -1.80 | 12  | 4.40   | 2.60  | 3.32   | 1.78   | 22  | 7.88   | 2.87   | 10.28  | 0.74   |
| P62281 | 40S ribosomal protein S11                                            | 188  | 3  | 130  | 436  | 0.1922 | -1.80 | 20  | 8.81   | 3.90  | 4.43   | 2.66   | 36  | 5.91   | 10.53  | 14.02  | 5.19   |
| P61021 | Ras-related protein Rab-5B                                           | 425  | 6  | 217  | 273  | 0.2258 | -1.80 | 36  | 13.21  | 2.60  | 11.08  | 8.88   | 65  | 11.81  | 20.09  | 21.49  | 11.12  |
| P97823 | Acyl-protein thioesterase 1                                          | 246  | 4  | 67   | 651  | 0      |       |     |        |       |        |        |     |        |        |        |        |

|        |                                                                   |      |    |      |      |        |       |     |       |       |       |       |     |        |        |        |        |
|--------|-------------------------------------------------------------------|------|----|------|------|--------|-------|-----|-------|-------|-------|-------|-----|--------|--------|--------|--------|
| Q3UV17 | Keratin, type II cytoskeletal 2 oral                              | 101  | 2  | 88   | 683  | 0.2437 | -1.96 | 14  | 0.00  | 3.90  | 2.22  | 7.99  | 28  | 7.88   | 2.87   | 6.54   | 10.38  |
| Q9DBJ1 | Phosphoglycerate mutase 1                                         | 935  | 13 | 981  | 64   | 0.0487 | -1.97 | 158 | 48.43 | 29.89 | 44.30 | 35.52 | 311 | 72.85  | 108.12 | 71.96  | 57.82  |
| Q92019 | WD repeat-containing protein 7                                    | 669  | 11 | 162  | 380  | 0.1754 | -1.97 | 17  | 4.40  | 6.50  | 1.11  | 5.33  | 34  | 3.94   | 14.35  | 8.41   | 7.41   |
| Q9ESN9 | C-Jun-amino-terminal kinase-interacting protein 3                 | 172  | 3  | 4    | 1375 | 0.3910 | -1.97 | 0   | 0.00  | 0.00  | 0.00  | 0.00  | 2   | 1.97   | 0.00   | 0.00   | 0.00   |
| P60469 | Liprin-alpha-3                                                    | 268  | 5  | 11   | 1375 | 0.3910 | -1.97 | 0   | 0.00  | 0.00  | 0.00  | 0.00  | 2   | 1.97   | 0.00   | 0.00   | 0.00   |
| P19258 | Protein Mpv17                                                     | 222  | 3  | 8    | 1375 | 0.3910 | -1.97 | 0   | 0.00  | 0.00  | 0.00  | 0.00  | 2   | 1.97   | 0.00   | 0.00   | 0.00   |
| P24529 | Tyrosine 3-monooxygenase                                          | 174  | 3  | 29   | 1375 | 0.3910 | -1.97 | 0   | 0.00  | 0.00  | 0.00  | 0.00  | 2   | 1.97   | 0.00   | 0.00   | 0.00   |
| P35293 | Ras-related protein Rab-18                                        | 553  | 8  | 259  | 253  | 0.0130 | -1.97 | 37  | 17.61 | 7.80  | 8.86  | 2.66  | 73  | 25.60  | 22.01  | 17.76  | 7.41   |
| O70251 | Elongation factor 1-beta                                          | 300  | 4  | 226  | 142  | 0.0631 | -1.98 | 30  | 6.60  | 7.80  | 5.54  | 9.77  | 59  | 7.88   | 20.09  | 16.82  | 14.08  |
| Q61171 | Peroxisomal protein 2                                             | 682  | 10 | 1050 | 22   | 0.0080 | -1.98 | 148 | 37.42 | 31.19 | 34.33 | 45.28 | 294 | 70.88  | 81.33  | 71.96  | 69.68  |
| Q9QXB9 | Developmentally-regulated GTP-binding protein 2                   | 142  | 2  | 8    | 1459 | 0.6440 | -1.98 | 2   | 0.00  | 1.30  | 1.11  | 0.00  | 5   | 1.97   | 0.00   | 2.80   | 0.00   |
| Q61035 | Histidyl-tRNA synthetase, cytoplasmic                             | 253  | 4  | 45   | 673  | 0.2431 | -1.99 | 9   | 4.40  | 2.60  | 0.00  | 1.78  | 17  | 7.88   | 1.91   | 4.67   | 2.97   |
| P70175 | Disks large homolog 3                                             | 314  | 5  | 56   | 924  | 0.5464 | -1.99 | 7   | 0.00  | 3.90  | 1.11  | 1.78  | 13  | 1.97   | 0.96   | 0.93   | 9.64   |
| P09671 | Superoxide dismutase [Mn], mitochondrial                          | 298  | 4  | 534  | 58   | 0.0473 | -1.99 | 74  | 19.81 | 14.30 | 19.94 | 19.53 | 147 | 23.63  | 45.93  | 35.51  | 41.51  |
| P84075 | Neuron-specific calcium-binding protein hippocalcin               | 292  | 4  | 204  | 130  | 0.0518 | -2.00 | 27  | 11.01 | 6.50  | 5.54  | 3.55  | 53  | 13.78  | 14.35  | 10.28  | 14.83  |
| Q60829 | Protein phosphatase 1 regulatory subunit 1B                       | 185  | 3  | 151  | 229  | 0.2252 | -2.00 | 23  | 0.00  | 6.50  | 14.40 | 1.78  | 45  | 13.78  | 5.74   | 14.02  | 11.86  |
| Q8R191 | Synaptogyrin-3                                                    | 178  | 3  | 112  | 487  | 0.0467 | -2.00 | 17  | 8.81  | 5.20  | 1.11  | 1.78  | 34  | 9.84   | 12.44  | 5.61   | 5.93   |
| Q9CQC6 | Basic leucine zipper and W2 domain-containing protein 1           | 200  | 4  | 5    | 1464 | 0.6642 | -2.01 | 1   | 0.00  | 1.30  | 0.00  | 0.00  | 3   | 0.00   | 0.00   | 1.87   | 0.74   |
| Q9CRB8 | Mitochondrial fission protein MTP18                               | 224  | 3  | 68   | 181  | 0.1578 | -2.01 | 14  | 2.20  | 3.90  | 4.43  | 3.55  | 28  | 11.81  | 6.70   | 4.67   | 5.19   |
| P01831 | Thy-1 membrane glycoprotein                                       | 415  | 6  | 803  | 38   | 0.0470 | -2.02 | 131 | 39.63 | 22.09 | 35.44 | 33.74 | 264 | 76.79  | 74.63  | 42.05  | 70.42  |
| P11087 | Collagen alpha-1(I) chain                                         | 268  | 4  | 27   | 1499 | 0.9668 | -2.02 | 3   | 2.20  | 0.00  | 1.11  | 0.00  | 7   | 0.00   | 0.00   | 0.00   | 6.67   |
| Q8R071 | Inositol-trisphosphate 3-kinase A                                 | 167  | 2  | 32   | 1244 | 0.3983 | -2.03 | 4   | 0.00  | 1.30  | 2.22  | 0.89  | 9   | 0.00   | 0.96   | 2.80   | 5.19   |
| Q91XV3 | Brain acid soluble protein 1                                      | 774  | 10 | 1337 | 11   | 0.0163 | -2.04 | 204 | 41.83 | 54.58 | 52.06 | 55.05 | 415 | 120.11 | 77.50  | 102.80 | 114.90 |
| Q63810 | Calcineurin subunit B type 1                                      | 843  | 12 | 743  | 65   | 0.0278 | -2.04 | 102 | 33.02 | 18.19 | 24.37 | 26.64 | 209 | 47.25  | 29.66  | 74.76  | 57.08  |
| Q9D394 | Protein RUFY3                                                     | 415  | 7  | 79   | 581  | 0.1586 | -2.06 | 13  | 2.20  | 7.80  | 2.22  | 0.89  | 27  | 1.97   | 9.57   | 10.28  | 5.19   |
| Q9Z0R4 | Intersectin-1                                                     | 222  | 4  | 35   | 1462 | 0.6779 | -2.07 | 3   | 0.00  | 0.00  | 2.22  | 0.89  | 6   | 1.97   | 0.00   | 0.00   | 4.45   |
| Q9CR95 | Adaptin ear-binding coat-associated protein 1                     | 295  | 4  | 224  | 226  | 0.2381 | -2.09 | 28  | 0.00  | 6.50  | 7.75  | 14.21 | 59  | 17.72  | 14.35  | 17.76  | 9.64   |
| P59999 | Actin-related protein 2/3 complex subunit 4                       | 316  | 5  | 301  | 139  | 0.0803 | -2.09 | 39  | 13.21 | 7.80  | 7.75  | 10.66 | 83  | 19.69  | 23.92  | 27.10  | 11.86  |
| Q9Z2Y3 | Homer protein homolog 1                                           | 362  | 6  | 27   | 1194 | 0.7378 | -2.10 | 6   | 2.20  | 3.90  | 0.00  | 0.00  | 13  | 9.84   | 0.00   | 0.00   | 2.97   |
| Q9WU28 | Prefoldin subunit 5                                               | 430  | 6  | 87   | 567  | 0.1564 | -2.10 | 8   | 2.20  | 2.60  | 3.32  | 0.00  | 17  | 7.88   | 1.91   | 6.54   | 0.74   |
| Q9CQQ7 | ATP synthase subunit b, mitochondrial                             | 715  | 11 | 422  | 55   | 0.0166 | -2.12 | 70  | 24.22 | 14.30 | 13.29 | 18.65 | 149 | 43.32  | 40.19  | 37.38  | 28.17  |
| Q8BRT1 | CLIP-associating protein 2                                        | 270  | 4  | 32   | 547  | 0.1374 | -2.12 | 8   | 4.40  | 1.30  | 0.00  | 2.66  | 18  | 9.84   | 2.87   | 2.80   | 2.22   |
| O35526 | Syntaxin-1A                                                       | 1142 | 16 | 641  | 42   | 0.0001 | -2.13 | 96  | 33.02 | 18.19 | 18.83 | 25.75 | 204 | 70.88  | 42.10  | 38.32  | 52.63  |
| Q9WV18 | Gamma-aminobutyric acid type B receptor subunit 1                 | 195  | 3  | 57   | 944  | 0.6151 | -2.14 | 15  | 8.81  | 6.50  | 0.00  | 0.00  | 33  | 3.94   | 0.00   | 10.28  | 18.53  |
| P62996 | Transformer-2 protein homolog beta                                | 121  | 2  | 14   | 1459 | 0.7007 | -2.16 | 4   | 2.20  | 1.30  | 0.00  | 0.00  | 8   | 1.97   | 0.00   | 5.61   | 0.00   |
| Q9DCV4 | Regulator of microtubule dynamics protein 1                       | 122  | 2  | 13   | 1367 | 0.4232 | -2.17 | 2   | 2.20  | 0.00  | 0.00  | 0.00  | 5   | 1.97   | 0.00   | 2.80   | 0.00   |
| Q92AM7 | Mannose-6-phosphate isomerase                                     | 213  | 3  | 21   | 1447 | 0.6331 | -2.18 | 3   | 0.00  | 0.00  | 0.00  | 2.66  | 6   | 3.94   | 0.00   | 1.87   | 0.00   |
| Q9CQ69 | Cytochrome b-c1 complex subunit 8                                 | 130  | 2  | 49   | 455  | 0.6254 | -2.19 | 12  | 2.20  | 2.60  | 3.32  | 3.55  | 26  | 11.81  | 0.00   | 5.61   | 8.15   |
| Q8BKX1 | Brain-specific angiogenesis inhibitor 1-associated protein 2      | 464  | 7  | 69   | 205  | 0.0071 | -2.21 | 7   | 4.40  | 1.30  | 1.11  | 0.00  | 15  | 7.88   | 2.87   | 2.80   | 1.48   |
| O08989 | Ras-related protein M-Ras                                         | 185  | 3  | 12   | 1208 | 0.1951 | -2.21 | 2   | 2.20  | 0.00  | 0.00  | 0.00  | 5   | 3.94   | 0.00   | 0.93   | 0.00   |
| Q8BHZ0 | Protein FAM49A                                                    | 230  | 4  | 11   | 1434 | 0.5998 | -2.22 | 4   | 2.20  | 1.30  | 0.00  | 0.00  | 8   | 5.91   | 0.00   | 1.87   | 0.00   |
| Q5M8N0 | CB1 cannabinoid receptor-interacting protein 1                    | 285  | 4  | 344  | 116  | 0.0594 | -2.22 | 47  | 4.40  | 5.20  | 26.58 | 10.66 | 104 | 27.57  | 19.14  | 29.90  | 27.43  |
| Q9CPS6 | Histidine triad nucleotide-binding protein 3                      | 158  | 3  | 13   | 1206 | 0.1961 | -2.22 | 2   | 2.20  | 0.00  | 0.00  | 0.00  | 5   | 3.94   | 0.96   | 0.00   | 0.00   |
| Q91ZU6 | Bullous pemphigoid antigen 1                                      | 1301 | 22 | 127  | 708  | 0.3433 | -2.23 | 26  | 4.40  | 13.00 | 1.11  | 7.10  | 57  | 27.57  | 4.78   | 15.89  | 8.90   |
| Q8CGF6 | WD repeat-containing protein 47                                   | 128  | 2  | 10   | 1388 | 0.4800 | -2.25 | 1   | 0.00  | 1.30  | 0.00  | 0.00  | 3   | 1.97   | 0.96   | 0.00   | 0.00   |
| Q9CRC9 | Glucosamine-6-phosphate isomerase 2                               | 244  | 4  | 33   | 898  | 0.5708 | -2.26 | 6   | 2.20  | 0.00  | 1.11  | 2.66  | 14  | 5.91   | 5.74   | 1.87   | 0.00   |
| Q9D6G9 | CKLF-like MARVEL transmembrane domain-containing protein 5        | 202  | 3  | 24   | 717  | 0.7045 | -2.26 | 8   | 0.00  | 2.60  | 3.32  | 1.78  | 17  | 11.81  | 1.91   | 0.00   | 3.71   |
| Q9CZT8 | Ras-related protein Rab-3B                                        | 434  | 6  | 490  | 21   | 0.0093 | -2.28 | 75  | 22.01 | 19.49 | 18.83 | 14.21 | 170 | 47.25  | 38.27  | 35.51  | 48.93  |
| P45878 | Peptidyl-prolyl cis-trans isomerase FKBP2                         | 322  | 5  | 106  | 720  | 0.7204 | -2.28 | 13  | 2.20  | 6.50  | 3.32  | 0.89  | 29  | 3.94   | 0.00   | 19.63  | 5.93   |
| P04104 | Keratin, type II cytoskeletal 1                                   | 153  | 2  | 163  | 656  | 0.2812 | -2.29 | 23  | 2.20  | 11.70 | 8.86  | 0.00  | 52  | 17.72  | 7.65   | 7.48   | 19.27  |
| Q3TTY5 | Keratin, type II cytoskeletal 2 epidermal                         | 142  | 2  | 39   | 814  | 0.4885 | -2.29 | 6   | 0.00  | 1.30  | 3.32  | 1.78  | 15  | 5.91   | 0.00   | 6.54   | 2.22   |
| Q9CQI6 | Coactosin-like protein                                            | 215  | 3  | 150  | 900  | 0.5990 | -2.30 | 12  | 2.20  | 9.10  | 1.11  | 0.00  | 28  | 3.94   | 0.00   | 11.21  | 13.34  |
| O35969 | Guanidinoacetate N-methyltransferase                              | 219  | 3  | 50   | 1203 | 0.4107 | -2.32 | 4   | 0.00  | 0.00  | 2.22  | 1.78  | 9   | 0.00   | 3.83   | 4.67   | 0.74   |
| Q7TPM6 | Fibronectin type III and SPRY domain-containing protein 1         | 217  | 3  | 27   | 1233 | 0.2377 | -2.33 | 4   | 0.00  | 2.60  | 1.11  | 0.00  | 9   | 1.97   | 5.74   | 0.93   | 0.00   |
| P18760 | Cofilin-1                                                         | 716  | 10 | 1123 | 12   | 0.0026 | -2.33 | 141 | 33.02 | 32.49 | 42.09 | 33.74 | 330 | 90.57  | 58.37  | 99.99  | 80.80  |
| P49615 | Cell division protein kinase 5                                    | 374  | 6  | 99   | 100  | 0.0386 | -2.35 | 11  | 2.20  | 3.90  | 2.22  | 2.66  | 26  | 7.88   | 6.70   | 7.48   | 3.71   |
| P68404 | Protein kinase C beta type                                        | 458  | 7  | 157  | 472  | 0.0841 | -2.37 | 18  | 2.20  | 9.10  | 0.00  | 7.10  | 44  | 11.81  | 8.61   | 4.67   | 18.53  |
| Q61016 | Guanine nucleotide-binding protein G(I)/G(S)/G(O) subunit gamma-7 | 170  | 3  | 52   | 1136 | 0.9392 | -2.38 | 14  | 2.20  | 6.50  | 5.54  | 0.00  | 34  | 7.88   | 0.00   | 0.00   | 25.95  |
| Q3UHJ0 | AP2-associated protein kinase 1                                   | 665  | 10 | 147  | 384  | 0.2516 | -2.38 | 20  | 2.20  | 6.50  | 9.97  | 1.78  | 49  | 17.72  | 6.70   | 6.54   | 17.79  |
| P60824 | Cold-inducible RNA-binding protein                                | 277  | 4  | 89   | 89   | 0.0199 | -2.40 | 11  | 2.20  | 2.60  | 4.43  | 1.78  | 26  | 7.88   | 3.83   | 10.28  | 4.45   |
| P02535 | Keratin, type I cytoskeletal 10                                   | 240  | 3  | 128  | 313  | 0.1705 | -2.40 | 24  | 6.60  | 9.10  | 5.54  | 2.66  | 57  | 23.63  | 6.70   | 9.35   | 17.79  |
| P60904 | DnaJ homolog subfamily C member 5                                 | 187  | 3  | 252  | 91   | 0.0245 | -2.42 | 41  | 11.01 | 5.20  | 16.61 | 7.99  | 99  | 33.47  | 22.96  | 25.23  | 17.05  |
| Q64436 | Potassium-transporting ATPase alpha chain 1                       | 241  | 4  | 95   | 623  | 0.5557 | -2.42 | 29  | 8.81  | 14.30 | 4.43  | 1.78  | 71  | 57.10  | 4.78   | 4.67   | 4.45   |
| Q9Z2I2 | Peptidyl-prolyl cis-trans isomerase FKBP1B                        | 132  | 2  | 11   | 1304 | 0.5557 | -2.43 | 3   | 0.00  | 1.30  | 0.00  | 1.78  | 7   | 3.94   | 0.00   | 2.80   | 0.74   |
| Q91VW3 | SH3 domain-binding glutamic acid-rich-like protein 3              | 258  | 4  | 90   | 655  | 0.6349 | -2.44 | 19  | 4.40  | 5.20  | 7.75  | 1.78  | 47  | 15.75  | 0.00   | 13.08  | 17.79  |
| Q9CQA1 | Trafficking protein particle complex subunit 5                    | 186  | 3  | 23   | 876  | 0.5690 | -2.45 | 4   | 2.20  | 1.30  | 0.00  | 0.89  | 11  | 7.88   | 2.87   | 0.00   | 0.00   |
| Q9Z268 | RasGAP-activating-like protein 1                                  | 404  | 7  | 66   | 215  | 0.0356 | -2.47 | 10  | 2.20  | 3.90  | 0.00  | 3.55  | 24  | 3.94   | 6.70   | 2.80   | 10.38  |
| Q9CQX8 | 28S ribosomal protein S36, mitochondrial                          | 214  | 3  | 53   | 1014 | 0.5194 | -2.47 | 8   | 0.00  | 1.30  | 6.65  | 0.00  | 20  | 11.81  | 0.00   | 1.87   | 5.93   |
| Q9DB27 | Malignant T cell-amplified sequence 1                             | 151  | 2  | 16   | 1423 | 0.5968 | -2.47 | 4   | 0.00  | 3.90  | 0.00  | 0.00  | 10  | 5.91   | 0.00   | 3.74   | 0.00   |
| Q9R0P5 | Dextrin                                                           | 579  | 8  | 437  | 41   | 0.0211 | -2.48 | 50  | 11.01 | 11.70 | 14.40 | 13.32 | 125 | 15.75  | 37.32  | 43.92  | 28.17  |
| O55100 | Synaptogyrin-1                                                    | 130  | 2  | 70   | 451  | 0.0733 | -2.49 | 11  | 6.60  | 3.90  | 0.00  | 0.89  | 28  | 15.75  | 3.83   | 2.80   | 5.93   |
| Q8BH55 | Threonine synthase-like 1                                         | 214  | 3  | 25   | 1444 | 0.6673 | -2.51 | 3   | 0.00  | 0.00  | 0.00  | 2.66  | 7   | 0.00   | 5.74   | 0.93   | 0.00   |
| P42859 | Huntingtin                                                        | 700  | 11 | 53   | 824  | 0.3186 | -2.54 | 4   | 2.20  | 0.00  | 0.00  | 1.78  | 10  | 7.88   | 0.00   | 0.00   | 2.22   |
| P97461 | 40S ribosomal protein S5                                          | 170  | 3  | 47   | 531  | 0.4619 | -2.55 | 5   | 2.20  | 0.00  | 0.00  | 2.66  | 12  | 0.00   | 3.83   | 5.61   | 2.97   |
| Q9QY   |                                                                   |      |    |      |      |        |       |     |       |       |       |       |     |        |        |        |        |

|        |                                                                 |      |    |     |      |        |        |    |       |       |       |       |     |        |       |       |       |
|--------|-----------------------------------------------------------------|------|----|-----|------|--------|--------|----|-------|-------|-------|-------|-----|--------|-------|-------|-------|
| P47934 | Carnitine O-acetyltransferase                                   | 122  | 2  | 23  | 819  | 0.0693 | -3.05  | 2  | 0.00  | 1.30  | 1.11  | 0.00  | 7   | 0.00   | 2.87  | 3.74  | 0.74  |
| Q3UX10 | Tubulin alpha chain-like 3                                      | 186  | 3  | 44  | 538  | 0.2053 | -3.06  | 6  | 2.20  | 2.60  | 1.11  | 0.00  | 18  | 1.97   | 9.57  | 6.54  | 0.00  |
| Q9QZ23 | NFU1 iron-sulfur cluster scaffold homolog, mitochondrial        | 200  | 3  | 71  | 74   | 0.0897 | -3.13  | 6  | 4.40  | 0.00  | 0.00  | 1.78  | 19  | 3.94   | 4.78  | 4.67  | 5.93  |
| Q8BGZ1 | Hippocalcin-like protein 4                                      | 779  | 11 | 324 | 27   | 0.0000 | -3.15  | 33 | 11.01 | 7.80  | 7.75  | 6.22  | 103 | 31.50  | 24.88 | 25.23 | 21.50 |
| Q9D8W7 | OClA domain-containing protein 2                                | 301  | 3  | 36  | 801  | 0.3582 | -3.17  | 7  | 4.40  | 2.60  | 0.00  | 0.00  | 22  | 13.78  | 0.00  | 4.67  | 3.71  |
| P12367 | cAMP-dependent protein kinase type II-alpha regulatory subunit  | 233  | 4  | 70  | 415  | 0.0798 | -3.18  | 9  | 0.00  | 2.60  | 4.43  | 1.78  | 28  | 5.91   | 9.57  | 10.28 | 2.22  |
| Q9DD18 | D-tyrosyl-tRNA(Tyr) deacylase 1                                 | 161  | 2  | 74  | 211  | 0.0806 | -3.19  | 9  | 4.40  | 1.30  | 2.22  | 0.89  | 28  | 3.94   | 10.53 | 8.41  | 5.19  |
| Q8QZ24 | Neuronal growth regulator 1                                     | 251  | 4  | 80  | 243  | 0.1263 | -3.19  | 11 | 4.40  | 2.60  | 0.00  | 3.55  | 34  | 9.84   | 13.40 | 7.48  | 2.97  |
| P70333 | Heterogeneous nuclear ribonucleoprotein H2                      | 267  | 4  | 41  | 799  | 0.5532 | -3.21  | 6  | 2.20  | 0.00  | 1.11  | 2.66  | 19  | 9.84   | 8.61  | 0.00  | 0.74  |
| O08917 | Flotillin-1                                                     | 610  | 9  | 50  | 200  | 0.0672 | -3.29  | 10 | 4.40  | 2.60  | 0.00  | 2.66  | 32  | 7.88   | 9.57  | 8.41  | 5.93  |
| A2AG50 | MAP7 domain-containing protein 2                                | 220  | 4  | 100 | 68   | 0.0856 | -3.36  | 12 | 0.00  | 5.20  | 6.65  | 0.00  | 40  | 11.81  | 10.53 | 9.35  | 8.15  |
| Q64520 | Guanylate kinase                                                | 350  | 5  | 78  | 415  | 0.0888 | -3.38  | 4  | 2.20  | 0.00  | 1.11  | 0.89  | 14  | 1.97   | 3.83  | 4.67  | 3.71  |
| P60766 | Cell division control protein 42 homolog                        | 472  | 7  | 461 | 22   | 0.0004 | -3.45  | 46 | 8.81  | 10.40 | 14.40 | 12.43 | 159 | 29.53  | 44.02 | 47.66 | 37.81 |
| Q8BW96 | Calcium/calmodulin-dependent protein kinase type 1D             | 179  | 3  | 16  | 1391 | 0.6095 | -3.46  | 2  | 0.00  | 1.30  | 0.00  | 0.89  | 8   | 1.97   | 0.00  | 5.61  | 0.00  |
| Q91VC7 | Protein phosphatase 1 regulatory subunit 14A                    | 206  | 3  | 29  | 1118 | 0.1882 | -3.52  | 1  | 0.00  | 1.30  | 0.00  | 0.00  | 5   | 0.00   | 3.83  | 0.00  | 0.74  |
| Q9QYX7 | Protein piccolo                                                 | 730  | 12 | 68  | 1062 | 0.6823 | -3.53  | 14 | 0.00  | 7.80  | 5.54  | 0.89  | 50  | 39.38  | 0.00  | 1.87  | 8.90  |
| Q9QYA2 | Mitochondrial import receptor subunit TOM40 homolog             | 224  | 3  | 16  | 1301 | 0.4418 | -3.53  | 3  | 0.00  | 2.60  | 0.00  | 0.00  | 9   | 0.00   | 0.96  | 7.48  | 0.74  |
| P08122 | Collagen alpha-2(IV) chain                                      | 243  | 4  | 36  | 344  | 0.0401 | -3.63  | 5  | 2.20  | 0.00  | 2.22  | 0.89  | 19  | 7.88   | 1.91  | 2.80  | 6.67  |
| O09111 | NADH dehydrogenase [ubiquinone] 1 beta subcomplex subunit 11, n | 309  | 5  | 31  | 866  | 0.4490 | -3.66  | 5  | 0.00  | 5.20  | 0.00  | 0.00  | 19  | 13.78  | 0.00  | 3.74  | 1.48  |
| O35685 | Nuclear migration protein nudC                                  | 196  | 3  | 24  | 705  | 0.2350 | -3.69  | 1  | 0.00  | 1.30  | 0.00  | 0.00  | 5   | 1.97   | 0.96  | 1.87  | 0.00  |
| Q922Q4 | Pyroline-5-carboxylate reductase 2                              | 111  | 2  | 11  | 1353 | 0.5384 | -3.75  | 1  | 0.00  | 1.30  | 0.00  | 0.00  | 5   | 3.94   | 0.00  | 0.93  | 0.00  |
| P63143 | Voltage-gated potassium channel subunit beta-1                  | 201  | 3  | 15  | 1353 | 0.5384 | -3.75  | 1  | 0.00  | 1.30  | 0.00  | 0.00  | 5   | 3.94   | 0.00  | 0.93  | 0.00  |
| Q99KR7 | Peptidyl-prolyl cis-trans isomerase F, mitochondrial            | 258  | 4  | 90  | 314  | 0.0105 | -3.87  | 5  | 2.20  | 1.30  | 1.11  | 0.00  | 18  | 5.91   | 7.65  | 2.80  | 1.48  |
| Q8BFY6 | Peflin                                                          | 309  | 4  | 59  | 847  | 0.4384 | -3.89  | 6  | 4.40  | 0.00  | 1.11  | 0.89  | 25  | 3.94   | 18.18 | 2.80  | 0.00  |
| Q9DCS2 | UPF0585 protein C16orf13 homolog                                | 188  | 3  | 50  | 712  | 0.4747 | -3.93  | 5  | 2.20  | 0.00  | 2.22  | 0.89  | 21  | 0.00   | 14.35 | 2.80  | 3.71  |
| P62823 | Ras-related protein Rab-3C                                      | 430  | 7  | 184 | 332  | 0.0346 | -3.93  | 19 | 13.21 | 3.90  | 2.22  | 0.00  | 76  | 45.29  | 6.70  | 15.89 | 8.15  |
| Q8VCE6 | 5(3)-deoxyribonucleotidase, mitochondrial                       | 127  | 2  | 3   | 1254 | 0.3910 | -3.94  | 0  | 0.00  | 0.00  | 0.00  | 0.00  | 4   | 3.94   | 0.00  | 0.00  | 0.00  |
| P43024 | Cytochrome c oxidase subunit 6A1, mitochondrial                 | 142  | 2  | 2   | 1254 | 0.3910 | -3.94  | 0  | 0.00  | 0.00  | 0.00  | 0.00  | 4   | 3.94   | 0.00  | 0.00  | 0.00  |
| Q9DBZ5 | Eukaryotic translation initiation factor 3 subunit K            | 263  | 4  | 24  | 1254 | 0.3910 | -3.94  | 0  | 0.00  | 0.00  | 0.00  | 0.00  | 4   | 3.94   | 0.00  | 0.00  | 0.00  |
| Q9DAM7 | UPF0444 transmembrane protein C12orf23 homolog                  | 127  | 2  | 10  | 1254 | 0.3910 | -3.94  | 0  | 0.00  | 0.00  | 0.00  | 0.00  | 4   | 3.94   | 0.00  | 0.00  | 0.00  |
| P63242 | Eukaryotic translation initiation factor 5A-1                   | 185  | 2  | 106 | 469  | 0.0160 | -4.06  | 9  | 0.00  | 2.60  | 5.54  | 0.89  | 37  | 1.97   | 4.78  | 26.17 | 3.71  |
| Q8CC35 | Synaptopodin                                                    | 490  | 8  | 76  | 792  | 0.6072 | -4.13  | 9  | 0.00  | 5.20  | 3.32  | 0.89  | 39  | 21.66  | 0.00  | 0.93  | 16.31 |
| Q0VBF8 | Uncharacterized membrane protein C1orf95 homolog                | 145  | 2  | 81  | 356  | 0.3526 | -4.28  | 7  | 2.20  | 2.60  | 0.00  | 1.78  | 28  | 7.88   | 0.00  | 12.15 | 8.15  |
| P23818 | Glutamate receptor 1                                            | 132  | 2  | 6   | 1081 | 0.1850 | -4.77  | 0  | 0.00  | 0.00  | 0.00  | 0.00  | 5   | 1.97   | 0.00  | 2.80  | 0.00  |
| Q9DB60 | Uncharacterized protein C1orf93 homolog                         | 194  | 3  | 53  | 69   | 0.0801 | -4.82  | 3  | 2.20  | 0.00  | 0.00  | 0.89  | 15  | 3.94   | 4.78  | 4.67  | 1.48  |
| O88737 | Protein bassoon                                                 | 2153 | 35 | 408 | 511  | 0.2321 | -5.93  | 44 | 0.00  | 7.80  | 27.69 | 8.88  | 263 | 165.39 | 16.27 | 16.82 | 64.49 |
| Q60634 | Flotillin-2                                                     | 327  | 5  | 20  | 61   | 0.0752 | -6.25  | 2  | 0.00  | 0.00  | 0.00  | 1.78  | 11  | 3.94   | 2.87  | 2.80  | 1.48  |
| Q01097 | Glutamate [NMDA] receptor subunit epsilon-2                     | 206  | 3  | 11  | 1053 | 0.1834 | -6.90  | 0  | 0.00  | 0.00  | 0.00  | 0.00  | 7   | 3.94   | 0.00  | 0.00  | 2.97  |
| B0V2N1 | Receptor-type tyrosine-protein phosphatase S                    | 226  | 4  | 21  | 1118 | 0.2517 | -6.94  | 1  | 0.00  | 0.00  | 0.00  | 0.89  | 6   | 3.94   | 0.00  | 0.00  | 2.22  |
| Q7TMY8 | E3 ubiquitin-protein ligase HUWE1                               | 485  | 8  | 61  | 1356 | 0.6098 | -7.11  | 1  | 0.00  | 0.00  | 1.11  | 0.00  | 8   | 7.88   | 0.00  | 0.00  | 0.00  |
| Q6PCP5 | Mitochondrial fission factor                                    | 183  | 3  | 14  | 1356 | 0.6098 | -7.11  | 1  | 0.00  | 0.00  | 1.11  | 0.00  | 8   | 7.88   | 0.00  | 0.00  | 0.00  |
| Q9D6K8 | FUN14 domain-containing protein 2                               | 171  | 3  | 19  | 1179 | 0.3608 | -7.59  | 1  | 0.00  | 0.00  | 0.00  | 0.89  | 7   | 3.94   | 0.00  | 2.80  | 0.00  |
| Q9D0R8 | Protein LSM12 homolog                                           | 188  | 3  | 23  | 926  | 0.2525 | -7.62  | 1  | 0.00  | 0.00  | 0.00  | 0.89  | 7   | 3.94   | 0.96  | 1.87  | 0.00  |
| Q9D2F7 | Nuclear pore membrane glycoprotein 210-like                     | 148  | 3  | 13  | 967  | 0.1157 | -8.32  | 0  | 0.00  | 0.00  | 0.00  | 0.00  | 8   | 1.97   | 0.00  | 5.61  | 0.74  |
| Q9QYS2 | Metabotropic glutamate receptor 3                               | 181  | 3  | 39  | 467  | 0.2272 | -8.38  | 1  | 0.00  | 1.30  | 0.00  | 0.00  | 11  | 1.97   | 0.00  | 3.74  | 5.19  |
| Q5H8C4 | Vacuolar protein sorting-associated protein 13A                 | 199  | 3  | 19  | 425  | 0.0100 | -9.01  | 0  | 0.00  | 0.00  | 0.00  | 0.00  | 9   | 3.94   | 1.91  | 0.93  | 2.22  |
| P70195 | Proteasome subunit beta type-7                                  | 304  | 5  | 59  | 185  | 0.1274 | -9.22  | 3  | 0.00  | 2.60  | 0.00  | 0.00  | 24  | 9.84   | 4.78  | 9.35  | 0.00  |
| Q8R570 | Synaptosomal-associated protein 47                              | 274  | 5  | 20  | 694  | 0.3215 | -9.44  | 1  | 0.00  | 1.30  | 0.00  | 0.00  | 12  | 9.84   | 0.00  | 0.93  | 1.48  |
| Q8R404 | Protein QLI1                                                    | 150  | 2  | 28  | 689  | 0.3170 | -9.62  | 2  | 0.00  | 0.00  | 1.11  | 0.89  | 19  | 9.84   | 0.00  | 9.35  | 0.00  |
| P56565 | Protein S100-A1                                                 | 172  | 3  | 16  | 825  | 0.4863 | -9.92  | 1  | 0.00  | 1.30  | 0.00  | 0.00  | 13  | 0.00   | 0.00  | 12.15 | 0.74  |
| Q8CGA0 | Protein phosphatase 1F                                          | 174  | 3  | 19  | 320  | 0.0758 | -10.00 | 0  | 0.00  | 0.00  | 0.00  | 0.00  | 10  | 0.00   | 4.78  | 3.74  | 1.48  |
| P56371 | Ras-related protein Rab-4A                                      | 179  | 3  | 17  | 337  | 0.0980 | -10.67 | 0  | 0.00  | 0.00  | 0.00  | 0.00  | 11  | 5.91   | 3.83  | 0.93  | 0.00  |
| Q9R0Q3 | Transmembrane emp24 domain-containing protein 2                 | 283  | 4  | 31  | 515  | 0.1212 | -14.02 | 0  | 0.00  | 0.00  | 0.00  | 0.00  | 14  | 3.94   | 0.00  | 9.35  | 0.74  |
| P61211 | ADP-ribosylation factor-like protein 1                          | 242  | 4  | 39  | 10   | 0.0023 | -14.58 | 1  | 0.00  | 0.00  | 1.11  | 0.00  | 16  | 3.94   | 3.83  | 4.67  | 3.71  |
| Q4ACU6 | SH3 and multiple ankyrin repeat domains protein 3               | 269  | 5  | 16  | 519  | 0.1264 | -15.71 | 0  | 0.00  | 0.00  | 0.00  | 0.00  | 16  | 11.81  | 0.00  | 0.93  | 2.97  |
| Q9JH15 | Isovaleryl-CoA dehydrogenase, mitochondrial                     | 516  | 9  | 47  | 342  | 0.1147 | -17.10 | 1  | 0.00  | 0.00  | 0.00  | 0.89  | 15  | 7.88   | 0.96  | 5.61  | 0.74  |

| ID <sup>a</sup> | Protein                                              | Total Score <sup>b</sup> | Total Unique Peptides <sup>c</sup> | Total SpC <sup>d</sup> | Non-amyloid (C57BL/10) Rank | Non-amyloid p-value | Non-amyloid Δ-fold | C57-Sc total SpC | C57-Sc mouse1 SpC | C57-Sc mouse2 SpC | C57-Sc mouse3 SpC | C57-Sc mouse4 SpC | C57-U total SpC <sup>e</sup> | C57-U mouse1 SpC | C57-U mouse2 SpC | C57-U mouse3 SpC | C57-U mouse4 SpC |
|-----------------|------------------------------------------------------|--------------------------|------------------------------------|------------------------|-----------------------------|---------------------|--------------------|------------------|-------------------|-------------------|-------------------|-------------------|------------------------------|------------------|------------------|------------------|------------------|
| P04925          | Major prion protein                                  | 1053                     | 12                                 | 1569                   | 86                          | 0.0869              | 1.99               | 175              | 49.02             | 47.68             | 49.64             | 29.10             | 88                           | 11.47            | 18.22            | 32.09            | 26.24            |
| Q8VCM7          | Fibrinogen gamma chain                               | 405                      | 7                                  | 84                     | 8                           | 0.0009              | 27.87              | 28               | 4.26              | 9.54              | 5.99              | 8.08              | 0                            | 0.00             | 0.00             | 0.00             | 0.00             |
| P51910          | Apolipoprotein D                                     | 250                      | 4                                  | 59                     | 334                         | 0.0769              | 15.78              | 16               | 8.53              | 2.12              | 5.14              | 0.00              | 0                            | 0.00             | 0.00             | 0.00             | 0.00             |
| O35639          | Annexin A3                                           | 461                      | 8                                  | 58                     | 1431                        | 0.6455              | -1.16              | 6                | 0.00              | 4.24              | 1.71              | 0.00              | 7                            | 3.06             | 1.66             | 2.19             | 0.00             |
| P07356          | Annexin A2                                           | 540                      | 8                                  | 51                     | 987                         | 0.5684              | 3.36               | 11               | 0.00              | 8.48              | 2.57              | 0.00              | 3                            | 0.00             | 0.83             | 0.00             | 2.46             |
| Q8K0E8          | Fibrinogen beta chain                                | 408                      | 7                                  | 29                     | 1261                        | 0.3910              | 3.42               | 3                | 0.00              | 0.00              | 3.42              | 0.00              | 0                            | 0.00             | 0.00             | 0.00             | 0.00             |
| P13634          | Carbonic anhydrase 1                                 | 279                      | 4                                  | 49                     | 14                          | 0.0065              | 8.15               | 32               | 8.53              | 5.30              | 11.98             | 6.47              | 4                            | 0.76             | 0.83             | 0.73             | 1.64             |
| Q07797          | Galectin-3-binding protein                           | 341                      | 5                                  | 22                     | 1552                        | ?                   | 0.00               | 0                | 0.00              | 0.00              | 0.00              | 0.00              | 0                            | 0.00             | 0.00             | 0.00             | 0.00             |
| Q91X72          | Hemopexin                                            | 501                      | 8                                  | 94                     | 409                         | 0.0888              | 3.96               | 24               | 5.33              | 7.42              | 11.13             | 0.00              | 6                            | 0.00             | 1.66             | 4.38             | 0.00             |
| Q61233          | Plastin-2                                            | 382                      | 7                                  | 19                     | 1389                        | 0.7053              | 2.91               | 2                | 0.00              | 2.12              | 0.00              | 0.00              | 1                            | 0.00             | 0.00             | 0.73             | 0.00             |
| Q61646          | Haptoglobin                                          | 287                      | 4                                  | 16                     | 1553                        | ?                   | 0.00               | 0                | 0.00              | 0.00              | 0.00              | 0.00              | 0                            | 0.00             | 0.00             | 0.00             | 0.00             |
| Q02105          | Complement C1q subcomponent subunit C                | 168                      | 3                                  | 49                     | 87                          | 0.0074              | 27.62              | 20               | 4.26              | 7.42              | 6.85              | 1.62              | 1                            | 0.00             | 0.00             | 0.73             | 0.00             |
| P08032          | Spectrin alpha chain, erythrocyte                    | 527                      | 9                                  | 36                     | 614                         | 0.1952              | 14.06              | 22               | 9.59              | 1.06              | 11.13             | 0.00              | 2                            | 0.00             | 0.00             | 0.73             | 0.82             |
| P01029          | Complement C4-B                                      | 223                      | 4                                  | 17                     | 1333                        | 0.3910              | 2.12               | 2                | 0.00              | 2.12              | 0.00              | 0.00              | 0                            | 0.00             | 0.00             | 0.00             | 0.00             |
| Q8R1B4          | Eukaryotic translation initiation factor 3 subunit C | 223                      | 3                                  | 33                     | 820                         | 0.7075              | 2.10               | 11               | 5.33              | 0.00              | 5.99              | 0.00              | 5                            | 2.29             | 0.00             | 1.46             | 1.64             |
| P09055          | Integrin beta-1                                      | 179                      | 3                                  | 18                     | 235                         | 0.0088              | 7.78               | 8                | 2.13              | 3.18              | 0.86              | 1.62              | 0                            | 0.00             | 0.00             | 0.00             | 0.00             |
| Q91V17          | Ribonuclease inhibitor                               | 314                      | 5                                  | 13                     | 1186                        | 0.2060              | -2.39              | 0                | 0.00              | 0.00              | 0.00              | 0.00              | 2                            | 0.00             | 1.66             | 0.73             | 0.00             |
| P29699          | Alpha-2-HS-glycoprotein                              | 337                      | 5                                  | 45                     | 81                          | 0.0052              | 26.37              | 26               | 4.26              | 3.18              |                   |                   |                              |                  |                  |                  |                  |



|        |                                                                     |      |    |      |      |        |       |     |        |        |        |       |    |       |       |       |       |
|--------|---------------------------------------------------------------------|------|----|------|------|--------|-------|-----|--------|--------|--------|-------|----|-------|-------|-------|-------|
| Q3UHD6 | Sorting nexin-27                                                    | 260  | 4  | 29   | 573  | 0.1287 | 2.27  | 14  | 1.07   | 6.36   | 3.42   | 3.23  | 6  | 0.00  | 0.83  | 2.92  | 2.46  |
| Q99KC8 | von Willebrand factor A domain-containing protein 5A                | 181  | 3  | 10   | 1376 | 0.3910 | 1.71  | 2   | 0.00   | 0.00   | 1.71   | 0.00  | 0  | 0.00  | 0.00  | 0.00  | 0.00  |
| P43406 | Integrin alpha-V                                                    | 238  | 4  | 8    | 1139 | 0.2086 | 2.99  | 3   | 2.13   | 0.00   | 0.86   | 0.00  | 0  | 0.00  | 0.00  | 0.00  | 0.00  |
| Q64288 | Olfactory marker protein                                            | 534  | 9  | 152  | 1224 | 0.7390 | -1.29 | 57  | 17.05  | 8.48   | 21.40  | 9.70  | 73 | 25.23 | 39.75 | 0.00  | 8.20  |
| P14685 | 26S proteasome non-ATPase regulatory subunit 3                      | 183  | 3  | 10   | 1181 | 0.2028 | -2.40 | 0   | 0.00   | 0.00   | 0.00   | 0.00  | 2  | 0.76  | 0.00  | 0.00  | 1.64  |
| Q06890 | Clusterin                                                           | 358  | 6  | 72   | 122  | 0.0341 | 9.06  | 22  | 4.26   | 4.24   | 3.42   | 9.70  | 2  | 0.00  | 1.66  | 0.73  | 0.00  |
| P61290 | Proteasome activator complex subunit 3                              | 154  | 3  | 10   | 572  | 0.0707 | -3.88 | 0   | 0.00   | 0.00   | 0.00   | 0.00  | 4  | 0.76  | 1.66  | 1.46  | 0.00  |
| P24270 | Catalase                                                            | 282  | 4  | 21   | 1363 | 0.5854 | 1.68  | 9   | 3.20   | 0.00   | 0.86   | 4.85  | 5  | 2.29  | 0.00  | 2.19  | 0.82  |
| P03911 | NADH-ubiquinone oxidoreductase chain 4                              | 218  | 4  | 23   | 1072 | 0.3508 | -3.79 | 1   | 0.00   | 0.00   | 0.86   | 0.00  | 3  | 0.76  | 1.66  | 0.00  | 0.82  |
| Q8BMG7 | Rab3 GTPase-activating protein non-catalytic subunit                | 157  | 3  | 14   | 1184 | 0.9439 | 1.56  | 5   | 3.20   | 0.00   | 1.71   | 0.00  | 3  | 0.76  | 0.83  | 0.73  | 0.82  |
| Q9CZW4 | Long-chain-fatty-acid-CoA ligase 3                                  | 189  | 3  | 8    | 1223 | 0.1837 | 1.92  | 2   | 1.07   | 0.00   | 0.86   | 0.00  | 0  | 0.00  | 0.00  | 0.00  | 0.00  |
| P14106 | Complement C1q subcomponent subunit B                               | 324  | 5  | 148  | 1    | 0.0024 | 10.20 | 66  | 14.92  | 18.01  | 10.27  | 22.63 | 6  | 1.53  | 0.83  | 0.00  | 4.10  |
| P55012 | Solute carrier family 12 member 2                                   | 187  | 3  | 14   | 1247 | 0.5014 | -2.43 | 2   | 0.00   | 1.06   | 0.86   | 0.00  | 5  | 2.29  | 0.00  | 0.73  | 1.64  |
| P08226 | Apolipoprotein E                                                    | 723  | 11 | 527  | 269  | 0.0934 | 2.74  | 99  | 38.36  | 27.55  | 15.41  | 17.78 | 36 | 3.82  | 10.77 | 4.38  | 17.22 |
| Q8C167 | Prolyl endopeptidase-like                                           | 192  | 3  | 15   | 1142 | 0.3424 | -2.47 | 2   | 1.07   | 0.00   | 0.86   | 0.00  | 5  | 1.53  | 2.48  | 0.73  | 0.00  |
| P16332 | Methylmalonyl-CoA mutase, mitochondrial                             | 352  | 5  | 29   | 1540 | 0.9829 | -1.23 | 6   | 4.26   | 0.00   | 1.71   | 0.00  | 7  | 0.76  | 0.00  | 0.00  | 6.56  |
| P61148 | Heparin-binding growth factor 1                                     | 124  | 2  | 41   | 1075 | 0.7926 | 1.44  | 15  | 5.33   | 3.18   | 0.00   | 6.47  | 10 | 1.53  | 2.48  | 1.46  | 4.92  |
| Q5SUR0 | Phosphoribosylformylglycinamide synthase                            | 732  | 12 | 128  | 1424 | 0.6240 | 1.01  | 31  | 7.46   | 9.54   | 9.41   | 4.85  | 31 | 12.23 | 14.08 | 1.46  | 3.28  |
| Q5SSL4 | Active breakpoint cluster region-related protein                    | 338  | 5  | 41   | 535  | 0.2354 | -1.91 | 9   | 0.00   | 1.06   | 7.70   | 0.00  | 17 | 1.53  | 4.14  | 3.65  | 7.38  |
| Q69ZK0 | Phosphatidylinositol 3,4,5-trisphosphate-dependent Rac exchanger 1  | 210  | 4  | 17   | 763  | 0.1039 | 13.42 | 10  | 1.07   | 5.30   | 3.42   | 0.00  | 1  | 0.00  | 0.00  | 0.73  | 0.00  |
| Q9Z0J4 | Nitric oxide synthase, brain                                        | 170  | 3  | 14   | 1144 | 0.7015 | 2.51  | 6   | 4.26   | 0.00   | 1.71   | 0.00  | 2  | 0.00  | 0.83  | 0.73  | 0.82  |
| P21981 | Protein-glutamine gamma-glutamyltransferase 2                       | 165  | 3  | 10   | 582  | 0.0591 | 2.98  | 3   | 1.07   | 1.06   | 0.86   | 0.00  | 0  | 0.00  | 0.00  | 0.00  | 0.00  |
| P39054 | Dynamin-2                                                           | 123  | 2  | 5    | 1567 | ?      | 0.00  | 0   | 0.00   | 0.00   | 0.00   | 0.00  | 0  | 0.00  | 0.00  | 0.00  | 0.00  |
| Q64737 | Trifunctional purine biosynthetic protein adenosine-3               | 175  | 3  | 44   | 134  | 0.1275 | -2.62 | 5   | 1.07   | 0.00   | 4.28   | 0.00  | 14 | 5.35  | 1.66  | 2.92  | 4.10  |
| Q8QZY1 | Eukaryotic translation initiation factor 3 subunit L                | 168  | 3  | 7    | 1506 | 0.8774 | 1.45  | 1   | 0.00   | 1.06   | 0.00   | 0.00  | 1  | 0.00  | 0.00  | 0.73  | 0.00  |
| P26041 | Moesin                                                              | 354  | 6  | 69   | 178  | 0.0432 | 4.16  | 27  | 8.53   | 3.18   | 6.85   | 8.08  | 6  | 2.29  | 1.66  | 0.00  | 2.46  |
| P97371 | Proteasome activator complex subunit 1                              | 235  | 3  | 37   | 757  | 0.2696 | 2.07  | 15  | 5.33   | 1.06   | 1.71   | 6.47  | 7  | 3.82  | 1.66  | 0.73  | 0.82  |
| Q0KL02 | Triple functional domain protein                                    | 150  | 3  | 9    | 1435 | 0.6160 | -1.13 | 2   | 2.13   | 0.00   | 0.00   | 0.00  | 2  | 0.76  | 0.83  | 0.00  | 0.82  |
| Q8VE33 | Ganglioside-induced differentiation-associated protein 1-like 1     | 134  | 2  | 25   | 1103 | 0.2392 | -5.46 | 2   | 0.00   | 0.00   | 1.71   | 0.00  | 9  | 0.00  | 4.97  | 4.38  | 0.00  |
| Q55029 | Coatamer subunit beta'                                              | 254  | 4  | 7    | 1522 | 0.3910 | -0.83 | 0   | 0.00   | 0.00   | 0.00   | 0.00  | 1  | 0.00  | 0.83  | 0.00  | 0.00  |
| P70336 | Rho-associated protein kinase 2                                     | 571  | 9  | 66   | 848  | 0.2669 | -1.24 | 18  | 3.20   | 3.18   | 8.56   | 3.23  | 23 | 3.06  | 4.97  | 8.02  | 6.56  |
| Q9Z1Q9 | Valyl-tRNA synthetase                                               | 694  | 10 | 100  | 939  | 0.1998 | 1.33  | 28  | 8.53   | 7.42   | 8.56   | 3.23  | 21 | 11.47 | 4.97  | 3.65  | 0.82  |
| Q920Q4 | Vacuolar protein sorting-associated protein 16 homolog              | 195  | 3  | 6    | 1519 | 0.3910 | 0.86  | 1   | 0.00   | 0.00   | 0.86   | 0.00  | 0  | 0.00  | 0.00  | 0.00  | 0.00  |
| Q9Z0H4 | CUGBP Elav-like family member 2                                     | 227  | 3  | 43   | 310  | 0.0653 | 36.81 | 27  | 11.72  | 0.00   | 10.27  | 4.85  | 1  | 0.00  | 0.00  | 0.73  | 0.00  |
| Q61838 | Alpha-2-macroglobulin                                               | 1197 | 18 | 344  | 11   | 0.0008 | 2.78  | 151 | 31.97  | 31.79  | 58.20  | 29.10 | 54 | 10.70 | 14.08 | 18.96 | 10.66 |
| Q3U5Q7 | UMP-CMP kinase 2, mitochondrial                                     | 168  | 3  | 8    | 1307 | 0.3910 | 2.35  | 2   | 0.00   | 0.00   | 1.71   | 0.00  | 1  | 0.00  | 0.00  | 0.73  | 0.00  |
| O08638 | Myosin-11                                                           | 126  | 2  | 6    | 1087 | 0.1818 | 3.33  | 3   | 0.00   | 0.00   | 1.71   | 1.62  | 0  | 0.00  | 0.00  | 0.00  | 0.00  |
| P23116 | Eukaryotic translation initiation factor 3 subunit A                | 244  | 4  | 98   | 1205 | 0.7765 | -1.20 | 30  | 4.26   | 10.60  | 8.56   | 6.47  | 36 | 16.82 | 6.63  | 6.56  | 5.74  |
| P03995 | Glial fibrillary acidic protein                                     | 1672 | 22 | 2036 | 44   | 0.0059 | 8.85  | 767 | 165.18 | 334.84 | 186.57 | 80.84 | 87 | 11.47 | 34.78 | 17.50 | 22.96 |
| Q91W50 | Cold shock domain-containing protein E1                             | 222  | 4  | 13   | 1397 | 0.6402 | -1.64 | 3   | 2.13   | 0.00   | 0.86   | 0.00  | 5  | 0.76  | 2.48  | 0.00  | 1.64  |
| Q6P5E4 | UDP-glucose:glycoprotein glucosyltransferase 1                      | 462  | 8  | 38   | 580  | 0.0720 | 1.84  | 15  | 3.20   | 2.12   | 6.85   | 3.23  | 8  | 1.53  | 0.00  | 4.38  | 2.46  |
| Q8R3P0 | Aspartoacylase                                                      | 189  | 3  | 72   | 1281 | 0.5404 | -1.19 | 17  | 5.33   | 8.48   | 3.42   | 0.00  | 21 | 3.06  | 5.80  | 5.10  | 6.56  |
| Q8BTM8 | Filamin-A                                                           | 1001 | 16 | 158  | 169  | 0.0025 | 12.76 | 59  | 17.05  | 5.30   | 26.53  | 9.70  | 5  | 0.76  | 0.00  | 2.19  | 1.64  |
| Q9WTM5 | RuvB-like 2                                                         | 165  | 3  | 6    | 1420 | 0.7352 | 2.58  | 2   | 0.00   | 2.12   | 0.00   | 0.00  | 1  | 0.00  | 0.00  | 0.00  | 0.82  |
| Q01730 | Ras suppressor protein 1                                            | 133  | 2  | 9    | 1295 | 0.1820 | -1.59 | 0   | 0.00   | 0.00   | 0.00   | 0.00  | 2  | 0.76  | 0.83  | 0.00  | 0.00  |
| Q9Z1Z0 | General vesicular transport factor p115                             | 631  | 11 | 81   | 1383 | 0.6395 | -1.07 | 26  | 4.26   | 6.36   | 15.41  | 0.00  | 28 | 7.65  | 5.80  | 3.65  | 10.66 |
| Q00493 | Carboxypeptidase E                                                  | 237  | 4  | 57   | 570  | 0.1162 | 2.20  | 22  | 5.33   | 5.30   | 7.70   | 3.23  | 10 | 3.06  | 0.00  | 5.10  | 1.64  |
| Q9CS84 | Neurexin-1-alpha                                                    | 754  | 12 | 160  | 302  | 0.1355 | 2.82  | 64  | 24.51  | 5.30   | 23.11  | 11.32 | 23 | 0.76  | 3.31  | 14.58 | 4.10  |
| Q80X90 | Filamin-B                                                           | 167  | 3  | 11   | 1557 | ?      | 0.00  | 0   | 0.00   | 0.00   | 0.00   | 0.00  | 0  | 0.00  | 0.00  | 0.00  | 0.00  |
| Q8R2K1 | Protein fucU homolog                                                | 201  | 3  | 70   | 822  | 0.4632 | -1.58 | 16  | 5.33   | 0.00   | 5.99   | 4.85  | 26 | 3.82  | 9.94  | 3.65  | 8.20  |
| P56812 | Programmed cell death protein 5                                     | 209  | 3  | 40   | 1255 | 0.6540 | -1.33 | 8   | 4.26   | 0.00   | 2.57   | 1.62  | 11 | 3.06  | 4.97  | 0.73  | 2.46  |
| Q8BJI1 | Orphan sodium- and chloride-dependent neurotransmitter transporter  | 194  | 3  | 45   | 22   | 0.0175 | 7.41  | 22  | 2.13   | 5.30   | 6.85   | 8.08  | 3  | 0.00  | 0.83  | 2.19  | 0.00  |
| Q3V0K9 | Plastin-1                                                           | 114  | 2  | 5    | 1499 | 0.3910 | 1.07  | 1   | 1.07   | 0.00   | 0.00   | 0.00  | 0  | 0.00  | 0.00  | 0.00  | 0.00  |
| P31230 | Aminoacyl-tRNA synthase complex-interacting multifunctional protein | 162  | 3  | 18   | 905  | 0.0895 | -7.96 | 0   | 0.00   | 0.00   | 0.00   | 0.00  | 8  | 1.53  | 4.97  | 1.46  | 0.00  |
| P13020 | Gelsolin                                                            | 502  | 7  | 138  | 335  | 0.0320 | 4.44  | 54  | 13.85  | 1.06   | 26.53  | 12.93 | 12 | 6.88  | 0.00  | 2.92  | 2.46  |
| Q80U28 | MAP kinase-activating death domain protein                          | 168  | 3  | 8    | 1315 | 0.4350 | -2.64 | 1   | 0.00   | 0.00   | 0.86   | 0.00  | 2  | 1.53  | 0.00  | 0.73  | 0.00  |
| Q99PL6 | UBX domain-containing protein 6                                     | 251  | 4  | 18   | 1094 | 0.2240 | -5.33 | 2   | 0.00   | 0.00   | 1.71   | 0.00  | 9  | 6.12  | 0.00  | 2.19  | 0.82  |
| Q78PY7 | Staphylococcal nuclease domain-containing protein 1                 | 541  | 8  | 122  | 1207 | 0.8838 | 1.29  | 34  | 13.85  | 9.54   | 10.27  | 0.00  | 26 | 5.35  | 5.80  | 5.10  | 9.84  |
| Q9Z2W0 | Aspartyl aminopeptidase                                             | 160  | 3  | 7    | 1305 | 0.5882 | 6.65  | 5   | 0.00   | 0.00   | 0.00   | 4.85  | 1  | 0.00  | 0.00  | 0.73  | 0.00  |
| Q9EQZ6 | Rap guanine nucleotide exchange factor 4                            | 142  | 2  | 14   | 1357 | 0.5664 | 2.59  | 4   | 2.13   | 2.12   | 0.00   | 0.00  | 2  | 0.00  | 0.00  | 0.00  | 1.64  |
| P08905 | Lysozyme C-2                                                        | 136  | 2  | 31   | 2    | 0.0005 | 23.17 | 23  | 4.26   | 6.36   | 7.70   | 4.85  | 0  | 0.00  | 0.00  | 0.00  | 0.00  |
| Q9CYL5 | Golgi-associated plant pathogenesis-related protein 1               | 150  | 2  | 7    | 1561 | ?      | 0.00  | 0   | 0.00   | 0.00   | 0.00   | 0.00  | 0  | 0.00  | 0.00  | 0.00  | 0.00  |
| P29758 | Ornithine aminotransferase, mitochondrial                           | 184  | 3  | 21   | 1067 | 0.2227 | -7.57 | 0   | 0.00   | 0.00   | 0.00   | 0.00  | 8  | 6.12  | 0.00  | 1.46  | 0.00  |
| Q99K51 | Plastin-3                                                           | 555  | 8  | 91   | 766  | 0.2895 | 1.40  | 33  | 6.39   | 9.54   | 8.56   | 8.08  | 23 | 3.82  | 9.11  | 9.48  | 0.82  |
| Q8QZS1 | 3-hydroxyisobutyryl-CoA hydrolase, mitochondrial                    | 661  | 10 | 97   | 840  | 0.4093 | -1.48 | 19  | 6.39   | 8.48   | 4.28   | 0.00  | 28 | 10.70 | 5.80  | 3.65  | 8.20  |
| Q9CPW4 | Actin-related protein 2/3 complex subunit 5                         | 173  | 3  | 95   | 1346 | 0.8890 | -1.07 | 29  | 6.39   | 5.30   | 4.28   | 12.93 | 31 | 6.88  | 13.25 | 6.56  | 4.10  |
| Q00612 | Glucose-6-phosphate 1-dehydrogenase X                               | 195  | 3  | 18   | 1128 | 0.1895 | 2.78  | 3   | 1.07   | 0.00   | 1.71   | 0.00  | 0  | 0.00  | 0.00  | 0.00  | 0.00  |
| Q92111 | Serotransferrin                                                     | 1729 | 26 | 463  | 213  | 0.1463 | 3.29  | 196 | 9.59   | 58.28  | 70.18  | 58.20 | 60 | 13.00 | 14.91 | 27.71 | 4.10  |
| Q9D0R2 | Threonyl-tRNA synthetase, cytoplasmic                               | 418  | 7  | 64   | 670  | 0.1930 | -2.10 | 11  | 2.13   | 0.00   | 5.99   | 3.23  | 24 | 5.35  | 4.97  | 3.65  | 9.84  |
| P01837 | Ig kappa chain C region                                             | 121  | 2  | 28   | 1216 | 0.3798 | 5.24  | 8   | 2.13   | 0.00   | 5.99   | 0.00  | 2  | 0.00  | 0.00  | 0.73  | 0.82  |
| P26039 | Talin-1                                                             | 1321 | 19 | 202  | 1242 | 0.9339 | 1.03  | 47  | 18.12  | 7.42   | 14.55  | 6.47  | 45 | 19.88 | 8.28  | 6.56  | 10.66 |
| Q91YP2 | Neurolysin, mitochondrial                                           | 184  | 3  | 20   | 1131 | 0.3816 | 3.01  | 7   | 1.07   | 2.12   | 4.28   | 0.00  | 2  | 0.00  | 1.66  | 0.00  | 0.82  |
| Q80WQ2 | Protein VAC14 homolog                                               | 159  | 3  | 6    | 1560 | ?      | 0.00  | 0   | 0.00   | 0.00   | 0.00   | 0.00  | 0  | 0.00  | 0.00  | 0.00  | 0.00  |
| Q63912 | Oligodendrocyte-myelin glycoprotein                                 | 239  | 4  | 43   | 1167 | 0.2835 | 1.99  | 9   | 1.07   | 4.24   | 3.42   | 0.00  | 4  | 0.00  | 0.00  | 4.38  | 0.00  |
| Q921E2 | Ras-related protein Rab-31                                          | 142  | 2  | 22   | 561  | 0.1029 | -8.28 | 1   | 0.00   | 1.06   | 0.00   | 0.00  | 9  | 0.00  | 2.48  | 2.19  | 4.10  |
| Q9JLB0 | MAGUK p55 subfamily member 6                                        | 278  | 4  | 36   |      |        |       |     |        |        |        |       |    |       |       |       |       |

|        |                                                                         |      |    |     |      |        |       |     |       |       |       |       |     |       |       |       |       |
|--------|-------------------------------------------------------------------------|------|----|-----|------|--------|-------|-----|-------|-------|-------|-------|-----|-------|-------|-------|-------|
| Q8VDJ3 | Vigilin                                                                 | 293  | 5  | 27  | 1539 | 0.9476 | -1.05 | 7   | 3.20  | 3.18  | 0.86  | 0.00  | 8   | 1.53  | 1.66  | 4.38  | 0.00  |
| Q05512 | Serine/threonine-protein kinase MARK2                                   | 158  | 2  | 19  | 1445 | 0.7632 | 2.22  | 2   | 0.00  | 0.00  | 0.00  | 1.62  | 1   | 0.00  | 0.00  | 0.73  | 0.00  |
| Q6PHS9 | Voltage-dependent calcium channel subunit alpha-2/delta-2               | 501  | 8  | 81  | 184  | 0.0337 | 3.52  | 32  | 13.85 | 1.06  | 10.27 | 6.47  | 9   | 5.35  | 0.00  | 3.65  | 0.00  |
| Q922D8 | C-1-tetrahydrofolate synthase, cytoplasmic                              | 634  | 10 | 89  | 126  | 0.1558 | -2.25 | 11  | 0.00  | 6.36  | 5.14  | 0.00  | 26  | 4.59  | 5.80  | 7.29  | 8.20  |
| Q99NB9 | Splicing factor 3B subunit 1                                            | 501  | 9  | 46  | 220  | 0.1655 | 1.73  | 19  | 5.33  | 4.24  | 4.28  | 4.85  | 11  | 8.41  | 0.00  | 0.73  | 1.64  |
| Q60854 | Serpin B6                                                               | 185  | 3  | 22  | 529  | 0.0588 | -5.22 | 1   | 1.07  | 0.00  | 0.00  | 0.00  | 6   | 1.53  | 2.48  | 0.73  | 0.82  |
| Q7TMB8 | Cytoplasmic FMR1-interacting protein 1                                  | 474  | 7  | 80  | 172  | 0.0716 | 1.89  | 31  | 7.46  | 4.24  | 11.13 | 8.08  | 16  | 4.59  | 4.14  | 4.38  | 3.28  |
| Q61656 | Probable ATP-dependent RNA helicase DDX5                                | 355  | 6  | 99  | 192  | 0.0346 | 1.62  | 32  | 8.53  | 8.48  | 6.85  | 8.08  | 20  | 6.12  | 6.63  | 3.65  | 3.28  |
| Q01405 | Protein transport protein Sec23A                                        | 455  | 7  | 48  | 1111 | 0.9005 | 1.48  | 11  | 2.13  | 0.00  | 6.85  | 1.62  | 7   | 0.76  | 1.66  | 1.46  | 3.28  |
| Q6WVG3 | BTB/POZ domain-containing protein KCTD12                                | 367  | 6  | 59  | 1447 | 0.7877 | -1.04 | 14  | 2.13  | 7.42  | 4.28  | 0.00  | 14  | 4.59  | 4.14  | 0.73  | 4.92  |
| P02089 | Hemoglobin subunit beta-2                                               | 200  | 3  | 318 | 1263 | 0.5609 | -1.11 | 76  | 43.69 | 12.72 | 19.68 | 0.00  | 84  | 15.29 | 12.42 | 21.15 | 35.26 |
| Q9QYF1 | Retinol dehydrogenase 11                                                | 140  | 2  | 18  | 1319 | 0.4059 | 1.24  | 5   | 2.13  | 1.06  | 0.00  | 1.62  | 4   | 3.06  | 0.00  | 0.00  | 0.82  |
| Q9DCS3 | Trans-2-enoyl-CoA reductase, mitochondrial                              | 259  | 4  | 46  | 1244 | 0.6668 | 1.08  | 13  | 1.07  | 8.48  | 3.42  | 0.00  | 12  | 2.29  | 5.80  | 1.46  | 2.46  |
| Q92511 | ATPase family AAA domain-containing protein 3                           | 173  | 3  | 15  | 1481 | 0.7774 | 1.64  | 5   | 0.00  | 3.18  | 1.71  | 0.00  | 3   | 1.53  | 0.00  | 1.46  | 0.00  |
| Q8K2T1 | NmrA-like family domain-containing protein 1                            | 201  | 3  | 20  | 873  | 0.3635 | -3.46 | 3   | 0.00  | 0.00  | 2.57  | 0.00  | 9   | 2.29  | 3.31  | 0.00  | 3.28  |
| Q64727 | Vinculin                                                                | 1609 | 24 | 228 | 440  | 0.0540 | 2.55  | 90  | 24.51 | 30.73 | 21.40 | 12.93 | 35  | 3.82  | 9.11  | 19.69 | 2.46  |
| Q61137 | Astroctactin-1                                                          | 242  | 4  | 21  | 1293 | 0.5204 | 2.11  | 7   | 2.13  | 1.06  | 3.42  | 0.00  | 3   | 0.76  | 0.00  | 0.73  | 1.64  |
| P47791 | Glutathione reductase, mitochondrial                                    | 179  | 3  | 27  | 1375 | 0.6294 | -1.27 | 6   | 1.07  | 1.06  | 2.57  | 1.62  | 8   | 0.76  | 2.48  | 1.46  | 3.28  |
| Q9CQF9 | Prenylcysteine oxidase                                                  | 185  | 3  | 21  | 1336 | 0.5679 | 3.37  | 6   | 2.13  | 0.00  | 3.42  | 0.00  | 2   | 0.00  | 0.83  | 0.00  | 0.82  |
| Q9CWI9 | Bifunctional purine biosynthesis protein PURH                           | 999  | 15 | 172 | 845  | 0.3743 | 1.41  | 53  | 15.99 | 12.72 | 21.40 | 3.23  | 38  | 9.17  | 17.39 | 8.02  | 3.28  |
| Q08642 | Protein-arginine deiminase type-2                                       | 352  | 6  | 28  | 578  | 0.1922 | 2.33  | 9   | 3.20  | 1.06  | 3.42  | 1.62  | 4   | 1.53  | 0.00  | 0.00  | 2.46  |
| Q99MN1 | Lysyl-tRNA synthetase                                                   | 179  | 3  | 12  | 1443 | 0.7962 | -2.39 | 2   | 1.07  | 0.00  | 0.86  | 0.00  | 5   | 4.59  | 0.00  | 0.00  | 0.00  |
| P13707 | Glycerol-3-phosphate dehydrogenase [NAD+], cytoplasmic                  | 694  | 11 | 255 | 613  | 0.3270 | -1.85 | 46  | 10.66 | 20.13 | 15.41 | 0.00  | 86  | 16.06 | 30.64 | 10.94 | 27.88 |
| Q9D1A2 | Cytosolic non-specific dipeptidase                                      | 507  | 8  | 100 | 941  | 0.3936 | 1.27  | 27  | 6.39  | 3.18  | 7.70  | 9.70  | 21  | 9.94  | 2.48  | 2.19  | 6.56  |
| Q9DAW9 | Calponin-3                                                              | 108  | 2  | 8   | 1404 | 0.3910 | 1.62  | 2   | 0.00  | 0.00  | 0.00  | 1.62  | 0   | 0.00  | 0.00  | 0.00  | 0.00  |
| Q91VM9 | Inorganic pyrophosphatase 2, mitochondrial                              | 373  | 6  | 69  | 1351 | 0.9145 | 1.34  | 23  | 4.26  | 6.36  | 11.98 | 0.00  | 17  | 3.06  | 9.94  | 1.46  | 2.46  |
| P45952 | Medium-chain specific acyl-CoA dehydrogenase, mitochondrial             | 136  | 2  | 6   | 1349 | 0.5517 | -2.75 | 1   | 0.00  | 0.00  | 0.86  | 0.00  | 2   | 1.53  | 0.83  | 0.00  | 0.00  |
| Q921G7 | Electron transfer flavoprotein-ubiquinone oxidoreductase, mitochondrial | 383  | 6  | 53  | 85   | 0.0007 | 10.86 | 26  | 4.26  | 11.66 | 5.14  | 4.85  | 2   | 0.00  | 1.66  | 0.73  | 0.00  |
| Q9Z110 | Delta-1-pyrroline-5-carboxylate synthase                                | 173  | 3  | 6   | 1516 | 0.9042 | -1.37 | 1   | 1.07  | 0.00  | 0.00  | 0.00  | 1   | 0.00  | 0.00  | 1.46  | 0.00  |
| Q8BKC5 | Importin-5                                                              | 1174 | 19 | 208 | 1245 | 0.8956 | 1.11  | 63  | 20.25 | 19.07 | 20.54 | 3.23  | 57  | 11.47 | 11.59 | 16.77 | 17.22 |
| Q64133 | Amine oxidase [flavin-containing] A                                     | 143  | 2  | 16  | 1330 | 0.8191 | 1.66  | 4   | 0.00  | 2.12  | 1.71  | 0.00  | 2   | 0.76  | 0.00  | 0.73  | 0.82  |
| P38640 | Unknown protein from 2D-PAGE of fibroblasts (Fragment)                  | 163  | 3  | 19  | 1467 | 0.3584 | -1.10 | 5   | 0.00  | 4.24  | 0.86  | 0.00  | 6   | 0.76  | 3.31  | 0.73  | 0.82  |
| P47199 | Quinone oxidoreductase                                                  | 214  | 4  | 67  | 221  | 0.1870 | -1.83 | 11  | 1.07  | 3.18  | 6.85  | 0.00  | 20  | 5.35  | 4.14  | 5.83  | 4.92  |
| Q91V64 | Isochorismatase domain-containing protein 1                             | 259  | 4  | 40  | 1409 | 0.7404 | 1.09  | 11  | 1.07  | 5.30  | 1.71  | 3.23  | 10  | 2.29  | 5.80  | 1.46  | 0.82  |
| Q61292 | Laminin subunit beta-2                                                  | 731  | 12 | 102 | 199  | 0.0621 | 3.96  | 41  | 18.12 | 3.18  | 13.69 | 6.47  | 10  | 1.53  | 1.66  | 7.29  | 0.00  |
| Q9WU78 | Programmed cell death 6-interacting protein                             | 335  | 5  | 26  | 1490 | 0.7592 | -1.45 | 2   | 0.00  | 0.00  | 1.71  | 0.00  | 2   | 0.00  | 1.66  | 0.00  | 0.82  |
| Q922B2 | Aspartyl-tRNA synthetase, cytoplasmic                                   | 442  | 7  | 104 | 341  | 0.1337 | 1.49  | 34  | 8.53  | 12.72 | 7.70  | 4.85  | 23  | 6.88  | 5.80  | 5.10  | 4.92  |
| P35235 | Tyrosine-protein phosphatase non-receptor type 11                       | 299  | 5  | 65  | 953  | 0.2226 | 1.34  | 21  | 5.33  | 8.48  | 5.99  | 1.62  | 16  | 3.82  | 4.14  | 8.02  | 0.00  |
| Q9JLV5 | Cullin-3                                                                | 670  | 10 | 99  | 958  | 0.3232 | -1.15 | 27  | 3.20  | 2.12  | 8.56  | 12.93 | 31  | 6.12  | 4.14  | 6.56  | 13.94 |
| Q5SWU9 | Acetyl-CoA carboxylase 1                                                | 240  | 4  | 29  | 600  | 0.4692 | 2.81  | 16  | 3.20  | 0.00  | 5.99  | 6.47  | 6   | 1.53  | 2.48  | 0.73  | 0.82  |
| P27601 | Guanine nucleotide-binding protein subunit alpha-13                     | 180  | 3  | 11  | 1506 | 0.8774 | 1.45  | 1   | 0.00  | 1.06  | 0.00  | 0.00  | 1   | 0.00  | 0.00  | 0.73  | 0.00  |
| Q91VR5 | ATP-dependent RNA helicase DDX1                                         | 630  | 11 | 126 | 1337 | 0.7620 | -1.24 | 22  | 2.13  | 8.48  | 10.27 | 1.62  | 28  | 8.41  | 6.63  | 1.46  | 11.48 |
| Q3TXS7 | 26S proteasome non-ATPase regulatory subunit 1                          | 574  | 9  | 117 | 1411 | 0.9524 | 1.21  | 30  | 10.66 | 9.54  | 9.41  | 0.00  | 24  | 5.35  | 0.83  | 5.10  | 13.12 |
| Q8BU30 | Isoleucyl-tRNA synthetase, cytoplasmic                                  | 279  | 5  | 56  | 679  | 0.4433 | 2.05  | 23  | 10.66 | 1.06  | 7.70  | 3.23  | 11  | 3.06  | 4.14  | 2.19  | 1.64  |
| Q9D4H8 | Cullin-2                                                                | 181  | 3  | 28  | 703  | 0.1784 | -3.43 | 3   | 0.00  | 0.00  | 2.57  | 0.00  | 9   | 0.76  | 2.48  | 1.46  | 4.10  |
| Q9WUA2 | Phenylalanyl-tRNA synthetase beta chain                                 | 177  | 3  | 27  | 80   | 0.0026 | 17.62 | 15  | 2.13  | 7.42  | 3.42  | 1.62  | 1   | 0.00  | 0.83  | 0.00  | 0.00  |
| Q8R0Y6 | 10-formyltetrahydrofolate dehydrogenase                                 | 1912 | 27 | 497 | 1053 | 0.7944 | 1.29  | 125 | 1.07  | 39.21 | 55.63 | 29.10 | 97  | 25.23 | 20.70 | 16.77 | 34.44 |
| Q64331 | Myosin-VI                                                               | 649  | 10 | 104 | 141  | 0.0768 | 2.13  | 38  | 11.72 | 11.66 | 10.27 | 4.85  | 18  | 7.65  | 4.14  | 2.19  | 4.10  |
| Q99PU5 | Long-chain-fatty-acid-CoA ligase ACSBG1                                 | 935  | 13 | 197 | 398  | 0.2689 | 1.65  | 53  | 9.59  | 11.66 | 22.25 | 9.70  | 32  | 11.47 | 8.28  | 5.10  | 7.38  |
| Q80WM4 | Hyaluronan and proteoglycan link protein 4                              | 180  | 3  | 10  | 1312 | 0.3910 | -2.29 | 0   | 0.00  | 0.00  | 0.00  | 0.00  | 2   | 2.29  | 0.00  | 0.00  | 0.00  |
| Q91WC3 | Long-chain-fatty-acid-CoA ligase 6                                      | 960  | 15 | 295 | 232  | 0.0565 | 2.87  | 115 | 19.18 | 26.49 | 35.09 | 33.95 | 40  | 17.58 | 4.97  | 11.67 | 5.74  |
| Q641P0 | Actin-related protein 3B                                                | 126  | 2  | 20  | 834  | 0.0753 | -3.07 | 3   | 0.00  | 1.06  | 1.71  | 0.00  | 9   | 0.00  | 2.48  | 4.38  | 1.64  |
| Q64514 | Tripeptidyl-peptidase 2                                                 | 1382 | 23 | 388 | 371  | 0.1610 | 1.28  | 138 | 46.89 | 33.91 | 32.52 | 24.25 | 108 | 27.52 | 37.27 | 23.34 | 19.68 |
| Q7TMK9 | Heterogeneous nuclear ribonucleoprotein Q                               | 460  | 8  | 79  | 851  | 0.5219 | 1.21  | 22  | 5.33  | 5.30  | 7.70  | 3.23  | 18  | 7.65  | 2.48  | 3.65  | 4.10  |
| Q9WVK4 | EH domain-containing protein 1                                          | 203  | 3  | 11  | 1299 | 0.1819 | -1.58 | 0   | 0.00  | 0.00  | 0.00  | 0.00  | 2   | 0.76  | 0.00  | 0.00  | 0.82  |
| Q9DBL7 | Bifunctional coenzyme A synthase                                        | 163  | 3  | 8   | 1124 | 0.2374 | -4.04 | 0   | 0.00  | 0.00  | 0.00  | 0.00  | 4   | 0.76  | 0.00  | 0.00  | 3.28  |
| Q9Z0S1 | 3(2),5-bisphosphate nucleotidase 1                                      | 770  | 11 | 210 | 892  | 0.4537 | -1.42 | 48  | 11.72 | 16.95 | 19.68 | 0.00  | 68  | 17.58 | 21.53 | 8.02  | 21.32 |
| P37040 | NADPH-cytochrome P450 reductase                                         | 231  | 4  | 13  | 1396 | 0.3910 | -1.64 | 0   | 0.00  | 0.00  | 0.00  | 0.00  | 2   | 0.00  | 0.00  | 0.00  | 1.64  |
| Q8CGC7 | Bifunctional aminoacyl-tRNA synthetase                                  | 765  | 13 | 97  | 75   | 0.0323 | 2.28  | 41  | 11.72 | 6.36  | 6.85  | 16.17 | 18  | 4.59  | 4.14  | 4.38  | 4.92  |
| Q91WQ3 | Tyrosyl-tRNA synthetase, cytoplasmic                                    | 375  | 6  | 51  | 919  | 0.4373 | 1.90  | 16  | 2.13  | 3.18  | 9.41  | 1.62  | 9   | 6.12  | 1.66  | 0.00  | 0.82  |
| P08003 | Protein disulfide-isomerase A4                                          | 464  | 7  | 67  | 265  | 0.0871 | 2.67  | 27  | 2.13  | 8.48  | 8.56  | 8.08  | 10  | 1.53  | 0.83  | 2.92  | 4.92  |
| O54865 | Guanylate cyclase soluble subunit beta-1                                | 251  | 4  | 18  | 1482 | 0.7622 | 1.61  | 4   | 0.00  | 1.06  | 2.57  | 0.00  | 2   | 1.53  | 0.00  | 0.73  | 0.00  |
| P52196 | Thiosulfate sulfurtransferase                                           | 458  | 7  | 218 | 280  | 0.1196 | 1.58  | 75  | 22.38 | 22.25 | 17.12 | 12.93 | 47  | 16.06 | 10.77 | 6.56  | 13.94 |
| Q9D4D4 | Transketolase-like protein 2                                            | 161  | 2  | 25  | 764  | 0.2482 | 3.46  | 11  | 1.07  | 0.00  | 3.42  | 6.47  | 3   | 1.53  | 0.00  | 0.00  | 1.64  |
| Q3U0V1 | Far upstream element-binding protein 2                                  | 617  | 9  | 155 | 345  | 0.1620 | 2.60  | 49  | 3.20  | 6.36  | 17.97 | 21.02 | 19  | 4.59  | 3.31  | 5.83  | 4.92  |
| Q99JY0 | Trifunctional enzyme subunit beta, mitochondrial                        | 430  | 7  | 106 | 323  | 0.0791 | 2.10  | 29  | 9.59  | 9.54  | 10.27 | 0.00  | 14  | 4.59  | 5.80  | 3.65  | 0.00  |
| Q8BL66 | Early endosome antigen 1                                                | 569  | 9  | 66  | 1381 | 0.7171 | -1.11 | 17  | 5.33  | 0.00  | 6.85  | 4.85  | 19  | 4.59  | 2.48  | 10.21 | 1.64  |
| P16045 | Galectin-1                                                              | 207  | 3  | 68  | 1341 | 0.8631 | 1.06  | 26  | 11.72 | 3.18  | 2.57  | 8.08  | 24  | 5.35  | 4.14  | 8.02  | 6.56  |
| O08914 | Fatty-acid amide hydrolase 1                                            | 164  | 2  | 22  | 741  | 0.0732 | 8.02  | 8   | 0.00  | 2.12  | 4.28  | 1.62  | 0   | 0.00  | 0.00  | 0.00  | 0.00  |
| P24527 | Leukotriene A-4 hydrolase                                               | 964  | 15 | 197 | 431  | 0.0308 | 2.36  | 82  | 12.79 | 33.91 | 22.25 | 12.93 | 35  | 6.12  | 18.22 | 8.75  | 1.64  |
| Q9CQR6 | Serine/threonine-protein phosphatase 6 catalytic subunit                | 275  | 5  | 35  | 162  | 0.1305 | -2.37 | 6   | 0.00  | 0.00  | 5.99  | 0.00  | 14  | 2.29  | 3.31  | 3.65  | 4.92  |
| Q9DCZ1 | GMP reductase 1                                                         | 214  | 3  | 7   | 783  | 0.0720 | -4.06 | 0   | 0.00  | 0.00  | 0.00  | 0.00  | 4   | 0.76  | 1.66  | 0.00  | 1.64  |
| Q9EQK5 | Major vault protein                                                     | 126  | 2  | 2   | 1566 | ?      | 0.00  | 0   | 0.00  | 0.00  | 0.00  | 0.00  | 0   | 0.00  | 0.00  | 0.00  | 0.00  |
| Q9CZU3 | Superkiller viralicidal activity 2-like 2                               | 167  | 2  | 2   | 1558 | ?      | 0.00  | 0   | 0.00  | 0.00  | 0.00  | 0.00  | 0   | 0.00  | 0.00  | 0.00  | 0.00  |
| Q8K400 | Syntaxin-binding protein 5                                              | 273  |    |     |      |        |       |     |       |       |       |       |     |       |       |       |       |

|        |                                                                   |      |    |      |      |        |        |     |        |        |        |        |     |       |       |       |        |
|--------|-------------------------------------------------------------------|------|----|------|------|--------|--------|-----|--------|--------|--------|--------|-----|-------|-------|-------|--------|
| Q9EPL8 | Importin-7                                                        | 658  | 10 | 141  | 1165 | 0.7176 | 1.22   | 40  | 11.72  | 7.42   | 17.97  | 3.23   | 33  | 6.12  | 4.97  | 14.58 | 7.38   |
| P35285 | Ras-related protein Rab-22A                                       | 141  | 2  | 42   | 1103 | 0.4655 | -1.44  | 8   | 4.26   | 1.06   | 2.57   | 0.00   | 11  | 1.53  | 2.48  | 6.56  | 0.82   |
| P42227 | Signal transducer and activator of transcription 3                | 208  | 3  | 11   | 1377 | 0.5875 | 2.34   | 2   | 0.00   | 1.06   | 0.86   | 0.00   | 1   | 0.00  | 0.00  | 0.00  | 0.82   |
| O08529 | Calpain-2 catalytic subunit                                       | 575  | 9  | 149  | 741  | 0.5092 | 1.34   | 46  | 15.99  | 5.30   | 16.26  | 8.08   | 34  | 9.94  | 5.80  | 5.10  | 13.12  |
| O35864 | COP9 signalosome complex subunit 5                                | 169  | 3  | 12   | 1397 | 0.6471 | 2.42   | 4   | 0.00   | 2.12   | 1.71   | 0.00   | 2   | 0.76  | 0.00  | 0.00  | 0.82   |
| Q99L04 | Dehydrogenase/reductase SDR family member 1                       | 641  | 10 | 272  | 34   | 0.0015 | 3.15   | 129 | 44.76  | 24.37  | 23.96  | 35.57  | 41  | 11.47 | 9.94  | 8.02  | 11.48  |
| P09405 | Nucleolin                                                         | 542  | 8  | 188  | 921  | 0.4649 | 1.96   | 41  | 3.20   | 22.25  | 13.69  | 1.62   | 21  | 0.76  | 9.11  | 4.38  | 6.56   |
| Q99LC5 | Electron transfer flavoprotein subunit alpha, mitochondrial       | 808  | 10 | 403  | 653  | 0.3102 | -2.20  | 56  | 13.85  | 14.83  | 27.39  | 0.00   | 123 | 30.58 | 30.64 | 13.86 | 48.38  |
| Q8BFY9 | Transportin-1                                                     | 138  | 2  | 9    | 1548 | 0.9007 | 1.04   | 2   | 0.00   | 0.00   | 1.71   | 0.00   | 2   | 0.00  | 0.83  | 0.00  | 0.82   |
| P09103 | Protein disulfide-isomerase                                       | 581  | 8  | 118  | 590  | 0.3282 | -1.37  | 20  | 5.33   | 1.06   | 11.98  | 1.62   | 27  | 4.59  | 7.45  | 8.02  | 7.38   |
| P14733 | Lamin-B1                                                          | 651  | 9  | 83   | 33   | 0.0429 | 6.43   | 38  | 8.53   | 7.42   | 7.70   | 14.55  | 6   | 2.29  | 0.00  | 3.65  | 0.00   |
| P23242 | Gap junction alpha-1 protein                                      | 334  | 6  | 75   | 92   | 0.0113 | 25.58  | 26  | 2.13   | 11.66  | 8.56   | 3.23   | 0   | 0.00  | 0.00  | 0.00  | 0.00   |
| Q8R3B1 | 1-phosphatidylinositol-4,5-bisphosphate phosphodiesterase delta-1 | 189  | 3  | 6    | 1235 | 0.3910 | 4.26   | 4   | 4.26   | 0.00   | 0.00   | 0.00   | 0   | 0.00  | 0.00  | 0.00  | 0.00   |
| Q8VJ6  | Splicing factor, proline- and glutamine-rich                      | 358  | 6  | 128  | 784  | 0.2525 | -1.32  | 18  | 0.00   | 4.24   | 7.70   | 6.47   | 24  | 3.06  | 5.80  | 7.29  | 8.20   |
| Q6P9K8 | Caskin-1                                                          | 128  | 2  | 14   | 799  | 0.0782 | 4.05   | 4   | 2.13   | 1.06   | 0.86   | 0.00   | 0   | 0.00  | 0.00  | 0.00  | 0.00   |
| Q64516 | Glycerol kinase                                                   | 365  | 6  | 31   | 1473 | 0.7222 | 1.71   | 8   | 1.07   | 2.12   | 5.14   | 0.00   | 5   | 0.76  | 0.83  | 0.00  | 3.28   |
| Q8BMS1 | Trifunctional enzyme subunit alpha, mitochondrial                 | 1576 | 22 | 377  | 76   | 0.1170 | 2.25   | 119 | 17.05  | 24.37  | 52.21  | 25.87  | 53  | 11.47 | 10.77 | 8.75  | 22.14  |
| Q99MN9 | Propionyl-CoA carboxylase beta chain, mitochondrial               | 900  | 14 | 117  | 1014 | 0.5825 | 1.30   | 26  | 5.33   | 5.30   | 11.98  | 3.23   | 20  | 1.53  | 4.97  | 5.10  | 8.20   |
| Q99LB6 | Methionine adenosyltransferase 2 subunit beta                     | 306  | 4  | 60   | 956  | 0.2871 | -1.44  | 10  | 1.07   | 4.24   | 5.14   | 0.00   | 15  | 3.82  | 5.80  | 2.92  | 2.46   |
| P40240 | CD9 antigen                                                       | 305  | 4  | 255  | 59   | 0.0230 | 2.43   | 105 | 29.84  | 21.19  | 23.11  | 30.72  | 43  | 16.82 | 5.80  | 13.13 | 7.38   |
| Q9CR51 | V-type proton ATPase subunit G 1                                  | 203  | 3  | 44   | 1316 | 0.7936 | 1.06   | 14  | 6.39   | 3.18   | 0.00   | 4.85   | 14  | 3.82  | 5.80  | 0.73  | 3.28   |
| Q9QUR6 | Prolyl endopeptidase                                              | 513  | 8  | 98   | 1226 | 0.6700 | -1.10  | 26  | 8.53   | 3.18   | 9.41   | 4.85   | 29  | 13.00 | 4.14  | 6.56  | 4.92   |
| P68181 | cAMP-dependent protein kinase catalytic subunit beta              | 214  | 3  | 77   | 737  | 0.3850 | -1.22  | 15  | 1.07   | 5.30   | 8.56   | 0.00   | 18  | 3.82  | 7.45  | 3.65  | 3.28   |
| Q9QUP5 | Hyaluronan and proteoglycan link protein 1                        | 439  | 6  | 78   | 535  | 0.2194 | 6.29   | 19  | 5.33   | 9.54   | 4.28   | 0.00   | 3   | 0.76  | 0.00  | 1.46  | 0.82   |
| Q9JLN9 | Serine/threonine-protein kinase mTOR                              | 395  | 7  | 22   | 1123 | 0.2519 | -4.84  | 2   | 0.00   | 0.00   | 0.00   | 1.62   | 8   | 5.35  | 0.83  | 0.00  | 1.64   |
| Q9EST5 | Acidic leucine-rich nuclear phosphoprotein 32 family member B     | 135  | 2  | 42   | 1361 | 0.9769 | 1.35   | 11  | 5.33   | 1.06   | 4.28   | 0.00   | 8   | 0.76  | 1.66  | 2.19  | 3.28   |
| Q9CZX8 | 40S ribosomal protein S19                                         | 243  | 4  | 99   | 1212 | 0.7911 | 1.20   | 28  | 7.46   | 6.36   | 2.57   | 11.32  | 23  | 4.59  | 4.97  | 10.21 | 3.28   |
| Q9Z2D6 | Methyl-CpG-binding protein 2                                      | 267  | 4  | 29   | 600  | 0.1386 | 1.86   | 5   | 1.07   | 1.06   | 0.86   | 1.62   | 2   | 0.00  | 0.83  | 0.00  | 1.64   |
| P47962 | 60S ribosomal protein L5                                          | 283  | 4  | 91   | 832  | 0.3444 | -1.98  | 16  | 3.20   | 9.54   | 3.42   | 0.00   | 32  | 7.65  | 9.11  | 2.19  | 13.12  |
| Q6PB66 | Leucine-rich PPR motif-containing protein, mitochondrial          | 1494 | 23 | 189  | 619  | 0.1850 | 1.47   | 63  | 20.25  | 15.89  | 22.25  | 4.85   | 43  | 19.88 | 6.63  | 11.67 | 4.92   |
| P14824 | Annexin A6                                                        | 1446 | 21 | 462  | 29   | 0.0312 | 2.60   | 189 | 34.10  | 47.68  | 48.78  | 58.20  | 73  | 27.52 | 13.25 | 14.58 | 17.22  |
| Q5DTL9 | Sodium-driven chloride bicarbonate exchanger                      | 288  | 5  | 75   | 442  | 0.0442 | -2.41  | 7   | 3.20   | 0.00   | 1.71   | 1.62   | 16  | 4.59  | 1.66  | 2.92  | 6.56   |
| Q9EQ06 | Estradiol 17-beta-dehydrogenase 11                                | 137  | 2  | 27   | 1088 | 0.8232 | 1.93   | 9   | 4.26   | 0.00   | 0.00   | 4.85   | 5   | 1.53  | 0.83  | 0.73  | 1.64   |
| O88343 | Electrogenic sodium bicarbonate cotransporter 1                   | 479  | 7  | 377  | 686  | 0.4511 | 1.21   | 92  | 21.31  | 28.61  | 22.25  | 19.40  | 76  | 24.46 | 11.59 | 16.04 | 23.78  |
| O88531 | Palmitoyl-protein thioesterase 1                                  | 345  | 5  | 130  | 1364 | 0.6538 | -1.11  | 26  | 5.33   | 7.42   | 13.69  | 0.00   | 29  | 7.65  | 4.97  | 4.38  | 12.30  |
| Q9D0E1 | Heterogeneous nuclear ribonucleoprotein M                         | 542  | 9  | 101  | 1159 | 0.6006 | 1.14   | 25  | 8.53   | 3.18   | 3.42   | 9.70   | 22  | 7.65  | 1.66  | 5.83  | 6.56   |
| Q9DAK9 | 14 kDa phosphohistidine phosphatase                               | 321  | 5  | 109  | 1241 | 0.9163 | 1.27   | 38  | 13.85  | 7.42   | 1.71   | 14.55  | 30  | 4.59  | 9.94  | 10.21 | 4.92   |
| Q78ZA7 | Nucleosome assembly protein 1-like 4                              | 247  | 4  | 31   | 1330 | 0.6127 | -1.09  | 4   | 0.00   | 1.06   | 2.57   | 0.00   | 4   | 0.76  | 1.66  | 0.73  | 0.82   |
| Q9Z1F9 | SUMO-activating enzyme subunit 2                                  | 287  | 4  | 51   | 290  | 0.1637 | -3.54  | 5   | 0.00   | 0.00   | 5.14   | 0.00   | 18  | 6.12  | 2.48  | 2.19  | 7.38   |
| P43274 | Histone H1.4                                                      | 191  | 3  | 172  | 434  | 0.0696 | 2.88   | 65  | 8.53   | 12.72  | 7.70   | 35.57  | 22  | 3.82  | 9.94  | 2.92  | 5.74   |
| Q810U4 | Neuronal cell adhesion molecule                                   | 566  | 9  | 236  | 318  | 0.2587 | 1.58   | 79  | 26.64  | 18.01  | 21.40  | 12.93  | 50  | 4.59  | 17.39 | 18.23 | 9.84   |
| Q99LF4 | UPF0027 protein C22orf28 homolog                                  | 500  | 8  | 70   | 142  | 0.1692 | -2.26  | 7   | 0.00   | 1.06   | 4.28   | 1.62   | 16  | 4.59  | 3.31  | 2.92  | 4.92   |
| O70161 | Phosphatidylinositol-4-phosphate 5-kinase type-1 gamma            | 313  | 5  | 99   | 1402 | 0.9554 | -1.01  | 32  | 7.46   | 3.18   | 11.98  | 9.70   | 33  | 3.06  | 5.80  | 12.40 | 11.48  |
| P01942 | Hemoglobin subunit alpha                                          | 382  | 5  | 1675 | 43   | 0.0690 | 1.78   | 662 | 181.16 | 166.36 | 106.12 | 208.56 | 373 | 92.51 | 54.66 | 96.99 | 128.75 |
| Q9CR00 | 26S proteasome non-ATPase regulatory subunit 9                    | 136  | 2  | 16   | 1477 | 0.7098 | -1.62  | 2   | 1.07   | 0.00   | 0.86   | 0.00   | 3   | 2.29  | 0.83  | 0.00  | 0.00   |
| Q8BGQ7 | Alanyl-tRNA synthetase, cytoplasmic                               | 1178 | 18 | 244  | 862  | 0.3190 | -1.74  | 47  | 15.99  | 7.42   | 23.96  | 0.00   | 82  | 16.82 | 14.91 | 20.42 | 30.34  |
| Q9D9V3 | Enoyl-CoA hydratase domain-containing protein 1                   | 211  | 3  | 28   | 233  | 0.1210 | -6.04  | 2   | 2.13   | 0.00   | 0.00   | 0.00   | 13  | 3.82  | 3.31  | 0.00  | 5.74   |
| Q62186 | Translocon-associated protein subunit delta                       | 278  | 4  | 69   | 1316 | 0.8603 | 1.38   | 23  | 11.72  | 1.06   | 3.42   | 6.47   | 16  | 2.29  | 4.97  | 5.83  | 3.28   |
| Q9JJZ2 | Tubulin alpha-8 chain                                             | 107  | 2  | 9    | 1529 | 0.8448 | 1.28   | 2   | 0.00   | 1.06   | 0.86   | 0.00   | 1   | 0.76  | 0.00  | 0.73  | 0.00   |
| Q61166 | Microtubule-associated protein RP/EB family member 1              | 255  | 4  | 58   | 1078 | 0.6161 | -1.66  | 11  | 5.33   | 0.00   | 4.28   | 1.62   | 19  | 3.06  | 9.11  | 0.73  | 5.74   |
| Q6P5F9 | Exportin-1                                                        | 678  | 11 | 94   | 1063 | 0.5991 | -1.02  | 26  | 3.20   | 5.30   | 17.12  | 0.00   | 26  | 3.82  | 5.80  | 5.83  | 10.66  |
| P45376 | Aldose reductase                                                  | 244  | 4  | 119  | 909  | 0.4788 | -1.10  | 28  | 4.26   | 15.89  | 7.70   | 0.00   | 31  | 6.12  | 8.28  | 8.02  | 8.20   |
| Q8BXV2 | BR13-binding protein                                              | 137  | 2  | 42   | 13   | 0.0076 | 9.92   | 24  | 5.33   | 4.24   | 6.85   | 8.08   | 2   | 0.00  | 0.83  | 0.00  | 1.64   |
| Q8BFZ9 | Erlin-2                                                           | 100  | 2  | 14   | 1310 | 0.1824 | -1.56  | 0   | 0.00   | 0.00   | 0.00   | 0.00   | 2   | 0.00  | 0.83  | 0.73  | 0.00   |
| Q9DB15 | 39S ribosomal protein L12, mitochondrial                          | 130  | 2  | 33   | 192  | 0.0037 | 2.53   | 18  | 3.20   | 7.42   | 4.28   | 3.23   | 7   | 0.76  | 3.31  | 1.46  | 1.64   |
| Q99KK7 | Dipeptidyl peptidase 3                                            | 709  | 11 | 110  | 538  | 0.3090 | 2.27   | 36  | 9.59   | 3.18   | 17.12  | 6.47   | 16  | 3.06  | 4.97  | 1.46  | 6.56   |
| Q9D154 | Leukocyte elastase inhibitor A                                    | 356  | 5  | 62   | 628  | 0.2064 | -21.69 | 1   | 0.00   | 0.00   | 0.86   | 0.00   | 19  | 4.59  | 13.25 | 0.73  | 0.00   |
| P68372 | Tubulin beta-2C chain                                             | 140  | 2  | 195  | 693  | 0.3610 | -1.24  | 31  | 17.05  | 0.00   | 13.69  | 0.00   | 38  | 6.12  | 6.63  | 12.40 | 13.12  |
| Q80TL0 | Protein phosphatase 1E                                            | 225  | 4  | 27   | 130  | 0.1422 | -2.90  | 4   | 0.00   | 2.12   | 1.71   | 0.00   | 11  | 3.06  | 3.31  | 1.46  | 3.28   |
| O70443 | Guanine nucleotide-binding protein G(z) subunit alpha             | 474  | 7  | 119  | 583  | 0.3190 | -1.98  | 19  | 6.39   | 6.36   | 5.99   | 0.00   | 37  | 11.47 | 6.63  | 5.10  | 13.94  |
| Q9ESM3 | Hyaluronan and proteoglycan link protein 2                        | 231  | 4  | 33   | 1355 | 0.4673 | -2.22  | 1   | 0.00   | 1.06   | 0.00   | 0.00   | 2   | 1.53  | 0.83  | 0.00  | 0.00   |
| Q9ER00 | Syntaxin-12                                                       | 322  | 5  | 74   | 1334 | 0.9081 | -1.10  | 16  | 7.46   | 1.06   | 2.57   | 4.85   | 17  | 0.76  | 5.80  | 4.38  | 6.56   |
| Q9DCN2 | NADH-cytochrome b5 reductase 3                                    | 696  | 11 | 260  | 273  | 0.0404 | 2.11   | 78  | 25.58  | 23.31  | 12.84  | 16.17  | 37  | 6.88  | 16.56 | 3.65  | 9.84   |
| Q80UG5 | Septin-9                                                          | 168  | 3  | 22   | 796  | 0.0778 | 4.04   | 4   | 1.07   | 2.12   | 0.86   | 0.00   | 0   | 0.00  | 0.00  | 0.00  | 0.00   |
| Q8K406 | Leucine-rich repeat LG1 family member 3                           | 360  | 6  | 19   | 1138 | 0.2176 | -3.29  | 0   | 0.00   | 0.00   | 0.00   | 0.00   | 3   | 0.00  | 0.83  | 0.00  | 2.46   |
| Q3JUJ9 | Regulator of microtubule dynamics protein 3                       | 129  | 2  | 4    | 1564 | ?      | 0.00   | 0   | 0.00   | 0.00   | 0.00   | 0.00   | 0   | 0.00  | 0.00  | 0.00  | 0.00   |
| Q60737 | Casein kinase II subunit alpha                                    | 395  | 7  | 78   | 480  | 0.0948 | -2.77  | 9   | 1.07   | 4.24   | 3.42   | 0.00   | 24  | 0.76  | 11.59 | 10.21 | 1.64   |
| Q8R2R9 | AP-3 complex subunit mu-2                                         | 171  | 3  | 6    | 1524 | 0.3910 | -0.82  | 0   | 0.00   | 0.00   | 0.00   | 0.00   | 1   | 0.00  | 0.00  | 0.00  | 0.82   |
| Q8BUV3 | Gephyrin                                                          | 566  | 9  | 61   | 1150 | 0.7321 | -1.26  | 10  | 1.07   | 1.06   | 4.28   | 3.23   | 12  | 1.53  | 0.00  | 0.73  | 9.84   |
| Q62443 | Neuronal pentraxin-1                                              | 173  | 3  | 27   | 39   | 0.0556 | 5.31   | 12  | 3.20   | 4.24   | 2.57   | 1.62   | 2   | 0.00  | 0.00  | 2.19  | 0.00   |
| P28271 | Cytoplasmic aconitate hydratase                                   | 564  | 9  | 151  | 1343 | 0.7923 | 1.25   | 39  | 0.00   | 7.42   | 22.25  | 9.70   | 31  | 7.65  | 4.14  | 6.56  | 13.12  |
| P23492 | Purine nucleoside phosphorylase                                   | 531  | 8  | 182  | 146  | 0.0616 | 1.96   | 60  | 17.05  | 12.72  | 14.55  | 16.17  | 31  | 4.59  | 11.59 | 7.29  | 7.38   |
| P11352 | Glutathione peroxidase 1                                          | 436  | 6  | 183  | 1160 | 0.9036 | -1.00  | 51  | 13.85  | 5.30   | 18.83  | 12.93  | 51  | 6.88  | 13.25 | 15.31 | 15.58  |
| Q9CQU0 | Thioredoxin domain-containing protein 12                          | 153  | 3  | 34   | 1321 | 0.7051 | -1.15  | 7   | 2.13   | 1.06   | 2.57   | 1.62   | 8   | 3.06  | 1.66  | 2.92  | 0.82   |
| Q9DBE8 | Alpha-1,3-mannosyltransferase ALG2                                | 379  | 6  | 38   |      |        |        |     |        |        |        |        |     |       |       |       |        |

|        |                                                                  |      |    |     |      |        |        |     |       |       |       |        |     |       |       |       |       |
|--------|------------------------------------------------------------------|------|----|-----|------|--------|--------|-----|-------|-------|-------|--------|-----|-------|-------|-------|-------|
| P14869 | 60S acidic ribosomal protein P0                                  | 603  | 8  | 308 | 550  | 0.3601 | -1.81  | 55  | 14.92 | 14.83 | 24.82 | 0.00   | 99  | 12.23 | 30.64 | 19.69 | 36.08 |
| Q80TL4 | Protein KIAA1045                                                 | 231  | 3  | 33  | 544  | 0.0767 | -4.56  | 3   | 0.00  | 2.12  | 0.86  | 0.00   | 14  | 0.00  | 9.11  | 3.65  | 0.82  |
| Q6ZP3  | Ubiquitin-conjugating enzyme E2 O                                | 384  | 6  | 83  | 685  | 0.3017 | -1.58  | 20  | 8.53  | 1.06  | 5.14  | 4.85   | 31  | 6.12  | 9.11  | 5.83  | 9.84  |
| P55264 | Adenosine kinase                                                 | 175  | 2  | 51  | 467  | 0.1651 | -5.96  | 3   | 0.00  | 1.06  | 1.71  | 0.00   | 17  | 6.88  | 7.45  | 2.19  | 0.00  |
| Q5SRX1 | TOM1-like protein 2                                              | 259  | 4  | 266 | 1071 | 0.7530 | 1.39   | 69  | 30.90 | 11.66 | 21.40 | 4.85   | 49  | 6.12  | 17.39 | 9.48  | 16.40 |
| P47911 | 60S ribosomal protein L6                                         | 132  | 2  | 23  | 1421 | 0.3910 | -1.56  | 1   | 0.00  | 1.06  | 0.00  | 0.00   | 2   | 0.00  | 1.66  | 0.00  | 0.00  |
| Q8BMF3 | NADP-dependent malic enzyme, mitochondrial                       | 203  | 3  | 42  | 1047 | 0.7396 | 1.11   | 13  | 1.07  | 8.48  | 3.42  | 0.00   | 12  | 2.29  | 1.66  | 3.65  | 4.10  |
| Q9QXV0 | ProSAAS                                                          | 510  | 7  | 496 | 276  | 0.1568 | 1.44   | 148 | 27.71 | 33.91 | 34.23 | 51.74  | 103 | 27.52 | 28.16 | 24.79 | 22.14 |
| Q61941 | NAD(P) transhydrogenase, mitochondrial                           | 347  | 4  | 57  | 754  | 0.3999 | 3.48   | 22  | 7.46  | 2.12  | 11.98 | 0.00   | 6   | 0.00  | 0.00  | 2.92  | 3.28  |
| P62320 | Small nuclear ribonucleoprotein Sm D3                            | 214  | 3  | 107 | 1410 | 0.6153 | 1.02   | 36  | 3.20  | 7.42  | 5.99  | 19.40  | 35  | 6.88  | 6.63  | 8.75  | 13.12 |
| P47753 | F-actin-capping protein subunit alpha-1                          | 220  | 4  | 40  | 1434 | 0.4675 | -1.33  | 7   | 1.07  | 2.12  | 3.42  | 0.00   | 9   | 1.53  | 4.14  | 1.46  | 1.64  |
| P24288 | Branched-chain-amino-acid aminotransferase, cytosolic            | 256  | 4  | 31  | 532  | 0.1030 | -10.44 | 0   | 0.00  | 0.00  | 0.00  | 0.00   | 10  | 3.82  | 5.80  | 0.00  | 0.82  |
| Q8K212 | Phosphofurin acidic cluster sorting protein 1                    | 198  | 3  | 23  | 200  | 0.0706 | 4.46   | 11  | 2.13  | 4.24  | 4.28  | 0.00   | 2   | 0.00  | 1.66  | 0.73  | 0.00  |
| Q8R5C5 | Beta-centractin                                                  | 206  | 3  | 120 | 1320 | 0.5164 | -1.11  | 27  | 6.39  | 13.78 | 6.85  | 0.00   | 30  | 4.59  | 9.11  | 14.58 | 1.64  |
| Q9D8W5 | 26S proteasome non-ATPase regulatory subunit 12                  | 366  | 6  | 29  | 812  | 0.2039 | -2.42  | 4   | 2.13  | 0.00  | 1.71  | 0.00   | 9   | 3.06  | 3.31  | 2.92  | 0.00  |
| O70591 | Prefoldin subunit 2                                              | 290  | 4  | 84  | 1018 | 0.5262 | 1.27   | 29  | 5.33  | 3.18  | 5.99  | 14.55  | 23  | 3.82  | 4.97  | 5.10  | 9.02  |
| O54774 | AP-3 complex subunit delta-1                                     | 747  | 13 | 151 | 1326 | 0.9063 | 1.41   | 39  | 7.46  | 16.95 | 14.55 | 0.00   | 28  | 3.06  | 14.08 | 1.46  | 9.02  |
| Q9WVC2 | Ly-6/neurotoxin-like protein 1                                   | 175  | 3  | 32  | 6    | 0.0180 | -6.26  | 2   | 2.13  | 0.00  | 0.00  | 0.00   | 13  | 3.82  | 3.31  | 2.92  | 3.28  |
| P48678 | Lamin-A/C                                                        | 960  | 14 | 165 | 186  | 0.0303 | 3.29   | 54  | 9.59  | 16.95 | 12.84 | 14.55  | 16  | 0.76  | 2.48  | 6.56  | 6.56  |
| Q60676 | Serine/threonine-protein phosphatase 5                           | 333  | 5  | 76  | 615  | 0.3816 | -1.39  | 15  | 2.13  | 2.12  | 9.41  | 1.62   | 21  | 6.12  | 4.97  | 3.65  | 6.56  |
| Q9JIF0 | Protein arginine N-methyltransferase 1                           | 241  | 4  | 25  | 903  | 0.0820 | -7.54  | 1   | 0.00  | 1.06  | 0.00  | 0.00   | 8   | 2.29  | 4.97  | 0.73  | 0.00  |
| Q3UYC0 | Protein phosphatase 1H                                           | 191  | 3  | 69  | 920  | 0.5002 | -1.10  | 18  | 9.59  | 1.06  | 7.70  | 0.00   | 20  | 4.59  | 2.48  | 6.56  | 6.56  |
| P14148 | 60S ribosomal protein L7                                         | 386  | 6  | 141 | 1066 | 0.4759 | 1.16   | 32  | 7.46  | 12.72 | 5.14  | 6.47   | 27  | 5.35  | 8.28  | 2.19  | 11.48 |
| P11031 | Activated RNA polymerase II transcriptional coactivator p15      | 344  | 6  | 123 | 970  | 0.4494 | 1.27   | 40  | 8.53  | 12.72 | 7.70  | 11.32  | 32  | 13.00 | 8.28  | 8.02  | 2.46  |
| Q8CGK3 | Lon protease homolog, mitochondrial                              | 514  | 8  | 91  | 209  | 0.1486 | -2.11  | 16  | 2.13  | 5.30  | 8.56  | 0.00   | 34  | 7.65  | 9.94  | 8.02  | 8.20  |
| P70398 | Probable ubiquitin carboxyl-terminal hydrolase FAF-X             | 1245 | 20 | 236 | 1127 | 0.9818 | 1.06   | 76  | 22.38 | 6.36  | 28.24 | 19.40  | 72  | 22.94 | 23.19 | 16.04 | 9.84  |
| O70318 | Band 4.1-like protein 2                                          | 294  | 5  | 129 | 1347 | 0.9355 | -1.09  | 32  | 7.46  | 7.42  | 10.27 | 6.47   | 34  | 16.06 | 4.14  | 5.10  | 9.02  |
| Q99LD8 | N(G),N(G)-dimethylarginine dimethylaminohydrolase 2              | 178  | 3  | 71  | 721  | 0.4985 | 1.95   | 20  | 8.53  | 1.06  | 2.57  | 8.08   | 10  | 2.29  | 4.97  | 1.46  | 1.64  |
| Q9D059 | Histidine triad nucleotide-binding protein 2, mitochondrial      | 282  | 4  | 164 | 336  | 0.1426 | 1.53   | 61  | 19.18 | 13.78 | 11.98 | 16.17  | 40  | 9.94  | 4.14  | 10.21 | 15.58 |
| O70325 | Phospholipid hydroperoxide glutathione peroxidase, mitochondrial | 106  | 2  | 45  | 1249 | 0.9643 | 1.03   | 11  | 4.26  | 2.12  | 1.71  | 3.23   | 11  | 3.82  | 2.48  | 2.19  | 2.46  |
| P21278 | Guanine nucleotide-binding protein subunit alpha-11              | 111  | 2  | 14  | 363  | 0.0277 | -2.41  | 2   | 1.07  | 0.00  | 0.86  | 0.00   | 5   | 1.53  | 0.83  | 1.46  | 0.82  |
| P52760 | Ribonuclease UK114                                               | 574  | 8  | 487 | 964  | 0.4625 | -1.14  | 109 | 53.28 | 26.49 | 8.56  | 21.02  | 125 | 39.76 | 23.19 | 32.09 | 29.52 |
| Q91WK5 | Glycine cleavage system H protein, mitochondrial                 | 313  | 5  | 117 | 1176 | 0.8587 | 1.06   | 43  | 17.05 | 10.60 | 5.99  | 9.70   | 41  | 13.76 | 9.94  | 12.40 | 4.92  |
| P54071 | Isocitrate dehydrogenase [NADP], mitochondrial                   | 481  | 7  | 124 | 1064 | 0.3383 | -1.33  | 19  | 5.33  | 4.24  | 9.41  | 0.00   | 25  | 4.59  | 8.28  | 12.40 | 0.00  |
| P47738 | Aldehyde dehydrogenase, mitochondrial                            | 956  | 15 | 389 | 974  | 0.7370 | 1.06   | 94  | 26.64 | 15.89 | 27.39 | 24.25  | 89  | 19.88 | 27.33 | 29.90 | 11.48 |
| Q00P9  | Heterogeneous nuclear ribonucleoprotein U-like protein 2         | 247  | 3  | 64  | 426  | 0.3276 | -1.72  | 11  | 0.00  | 6.36  | 4.28  | 0.00   | 18  | 4.59  | 4.97  | 2.19  | 6.56  |
| P62141 | Serine/threonine-protein phosphatase PP1-beta catalytic subunit  | 332  | 5  | 83  | 539  | 0.1511 | -2.90  | 11  | 5.33  | 5.30  | 0.86  | 0.00   | 33  | 3.82  | 11.59 | 8.02  | 9.84  |
| Q61543 | Golgi apparatus protein 1                                        | 274  | 5  | 24  | 318  | 0.0598 | 9.20   | 14  | 7.46  | 3.18  | 3.42  | 0.00   | 2   | 1.53  | 0.00  | 0.00  | 0.00  |
| Q9Z0E0 | Neurochondrin                                                    | 1441 | 20 | 731 | 116  | 0.1118 | 1.53   | 255 | 46.89 | 57.22 | 65.04 | 85.69  | 166 | 46.64 | 41.41 | 43.03 | 35.26 |
| P10518 | Delta-aminolevulinic acid dehydratase                            | 646  | 9  | 211 | 1174 | 0.4327 | -1.30  | 49  | 5.33  | 24.37 | 19.68 | 0.00   | 64  | 19.11 | 15.74 | 9.48  | 19.68 |
| Q8CDN6 | Thioredoxin-like protein 1                                       | 703  | 10 | 230 | 865  | 0.4937 | -1.31  | 52  | 15.99 | 18.01 | 17.97 | 0.00   | 68  | 12.23 | 14.91 | 15.31 | 25.42 |
| Q3THK7 | GMP synthase [glutamine-hydrolyzing]                             | 322  | 5  | 54  | 1283 | 0.6001 | -1.23  | 10  | 1.07  | 4.24  | 4.28  | 0.00   | 12  | 2.29  | 1.66  | 2.92  | 4.92  |
| P29341 | Polyadenylate-binding protein 1                                  | 302  | 5  | 48  | 1385 | 0.9186 | -1.25  | 12  | 3.20  | 1.06  | 4.28  | 3.23   | 15  | 9.17  | 2.48  | 1.46  | 1.64  |
| Q99KE1 | NAD-dependent malic enzyme, mitochondrial                        | 192  | 3  | 40  | 596  | 0.2348 | 3.43   | 16  | 3.20  | 7.42  | 5.14  | 0.00   | 5   | 4.59  | 0.00  | 0.00  | 0.00  |
| Q9DC16 | Endoplasmic reticulum-Golgi intermediate compartment protein 1   | 198  | 3  | 13  | 912  | 0.2866 | -2.17  | 1   | 1.07  | 0.00  | 0.00  | 0.00   | 2   | 0.76  | 0.00  | 0.73  | 0.82  |
| O55023 | Inositol monophosphatase 1                                       | 474  | 7  | 222 | 1061 | 0.8113 | 1.04   | 60  | 19.18 | 16.95 | 9.41  | 14.55  | 58  | 14.53 | 14.91 | 10.21 | 18.04 |
| Q9D0L7 | Armadillo repeat-containing protein 10                           | 176  | 3  | 9   | 1057 | 0.1817 | 4.25   | 4   | 2.13  | 2.12  | 0.00  | 0.00   | 0   | 0.00  | 0.00  | 0.00  | 0.00  |
| Q8R4N0 | Citrate lyase subunit beta-like protein, mitochondrial           | 310  | 5  | 52  | 419  | 0.1809 | -2.17  | 8   | 2.13  | 3.18  | 2.57  | 0.00   | 17  | 7.65  | 2.48  | 3.65  | 3.28  |
| Q9JKR6 | Hypoxia up-regulated protein 1                                   | 648  | 10 | 205 | 425  | 0.1397 | 1.90   | 86  | 20.25 | 25.43 | 18.83 | 21.02  | 45  | 16.06 | 5.80  | 18.96 | 4.10  |
| P57776 | Elongation factor 1-delta                                        | 305  | 4  | 111 | 1265 | 0.7052 | -1.07  | 26  | 8.53  | 9.54  | 5.99  | 1.62   | 28  | 3.82  | 9.94  | 8.02  | 5.74  |
| P38647 | Stress-70 protein, mitochondrial                                 | 1761 | 25 | 990 | 91   | 0.1639 | 1.80   | 367 | 66.07 | 71.00 | 83.02 | 147.12 | 204 | 58.87 | 53.00 | 57.61 | 34.44 |
| P20029 | 78 kDa glucose-regulated protein                                 | 1250 | 19 | 619 | 93   | 0.1321 | 2.01   | 243 | 45.82 | 57.22 | 49.64 | 90.54  | 121 | 38.99 | 20.70 | 43.03 | 18.04 |
| Q9CR57 | 60S ribosomal protein L14                                        | 304  | 4  | 101 | 246  | 0.1124 | 1.65   | 33  | 7.46  | 12.72 | 6.85  | 6.47   | 20  | 2.29  | 6.63  | 7.29  | 4.10  |
| Q9WVJ2 | 26S proteasome non-ATPase regulatory subunit 13                  | 255  | 4  | 49  | 1031 | 0.4262 | -1.54  | 7   | 2.13  | 1.06  | 3.42  | 0.00   | 10  | 0.76  | 4.14  | 3.65  | 1.64  |
| Q00915 | Retinol-binding protein 1                                        | 310  | 5  | 84  | 691  | 0.4955 | 1.41   | 35  | 5.33  | 11.66 | 5.14  | 12.93  | 25  | 7.65  | 4.97  | 7.29  | 4.92  |
| P46664 | Adenylosuccinate synthetase isozyme 2                            | 284  | 4  | 45  | 15   | 0.0449 | -5.40  | 3   | 0.00  | 1.06  | 1.71  | 0.00   | 15  | 3.82  | 3.31  | 2.92  | 4.92  |
| P55066 | Neurocan core protein                                            | 466  | 7  | 251 | 70   | 0.0010 | 2.00   | 91  | 22.38 | 13.78 | 17.97 | 37.18  | 46  | 10.70 | 5.80  | 10.21 | 18.86 |
| Q99020 | Heterogeneous nuclear ribonucleoprotein A/B                      | 123  | 2  | 65  | 147  | 0.0044 | -3.54  | 5   | 1.07  | 2.12  | 1.71  | 0.00   | 17  | 4.59  | 7.45  | 3.65  | 1.64  |
| Q9D115 | Methylmalonyl-CoA epimerase, mitochondrial                       | 139  | 2  | 55  | 1464 | 0.8061 | 1.01   | 18  | 3.20  | 1.06  | 4.28  | 9.70   | 18  | 6.88  | 4.97  | 2.92  | 3.28  |
| P21619 | Lamin-B2                                                         | 732  | 12 | 165 | 27   | 0.0019 | 3.92   | 64  | 11.72 | 10.60 | 14.55 | 27.48  | 16  | 3.82  | 1.66  | 4.38  | 6.56  |
| O88342 | WD repeat-containing protein 1                                   | 888  | 13 | 506 | 154  | 0.1107 | 1.60   | 177 | 41.56 | 38.15 | 43.65 | 53.35  | 110 | 27.52 | 39.75 | 24.07 | 18.86 |
| Q91ZA3 | Propionyl-CoA carboxylase alpha chain, mitochondrial             | 578  | 9  | 54  | 977  | 0.9152 | 1.32   | 11  | 4.26  | 6.36  | 0.86  | 0.00   | 9   | 2.29  | 1.66  | 1.46  | 3.28  |
| Q62318 | Transcription intermediary factor 1-beta                         | 357  | 6  | 47  | 1177 | 0.8982 | 1.35   | 11  | 2.13  | 4.24  | 4.28  | 0.00   | 8   | 2.29  | 0.83  | 1.46  | 3.28  |
| P10852 | 4F2 cell-surface antigen heavy chain                             | 562  | 9  | 355 | 48   | 0.0265 | 1.95   | 125 | 23.44 | 30.73 | 35.09 | 35.57  | 64  | 11.47 | 12.42 | 27.71 | 12.30 |
| Q99KK2 | N-acetylneuraminase cytidylyltransferase                         | 192  | 3  | 18  | 1550 | 0.9889 | 1.03   | 1   | 0.00  | 0.00  | 0.86  | 0.00   | 1   | 0.00  | 0.83  | 0.00  | 0.00  |
| Q9CWS0 | N(G),N(G)-dimethylarginine dimethylaminohydrolase 1              | 754  | 12 | 273 | 464  | 0.2492 | -2.34  | 41  | 10.66 | 13.78 | 16.26 | 0.00   | 95  | 20.64 | 24.02 | 15.31 | 35.26 |
| P28660 | Nck-associated protein 1                                         | 1253 | 19 | 439 | 994  | 0.7144 | 1.00   | 124 | 29.84 | 24.37 | 42.79 | 27.48  | 124 | 34.40 | 13.25 | 45.94 | 30.34 |
| Q9J16  | Alcohol dehydrogenase [NADP+]                                    | 545  | 8  | 279 | 1113 | 0.5543 | -1.05  | 69  | 17.05 | 29.67 | 22.25 | 0.00   | 73  | 13.76 | 21.53 | 15.31 | 22.14 |
| P42208 | Septin-2                                                         | 816  | 12 | 199 | 974  | 0.2814 | -1.39  | 28  | 3.20  | 12.72 | 11.98 | 0.00   | 39  | 9.94  | 20.70 | 7.29  | 0.82  |
| Q8CAA7 | Glucose 1,6-bisphosphate synthase                                | 549  | 9  | 151 | 252  | 0.1302 | 1.68   | 61  | 13.85 | 18.01 | 11.13 | 17.78  | 36  | 12.23 | 13.25 | 6.56  | 4.10  |
| Q8K0S0 | Phytanoyl-CoA hydroxylase-interacting protein                    | 325  | 5  | 133 | 527  | 0.1760 | -3.54  | 15  | 4.26  | 7.42  | 3.42  | 0.00   | 53  | 13.00 | 10.77 | 5.10  | 24.60 |
| Q8BIJ6 | Isoleucyl-tRNA synthetase, mitochondrial                         | 422  | 7  | 105 | 996  | 0.5353 | -1.31  | 19  | 7.46  | 6.36  | 5.14  | 0.00   | 25  | 8.41  | 2.48  | 6.56  | 7.38  |
| Q3U1J4 | DNA damage-binding protein 1                                     | 364  | 6  | 85  | 461  | 0.0181 | 2.06   | 27  | 12.79 | 5.30  | 5.99  | 3.23   | 13  | 7.65  | 2.48  | 1.46  | 1.64  |
| Q8OUW2 | F-box only protein 2                                             | 582  | 8  | 152 | 185  | 0.0129 | -      |     |       |       |       |        |     |       |       |       |       |

|        |                                                                        |      |    |      |      |        |       |      |        |        |        |        |      |        |        |        |        |
|--------|------------------------------------------------------------------------|------|----|------|------|--------|-------|------|--------|--------|--------|--------|------|--------|--------|--------|--------|
| P80316 | T-complex protein 1 subunit epsilon                                    | 635  | 10 | 184  | 555  | 0.3098 | 1.43  | 64   | 9.59   | 19.07  | 16.26  | 19.40  | 45   | 15.29  | 9.94   | 5.83   | 13.94  |
| Q9QZM0 | Ubiquitin-2                                                            | 179  | 3  | 77   | 257  | 0.0308 | 2.16  | 33   | 8.53   | 11.66  | 4.28   | 8.08   | 15   | 4.59   | 6.63   | 2.19   | 1.64   |
| P22892 | AP-1 complex subunit gamma-1                                           | 534  | 8  | 59   | 615  | 0.3033 | -1.75 | 9    | 0.00   | 1.06   | 5.99   | 1.62   | 15   | 2.29   | 3.31   | 2.19   | 7.38   |
| Q9ZIN5 | Spliceosome RNA helicase Bat1                                          | 218  | 3  | 77   | 524  | 0.0967 | -2.34 | 12   | 2.13   | 4.24   | 5.14   | 0.00   | 27   | 6.88   | 12.42  | 4.38   | 3.28   |
| Q8R081 | Heterogeneous nuclear ribonucleoprotein L                              | 593  | 9  | 226  | 68   | 0.0097 | 2.12  | 80   | 24.51  | 27.55  | 17.97  | 9.70   | 38   | 12.23  | 11.59  | 7.29   | 6.56   |
| Q71LX4 | Talin-2                                                                | 1612 | 25 | 341  | 156  | 0.0535 | -1.54 | 83   | 33.04  | 19.07  | 19.68  | 11.32  | 128  | 35.17  | 32.30  | 42.30  | 18.04  |
| Q60625 | Intercellular adhesion molecule 5                                      | 223  | 3  | 76   | 170  | 0.0637 | 1.85  | 35   | 9.59   | 8.48   | 8.56   | 8.08   | 19   | 3.82   | 2.48   | 5.10   | 7.38   |
| Q8CAY6 | Acetyl-CoA acetyltransferase, cytosolic                                | 406  | 6  | 158  | 981  | 0.2568 | -1.34 | 28   | 4.26   | 13.78  | 10.27  | 0.00   | 38   | 4.59   | 21.53  | 9.48   | 2.46   |
| Q8VDM4 | 26S proteasome non-ATPase regulatory subunit 2                         | 370  | 6  | 106  | 999  | 0.2916 | -1.37 | 26   | 0.00   | 2.12   | 13.69  | 9.70   | 35   | 5.35   | 5.80   | 7.29   | 16.40  |
| Q04690 | Neurofibromin                                                          | 389  | 6  | 49   | 1268 | 0.5328 | 1.21  | 15   | 5.33   | 2.12   | 2.57   | 4.85   | 12   | 6.88   | 2.48   | 2.92   | 0.00   |
| Q9JHU9 | Inositol-3-phosphate synthase 1                                        | 287  | 4  | 22   | 1450 | 0.7321 | -2.03 | 3    | 0.00   | 0.00   | 3.42   | 0.00   | 7    | 6.12   | 0.00   | 0.00   | 0.82   |
| Q64674 | Spermidine synthase                                                    | 292  | 5  | 46   | 476  | 0.1134 | -3.17 | 6    | 3.20   | 1.06   | 1.71   | 0.00   | 19   | 8.41   | 4.14   | 1.46   | 4.92   |
| O35643 | AP-1 complex subunit beta-1                                            | 989  | 16 | 271  | 870  | 0.3226 | -1.68 | 50   | 5.33   | 18.01  | 24.82  | 1.62   | 84   | 16.82  | 16.56  | 16.77  | 33.62  |
| P34884 | Macrophage migration inhibitory factor                                 | 289  | 4  | 231  | 1303 | 0.6995 | 1.02  | 44   | 28.77  | 2.12   | 3.42   | 9.70   | 43   | 6.88   | 7.45   | 20.42  | 8.20   |
| P35505 | Fumarylacetoacetase                                                    | 455  | 8  | 44   | 514  | 0.2013 | -5.76 | 2    | 1.07   | 0.00   | 0.86   | 0.00   | 11   | 1.53   | 6.63   | 2.92   | 0.00   |
| P08113 | Endoplasmic                                                            | 1159 | 18 | 423  | 1051 | 0.4864 | -1.08 | 103  | 1.07   | 24.37  | 29.10  | 48.50  | 111  | 20.64  | 19.05  | 28.44  | 42.64  |
| P34022 | Ran-specific GTPase-activating protein                                 | 320  | 5  | 88   | 1110 | 0.8105 | -1.09 | 23   | 6.39   | 3.18   | 5.14   | 8.08   | 25   | 7.65   | 7.45   | 6.56   | 3.28   |
| Q8BGN3 | Ectonucleotide pyrophosphatase/phosphodiesterase family member 6       | 189  | 3  | 17   | 1554 | ?      | 0.00  | 0    | 0.00   | 0.00   | 0.00   | 0.00   | 0    | 0.00   | 0.00   | 0.00   | 0.00   |
| Q9D0F9 | Phosphoglucomutase-1                                                   | 1022 | 15 | 420  | 1082 | 0.9167 | -1.07 | 101  | 24.51  | 20.13  | 33.38  | 22.63  | 108  | 43.58  | 19.88  | 18.23  | 26.24  |
| P57780 | Alpha-actinin-4                                                        | 886  | 13 | 261  | 1284 | 0.5218 | -1.18 | 50   | 3.20   | 19.07  | 25.68  | 1.62   | 58   | 12.23  | 9.11   | 13.13  | 23.78  |
| Q6ZQ38 | Cullin-associated NEDD8-dissociated protein 1                          | 1815 | 27 | 769  | 1016 | 0.9076 | -1.02 | 203  | 53.28  | 49.80  | 54.77  | 45.27  | 207  | 70.34  | 48.03  | 56.88  | 31.98  |
| Q9QUH0 | Glutaredoxin-1                                                         | 310  | 5  | 51   | 1537 | 0.8362 | -1.17 | 3    | 3.20   | 0.00   | 0.00   | 0.00   | 4    | 0.00   | 0.83   | 2.92   | 0.00   |
| Q62048 | Astrocytic phosphoprotein PEA-15                                       | 340  | 5  | 308  | 622  | 0.4415 | 1.29  | 111  | 27.71  | 28.61  | 15.41  | 38.80  | 86   | 16.06  | 18.22  | 26.25  | 25.42  |
| Q99JB2 | Stomatin-like protein 2                                                | 340  | 5  | 46   | 1468 | 0.8263 | 1.15  | 13   | 0.00   | 9.54   | 3.42   | 0.00   | 11   | 0.76   | 1.66   | 1.46   | 7.38   |
| P80315 | T-complex protein 1 subunit delta                                      | 1102 | 16 | 365  | 923  | 0.7581 | 1.13  | 100  | 13.85  | 23.31  | 35.09  | 27.48  | 88   | 24.46  | 19.05  | 16.77  | 27.88  |
| P63082 | V-type proton ATPase 16 kDa proteolipid subunit                        | 409  | 7  | 177  | 693  | 0.2676 | -1.50 | 26   | 6.39   | 1.06   | 6.85   | 11.32  | 38   | 11.47  | 5.80   | 14.58  | 6.56   |
| Q8VBW6 | NEDD8-activating enzyme E1 regulatory subunit                          | 296  | 5  | 51   | 836  | 0.5525 | -1.65 | 11   | 2.13   | 4.24   | 4.28   | 0.00   | 18   | 3.82   | 3.31   | 1.46   | 9.02   |
| P11983 | T-complex protein 1 subunit alpha                                      | 1194 | 17 | 340  | 589  | 0.3275 | -1.60 | 64   | 9.59   | 22.25  | 19.68  | 12.93  | 103  | 19.88  | 24.85  | 13.13  | 45.10  |
| Q9D8B3 | Charged multivesicular body protein 4b                                 | 384  | 6  | 71   | 1452 | 0.9262 | 1.10  | 21   | 4.26   | 3.18   | 0.86   | 12.93  | 19   | 6.12   | 9.94   | 0.73   | 2.46   |
| P21279 | Guanine nucleotide-binding protein G(q) subunit alpha                  | 242  | 4  | 73   | 204  | 0.1752 | -1.84 | 11   | 0.00   | 6.36   | 4.28   | 0.00   | 20   | 5.35   | 5.80   | 5.10   | 3.28   |
| P58252 | Elongation factor 2                                                    | 1830 | 27 | 775  | 479  | 0.3074 | -1.75 | 122  | 2.13   | 49.80  | 42.79  | 27.48  | 213  | 60.40  | 32.30  | 51.05  | 69.71  |
| P62075 | Mitochondrial import inner membrane translocase subunit Tim13          | 341  | 5  | 65   | 1292 | 0.5808 | 7.80  | 6    | 6.39   | 0.00   | 0.00   | 0.00   | 1    | 0.00   | 0.00   | 0.00   | 0.82   |
| Q76M23 | Serine/threonine-protein phosphatase 2A 65 kDa regulatory subunit A    | 1389 | 22 | 713  | 731  | 0.6209 | -1.05 | 181  | 34.10  | 49.80  | 50.49  | 46.89  | 191  | 45.11  | 55.49  | 51.78  | 38.54  |
| Q3UNZ8 | Quinone oxidoreductase-like protein 2                                  | 198  | 2  | 94   | 1150 | 0.5462 | -1.45 | 19   | 3.20   | 8.48   | 7.70   | 0.00   | 28   | 6.88   | 7.45   | 2.19   | 11.48  |
| Q61425 | Hydroxyacyl-coenzyme A dehydrogenase, mitochondrial                    | 313  | 5  | 75   | 1208 | 0.8107 | -1.22 | 18   | 7.46   | 4.24   | 5.14   | 1.62   | 23   | 3.06   | 8.28   | 2.19   | 9.02   |
| P70372 | ELAV-like protein 1                                                    | 305  | 4  | 74   | 1285 | 0.5330 | -1.18 | 16   | 2.13   | 7.42   | 5.99   | 0.00   | 18   | 4.59   | 7.45   | 2.19   | 4.10   |
| P14206 | 40S ribosomal protein SA                                               | 578  | 8  | 367  | 752  | 0.3155 | -1.29 | 83   | 15.99  | 30.73  | 29.95  | 6.47   | 107  | 29.05  | 28.99  | 24.79  | 24.60  |
| Q8CHT1 | Ephexin-1                                                              | 228  | 4  | 24   | 1369 | 0.5959 | -1.68 | 5    | 2.13   | 0.00   | 2.57   | 0.00   | 8    | 3.06   | 0.00   | 0.73   | 4.10   |
| Q62205 | Sodium channel protein type 9 subunit alpha                            | 121  | 2  | 108  | 1231 | 0.9611 | 1.77  | 33   | 15.99  | 2.12   | 14.55  | 0.00   | 18   | 6.88   | 1.66   | 5.83   | 4.10   |
| O88545 | COP9 signalosome complex subunit 6                                     | 162  | 3  | 27   | 37   | 0.0502 | -5.94 | 2    | 0.00   | 2.12   | 0.00   | 0.00   | 13   | 3.82   | 2.48   | 2.19   | 4.10   |
| Q8BIG7 | Catechol O-methyltransferase domain-containing protein 1               | 184  | 3  | 89   | 422  | 0.1584 | 1.37  | 31   | 8.53   | 4.24   | 6.85   | 11.32  | 23   | 6.88   | 4.14   | 5.83   | 5.74   |
| Q9JHK4 | Geranylgeranyl transferase type-2 subunit alpha                        | 402  | 6  | 45   | 746  | 0.3850 | -2.98 | 4    | 0.00   | 2.12   | 1.71   | 0.00   | 11   | 1.53   | 4.97   | 0.00   | 4.92   |
| Q9ESN6 | Tripartite motif-containing protein 2                                  | 365  | 6  | 97   | 1129 | 0.4555 | 1.10  | 27   | 7.46   | 7.42   | 4.28   | 8.08   | 25   | 7.65   | 7.45   | 0.73   | 9.02   |
| O88447 | Kinesin light chain 1                                                  | 267  | 4  | 27   | 284  | 0.1081 | 2.68  | 11   | 2.13   | 4.24   | 4.28   | 0.00   | 4    | 0.76   | 2.48   | 0.73   | 0.00   |
| P19096 | Fatty acid synthase                                                    | 4224 | 62 | 1541 | 95   | 0.1164 | 1.47  | 532  | 131.08 | 113.38 | 105.27 | 182.69 | 363  | 104.74 | 114.29 | 61.99  | 82.01  |
| Q6DPW4 | Nucleolar protein 58                                                   | 174  | 3  | 6    | 1503 | 0.3910 | 1.06  | 1    | 0.00   | 1.06   | 0.00   | 0.00   | 0    | 0.00   | 0.00   | 0.00   | 0.00   |
| Q9CXY6 | Interleukin enhancer-binding factor 2                                  | 342  | 6  | 35   | 1186 | 0.2972 | -1.94 | 3    | 0.00   | 3.18   | 0.00   | 0.00   | 6    | 0.76   | 2.48   | 2.92   | 0.00   |
| P70441 | Na(+)/H(+) exchange regulatory cofactor NHE-RF1                        | 212  | 3  | 66   | 1469 | 0.8607 | -1.17 | 13   | 7.46   | 0.00   | 0.86   | 4.85   | 15   | 0.76   | 10.77  | 1.46   | 2.46   |
| Q9JME7 | Trafficking protein particle complex subunit 2-like protein            | 132  | 2  | 19   | 693  | 0.1887 | -3.94 | 2    | 1.07   | 1.06   | 0.00   | 0.00   | 8    | 1.53   | 0.83   | 4.38   | 1.64   |
| P49312 | Heterogeneous nuclear ribonucleoprotein A1                             | 457  | 7  | 119  | 840  | 0.5168 | -1.60 | 20   | 4.26   | 6.36   | 7.70   | 1.62   | 32   | 8.41   | 6.63   | 2.92   | 13.94  |
| Q02357 | Ankyrin-1                                                              | 447  | 7  | 76   | 1214 | 0.7562 | -1.16 | 15   | 2.13   | 6.36   | 5.14   | 1.62   | 18   | 2.29   | 9.11   | 2.19   | 4.10   |
| P27773 | Protein disulfide-isomerase A3                                         | 1357 | 22 | 495  | 111  | 0.0656 | 1.53  | 148  | 33.04  | 29.67  | 35.09  | 50.12  | 96   | 21.41  | 27.33  | 24.79  | 22.96  |
| P60335 | Poly(rC)-binding protein 1                                             | 351  | 5  | 168  | 558  | 0.2497 | 1.33  | 55   | 11.72  | 12.72  | 19.68  | 11.32  | 42   | 9.17   | 16.56  | 9.48   | 6.56   |
| P16858 | Glyceraldehyde-3-phosphate dehydrogenase                               | 2035 | 28 | 5690 | 293  | 0.2273 | -1.22 | 1290 | 298.39 | 404.78 | 339.77 | 247.36 | 1571 | 353.21 | 427.34 | 339.83 | 450.23 |
| P68040 | Guanine nucleotide-binding protein subunit beta-2-like 1               | 978  | 15 | 309  | 857  | 0.5026 | -1.34 | 72   | 27.71  | 19.07  | 25.68  | 0.00   | 97   | 16.82  | 18.22  | 21.15  | 41.00  |
| Q8K310 | Matrin-3                                                               | 595  | 8  | 200  | 1058 | 0.5827 | -1.25 | 30   | 12.79  | 8.48   | 8.56   | 0.00   | 37   | 9.94   | 5.80   | 5.83   | 15.58  |
| Q8BVQ5 | Protein phosphatase methylesterase 1                                   | 295  | 4  | 76   | 234  | 0.1701 | -1.68 | 12   | 1.07   | 8.48   | 2.57   | 0.00   | 20   | 6.12   | 5.80   | 5.10   | 3.28   |
| Q9QXY6 | EH domain-containing protein 3                                         | 383  | 6  | 47   | 511  | 0.1839 | -4.33 | 4    | 1.07   | 2.12   | 0.86   | 0.00   | 18   | 1.53   | 2.48   | 3.65   | 9.84   |
| Q8BWT1 | 3-ketoacyl-CoA thiolase, mitochondrial                                 | 676  | 10 | 120  | 792  | 0.2448 | -1.76 | 18   | 1.07   | 6.36   | 9.41   | 1.62   | 32   | 9.17   | 13.25  | 5.10   | 4.92   |
| Q9D0T1 | NHP2-like protein 1                                                    | 153  | 2  | 28   | 1456 | 0.6758 | -1.43 | 6    | 3.20   | 2.12   | 0.86   | 0.00   | 9    | 0.76   | 1.66   | 1.46   | 4.92   |
| Q8VCW8 | Acyl-CoA synthetase family member 2, mitochondrial                     | 411  | 7  | 35   | 1498 | 0.9513 | 1.28  | 9    | 1.07   | 1.06   | 6.85   | 0.00   | 7    | 3.82   | 2.48   | 0.73   | 0.00   |
| O08532 | Voltage-dependent calcium channel subunit alpha-2/delta-1              | 1319 | 20 | 387  | 39   | 0.0779 | 2.71  | 175  | 44.76  | 40.27  | 41.08  | 48.50  | 64   | 14.53  | 2.48   | 35.00  | 12.30  |
| Q9CQY6 | Uncharacterized protein C6orf125 homolog                               | 217  | 3  | 71   | 1193 | 0.5161 | -1.33 | 16   | 8.53   | 0.00   | 4.28   | 3.23   | 21   | 7.65   | 7.45   | 2.19   | 4.10   |
| Q8BJU0 | Small glutamine-rich tetratricopeptide repeat-containing protein alpha | 293  | 5  | 50   | 9    | 0.0274 | -6.34 | 4    | 2.13   | 0.00   | 1.71   | 0.00   | 24   | 5.35   | 6.63   | 5.83   | 6.56   |
| P97765 | WW domain-binding protein 2                                            | 174  | 2  | 66   | 1461 | 0.9133 | -1.07 | 12   | 4.26   | 2.12   | 5.14   | 0.00   | 12   | 4.59   | 0.00   | 3.65   | 4.10   |
| Q922S4 | cGMP-dependent 3',5'-cyclic phosphodiesterase                          | 522  | 8  | 114  | 1139 | 0.7811 | 1.31  | 26   | 1.07   | 9.54   | 15.41  | 0.00   | 20   | 1.53   | 4.97   | 5.10   | 8.20   |
| P62983 | Ubiquitin-40S ribosomal protein S27a                                   | 108  | 2  | 31   | 218  | 0.0817 | -4.23 | 3    | 0.00   | 1.06   | 1.71   | 0.00   | 12   | 4.59   | 4.14   | 2.19   | 0.82   |
| Q05816 | Fatty acid-binding protein, epidermal                                  | 1106 | 16 | 736  | 655  | 0.5663 | 1.17  | 264  | 56.48  | 67.82  | 55.63  | 84.07  | 226  | 68.04  | 70.40  | 72.20  | 15.58  |
| P26638 | Seryl-rRNA synthetase, cytoplasmic                                     | 597  | 9  | 176  | 790  | 0.4784 | -1.24 | 46   | 11.72  | 14.83  | 12.84  | 6.47   | 57   | 22.94  | 11.59  | 10.21  | 12.30  |
| Q9CQF3 | Cleavage and polyadenylation specificity factor subunit 5              | 256  | 4  | 46   | 1100 | 0.6796 | 1.70  | 12   | 7.46   | 1.06   | 3.42   | 0.00   | 7    | 3.82   | 1.66   | 0.73   | 0.82   |
| P40142 | Transketolase                                                          | 1064 | 15 | 694  | 248  | 0.2309 | 1.61  | 223  | 47.96  | 47.68  | 43.65  | 84.07  | 139  | 47.40  | 51.35  | 20.42  | 19.68  |
| Q9WUR2 | Peroxisomal 3,2-trans-enoyl-CoA isomerase                              | 247  | 4  | 25   | 1072 | 0.3482 | -1.67 | 3    | 1.07   | 0.00   | 1.71   | 0.00   | 5    | 1.53   | 1.66   | 1.46   | 0.00   |
| Q9CYH2 | Uncharacterized protein C10orf58 homolog                               | 250  | 4  | 88   | 1455 | 0.8310 | -1.05 | 21   | 10.66  | 4.24   | 5.99   | 0.00   | 22   | 5.35   | 0.83   | 11.67  | 4.10   |
| P07724 | Serum albumin                                                          | 1918 |    |      |      |        |       |      |        |        |        |        |      |        |        |        |        |

|        |                                                                                          |      |    |      |      |        |       |     |        |        |        |        |     |        |        |        |        |
|--------|------------------------------------------------------------------------------------------|------|----|------|------|--------|-------|-----|--------|--------|--------|--------|-----|--------|--------|--------|--------|
| P10922 | Histone H1.0                                                                             | 252  | 3  | 157  | 730  | 0.2144 | 1.35  | 37  | 9.59   | 6.36   | 6.85   | 14.55  | 28  | 9.94   | 5.80   | 2.19   | 9.84   |
| P12815 | Programmed cell death protein 6                                                          | 273  | 4  | 176  | 951  | 0.4534 | -1.30 | 41  | 13.85  | 2.12   | 8.56   | 16.17  | 53  | 8.41   | 7.45   | 24.07  | 13.12  |
| Q9CRB6 | Tubulin polymerization-promoting protein family member 3                                 | 208  | 3  | 251  | 115  | 0.0513 | -1.46 | 59  | 17.05  | 9.54   | 14.55  | 17.78  | 86  | 22.17  | 19.88  | 23.34  | 20.50  |
| Q62059 | Versican core protein                                                                    | 603  | 8  | 251  | 1374 | 0.6412 | 1.08  | 48  | 18.12  | 2.12   | 24.82  | 3.23   | 45  | 16.06  | 9.94   | 8.02   | 10.66  |
| Q8BKZ9 | Pyruvate dehydrogenase protein X component, mitochondrial                                | 434  | 7  | 56   | 563  | 0.1229 | 2.32  | 14  | 2.13   | 5.30   | 5.14   | 1.62   | 6   | 0.00   | 0.83   | 3.65   | 1.64   |
| Q99P72 | Reticulon-4                                                                              | 882  | 14 | 390  | 515  | 0.2647 | 1.23  | 120 | 45.82  | 19.07  | 30.81  | 24.25  | 97  | 27.52  | 18.22  | 26.25  | 25.42  |
| P31650 | Sodium- and chloride-dependent GABA transporter 3                                        | 214  | 3  | 188  | 917  | 0.6392 | 1.18  | 56  | 12.79  | 13.78  | 21.40  | 8.08   | 48  | 17.58  | 8.28   | 10.21  | 11.48  |
| P05063 | Fructose-bisphosphate aldolase C                                                         | 1610 | 21 | 1583 | 807  | 0.3442 | -1.41 | 298 | 70.33  | 145.17 | 82.16  | 0.00   | 421 | 90.98  | 183.03 | 74.38  | 72.17  |
| Q9Z140 | Copine-6                                                                                 | 711  | 11 | 122  | 676  | 0.2698 | 2.63  | 41  | 9.59   | 16.95  | 11.13  | 3.23   | 16  | 7.65   | 0.00   | 2.19   | 5.74   |
| Q8VD37 | SH3-containing GRB2-like protein 3-interacting protein 1                                 | 351  | 6  | 60   | 1407 | 0.7893 | -1.12 | 14  | 6.39   | 1.06   | 6.85   | 0.00   | 16  | 1.53   | 2.48   | 2.19   | 9.84   |
| P62774 | Myotrophin                                                                               | 149  | 2  | 182  | 1340 | 0.8004 | -1.03 | 35  | 22.38  | 6.36   | 3.42   | 3.23   | 37  | 3.82   | 13.25  | 14.58  | 4.92   |
| Q9Z218 | Dipeptidyl aminopeptidase-like protein 6                                                 | 897  | 15 | 244  | 1189 | 0.5858 | -1.22 | 51  | 8.53   | 13.78  | 29.10  | 0.00   | 63  | 6.88   | 7.45   | 20.42  | 27.88  |
| Q80TB8 | Synaptic vesicle membrane protein VAT-1 homolog-like                                     | 398  | 6  | 119  | 300  | 0.0036 | -3.81 | 12  | 3.20   | 6.36   | 2.57   | 0.00   | 46  | 14.53  | 17.39  | 10.21  | 4.10   |
| Q9JKL4 | NADH dehydrogenase [ubiquinone] 1 alpha subcomplex assembly factor                       | 237  | 4  | 82   | 1394 | 0.6370 | 1.06  | 25  | 6.39   | 0.00   | 4.28   | 14.55  | 24  | 6.88   | 4.14   | 8.75   | 4.10   |
| Q91VT4 | Carbonyl reductase family member 4                                                       | 175  | 3  | 16   | 1027 | 0.1929 | 7.54  | 6   | 3.20   | 0.00   | 2.57   | 0.00   | 1   | 0.76   | 0.00   | 0.00   | 0.00   |
| P97822 | Acidic leucine-rich nuclear phosphoprotein 32 family member E                            | 338  | 5  | 81   | 1068 | 0.7397 | -1.39 | 19  | 7.46   | 5.30   | 2.57   | 3.23   | 26  | 6.88   | 11.59  | 0.73   | 6.56   |
| P19536 | Cytochrome c oxidase subunit 5B, mitochondrial                                           | 244  | 4  | 410  | 706  | 0.4326 | -1.55 | 63  | 31.97  | 11.66  | 5.99   | 12.93  | 97  | 17.58  | 21.53  | 44.48  | 13.12  |
| P16388 | Potassium voltage-gated channel subfamily A member 1                                     | 193  | 2  | 17   | 873  | 0.1696 | 4.89  | 4   | 2.13   | 1.06   | 0.86   | 0.00   | 1   | 0.00   | 0.83   | 0.00   | 0.00   |
| Q8BMF4 | Dihydropolyllysine-residue acetyltransferase component of pyruvate dehydrogenase complex | 1192 | 17 | 878  | 31   | 0.0596 | 2.43  | 329 | 62.87  | 74.17  | 77.03  | 114.79 | 135 | 53.52  | 34.78  | 24.79  | 22.14  |
| O88456 | Calpain small subunit 1                                                                  | 300  | 4  | 150  | 678  | 0.3642 | 1.75  | 49  | 18.12  | 8.48   | 18.83  | 3.23   | 28  | 5.35   | 4.97   | 10.94  | 6.56   |
| Q8JZQ9 | Eukaryotic translation initiation factor 3 subunit B                                     | 279  | 4  | 92   | 374  | 0.1593 | -2.27 | 10  | 0.00   | 0.00   | 10.27  | 0.00   | 23  | 5.35   | 0.83   | 7.29   | 9.84   |
| Q9CQH3 | NADH dehydrogenase [ubiquinone] 1 beta subcomplex subunit 5, mitochondrial               | 274  | 4  | 221  | 250  | 0.1463 | 1.34  | 72  | 19.18  | 16.95  | 16.26  | 19.40  | 53  | 13.76  | 11.59  | 18.23  | 9.84   |
| Q8BW75 | Amine oxidase [flavin-containing] B                                                      | 391  | 6  | 48   | 960  | 0.7389 | 1.59  | 11  | 4.26   | 4.24   | 2.57   | 0.00   | 7   | 0.76   | 0.83   | 2.92   | 2.46   |
| Q61207 | Sulfated glycoprotein 1                                                                  | 552  | 8  | 145  | 1213 | 0.8124 | 2.31  | 17  | 14.92  | 0.00   | 0.86   | 1.62   | 8   | 0.76   | 0.83   | 5.10   | 0.82   |
| O54983 | Mu-crystallin homolog                                                                    | 775  | 11 | 424  | 465  | 0.2434 | -1.73 | 73  | 33.04  | 15.89  | 17.97  | 6.47   | 127 | 21.41  | 44.72  | 25.52  | 35.26  |
| P50114 | Protein S100-B                                                                           | 138  | 2  | 104  | 1432 | 0.5793 | -1.43 | 5   | 5.33   | 0.00   | 0.00   | 0.00   | 8   | 0.76   | 2.48   | 4.38   | 0.00   |
| Q9D819 | Inorganic pyrophosphatase                                                                | 586  | 8  | 252  | 493  | 0.2343 | -2.10 | 46  | 12.79  | 19.07  | 13.69  | 0.00   | 95  | 22.94  | 24.85  | 18.96  | 28.70  |
| P63005 | Platelet-activating factor acetylhydrolase IB subunit alpha                              | 577  | 8  | 165  | 384  | 0.1780 | -1.48 | 34  | 12.79  | 6.36   | 10.27  | 4.85   | 51  | 13.00  | 17.39  | 14.58  | 5.74   |
| O35633 | Vesicular inhibitory amino acid transporter                                              | 195  | 3  | 85   | 1274 | 0.5995 | 1.01  | 29  | 7.46   | 4.24   | 11.98  | 4.85   | 28  | 9.17   | 1.66   | 12.40  | 4.92   |
| O55026 | Ectonucleoside triphosphate diphosphohydrolase 2                                         | 193  | 3  | 4    | 1404 | 0.3910 | 1.62  | 2   | 0.00   | 0.00   | 0.00   | 1.62   | 0   | 0.00   | 0.00   | 0.00   | 0.00   |
| P16460 | Argininosuccinate synthase                                                               | 400  | 6  | 83   | 970  | 0.3647 | -1.55 | 11  | 3.20   | 2.12   | 5.99   | 0.00   | 17  | 2.29   | 4.97   | 10.21  | 0.00   |
| P26883 | Peptidyl-prolyl cis-trans isomerase FKBP1A                                               | 501  | 6  | 338  | 254  | 0.1614 | -1.80 | 41  | 28.77  | 4.24   | 5.14   | 3.23   | 75  | 18.35  | 17.39  | 29.90  | 9.02   |
| Q9WUB3 | Glycogen phosphorylase, muscle form                                                      | 1015 | 15 | 412  | 923  | 0.5916 | -1.30 | 85  | 5.33   | 23.31  | 29.10  | 27.48  | 110 | 32.87  | 14.91  | 16.77  | 45.92  |
| P84089 | Enhancer of rudimentary homolog                                                          | 130  | 2  | 24   | 1466 | 0.8481 | 2.19  | 9   | 8.53   | 0.00   | 0.00   | 0.00   | 4   | 3.06   | 0.83   | 0.00   | 0.00   |
| P62482 | Voltage-gated potassium channel subunit beta-2                                           | 398  | 6  | 96   | 1393 | 0.6243 | -1.05 | 23  | 4.26   | 10.60  | 8.56   | 0.00   | 25  | 4.59   | 7.45   | 4.38   | 8.20   |
| Q60597 | 2-oxoglutarate dehydrogenase, mitochondrial                                              | 2119 | 31 | 958  | 1129 | 0.6910 | 1.01  | 219 | 66.07  | 74.17  | 70.18  | 8.08   | 217 | 46.64  | 44.72  | 62.72  | 63.15  |
| Q810U3 | Neurofascin                                                                              | 1247 | 20 | 964  | 42   | 0.0191 | 1.60  | 308 | 73.53  | 66.76  | 96.71  | 71.14  | 193 | 32.87  | 41.41  | 68.55  | 50.03  |
| Q9JMH9 | Myosin-XVIIIa                                                                            | 792  | 12 | 171  | 610  | 0.3529 | 1.37  | 53  | 14.92  | 12.72  | 17.12  | 8.08   | 39  | 9.17   | 9.94   | 7.29   | 12.30  |
| Q01853 | Transitional endoplasmic reticulum ATPase                                                | 2580 | 37 | 1089 | 1062 | 0.7090 | 1.07  | 248 | 8.53   | 83.71  | 81.31  | 74.37  | 232 | 37.46  | 67.08  | 45.94  | 81.19  |
| Q922Q8 | Leucine-rich repeat-containing protein 59                                                | 163  | 3  | 15   | 1536 | 0.8751 | 1.21  | 2   | 1.07   | 0.00   | 0.86   | 0.00   | 2   | 0.76   | 0.83   | 0.00   | 0.00   |
| Q6PHZ2 | Calcium/calmodulin-dependent protein kinase type II subunit delta                        | 546  | 8  | 374  | 360  | 0.2288 | 1.42  | 94  | 30.90  | 22.25  | 30.81  | 9.70   | 66  | 15.29  | 10.77  | 28.44  | 11.48  |
| Q99J99 | 3-mercaptopyruvate sulfurtransferase                                                     | 336  | 5  | 112  | 1272 | 0.9807 | 1.01  | 28  | 9.59   | 4.24   | 5.99   | 8.08   | 28  | 8.41   | 9.11   | 5.10   | 4.92   |
| P02088 | Hemoglobin subunit beta-1                                                                | 663  | 7  | 2868 | 121  | 0.1473 | 1.44  | 959 | 309.04 | 212.99 | 194.28 | 242.51 | 666 | 139.91 | 131.68 | 219.50 | 174.68 |
| P47754 | F-actin-capping protein subunit alpha-2                                                  | 696  | 10 | 363  | 758  | 0.5162 | -1.55 | 67  | 18.12  | 24.37  | 24.82  | 0.00   | 104 | 14.53  | 22.36  | 13.86  | 53.31  |
| Q9D1D4 | Transmembrane emp24 domain-containing protein 10                                         | 225  | 3  | 45   | 1145 | 0.8999 | 1.43  | 17  | 11.72  | 1.06   | 2.57   | 1.62   | 12  | 2.29   | 1.66   | 2.19   | 5.74   |
| Q9D6R2 | Isocitrate dehydrogenase [NAD] subunit alpha, mitochondrial                              | 1126 | 16 | 781  | 98   | 0.0936 | -1.78 | 121 | 33.04  | 43.44  | 35.09  | 9.70   | 216 | 55.81  | 64.60  | 48.13  | 47.56  |
| P70202 | Latexin                                                                                  | 355  | 5  | 216  | 221  | 0.0193 | 1.51  | 67  | 22.38  | 15.89  | 14.55  | 14.55  | 45  | 15.29  | 13.25  | 8.02   | 8.20   |
| Q80Y14 | Glutaredoxin-related protein 5, mitochondrial                                            | 155  | 2  | 48   | 716  | 0.3276 | -1.57 | 7   | 7.46   | 0.00   | 0.00   | 0.00   | 12  | 3.82   | 4.97   | 2.92   | 0.00   |
| P80318 | T-complex protein 1 subunit gamma                                                        | 1331 | 18 | 496  | 82   | 0.0178 | 1.40  | 154 | 31.97  | 45.56  | 44.50  | 32.33  | 111 | 26.76  | 32.30  | 26.98  | 24.60  |
| Q8R5M8 | Cell adhesion molecule 1                                                                 | 232  | 3  | 66   | 130  | 0.0837 | 2.24  | 22  | 4.26   | 7.42   | 6.85   | 3.23   | 10  | 0.76   | 0.83   | 7.29   | 0.82   |
| Q9JIA1 | Leucine-rich glioma-inactivated protein 1                                                | 537  | 8  | 153  | 904  | 0.5379 | 1.46  | 39  | 13.85  | 4.24   | 16.26  | 4.85   | 27  | 7.65   | 10.77  | 5.10   | 3.28   |
| O08709 | Peroxisomal protein 6                                                                    | 1179 | 16 | 1539 | 329  | 0.2427 | 1.31  | 455 | 142.80 | 82.65  | 148.92 | 80.84  | 347 | 117.74 | 77.85  | 70.01  | 81.19  |
| Q9CQ62 | 2,4-dienoyl-CoA reductase, mitochondrial                                                 | 591  | 9  | 192  | 370  | 0.2444 | 1.66  | 63  | 23.44  | 8.48   | 15.41  | 16.17  | 38  | 9.17   | 12.42  | 11.67  | 4.92   |
| Q8K183 | Pyridoxal kinase                                                                         | 720  | 10 | 311  | 527  | 0.2980 | -1.69 | 63  | 14.92  | 25.43  | 23.11  | 0.00   | 107 | 24.46  | 28.16  | 24.79  | 29.52  |
| Q11011 | Puromycin-sensitive aminopeptidase                                                       | 1559 | 23 | 666  | 893  | 0.5385 | -1.24 | 144 | 4.26   | 48.74  | 48.78  | 42.04  | 178 | 43.58  | 23.19  | 38.65  | 72.99  |
| Q8BVE3 | V-type proton ATPase subunit H                                                           | 890  | 14 | 512  | 708  | 0.5654 | 1.11  | 131 | 22.38  | 30.73  | 40.22  | 37.18  | 118 | 26.76  | 32.30  | 36.46  | 22.14  |
| P80313 | T-complex protein 1 subunit eta                                                          | 927  | 12 | 267  | 277  | 0.0977 | 1.33  | 79  | 18.12  | 22.25  | 20.54  | 17.78  | 59  | 15.29  | 21.53  | 10.94  | 11.48  |
| Q91WS0 | CDGSH iron-sulfur domain-containing protein 1                                            | 451  | 7  | 274  | 914  | 0.4016 | -1.33 | 43  | 30.90  | 2.12   | 3.42   | 6.47   | 57  | 9.94   | 11.59  | 25.52  | 9.84   |
| Q99LR1 | Monoacylglycerol lipase ABHD12                                                           | 155  | 3  | 11   | 1543 | 0.9617 | 1.12  | 1   | 0.00   | 0.00   | 0.86   | 0.00   | 1   | 0.76   | 0.00   | 0.00   | 0.00   |
| P40336 | Vacuolar protein sorting-associated protein 26A                                          | 165  | 3  | 15   | 1515 | 0.9091 | 1.39  | 2   | 0.00   | 2.12   | 0.00   | 0.00   | 2   | 1.53   | 0.00   | 0.00   | 0.00   |
| Q9DCD0 | 6-phosphogluconate dehydrogenase, decarboxylating                                        | 397  | 6  | 115  | 961  | 0.4798 | -1.31 | 23  | 2.13   | 6.36   | 9.41   | 4.85   | 30  | 6.88   | 12.42  | 7.29   | 3.28   |
| P58389 | Serine/threonine-protein phosphatase 2A activator                                        | 329  | 5  | 142  | 679  | 0.2773 | -1.56 | 29  | 8.53   | 12.72  | 7.70   | 0.00   | 45  | 8.41   | 17.39  | 10.21  | 9.02   |
| P63325 | 40S ribosomal protein S10                                                                | 282  | 4  | 145  | 308  | 0.0902 | 1.45  | 47  | 13.85  | 12.72  | 11.13  | 9.70   | 33  | 6.88   | 9.94   | 10.94  | 4.92   |
| Q61699 | Heat shock protein 105 kDa                                                               | 1149 | 17 | 478  | 160  | 0.2127 | -2.27 | 73  | 10.66  | 26.49  | 35.95  | 0.00   | 166 | 29.05  | 36.44  | 48.86  | 51.67  |
| P97450 | ATP synthase-coupling factor 6, mitochondrial                                            | 401  | 6  | 145  | 665  | 0.6741 | 3.78  | 14  | 12.79  | 0.00   | 0.00   | 1.62   | 4   | 1.53   | 0.83   | 1.46   | 0.00   |
| O55013 | Trafficking protein particle complex subunit 3                                           | 380  | 6  | 85   | 257  | 0.1937 | -1.97 | 16  | 6.39   | 3.18   | 1.71   | 4.85   | 32  | 5.35   | 8.28   | 11.67  | 6.56   |
| P32921 | Tryptophanyl-tRNA synthetase, cytoplasmic                                                | 381  | 6  | 73   | 676  | 0.1043 | -1.64 | 14  | 4.26   | 0.00   | 7.70   | 1.62   | 22  | 8.41   | 2.48   | 7.29   | 4.10   |
| Q8BP47 | Asparaginyl-tRNA synthetase, cytoplasmic                                                 | 570  | 9  | 181  | 103  | 0.0019 | 1.85  | 65  | 18.12  | 20.13  | 17.12  | 9.70   | 35  | 11.47  | 10.77  | 8.02   | 4.92   |
| P48320 | Glutamate decarboxylase 2                                                                | 640  | 9  | 251  | 112  | 0.0145 | 1.89  | 85  | 22.38  | 24.37  | 24.82  | 12.93  | 45  | 15.29  | 9.11   | 14.58  | 5.74   |
| Q2NL51 | Glycogen synthase kinase-3 alpha                                                         | 305  | 4  | 91   | 996  | 0.4554 | -1.24 | 17  | 2.13   | 7.42   | 4.28   | 3.23   | 21  | 2.29   | 4.97   | 6.56   | 7.38   |
| P62305 | Small nuclear ribonucleoprotein E                                                        | 227  | 3  | 66   | 1546 | 0.8825 | -1.04 | 6   | 6.39   | 0.00   | 0.00   | 0.00   | 7   | 0.00   | 0.83   | 5.83   | 0.00   |
| Q61753 | D-3-phosphoglycerate dehydrogenase                                                       | 780  | 10 | 327  | 1171 | 0.9200 | -1.00 | 90  | 25.58  | 15.89  | 32.52  | 16.17  | 90  | 15.29  | 26.50  | 24.07  | 24.60  |
| Q8R3V5 | Endophilin-B2                                                                            | 372  | 5  |      |      |        |       |     |        |        |        |        |     |        |        |        |        |

|        |                                                                   |      |    |      |      |        |       |     |       |        |       |       |     |       |        |        |        |
|--------|-------------------------------------------------------------------|------|----|------|------|--------|-------|-----|-------|--------|-------|-------|-----|-------|--------|--------|--------|
| Q3TC72 | Fumarylacetoacetate hydrolase domain-containing protein 2A        | 402  | 6  | 126  | 858  | 0.4718 | -1.52 | 27  | 12.79 | 7.42   | 5.14  | 1.62  | 41  | 6.12  | 19.05  | 4.38   | 11.48  |
| Q9Z2I9 | Succinyl-CoA ligase [ADP-forming] subunit beta, mitochondrial     | 1001 | 14 | 481  | 140  | 0.0028 | -2.21 | 70  | 14.92 | 25.43  | 21.40 | 8.08  | 154 | 27.52 | 65.43  | 45.94  | 15.58  |
| P58281 | Dynamin-like 120 kDa protein, mitochondrial                       | 1486 | 22 | 369  | 1055 | 0.6274 | 1.48  | 94  | 2.13  | 16.95  | 45.36 | 29.10 | 63  | 9.17  | 1.66   | 21.15  | 31.16  |
| Q91ZR1 | Ras-related protein Rab-4B                                        | 272  | 4  | 43   | 1023 | 0.6825 | -1.40 | 9   | 1.07  | 4.24   | 0.86  | 3.23  | 13  | 1.53  | 4.97   | 5.83   | 0.82   |
| O88487 | Cytoplasmic dynein 1 intermediate chain 2                         | 490  | 8  | 99   | 540  | 0.1670 | 1.62  | 31  | 11.72 | 3.18   | 5.14  | 11.32 | 19  | 6.12  | 2.48   | 5.83   | 4.92   |
| O54879 | High mobility group protein B3                                    | 204  | 3  | 74   | 440  | 0.0492 | 2.51  | 29  | 9.59  | 2.12   | 9.41  | 8.08  | 12  | 6.88  | 0.83   | 1.46   | 2.46   |
| P17427 | AP-2 complex subunit alpha-2                                      | 1898 | 29 | 760  | 819  | 0.5774 | -1.40 | 142 | 4.26  | 44.50  | 55.63 | 37.18 | 198 | 61.93 | 15.74  | 38.65  | 82.01  |
| P53026 | 60S ribosomal protein L10a                                        | 228  | 4  | 36   | 183  | 0.0135 | -2.90 | 4   | 1.07  | 0.00   | 0.86  | 1.62  | 10  | 3.06  | 0.83   | 1.46   | 4.92   |
| P62631 | Elongation factor 1-alpha 2                                       | 407  | 6  | 491  | 45   | 0.0058 | 1.88  | 151 | 28.77 | 45.56  | 32.52 | 43.65 | 80  | 16.82 | 28.99  | 13.86  | 20.50  |
| P56380 | Bis(5'-nucleosyl)-tetraphosphatase [asymmetrical]                 | 303  | 5  | 93   | 51   | 0.0120 | -6.14 | 8   | 3.20  | 1.06   | 0.86  | 3.23  | 51  | 17.58 | 11.59  | 13.86  | 8.20   |
| P61979 | Heterogeneous nuclear ribonucleoprotein K                         | 610  | 8  | 659  | 1033 | 0.9625 | 1.02  | 172 | 42.63 | 43.44  | 30.81 | 54.97 | 168 | 48.93 | 42.24  | 40.84  | 36.08  |
| Q9QYJ0 | DnaJ homolog subfamily A member 2                                 | 157  | 2  | 26   | 1323 | 0.3234 | 1.90  | 3   | 0.00  | 1.06   | 1.71  | 0.00  | 1   | 0.00  | 0.00   | 1.46   | 0.00   |
| O08788 | Dynactin subunit 1                                                | 1633 | 24 | 490  | 381  | 0.2372 | 1.22  | 153 | 39.43 | 39.21  | 45.36 | 29.10 | 126 | 32.11 | 37.27  | 26.25  | 30.34  |
| Q02053 | Ubiquitin-like modifier-activating enzyme 1                       | 2517 | 32 | 1658 | 731  | 0.4021 | -1.26 | 337 | 89.52 | 135.63 | 98.42 | 12.93 | 425 | 87.16 | 109.32 | 123.24 | 104.97 |
| Q99JP6 | Homer protein homolog 3                                           | 199  | 3  | 21   | 1459 | 0.7678 | -2.02 | 2   | 0.00  | 1.06   | 0.86  | 0.00  | 4   | 3.06  | 0.00   | 0.00   | 0.82   |
| P08228 | Superoxide dismutase [Cu-Zn]                                      | 302  | 4  | 443  | 545  | 0.3503 | 1.30  | 138 | 35.17 | 41.33  | 23.96 | 37.18 | 106 | 13.00 | 32.30  | 35.00  | 25.42  |
| Q922Q1 | MOSC domain-containing protein 2, mitochondrial                   | 201  | 3  | 18   | 1535 | 0.9038 | 1.25  | 5   | 0.00  | 3.18   | 1.71  | 0.00  | 4   | 0.00  | 0.00   | 1.46   | 2.46   |
| Q61644 | Protein kinase C and casein kinase substrate in neurons protein 1 | 1164 | 17 | 787  | 215  | 0.0497 | -1.11 | 187 | 50.09 | 47.68  | 48.78 | 40.42 | 208 | 52.75 | 50.52  | 55.42  | 49.21  |
| Q9CWX3 | RNA-binding protein 8A                                            | 271  | 4  | 71   | 417  | 0.1357 | 1.92  | 21  | 7.46  | 3.18   | 8.56  | 1.62  | 11  | 3.82  | 2.48   | 2.92   | 1.64   |
| O88741 | Ganglioside-induced differentiation-associated protein 1          | 293  | 4  | 103  | 521  | 0.1130 | -1.53 | 15  | 5.33  | 5.30   | 4.28  | 0.00  | 23  | 6.12  | 9.94   | 5.10   | 1.64   |
| Q8JZW4 | Copine-5                                                          | 117  | 2  | 19   | 23   | 0.0027 | 5.14  | 12  | 2.13  | 4.24   | 4.28  | 1.62  | 2   | 0.00  | 1.66   | 0.73   | 0.00   |
| Q9CR98 | Protein FAM136A                                                   | 244  | 3  | 39   | 901  | 0.5860 | 1.15  | 13  | 4.26  | 2.12   | 3.42  | 3.23  | 11  | 0.00  | 4.97   | 1.46   | 4.92   |
| P20917 | Myelin-associated glycoprotein                                    | 548  | 8  | 388  | 860  | 0.5565 | 1.37  | 107 | 6.39  | 36.03  | 22.25 | 42.04 | 78  | 10.70 | 13.25  | 21.88  | 31.98  |
| Q6X893 | Choline transporter-like protein 1                                | 280  | 4  | 167  | 877  | 0.4216 | 1.42  | 34  | 3.20  | 10.60  | 10.27 | 9.70  | 24  | 4.59  | 1.66   | 10.21  | 7.38   |
| Q9WTT4 | V-type proton ATPase subunit G 2                                  | 749  | 10 | 403  | 328  | 0.2208 | 1.48  | 141 | 29.84 | 44.50  | 30.81 | 35.57 | 95  | 37.46 | 16.56  | 26.25  | 14.76  |
| Q68FL4 | Putative adenosylhomocysteinase 3                                 | 271  | 5  | 55   | 831  | 0.4046 | -1.14 | 13  | 3.20  | 2.12   | 4.28  | 3.23  | 15  | 3.82  | 1.66   | 5.10   | 4.10   |
| Q91YR1 | Twinfilin-1                                                       | 210  | 3  | 33   | 1423 | 0.2959 | -1.16 | 7   | 2.13  | 1.06   | 3.42  | 0.00  | 8   | 2.29  | 1.66   | 2.92   | 0.82   |
| Q3UGR5 | Haloacid dehalogenase-like hydrolase domain-containing protein 2  | 413  | 7  | 181  | 1045 | 0.6177 | 1.04  | 51  | 14.92 | 12.72  | 11.98 | 11.32 | 49  | 13.76 | 17.39  | 9.48   | 8.20   |
| Q9DCC4 | Pyroline-5-carboxylate reductase 3                                | 147  | 2  | 20   | 239  | 0.0115 | -7.91 | 0   | 0.00  | 0.00   | 0.00  | 0.00  | 8   | 3.06  | 2.48   | 0.73   | 1.64   |
| Q9DC69 | NADH dehydrogenase [ubiquinone] 1 alpha subcomplex subunit 9, n   | 1058 | 17 | 560  | 725  | 0.3296 | -1.87 | 98  | 19.18 | 42.39  | 35.95 | 0.00  | 182 | 38.23 | 35.61  | 37.92  | 70.53  |
| O35737 | Heterogeneous nuclear ribonucleoprotein H                         | 367  | 6  | 60   | 994  | 0.3498 | -1.47 | 10  | 1.07  | 5.30   | 1.71  | 1.62  | 14  | 5.35  | 4.97   | 1.46   | 2.46   |
| P28651 | Carbonic anhydrase-related protein                                | 509  | 7  | 203  | 306  | 0.1324 | -2.68 | 27  | 11.72 | 9.54   | 4.28  | 1.62  | 73  | 14.53 | 21.53  | 8.75   | 27.88  |
| Q62465 | Synaptic vesicle membrane protein VAT-1 homolog                   | 785  | 12 | 161  | 856  | 0.3607 | -1.36 | 21  | 6.39  | 5.30   | 9.41  | 0.00  | 29  | 12.23 | 9.11   | 7.29   | 0.00   |
| Q9CY64 | Biliverdin reductase A                                            | 294  | 4  | 60   | 31   | 0.0335 | -6.37 | 4   | 2.13  | 0.00   | 1.71  | 0.00  | 24  | 7.65  | 5.80   | 3.65   | 7.38   |
| P26645 | Myristoylated alanine-rich C-kinase substrate                     | 442  | 6  | 306  | 55   | 0.0177 | 1.83  | 97  | 28.77 | 26.49  | 23.96 | 17.78 | 53  | 19.11 | 9.94   | 12.40  | 11.48  |
| Q8VCT3 | Aminopeptidase B                                                  | 248  | 4  | 43   | 439  | 0.2605 | 2.76  | 19  | 7.46  | 4.24   | 0.86  | 6.47  | 7   | 3.06  | 1.66   | 2.19   | 0.00   |
| P05132 | cAMP-dependent protein kinase catalytic subunit alpha             | 323  | 5  | 83   | 1413 | 0.7891 | -1.11 | 16  | 2.13  | 7.42   | 6.85  | 0.00  | 18  | 7.65  | 8.28   | 1.46   | 0.82   |
| Q9Z2I8 | Succinyl-CoA ligase [GDP-forming] subunit beta, mitochondrial     | 317  | 5  | 16   | 568  | 0.0667 | -3.82 | 0   | 0.00  | 0.00   | 0.00  | 0.00  | 4   | 1.53  | 0.83   | 1.46   | 0.00   |
| P32020 | Non-specific lipid-transfer protein                               | 398  | 6  | 40   | 1442 | 0.7144 | -1.53 | 5   | 1.07  | 3.18   | 0.86  | 0.00  | 8   | 3.06  | 0.00   | 1.46   | 3.28   |
| P06151 | L-lactate dehydrogenase A chain                                   | 1077 | 17 | 754  | 714  | 0.4183 | -1.44 | 152 | 57.55 | 44.50  | 41.94 | 8.08  | 218 | 55.05 | 50.52  | 35.00  | 77.91  |
| P61161 | Actin-related protein 2                                           | 855  | 14 | 363  | 775  | 0.3626 | -1.31 | 69  | 21.31 | 23.31  | 24.82 | 0.00  | 91  | 16.82 | 43.07  | 21.15  | 9.84   |
| P61164 | Alpha-centractin                                                  | 403  | 5  | 182  | 939  | 0.2677 | -1.44 | 32  | 6.39  | 15.89  | 9.41  | 0.00  | 46  | 7.65  | 19.05  | 11.67  | 7.38   |
| Q8VDK1 | Nitrilase homolog 1                                               | 207  | 3  | 60   | 1097 | 0.6309 | -1.01 | 20  | 4.26  | 5.30   | 4.28  | 6.47  | 20  | 11.47 | 5.80   | 0.73   | 2.46   |
| Q8BLK3 | Limbic system-associated membrane protein                         | 267  | 4  | 201  | 128  | 0.0732 | 2.17  | 75  | 12.79 | 26.49  | 12.84 | 22.63 | 34  | 9.94  | 5.80   | 8.02   | 10.66  |
| Q9R1R2 | Tripartite motif-containing protein 3                             | 539  | 8  | 50   | 302  | 0.2285 | 8.07  | 19  | 11.72 | 3.18   | 4.28  | 0.00  | 2   | 0.00  | 0.83   | 0.73   | 0.82   |
| Q9QYB1 | Chloride intracellular channel protein 4                          | 429  | 7  | 107  | 640  | 0.3484 | -1.31 | 27  | 10.66 | 3.18   | 5.14  | 8.08  | 35  | 13.00 | 9.94   | 5.10   | 7.38   |
| Q9DB05 | Alpha-soluble NSF attachment protein                              | 1164 | 16 | 481  | 1083 | 0.9556 | 1.06  | 125 | 29.84 | 24.37  | 18.83 | 51.74 | 118 | 19.88 | 28.99  | 29.90  | 39.36  |
| Q62442 | Vesicle-associated membrane protein 1                             | 494  | 6  | 325  | 965  | 0.7734 | -1.09 | 84  | 20.25 | 29.67  | 14.55 | 19.40 | 91  | 25.99 | 23.19  | 29.17  | 13.12  |
| Q9WV54 | Acid ceramidase                                                   | 421  | 7  | 63   | 663  | 0.1126 | -2.63 | 5   | 4.26  | 1.06   | 0.00  | 0.00  | 14  | 10.70 | 1.66   | 0.00   | 1.64   |
| Q9ERI6 | Retinol dehydrogenase 14                                          | 173  | 3  | 22   | 1483 | 0.5804 | 1.39  | 8   | 5.33  | 0.00   | 0.86  | 1.62  | 6   | 1.53  | 0.00   | 0.00   | 4.10   |
| O55135 | Eukaryotic translation initiation factor 6                        | 126  | 2  | 61   | 1372 | 0.7794 | 1.16  | 17  | 8.53  | 5.30   | 3.42  | 0.00  | 15  | 3.06  | 4.97   | 4.38   | 2.46   |
| P56959 | RNA-binding protein FUS                                           | 352  | 6  | 145  | 72   | 0.0634 | 2.64  | 60  | 13.85 | 13.78  | 11.13 | 21.02 | 23  | 7.65  | 7.45   | 5.10   | 2.46   |
| P47963 | 60S ribosomal protein L13                                         | 280  | 4  | 94   | 118  | 0.0418 | 1.98  | 30  | 6.39  | 7.42   | 7.70  | 8.08  | 15  | 5.35  | 3.31   | 2.19   | 4.10   |
| P62746 | Rho-related GTP-binding protein RhoB                              | 287  | 5  | 139  | 1186 | 0.8596 | -1.05 | 39  | 15.99 | 5.30   | 9.41  | 8.08  | 41  | 7.65  | 7.45   | 17.50  | 8.20   |
| Q6ZPE2 | Myotubularin-related protein 5                                    | 678  | 11 | 115  | 1072 | 0.6860 | 1.32  | 41  | 17.05 | 10.60  | 11.98 | 1.62  | 31  | 3.82  | 12.42  | 11.67  | 3.28   |
| Q9JMH6 | Thioredoxin reductase 1, cytoplasmic                              | 286  | 4  | 123  | 565  | 0.2733 | -1.35 | 29  | 8.53  | 4.24   | 9.41  | 6.47  | 39  | 12.23 | 8.28   | 6.56   | 11.48  |
| P80314 | T-complex protein 1 subunit beta                                  | 1485 | 19 | 514  | 573  | 0.4089 | -1.18 | 119 | 30.90 | 32.85  | 35.95 | 19.40 | 140 | 30.58 | 41.41  | 29.90  | 38.54  |
| O54829 | Regulator of G-protein signaling 7                                | 197  | 3  | 21   | 1114 | 0.2430 | -4.69 | 1   | 0.00  | 0.00   | 0.86  | 0.00  | 4   | 0.00  | 0.83   | 0.73   | 2.46   |
| P70168 | Importin subunit beta-1                                           | 1130 | 17 | 323  | 1237 | 0.9110 | 1.12  | 84  | 6.39  | 25.43  | 32.52 | 19.40 | 75  | 16.82 | 8.28   | 24.07  | 25.42  |
| Q91V14 | Solute carrier family 12 member 5                                 | 682  | 10 | 702  | 423  | 0.3019 | 1.36  | 205 | 37.30 | 59.34  | 37.66 | 71.14 | 151 | 40.52 | 30.64  | 43.03  | 36.90  |
| P97351 | 40S ribosomal protein S3a                                         | 281  | 5  | 101  | 342  | 0.2025 | 1.65  | 27  | 8.53  | 10.60  | 3.42  | 4.85  | 17  | 3.82  | 4.14   | 2.92   | 5.74   |
| Q9QZ59 | Doublesex- and mab-3-related transcription factor 1               | 153  | 3  | 69   | 600  | 0.3450 | -2.01 | 11  | 1.07  | 6.36   | 3.42  | 0.00  | 22  | 10.70 | 2.48   | 3.65   | 4.92   |
| P14131 | 40S ribosomal protein S16                                         | 254  | 4  | 156  | 244  | 0.1272 | 1.73  | 58  | 15.99 | 15.89  | 11.98 | 14.55 | 34  | 6.88  | 8.28   | 14.58  | 4.10   |
| P14231 | Sodium/potassium-transporting ATPase subunit beta-2               | 446  | 6  | 657  | 383  | 0.1460 | -1.10 | 144 | 31.97 | 31.79  | 39.37 | 40.42 | 159 | 31.35 | 38.92  | 41.57  | 46.74  |
| O35295 | Transcriptional activator protein Pur-beta                        | 352  | 5  | 104  | 709  | 0.3615 | -1.64 | 19  | 6.39  | 7.42   | 5.14  | 0.00  | 31  | 6.12  | 9.11   | 5.10   | 10.66  |
| Q9Z0P5 | Twinfilin-2                                                       | 195  | 3  | 73   | 274  | 0.0136 | -7.46 | 4   | 1.07  | 2.12   | 0.86  | 0.00  | 30  | 10.70 | 4.97   | 8.75   | 5.74   |
| P12382 | 6-phosphofructokinase, liver type                                 | 813  | 12 | 302  | 1209 | 0.6382 | -1.01 | 92  | 3.20  | 29.67  | 26.53 | 32.33 | 92  | 22.94 | 21.53  | 24.79  | 22.96  |
| P51880 | Fatty acid-binding protein, brain                                 | 484  | 6  | 167  | 1252 | 0.9676 | 1.13  | 62  | 8.53  | 15.89  | 6.85  | 30.72 | 55  | 22.17 | 13.25  | 10.21  | 9.02   |
| O35129 | Prohibitin-2                                                      | 854  | 12 | 433  | 861  | 0.7411 | 1.20  | 107 | 23.44 | 44.50  | 26.53 | 12.93 | 89  | 14.53 | 15.74  | 26.25  | 32.80  |
| Q8R164 | Valacyclovir hydrolase                                            | 490  | 8  | 132  | 712  | 0.3091 | 1.17  | 35  | 10.66 | 5.30   | 12.84 | 6.47  | 30  | 8.41  | 4.97   | 9.48   | 7.38   |
| P50247 | Adenosylhomocysteinase                                            | 458  | 7  | 147  | 263  | 0.0079 | -1.91 | 23  | 5.33  | 8.48   | 7.70  | 1.62  | 44  | 9.94  | 16.56  | 15.31  | 2.46   |
| Q8R001 | Microtubule-associated protein RP/EB family member 2              | 380  | 6  | 147  | 297  | 0.1224 | -2.65 | 22  | 7.46  | 7.42   | 6.85  | 0.00  | 58  | 15.29 | 18.22  | 10.21  | 13.94  |
| Q61361 | Brevian core protein                                              | 632  | 9  | 567  | 433  | 0.3545 | 1.43  | 197 | 60.74 | 44.50  | 64.19 | 27.48 | 138 | 22.17 | 32.30  | 39.38  | 44.28  |
| Q9     |                                                                   |      |    |      |      |        |       |     |       |        |       |       |     |       |        |        |        |

|        |                                                                    |      |    |      |      |        |       |     |        |        |        |        |     |        |        |        |        |
|--------|--------------------------------------------------------------------|------|----|------|------|--------|-------|-----|--------|--------|--------|--------|-----|--------|--------|--------|--------|
| Q9WV85 | Nucleoside diphosphate kinase 3                                    | 239  | 4  | 58   | 1154 | 0.7801 | -1.30 | 17  | 3.20   | 3.18   | 4.28   | 6.47   | 22  | 9.17   | 4.14   | 7.29   | 1.64   |
| P15105 | Glutamine synthetase                                               | 998  | 13 | 1353 | 241  | 0.1727 | -1.36 | 275 | 56.48  | 97.49  | 89.86  | 30.72  | 374 | 90.21  | 105.18 | 94.07  | 84.47  |
| Q8BP67 | 60S ribosomal protein L24                                          | 338  | 5  | 140  | 288  | 0.1888 | 1.74  | 45  | 13.85  | 8.48   | 16.26  | 6.47   | 26  | 3.82   | 5.80   | 8.02   | 8.20   |
| P28661 | Septin-4                                                           | 339  | 5  | 106  | 1382 | 0.7295 | 1.12  | 20  | 3.20   | 8.48   | 8.56   | 0.00   | 18  | 5.35   | 7.45   | 3.65   | 1.64   |
| O08749 | Dihydropolyl dehydrogenase, mitochondrial                          | 1043 | 15 | 839  | 250  | 0.1991 | -1.26 | 190 | 43.69  | 46.62  | 64.19  | 35.57  | 239 | 49.69  | 72.88  | 56.88  | 59.87  |
| Q62393 | Tumor protein D52                                                  | 193  | 3  | 9    | 1370 | 0.5926 | -2.50 | 2   | 1.07   | 0.00   | 0.86   | 0.00   | 5   | 1.53   | 0.00   | 0.00   | 3.28   |
| Q9D0K2 | Succinyl-CoA:3-ketoacid-coenzyme A transferase 1, mitochondrial    | 860  | 12 | 539  | 475  | 0.3472 | 1.22  | 141 | 26.64  | 32.85  | 44.50  | 37.18  | 116 | 26.76  | 38.10  | 23.34  | 27.88  |
| P47757 | F-actin-capping protein subunit beta                               | 878  | 12 | 389  | 508  | 0.1804 | 1.13  | 110 | 23.44  | 21.19  | 24.82  | 40.42  | 97  | 18.35  | 22.36  | 18.96  | 37.72  |
| Q8K1Z0 | Ubiquinone biosynthesis protein COQ9, mitochondrial                | 187  | 2  | 91   | 1190 | 0.6047 | -1.11 | 23  | 9.59   | 1.06   | 7.70   | 4.85   | 26  | 5.35   | 7.45   | 8.02   | 4.92   |
| Q6PEB6 | Mps one binder kinase activator-like 3                             | 209  | 4  | 53   | 1262 | 0.8843 | -1.20 | 14  | 4.26   | 1.06   | 5.14   | 3.23   | 16  | 3.06   | 7.45   | 5.10   | 0.82   |
| P62900 | 60S ribosomal protein L31                                          | 212  | 3  | 176  | 835  | 0.5122 | 1.21  | 56  | 15.99  | 19.07  | 9.41   | 11.32  | 46  | 9.17   | 11.59  | 15.31  | 9.84   |
| P17426 | AP-2 complex subunit alpha-1                                       | 1784 | 27 | 931  | 448  | 0.2551 | -1.70 | 147 | 23.44  | 47.68  | 63.33  | 12.93  | 250 | 69.57  | 42.24  | 56.88  | 81.19  |
| P30416 | Peptidyl-prolyl cis-trans isomerase FKBP4                          | 285  | 5  | 41   | 898  | 0.5765 | -2.47 | 5   | 1.07   | 0.00   | 2.57   | 1.62   | 13  | 2.29   | 9.11   | 0.73   | 0.82   |
| P35762 | CD81 antigen                                                       | 283  | 3  | 971  | 61   | 0.0400 | 1.55  | 289 | 72.47  | 67.82  | 77.88  | 71.14  | 187 | 32.87  | 44.72  | 67.82  | 41.82  |
| Q8K386 | Ras-related protein Rab-15                                         | 320  | 4  | 289  | 562  | 0.3202 | -1.43 | 50  | 25.58  | 2.12   | 22.25  | 0.00   | 71  | 12.23  | 11.59  | 25.52  | 22.14  |
| Q61792 | LIM and SH3 domain protein 1                                       | 219  | 3  | 79   | 28   | 0.0474 | -3.50 | 9   | 8.53   | 0.00   | 0.00   | 0.00   | 30  | 9.94   | 7.45   | 5.10   | 7.38   |
| Q6IRU2 | Tropomyosin alpha-4 chain                                          | 261  | 4  | 75   | 1010 | 0.2978 | 1.36  | 17  | 6.39   | 4.24   | 3.42   | 3.23   | 13  | 3.82   | 7.45   | 1.46   | 0.00   |
| P00920 | Carbonic anhydrase 2                                               | 1099 | 14 | 1377 | 815  | 0.5703 | 1.03  | 356 | 101.24 | 87.95  | 71.04  | 95.39  | 345 | 114.68 | 82.82  | 50.32  | 97.59  |
| P23198 | Chromobox protein homolog 3                                        | 253  | 4  | 62   | 1131 | 0.7536 | -1.30 | 12  | 4.26   | 3.18   | 4.28   | 0.00   | 15  | 0.76   | 4.14   | 2.92   | 7.38   |
| O35381 | Acidic leucine-rich nuclear phosphoprotein 32 family member A      | 223  | 3  | 156  | 1185 | 0.4907 | 1.33  | 46  | 15.99  | 5.30   | 11.98  | 12.93  | 35  | 3.82   | 12.42  | 2.19   | 16.40  |
| Q60605 | Myosin light polypeptide 6                                         | 585  | 8  | 312  | 664  | 0.5948 | 1.36  | 95  | 30.90  | 27.55  | 9.41   | 27.48  | 70  | 14.53  | 16.56  | 27.71  | 11.48  |
| Q9Z0P4 | Paralemmin                                                         | 429  | 6  | 124  | 670  | 0.2005 | 2.14  | 39  | 12.79  | 6.36   | 17.12  | 3.23   | 18  | 10.70  | 0.00   | 3.65   | 4.10   |
| P56564 | Excitatory amino acid transporter 1                                | 728  | 9  | 1899 | 144  | 0.0940 | 1.31  | 540 | 131.08 | 145.17 | 139.50 | 124.49 | 413 | 104.74 | 78.68  | 116.68 | 113.17 |
| Q9Z1G4 | V-type proton ATPase 116 kDa subunit a isoform 1                   | 1337 | 20 | 1418 | 362  | 0.3022 | 1.21  | 404 | 61.81  | 122.92 | 115.54 | 103.47 | 334 | 66.51  | 68.74  | 107.20 | 91.85  |
| Q9WV34 | MAGUK p55 subfamily member 2                                       | 248  | 4  | 80   | 1103 | 0.6900 | -1.28 | 19  | 6.39   | 5.30   | 4.28   | 3.23   | 25  | 5.35   | 3.31   | 4.38   | 11.48  |
| Q6PDM2 | Splicing factor, arginine/serine-rich 1                            | 438  | 7  | 152  | 134  | 0.0304 | 1.84  | 44  | 9.59   | 10.60  | 7.70   | 16.17  | 24  | 3.06   | 8.28   | 3.65   | 9.02   |
| O88952 | Protein lin-7 homolog C                                            | 138  | 2  | 57   | 1358 | 0.8765 | 1.29  | 15  | 6.39   | 0.00   | 6.85   | 1.62   | 12  | 3.06   | 2.48   | 4.38   | 1.64   |
| Q9JM76 | Actin-related protein 2/3 complex subunit 3                        | 380  | 6  | 297  | 782  | 0.5666 | -1.16 | 78  | 27.71  | 12.72  | 21.40  | 16.17  | 90  | 16.82  | 24.02  | 31.36  | 18.04  |
| Q9D615 | NADH dehydrogenase [ubiquinone] 1 beta subcomplex subunit 8, mi    | 532  | 7  | 211  | 349  | 0.2467 | 1.76  | 71  | 23.44  | 11.66  | 13.69  | 22.63  | 41  | 4.59   | 13.25  | 14.58  | 8.20   |
| Q4KMM3 | Oxidation resistance protein 1                                     | 574  | 9  | 179  | 868  | 0.3995 | -1.40 | 41  | 19.18  | 8.48   | 11.98  | 1.62   | 58  | 9.94   | 12.42  | 18.23  | 17.22  |
| Q8BY19 | Tenascin-R                                                         | 1838 | 25 | 2603 | 379  | 0.3354 | 1.23  | 786 | 198.21 | 147.29 | 180.58 | 260.29 | 642 | 162.84 | 162.32 | 179.39 | 136.95 |
| Q9QU10 | Transforming protein RhoA                                          | 163  | 2  | 186  | 1028 | 0.5318 | -1.25 | 44  | 18.12  | 9.54   | 12.84  | 3.23   | 55  | 14.53  | 7.45   | 13.86  | 18.86  |
| Q9D855 | Cytochrome b-c1 complex subunit 7                                  | 434  | 7  | 346  | 1076 | 0.7171 | -1.19 | 63  | 29.84  | 7.42   | 7.70   | 17.78  | 74  | 12.23  | 14.91  | 35.73  | 11.48  |
| Q8C1B7 | Septin-11                                                          | 390  | 6  | 127  | 1211 | 0.8821 | -1.03 | 29  | 8.53   | 6.36   | 11.13  | 3.23   | 30  | 5.35   | 12.42  | 5.83   | 6.56   |
| Q99JF8 | PC4 and SFRS1-interacting protein                                  | 172  | 3  | 98   | 508  | 0.2557 | 2.12  | 30  | 10.66  | 7.42   | 10.27  | 1.62   | 14  | 3.06   | 4.14   | 3.65   | 3.28   |
| P12787 | Cytochrome c oxidase subunit 5A, mitochondrial                     | 423  | 6  | 500  | 1306 | 0.8487 | 1.23  | 90  | 53.28  | 13.78  | 6.85   | 16.17  | 73  | 13.76  | 14.91  | 38.65  | 5.74   |
| Q9JM14 | 5(3)-deoxyribonucleotidase, cytosolic type                         | 331  | 5  | 155  | 428  | 0.2396 | -1.54 | 30  | 15.99  | 0.00   | 13.69  | 0.00   | 46  | 9.17   | 11.59  | 16.04  | 9.02   |
| P63046 | Sulfotransferase 4A1                                               | 142  | 2  | 67   | 1201 | 0.8213 | 1.24  | 24  | 7.46   | 2.12   | 3.42   | 11.32  | 20  | 7.65   | 5.80   | 3.65   | 2.46   |
| P10605 | Cathepsin B                                                        | 288  | 4  | 98   | 65   | 0.0140 | 2.23  | 33  | 7.46   | 12.72  | 5.14   | 8.08   | 15  | 3.06   | 4.97   | 3.65   | 3.28   |
| Q3UHL1 | CaM kinase-like vesicle-associated protein                         | 875  | 14 | 479  | 553  | 0.2131 | 1.48  | 162 | 38.36  | 38.15  | 46.22  | 38.80  | 109 | 46.64  | 27.33  | 26.25  | 9.02   |
| Q8BH59 | Calcium-binding mitochondrial carrier protein Aralar1              | 1827 | 24 | 1296 | 69   | 0.1486 | 1.84  | 413 | 82.06  | 95.37  | 82.16  | 153.59 | 224 | 74.92  | 50.52  | 64.90  | 33.62  |
| P62751 | 60S ribosomal protein L23a                                         | 189  | 3  | 72   | 1356 | 0.9778 | 1.09  | 21  | 7.46   | 2.12   | 7.70   | 3.23   | 19  | 3.82   | 3.31   | 4.38   | 7.38   |
| P19253 | 60S ribosomal protein L13a                                         | 155  | 2  | 57   | 1166 | 0.5918 | -1.13 | 13  | 2.13   | 1.06   | 3.42   | 6.47   | 15  | 2.29   | 4.14   | 5.10   | 3.28   |
| O55131 | Septin-7                                                           | 814  | 12 | 587  | 1052 | 0.8038 | -1.01 | 123 | 29.84  | 31.79  | 34.23  | 27.48  | 124 | 29.05  | 50.52  | 24.07  | 20.50  |
| Q99KJ8 | Dynactin subunit 2                                                 | 676  | 10 | 148  | 182  | 0.0150 | -2.94 | 16  | 4.26   | 5.30   | 5.99   | 0.00   | 46  | 9.17   | 22.36  | 11.67  | 2.46   |
| P97427 | Dihydropyrimidinase-related protein 1                              | 1506 | 21 | 1175 | 110  | 0.0478 | 1.29  | 373 | 106.57 | 89.01  | 88.15  | 88.92  | 288 | 73.39  | 78.68  | 57.61  | 78.73  |
| Q8CHC4 | Synaptotagmin-1                                                    | 1510 | 22 | 933  | 1050 | 0.9747 | -1.02 | 251 | 63.94  | 50.86  | 79.59  | 56.59  | 257 | 53.52  | 89.44  | 67.09  | 46.74  |
| P62852 | 40S ribosomal protein S25                                          | 229  | 4  | 92   | 979  | 0.5220 | 1.32  | 30  | 11.72  | 6.36   | 3.42   | 8.08   | 22  | 2.29   | 8.28   | 3.65   | 8.20   |
| P53810 | Phosphatidylinositol transfer protein alpha isoform                | 461  | 7  | 272  | 405  | 0.1639 | -2.12 | 46  | 12.79  | 18.01  | 11.98  | 3.23   | 97  | 23.70  | 24.85  | 15.31  | 33.62  |
| P62748 | Hippocalcin-like protein 1                                         | 216  | 3  | 105  | 1247 | 0.6770 | 1.08  | 25  | 7.46   | 7.42   | 5.14   | 4.85   | 23  | 5.35   | 3.31   | 10.21  | 4.10   |
| Q8R127 | Probable saccharopine dehydrogenase                                | 382  | 6  | 42   | 1367 | 0.6236 | 1.04  | 7   | 0.00   | 3.18   | 3.42   | 0.00   | 6   | 0.76   | 2.48   | 1.46   | 1.64   |
| Q99JR1 | Sideroflexin-1                                                     | 509  | 7  | 99   | 895  | 0.5356 | -1.49 | 15  | 4.26   | 6.36   | 4.28   | 0.00   | 22  | 6.12   | 3.31   | 2.92   | 9.84   |
| P11627 | Neural cell adhesion molecule L1                                   | 376  | 6  | 244  | 117  | 0.0561 | 2.10  | 91  | 26.64  | 15.89  | 19.68  | 29.10  | 43  | 7.65   | 9.94   | 16.04  | 9.84   |
| Q99L13 | 3-hydroxyisobutyrate dehydrogenase, mitochondrial                  | 966  | 14 | 372  | 648  | 0.4752 | -1.29 | 85  | 29.84  | 15.89  | 17.97  | 21.02  | 109 | 19.11  | 38.92  | 18.96  | 31.98  |
| O35459 | Delta(3,5)-Delta(2,4)-dienoyl-CoA isomerase, mitochondrial         | 357  | 5  | 40   | 1270 | 0.9622 | -1.64 | 9   | 3.20   | 1.06   | 4.28   | 0.00   | 14  | 0.00   | 4.14   | 0.00   | 9.84   |
| P61202 | COP9 signalosome complex subunit 2                                 | 205  | 3  | 9    | 1534 | 0.8688 | 1.24  | 2   | 0.00   | 1.06   | 0.86   | 0.00   | 2   | 0.00   | 0.00   | 0.73   | 0.82   |
| Q9D8Y0 | EF-hand domain-containing protein D2                               | 506  | 7  | 259  | 887  | 0.4008 | -1.21 | 58  | 25.58  | 18.01  | 11.13  | 3.23   | 70  | 19.11  | 18.22  | 15.31  | 17.22  |
| P99027 | 60S acidic ribosomal protein P2                                    | 574  | 7  | 485  | 1121 | 0.9148 | 1.00  | 132 | 43.69  | 33.91  | 20.54  | 33.95  | 132 | 34.40  | 25.67  | 36.46  | 35.26  |
| P62830 | 60S ribosomal protein L23                                          | 413  | 5  | 286  | 1010 | 0.8782 | -1.04 | 82  | 25.58  | 19.07  | 16.26  | 21.02  | 85  | 15.29  | 27.33  | 19.69  | 22.96  |
| Q60668 | Heterogeneous nuclear ribonucleoprotein D0                         | 284  | 4  | 136  | 1323 | 0.7243 | -1.01 | 30  | 7.46   | 12.72  | 8.56   | 1.62   | 31  | 4.59   | 12.42  | 8.75   | 4.92   |
| Q9CVB6 | Actin-related protein 2/3 complex subunit 2                        | 752  | 12 | 183  | 240  | 0.1279 | -1.76 | 35  | 6.39   | 14.83  | 8.56   | 4.85   | 61  | 14.53  | 15.74  | 10.94  | 19.68  |
| Q9D967 | Magnesium-dependent phosphatase 1                                  | 242  | 4  | 41   | 710  | 0.2417 | -2.13 | 7   | 3.20   | 1.06   | 0.00   | 3.23   | 16  | 2.29   | 7.45   | 2.92   | 3.28   |
| Q9CZW5 | Mitochondrial import receptor subunit TOM70                        | 759  | 11 | 223  | 313  | 0.1756 | 1.64  | 75  | 13.85  | 21.19  | 18.83  | 21.02  | 46  | 17.58  | 5.80   | 10.94  | 11.48  |
| Q9D2G2 | Dihydropolyllysine-residue succinyltransferase component of 2-oxog | 582  | 8  | 311  | 899  | 0.3744 | 1.14  | 68  | 10.66  | 22.25  | 17.12  | 17.78  | 59  | 6.88   | 23.19  | 21.15  | 8.20   |
| Q05793 | Basement membrane-specific heparan sulfate proteoglycan core prote | 732  | 13 | 114  | 73   | 0.0618 | 7.69  | 59  | 15.99  | 11.66  | 3.42   | 27.48  | 8   | 3.06   | 0.00   | 2.92   | 1.64   |
| Q9CZC8 | Secernin-1                                                         | 324  | 5  | 89   | 1162 | 0.7188 | -1.23 | 16  | 1.07   | 5.30   | 5.99   | 3.23   | 19  | 6.88   | 3.31   | 7.29   | 1.64   |
| Q9JLC8 | Sacsin                                                             | 215  | 4  | 33   | 985  | 0.2943 | -1.78 | 4   | 0.00   | 1.06   | 0.86   | 1.62   | 6   | 1.53   | 2.48   | 1.46   | 0.82   |
| Q8VDQ8 | NAD-dependent deacetylase sirtuin-2                                | 1173 | 15 | 758  | 1116 | 0.3922 | -1.13 | 156 | 36.23  | 73.11  | 47.07  | 0.00   | 177 | 40.52  | 60.46  | 51.05  | 25.42  |
| Q8K2B3 | Succinate dehydrogenase [ubiquinone] flavoprotein subunit, mitoch  | 1285 | 18 | 556  | 105  | 0.0726 | 1.79  | 186 | 47.96  | 47.68  | 35.09  | 54.97  | 104 | 35.17  | 20.70  | 29.90  | 18.04  |
| O08539 | Myc box-dependent-interacting protein 1                            | 572  | 9  | 429  | 38   | 0.0200 | -1.73 | 76  | 21.31  | 16.95  | 19.68  | 17.78  | 131 | 41.28  | 32.30  | 36.46  | 21.32  |
| Q9JL62 | Glycolipid transfer protein                                        | 319  | 5  | 135  | 1218 | 0.8359 | -1.00 | 45  | 11.72  | 9.54   | 7.70   | 16.17  | 45  | 12.23  | 9.11   | 11.67  | 12.30  |
| P16125 | L-lactate dehydrogenase B chain                                    | 1169 | 16 | 1211 | 127  | 0.2363 | -1.93 | 203 | 58.61  | 67.82  | 59.91  | 16.17  | 391 | 100.15 | 82.82  | 60.53  | 147.62 |
|        |                                                                    |      |    |      |      |        |       |     |        |        |        |        |     |        |        |        |        |



|        |                                                                           |      |    |      |      |        |       |     |        |        |        |        |     |        |        |        |        |
|--------|---------------------------------------------------------------------------|------|----|------|------|--------|-------|-----|--------|--------|--------|--------|-----|--------|--------|--------|--------|
| P51863 | V-type proton ATPase subunit d 1                                          | 1006 | 14 | 685  | 375  | 0.2257 | -2.09 | 107 | 36.23  | 42.39  | 28.24  | 0.00   | 224 | 50.46  | 62.94  | 56.88  | 53.31  |
| Q9CQN1 | Heat shock protein 75 kDa, mitochondrial                                  | 258  | 4  | 279  | 1149 | 0.5923 | 1.05  | 58  | 1.07   | 13.78  | 17.12  | 25.87  | 55  | 9.17   | 14.91  | 14.58  | 16.40  |
| P54227 | Stathmin                                                                  | 236  | 4  | 250  | 1009 | 0.8175 | 1.08  | 75  | 25.58  | 10.60  | 19.68  | 19.40  | 69  | 9.17   | 26.50  | 18.23  | 15.58  |
| Q6A4J8 | Ubiquitin carboxyl-terminal hydrolase 7                                   | 425  | 7  | 83   | 1045 | 0.4189 | -1.51 | 15  | 1.07   | 1.06   | 7.70   | 4.85   | 22  | 8.41   | 0.83   | 8.02   | 4.92   |
| P46096 | Synaptotagmin-1                                                           | 874  | 12 | 1367 | 772  | 0.7094 | 1.06  | 374 | 102.30 | 105.96 | 91.58  | 74.37  | 352 | 84.10  | 79.51  | 84.59  | 104.15 |
| P19246 | Neurofilament heavy polypeptide                                           | 1313 | 18 | 999  | 896  | 0.8196 | 1.01  | 231 | 59.68  | 51.92  | 59.91  | 59.82  | 228 | 44.34  | 59.63  | 71.47  | 52.49  |
| P63328 | Serine/threonine-protein phosphatase 2B catalytic subunit alpha isoform 1 | 916  | 14 | 756  | 202  | 0.1313 | 1.26  | 247 | 60.74  | 56.16  | 68.47  | 61.44  | 196 | 60.40  | 33.96  | 45.21  | 56.59  |
| Q9D051 | Pyruvate dehydrogenase E1 component subunit beta, mitochondrial           | 1527 | 21 | 1294 | 650  | 0.4060 | -1.41 | 263 | 74.60  | 103.84 | 84.73  | 0.00   | 371 | 87.92  | 86.13  | 76.57  | 120.55 |
| Q9D882 | Uncharacterized protein C10orf35 homolog                                  | 134  | 2  | 19   | 735  | 0.0672 | -7.60 | 0   | 0.00   | 0.00   | 0.00   | 0.00   | 8   | 2.29   | 1.66   | 3.65   | 0.00   |
| Q7TQJ3 | Ubiquitin thioesterase OTUB1                                              | 715  | 10 | 629  | 261  | 0.1360 | 1.24  | 193 | 54.35  | 49.80  | 45.36  | 43.65  | 155 | 31.35  | 43.89  | 41.57  | 38.54  |
| Q3TXX4 | Vesicular glutamate transporter 1                                         | 188  | 3  | 140  | 1428 | 0.9692 | 1.18  | 51  | 6.39   | 7.42   | 6.85   | 30.72  | 43  | 5.35   | 10.77  | 18.23  | 9.02   |
| Q9D5V5 | Cullin-5                                                                  | 153  | 3  | 5    | 1147 | 0.2229 | -3.22 | 0   | 0.00   | 0.00   | 0.00   | 0.00   | 3   | 0.76   | 0.00   | 0.00   | 2.46   |
| P11276 | Fibronectin                                                               | 210  | 4  | 10   | 365  | 0.1044 | 12.62 | 13  | 0.00   | 5.30   | 0.86   | 6.47   | 0   | 0.00   | 0.00   | 0.00   | 0.00   |
| P56389 | Cytidine deaminase                                                        | 161  | 3  | 9    | 1204 | 0.3910 | -6.88 | 0   | 0.00   | 0.00   | 0.00   | 0.00   | 7   | 6.88   | 0.00   | 0.00   | 0.00   |
| Q8BSL7 | ADP-ribosylation factor 2                                                 | 124  | 2  | 12   | 430  | 0.0160 | -9.39 | 0   | 0.00   | 0.00   | 0.00   | 0.00   | 9   | 3.82   | 0.83   | 1.46   | 3.28   |
| Q8BMJ3 | Eukaryotic translation initiation factor 1A, X-chromosomal                | 117  | 2  | 3    | 1198 | 0.2021 | -2.26 | 0   | 0.00   | 0.00   | 0.00   | 0.00   | 2   | 1.53   | 0.00   | 0.73   | 0.00   |
| Q01149 | Collagen alpha-2(I) chain                                                 | 317  | 5  | 9    | 804  | 0.3910 | 12.93 | 13  | 0.00   | 0.00   | 0.00   | 12.93  | 0   | 0.00   | 0.00   | 0.00   | 0.00   |
| Q66J56 | Eukaryotic translation initiation factor 3 subunit J                      | 134  | 2  | 4    | 1493 | 0.7674 | -1.41 | 1   | 0.00   | 1.06   | 0.00   | 0.00   | 1   | 0.76   | 0.00   | 0.73   | 0.00   |
| Q61490 | CD166 antigen                                                             | 462  | 8  | 165  | 844  | 0.3057 | 1.31  | 41  | 12.79  | 5.30   | 13.69  | 9.70   | 32  | 7.65   | 0.00   | 10.94  | 13.12  |
| Q8R464 | Cell adhesion molecule 4                                                  | 325  | 4  | 91   | 1510 | 0.7482 | 1.08  | 9   | 4.26   | 4.24   | 0.86   | 0.00   | 9   | 3.06   | 1.66   | 1.46   | 2.46   |
| P21107 | Tropomyosin alpha-3 chain                                                 | 335  | 5  | 149  | 444  | 0.1705 | 1.23  | 44  | 12.79  | 9.54   | 8.56   | 12.93  | 36  | 7.65   | 9.94   | 7.29   | 10.66  |
| Q3THS6 | S-adenosylmethionine synthase isoform type-2                              | 360  | 5  | 52   | 407  | 0.1693 | -2.14 | 7   | 2.13   | 2.12   | 2.57   | 0.00   | 15  | 2.29   | 2.48   | 6.56   | 3.28   |
| Q9CZU6 | Citrate synthase, mitochondrial                                           | 1240 | 18 | 797  | 49   | 0.0662 | -2.02 | 130 | 37.30  | 45.56  | 37.66  | 9.70   | 263 | 55.81  | 96.90  | 58.34  | 51.67  |
| P08553 | Neurofilament medium polypeptide                                          | 1552 | 22 | 1322 | 692  | 0.6104 | -1.07 | 252 | 51.15  | 71.00  | 73.60  | 56.59  | 271 | 64.98  | 53.00  | 81.68  | 71.35  |
| Q8JZNS | Acyl-CoA dehydrogenase family member 9, mitochondrial                     | 706  | 12 | 70   | 932  | 0.4494 | -1.84 | 11  | 3.20   | 5.30   | 2.57   | 0.00   | 20  | 5.35   | 1.66   | 4.38   | 9.02   |
| Q60930 | Voltage-dependent anion-selective channel protein 2                       | 885  | 13 | 1018 | 683  | 0.6265 | -1.18 | 213 | 57.55  | 71.00  | 66.76  | 17.78  | 251 | 48.17  | 48.86  | 61.99  | 91.85  |
| Q61879 | Myosin-10                                                                 | 3636 | 52 | 1649 | 414  | 0.3570 | 1.21  | 449 | 87.38  | 104.90 | 116.39 | 140.66 | 372 | 107.03 | 80.33  | 108.66 | 76.27  |
| P56399 | Ubiquitin carboxyl-terminal hydrolase 5                                   | 963  | 13 | 451  | 210  | 0.1814 | -1.71 | 72  | 3.20   | 18.01  | 37.66  | 12.93  | 123 | 25.99  | 21.53  | 35.73  | 39.36  |
| Q8K0U4 | Heat shock 70 kDa protein 12A                                             | 1324 | 18 | 717  | 966  | 0.9824 | 1.02  | 179 | 36.23  | 36.03  | 47.07  | 59.82  | 175 | 51.22  | 41.41  | 40.11  | 42.64  |
| O35098 | Dihydropyrimidinase-related protein 4                                     | 820  | 13 | 694  | 1197 | 0.8807 | 1.12  | 177 | 45.82  | 74.17  | 47.07  | 9.70   | 158 | 40.52  | 45.55  | 26.25  | 45.92  |
| Q8C522 | Endonuclease domain-containing 1 protein                                  | 218  | 3  | 33   | 769  | 0.1108 | 12.63 | 9   | 4.26   | 0.00   | 1.71   | 3.23   | 1   | 0.00   | 0.00   | 0.73   | 0.00   |
| P62192 | 26S protease regulatory subunit 4                                         | 326  | 5  | 34   | 1533 | 0.9719 | 1.12  | 7   | 1.07   | 4.24   | 1.71   | 0.00   | 6   | 1.53   | 0.00   | 1.46   | 3.28   |
| P50516 | V-type proton ATPase catalytic subunit A                                  | 3029 | 42 | 2565 | 290  | 0.3099 | 1.34  | 799 | 170.51 | 169.54 | 185.72 | 273.23 | 597 | 188.07 | 178.89 | 125.43 | 104.97 |
| Q99PT1 | Rho GDP-dissociation inhibitor 1                                          | 786  | 11 | 778  | 393  | 0.2821 | 1.15  | 221 | 58.61  | 55.10  | 42.79  | 64.67  | 193 | 60.40  | 53.00  | 38.65  | 41.00  |
| P62264 | 40S ribosomal protein S14                                                 | 382  | 6  | 196  | 625  | 0.2341 | 1.57  | 69  | 14.92  | 15.89  | 13.69  | 24.25  | 44  | 3.06   | 14.08  | 17.50  | 9.02   |
| P48758 | Carbonyl reductase [NADPH] 1                                              | 826  | 12 | 559  | 472  | 0.2406 | 1.12  | 151 | 29.84  | 40.27  | 30.81  | 50.12  | 135 | 32.11  | 38.10  | 25.52  | 39.36  |
| Q8R366 | Immunoglobulin superfamily member 8                                       | 453  | 7  | 234  | 667  | 0.5878 | 1.34  | 71  | 15.99  | 21.19  | 7.70   | 25.87  | 53  | 16.82  | 12.42  | 16.04  | 7.38   |
| Q9CZ04 | COP9 signalosome complex subunit 7a                                       | 410  | 6  | 90   | 1034 | 0.4095 | -1.15 | 23  | 4.26   | 6.36   | 0.86   | 11.32  | 26  | 8.41   | 9.11   | 2.19   | 6.56   |
| Q9QYGO | Protein NDRG2                                                             | 952  | 13 | 560  | 1043 | 0.3630 | -1.17 | 110 | 21.31  | 51.92  | 36.80  | 0.00   | 129 | 34.40  | 49.69  | 29.17  | 15.58  |
| Q9CQ92 | Mitochondrial fission 1 protein                                           | 331  | 5  | 188  | 973  | 0.7161 | -1.05 | 53  | 17.05  | 11.66  | 8.56   | 16.17  | 56  | 14.53  | 15.74  | 14.58  | 11.48  |
| P97315 | Cysteine and glycine-rich protein 1                                       | 422  | 6  | 319  | 390  | 0.1804 | -1.73 | 52  | 12.79  | 16.95  | 18.83  | 3.23   | 90  | 24.46  | 24.02  | 18.23  | 22.96  |
| P51881 | ADP/ATP translocase 2                                                     | 613  | 10 | 794  | 556  | 0.4868 | 1.15  | 209 | 45.82  | 72.06  | 41.08  | 50.12  | 181 | 42.05  | 39.75  | 44.48  | 54.95  |
| P97370 | Sodium/potassium-transporting ATPase subunit beta-3                       | 257  | 4  | 60   | 159  | 0.0171 | -3.73 | 5   | 2.13   | 0.00   | 2.57   | 0.00   | 18  | 5.35   | 3.31   | 8.02   | 0.82   |
| P97372 | Proteasome activator complex subunit 2                                    | 134  | 2  | 38   | 293  | 0.1570 | 1.62  | 11  | 2.13   | 3.18   | 4.28   | 1.62   | 7   | 1.53   | 0.83   | 2.92   | 1.64   |
| P62880 | Guanine nucleotide-binding protein G(I)/G(S)/G(T) subunit beta-2          | 686  | 10 | 655  | 606  | 0.3792 | -1.56 | 122 | 35.17  | 38.15  | 48.78  | 0.00   | 191 | 48.17  | 33.96  | 44.48  | 63.97  |
| P16330 | 2',3'-cyclic-nucleotide 3'-phosphodiesterase                              | 1533 | 23 | 1751 | 415  | 0.2547 | -1.20 | 290 | 54.35  | 113.38 | 67.61  | 54.97  | 350 | 53.52  | 105.18 | 105.74 | 85.29  |
| P50580 | Proliferation-associated protein 2G4                                      | 185  | 3  | 56   | 1406 | 0.8220 | 1.37  | 16  | 2.13   | 11.66  | 2.57   | 0.00   | 12  | 4.59   | 0.83   | 6.56   | 0.00   |
| P50396 | Rab GDP dissociation inhibitor alpha                                      | 2279 | 31 | 2045 | 735  | 0.6141 | 1.05  | 579 | 128.95 | 146.23 | 156.62 | 147.12 | 553 | 123.85 | 182.20 | 121.05 | 126.29 |
| Q9QZB7 | Actin-related protein 10                                                  | 244  | 3  | 14   | 822  | 0.0908 | -3.78 | 0   | 0.00   | 0.00   | 0.00   | 0.00   | 4   | 0.76   | 0.83   | 2.19   | 0.00   |
| Q60692 | Proteasome subunit beta type-6                                            | 365  | 6  | 96   | 759  | 0.3648 | 1.10  | 34  | 8.53   | 8.48   | 7.70   | 9.70   | 31  | 6.88   | 9.11   | 8.02   | 7.38   |
| Q9WV55 | Vesicle-associated membrane protein-associated protein A                  | 265  | 4  | 107  | 1389 | 0.8891 | -1.00 | 28  | 5.33   | 4.24   | 5.14   | 12.93  | 28  | 7.65   | 9.94   | 4.38   | 5.74   |
| P17182 | Alpha-enolase                                                             | 1557 | 21 | 2204 | 77   | 0.0831 | -1.59 | 415 | 89.52  | 161.06 | 122.39 | 42.04  | 658 | 128.44 | 232.72 | 159.71 | 136.95 |
| Q8VEH5 | EPM2A-interacting protein 1                                               | 336  | 6  | 55   | 797  | 0.4116 | -1.19 | 12  | 1.07   | 5.30   | 5.99   | 0.00   | 15  | 4.59   | 3.31   | 4.38   | 2.46   |
| P25444 | 40S ribosomal protein S2                                                  | 385  | 6  | 148  | 237  | 0.0814 | 1.63  | 48  | 12.79  | 9.54   | 9.41   | 16.17  | 29  | 3.82   | 6.63   | 6.56   | 12.30  |
| Q6NXX7 | Inactive dipeptidyl peptidase 10                                          | 309  | 5  | 103  | 1370 | 0.7610 | 1.15  | 25  | 2.13   | 5.30   | 14.55  | 3.23   | 22  | 5.35   | 0.83   | 11.67  | 4.10   |
| Q9D2M8 | Ubiquitin-conjugating enzyme E2 variant 2                                 | 313  | 5  | 86   | 1387 | 0.9553 | -1.03 | 24  | 1.07   | 1.06   | 7.70   | 14.55  | 25  | 10.70  | 4.97   | 9.48   | 0.00   |
| Q8QZT1 | Acetyl-CoA acetyltransferase, mitochondrial                               | 953  | 14 | 756  | 880  | 0.3316 | -1.38 | 141 | 27.71  | 79.47  | 33.38  | 0.00   | 193 | 29.82  | 85.30  | 43.75  | 34.44  |
| Q9R0P3 | S-formylglutathione hydrolase                                             | 624  | 9  | 324  | 1039 | 0.5482 | 1.11  | 98  | 22.38  | 21.19  | 31.67  | 22.63  | 88  | 16.06  | 15.74  | 16.04  | 40.18  |
| P45591 | Cofilin-2                                                                 | 303  | 5  | 245  | 333  | 0.1834 | -1.40 | 57  | 20.25  | 9.54   | 16.26  | 11.32  | 80  | 19.88  | 10.77  | 23.34  | 26.24  |
| P35486 | Pyruvate dehydrogenase E1 component subunit alpha, somatic form, 1        | 954  | 13 | 702  | 944  | 0.4642 | -1.12 | 140 | 40.50  | 58.28  | 39.37  | 1.62   | 157 | 26.76  | 69.57  | 38.65  | 22.14  |
| P61924 | Coatomer subunit zeta-1                                                   | 310  | 5  | 55   | 952  | 0.6918 | -1.54 | 16  | 6.39   | 5.30   | 2.57   | 1.62   | 24  | 0.76   | 7.45   | 8.02   | 8.20   |
| O35678 | Monoglyceride lipase                                                      | 454  | 7  | 115  | 1025 | 0.6799 | -1.39 | 25  | 11.72  | 5.30   | 4.28   | 3.23   | 34  | 13.76  | 4.14   | 2.19   | 13.94  |
| P10649 | Glutathione S-transferase Mu 1                                            | 1259 | 18 | 1237 | 643  | 0.5168 | -1.16 | 281 | 102.30 | 66.76  | 85.58  | 25.87  | 324 | 136.09 | 62.11  | 61.26  | 64.79  |
| Q812A2 | SLIT-ROBO Rho GTPase-activating protein 3                                 | 276  | 4  | 8    | 646  | 0.0580 | -2.31 | 0   | 0.00   | 0.00   | 0.00   | 0.00   | 2   | 0.76   | 0.00   | 0.73   | 0.82   |
| P62307 | Small nuclear ribonucleoprotein F                                         | 124  | 2  | 21   | 1516 | 0.9042 | -1.37 | 1   | 1.07   | 0.00   | 0.00   | 0.00   | 1   | 0.00   | 0.00   | 1.46   | 0.00   |
| P07901 | Heat shock protein HSP 90-alpha                                           | 2298 | 31 | 1642 | 925  | 0.9510 | 1.12  | 427 | 42.63  | 109.14 | 108.69 | 166.52 | 380 | 85.63  | 89.44  | 89.70  | 115.63 |
| P35700 | Peroxisomal protein PEX1                                                  | 703  | 12 | 564  | 1002 | 0.9175 | -1.03 | 158 | 44.76  | 30.73  | 40.22  | 42.04  | 163 | 35.17  | 53.83  | 43.03  | 31.16  |
| P08249 | Malate dehydrogenase, mitochondrial                                       | 1685 | 21 | 2601 | 471  | 0.3626 | -1.67 | 460 | 138.54 | 194.97 | 119.82 | 6.47   | 769 | 158.26 | 206.22 | 120.33 | 283.75 |
| Q9ES97 | Reticulon-3                                                               | 370  | 6  | 204  | 824  | 0.5733 | -1.13 | 52  | 10.66  | 27.55  | 10.27  | 3.23   | 58  | 15.29  | 9.94   | 16.04  | 17.22  |
| Q80TZ3 | Putative tyrosine-protein phosphatase auxilin                             | 273  | 5  | 92   | 361  | 0.0662 | -4.69 | 9   | 3.20   | 1.06   | 5.14   | 0.00   | 44  | 15.29  | 8.28   | 6.56   | 13.94  |
| P97797 | Tyrosine-protein phosphatase non-receptor type substrate 1                | 501  | 8  | 290  | 594  | 0.2669 | -1.28 | 45  | 8.53   | 7.42   | 11.13  | 17.78  | 58  | 7.65   | 9.94   | 21.15  | 18.86  |
| P97807 | Fumarate hydratase, mitochondrial                                         | 1053 | 15 | 514  | 660  | 0.2274 | -1.30 | 106 | 22.38  | 49.80  | 27.39  | 6.47   | 138 | 38.    |        |        |        |

|        |                                                                         |       |     |      |      |        |       |      |        |        |        |         |      |        |        |        |        |
|--------|-------------------------------------------------------------------------|-------|-----|------|------|--------|-------|------|--------|--------|--------|---------|------|--------|--------|--------|--------|
| Q60864 | Stress-induced-phosphoprotein 1                                         | 750   | 12  | 266  | 132  | 0.0370 | 1.89  | 94   | 23.44  | 30.73  | 25.68  | 14.55   | 50   | 19.11  | 15.74  | 10.94  | 4.10   |
| P62754 | 40S ribosomal protein S6                                                | 410   | 6   | 115  | 790  | 0.3574 | 1.47  | 38   | 9.59   | 8.48   | 3.42   | 16.17   | 26   | 4.59   | 11.59  | 3.65   | 5.74   |
| O88485 | Cytoplasmic dynein 1 intermediate chain 1                               | 495   | 7   | 169  | 1202 | 0.6808 | 1.13  | 47   | 19.18  | 4.24   | 13.69  | 9.70    | 41   | 14.53  | 4.97   | 9.48   | 12.30  |
| P42669 | Transcriptional activator protein Pur-alpha                             | 458   | 6   | 449  | 559  | 0.2103 | -1.46 | 85   | 22.38  | 24.37  | 35.09  | 3.23    | 124  | 27.52  | 39.75  | 35.73  | 21.32  |
| Q9CPU0 | Lactoylglutathione lyase                                                | 499   | 8   | 292  | 586  | 0.2713 | -1.50 | 63   | 28.77  | 7.42   | 20.54  | 6.47    | 95   | 34.40  | 14.91  | 15.31  | 30.34  |
| Q91VR2 | ATP synthase subunit gamma, mitochondrial                               | 712   | 10  | 616  | 657  | 0.4751 | -1.21 | 135  | 57.55  | 25.43  | 21.40  | 30.72   | 163  | 30.58  | 40.58  | 35.73  | 56.59  |
| Q9WUM5 | Succinyl-CoA ligase [GDP-forming] subunit alpha, mitochondrial          | 477   | 6   | 364  | 339  | 0.2296 | -1.48 | 71   | 23.44  | 16.95  | 21.40  | 9.70    | 106  | 22.94  | 32.30  | 20.42  | 30.34  |
| Q9DCT8 | Cysteine-rich protein 2                                                 | 173   | 3   | 114  | 1040 | 0.7213 | 1.10  | 33   | 10.66  | 8.48   | 9.41   | 4.85    | 30   | 9.17   | 3.31   | 8.02   | 9.84   |
| P46638 | Ras-related protein Rab-11B                                             | 129   | 2   | 93   | 311  | 0.2547 | -1.98 | 16   | 2.13   | 4.24   | 5.14   | 4.85    | 32   | 13.00  | 6.63   | 9.48   | 3.28   |
| P48453 | Serine/threonine-protein phosphatase 2B catalytic subunit beta isoform  | 334   | 5   | 96   | 806  | 0.5396 | -1.28 | 24   | 9.59   | 4.24   | 3.42   | 6.47    | 30   | 4.59   | 7.45   | 10.94  | 7.38   |
| Q9JKB1 | Ubiquitin carboxyl-terminal hydrolase isozyme L3                        | 251   | 4   | 84   | 1146 | 0.6382 | -1.18 | 26   | 9.59   | 1.06   | 8.56   | 6.47    | 30   | 9.17   | 9.94   | 8.02   | 3.28   |
| Q61735 | Leukocyte surface antigen CD47                                          | 232   | 3   | 223  | 394  | 0.1047 | -6.43 | 12   | 2.13   | 5.30   | 4.28   | 0.00    | 75   | 14.53  | 4.14   | 32.82  | 23.78  |
| Q80TJ1 | Calcium-dependent secretion activator 1                                 | 1867  | 28  | 684  | 828  | 0.7437 | -1.04 | 202  | 49.02  | 62.52  | 48.78  | 42.04   | 211  | 61.93  | 45.55  | 53.24  | 50.03  |
| Q9QZ06 | Toll-interacting protein                                                | 334   | 6   | 110  | 489  | 0.2747 | 1.46  | 39   | 12.79  | 8.48   | 5.14   | 12.93   | 27   | 5.35   | 9.11   | 5.83   | 6.56   |
| Q9Z0Y1 | Dynactin subunit 3                                                      | 286   | 5   | 93   | 219  | 0.0491 | -1.43 | 22   | 6.39   | 6.36   | 4.28   | 4.85    | 31   | 9.17   | 6.63   | 7.29   | 8.20   |
| Q9CPQ8 | ATP synthase subunit g, mitochondrial                                   | 458   | 5   | 334  | 1322 | 0.7077 | -1.22 | 40   | 24.51  | 1.06   | 4.28   | 9.70    | 48   | 4.59   | 11.59  | 26.98  | 4.92   |
| Q01768 | Nucleoside diphosphate kinase B                                         | 392   | 5   | 240  | 280  | 0.0661 | -2.23 | 43   | 7.46   | 10.60  | 5.14   | 19.40   | 95   | 25.23  | 22.36  | 26.25  | 21.32  |
| Q2PFD7 | PH and SEC7 domain-containing protein 3                                 | 196   | 3   | 112  | 761  | 0.3738 | -1.56 | 21   | 6.39   | 5.30   | 9.41   | 0.00    | 33   | 3.06   | 12.42  | 10.94  | 6.56   |
| P12970 | 60S ribosomal protein L7a                                               | 336   | 5   | 163  | 51   | 0.0248 | 2.69  | 54   | 14.92  | 14.83  | 9.41   | 14.55   | 20   | 2.29   | 5.80   | 3.65   | 8.20   |
| Q8R395 | COMM domain-containing protein 5                                        | 184   | 3   | 50   | 129  | 0.1549 | -2.22 | 9    | 3.20   | 0.00   | 5.99   | 0.00    | 20   | 6.12   | 5.80   | 4.38   | 4.10   |
| P67778 | Prohibitin                                                              | 843   | 10  | 627  | 379  | 0.3067 | 1.31  | 157  | 28.77  | 46.62  | 46.22  | 35.57   | 120  | 32.87  | 20.70  | 29.90  | 36.90  |
| P63028 | Translationally-controlled tumor protein                                | 438   | 6   | 354  | 145  | 0.0923 | -1.68 | 72   | 22.38  | 23.31  | 15.41  | 11.32   | 122  | 28.29  | 25.67  | 36.46  | 31.16  |
| Q9CQ65 | S-methyl-5'-thioadenosine phosphorylase                                 | 181   | 3   | 28   | 168  | 0.0136 | -3.31 | 4    | 2.13   | 0.00   | 0.00   | 1.62    | 12   | 6.12   | 0.83   | 2.19   | 3.28   |
| Q9R0Q6 | Actin-related protein 2/3 complex subunit 1A                            | 366   | 5   | 107  | 746  | 0.1982 | -1.75 | 16   | 3.20   | 7.42   | 5.14   | 0.00    | 28   | 3.82   | 9.94   | 13.86  | 0.00   |
| P08752 | Guanine nucleotide-binding protein G(i) subunit alpha-2                 | 796   | 12  | 275  | 989  | 0.3571 | -1.48 | 48   | 8.53   | 23.31  | 16.26  | 0.00    | 71   | 13.76  | 23.19  | 13.13  | 21.32  |
| Q9Z2Q6 | Septin-5                                                                | 668   | 11  | 373  | 750  | 0.2966 | -1.68 | 58   | 9.59   | 28.61  | 19.68  | 0.00    | 97   | 10.70  | 43.89  | 21.15  | 21.32  |
| Q9CWZ7 | Gamma-soluble NSF attachment protein                                    | 668   | 11  | 224  | 1101 | 0.3699 | -1.32 | 49   | 9.59   | 22.25  | 17.12  | 0.00    | 65   | 10.70  | 17.39  | 22.61  | 13.94  |
| Q9D0M5 | Dynein light chain 2, cytoplasmic                                       | 917   | 9   | 367  | 1339 | 0.7173 | -1.08 | 60   | 42.63  | 7.42   | 3.42   | 6.47    | 65   | 9.94   | 13.25  | 35.73  | 5.74   |
| P04370 | Myelin basic protein                                                    | 863   | 13  | 3243 | 789  | 0.6284 | -1.08 | 660  | 170.51 | 181.20 | 100.13 | 208.56  | 712  | 172.78 | 181.37 | 196.90 | 160.74 |
| Q9JJV2 | Profilin-2                                                              | 515   | 7   | 557  | 55   | 0.0794 | -1.68 | 113  | 33.04  | 28.61  | 18.83  | 32.33   | 190  | 48.93  | 36.44  | 58.34  | 45.92  |
| O88643 | Serine/threonine-protein kinase PAK 1                                   | 342   | 6   | 79   | 926  | 0.4119 | 1.32  | 22   | 7.46   | 7.42   | 4.28   | 3.23    | 17   | 4.59   | 6.63   | 0.00   | 5.74   |
| P56480 | ATP synthase subunit beta, mitochondrial                                | 3202  | 40  | 5653 | 388  | 0.2202 | -1.10 | 1277 | 320.77 | 375.11 | 312.38 | 268.38  | 1408 | 302.75 | 409.95 | 348.58 | 346.90 |
| O08547 | Vesicle-trafficking protein SEC22b                                      | 555   | 8   | 126  | 1225 | 0.9367 | 1.30  | 37   | 15.99  | 5.30   | 13.69  | 1.62    | 28   | 4.59   | 9.94   | 8.75   | 4.92   |
| Q9CQA3 | Succinate dehydrogenase [ubiquinone] iron-sulfur subunit, mitochondrial | 684   | 10  | 468  | 248  | 0.0854 | 1.24  | 128  | 37.30  | 23.31  | 28.24  | 38.80   | 103  | 24.46  | 21.53  | 21.15  | 36.08  |
| O88958 | Glucosamine-6-phosphate isomerase 1                                     | 201   | 3   | 16   | 1509 | 0.7312 | -1.27 | 5    | 0.00   | 0.00   | 0.00   | 4.85    | 6    | 4.59   | 0.83   | 0.73   | 0.00   |
| Q9DCZ4 | Apolipoprotein O                                                        | 321   | 5   | 155  | 597  | 0.2693 | -1.29 | 35   | 13.85  | 6.36   | 8.56   | 6.47    | 45   | 10.70  | 13.25  | 13.13  | 8.20   |
| P05201 | Aspartate aminotransferase, cytoplasmic                                 | 1258  | 18  | 1243 | 286  | 0.2233 | -1.92 | 198  | 66.07  | 75.23  | 54.77  | 1.62    | 380  | 65.75  | 143.28 | 99.91  | 71.35  |
| Q8C8R3 | Ankyrin-2                                                               | 3764  | 58  | 1611 | 934  | 0.8588 | 1.06  | 429  | 118.29 | 85.83  | 145.49 | 79.22   | 403  | 98.62  | 106.84 | 92.61  | 104.97 |
| Q9DCU2 | Plasmalogen                                                             | 274   | 3   | 311  | 176  | 0.1367 | 1.73  | 95   | 24.51  | 25.43  | 14.55  | 30.72   | 55   | 14.53  | 12.42  | 17.50  | 10.66  |
| P62962 | Profilin-1                                                              | 695   | 9   | 1059 | 579  | 0.4140 | -1.18 | 275  | 71.40  | 93.25  | 44.50  | 66.29   | 324  | 67.28  | 81.99  | 94.80  | 80.37  |
| Q9R1V6 | Disintegrin and metalloproteinase domain-containing protein 22          | 634   | 9   | 167  | 1161 | 0.5413 | 1.11  | 36   | 6.39   | 9.54   | 11.98  | 8.08    | 32   | 6.12   | 0.83   | 13.13  | 12.30  |
| Q62277 | Synaptophysin                                                           | 263   | 4   | 450  | 937  | 0.6883 | -1.07 | 101  | 20.25  | 36.03  | 25.68  | 19.40   | 108  | 16.82  | 29.81  | 32.09  | 29.52  |
| Q9D7X3 | Dual specificity protein phosphatase 3                                  | 693   | 10  | 321  | 308  | 0.2252 | -1.54 | 77   | 19.18  | 23.31  | 21.40  | 12.93   | 118  | 13.76  | 34.78  | 40.11  | 29.52  |
| Q04447 | Creatine kinase B-type                                                  | 1986  | 27  | 4448 | 16   | 0.0188 | -1.96 | 723  | 198.21 | 260.67 | 173.74 | 90.54   | 1416 | 383.79 | 431.48 | 303.37 | 297.69 |
| Q8VE22 | 28S ribosomal protein S23, mitochondrial                                | 162   | 3   | 25   | 1275 | 0.4192 | 3.75  | 9    | 4.26   | 0.00   | 4.28   | 0.00    | 2    | 0.00   | 0.00   | 1.46   | 0.82   |
| Q9DB77 | Cytochrome b-c1 complex subunit 2, mitochondrial                        | 1009  | 14  | 867  | 894  | 0.5243 | -1.14 | 178  | 38.36  | 80.53  | 55.63  | 3.23    | 202  | 22.94  | 79.51  | 55.42  | 44.28  |
| P68368 | Tubulin alpha-4A chain                                                  | 285   | 4   | 1080 | 827  | 0.7182 | 1.10  | 262  | 62.87  | 44.50  | 65.90  | 88.92   | 239  | 40.52  | 71.22  | 74.38  | 52.49  |
| Q9JIG8 | PRA1 family protein 2                                                   | 318   | 5   | 62   | 1040 | 0.6992 | -1.08 | 14   | 3.20   | 2.12   | 4.28   | 4.85    | 16   | 5.35   | 3.31   | 3.65   | 3.28   |
| P35290 | Ras-related protein Rab-24                                              | 215   | 3   | 21   | 1106 | 0.2763 | -8.99 | 1    | 1.07   | 0.00   | 0.00   | 0.00    | 10   | 0.00   | 0.83   | 2.19   | 6.56   |
| P70404 | Isocitrate dehydrogenase [NAD] subunit gamma, mitochondrial             | 720   | 11  | 365  | 741  | 0.2520 | -1.62 | 67   | 10.66  | 32.85  | 23.11  | 0.00    | 108  | 19.88  | 44.72  | 23.34  | 19.68  |
| P28474 | Alcohol dehydrogenase class-3                                           | 339   | 5   | 79   | 689  | 0.2124 | -5.13 | 4    | 1.07   | 0.00   | 3.42   | 0.00    | 23   | 4.59   | 14.08  | 4.38   | 0.00   |
| Q9CZ42 | Carbohydrate kinase domain-containing protein                           | 582   | 9   | 145  | 1030 | 0.5862 | -1.29 | 30   | 13.85  | 7.42   | 5.99   | 3.23    | 39   | 6.12   | 18.22  | 5.83   | 9.02   |
| Q9EPW0 | Type I inositol-3,4-bisphosphate 4-phosphatase                          | 320   | 5   | 68   | 784  | 0.2921 | -1.97 | 11   | 2.13   | 5.30   | 3.42   | 0.00    | 21   | 5.35   | 4.14   | 3.65   | 8.20   |
| Q9D1K2 | V-type proton ATPase subunit F                                          | 382   | 6   | 173  | 739  | 0.3034 | -2.34 | 9    | 8.53   | 0.00   | 0.00   | 0.00    | 20   | 3.82   | 6.63   | 9.48   | 0.00   |
| P35979 | 60S ribosomal protein L12                                               | 320   | 4   | 292  | 179  | 0.0436 | 1.46  | 94   | 24.51  | 23.31  | 24.82  | 21.02   | 64   | 13.76  | 13.25  | 23.34  | 13.94  |
| P15116 | Cadherin-2                                                              | 187   | 3   | 98   | 912  | 0.7493 | 1.73  | 24   | 8.53   | 6.36   | 9.41   | 0.00    | 14   | 2.29   | 0.83   | 4.38   | 6.56   |
| Q9D7N9 | Adipocyte plasma membrane-associated protein                            | 176   | 3   | 7    | 1488 | 0.7531 | -1.46 | 1    | 0.00   | 1.06   | 0.00   | 0.00    | 2    | 0.00   | 0.00   | 0.73   | 0.82   |
| Q3UU96 | Serine/threonine-protein kinase MRCK alpha                              | 209   | 4   | 20   | 424  | 0.0810 | -3.43 | 3    | 1.07   | 1.06   | 0.86   | 0.00    | 10   | 3.06   | 4.97   | 2.19   | 0.00   |
| Q9JHU4 | Cytoplasmic dynein 1 heavy chain 1                                      | 13471 | 204 | 7504 | 1220 | 0.9624 | 1.06  | 2201 | 467.83 | 298.82 | 423.64 | 1010.46 | 2082 | 883.79 | 445.56 | 408.38 | 344.44 |
| Q8R0A7 | Uncharacterized protein KIAA0513                                        | 156   | 2   | 29   | 376  | 0.1946 | 2.64  | 11   | 3.20   | 3.18   | 4.28   | 0.00    | 4    | 0.00   | 3.31   | 0.73   | 0.00   |
| Q9R0K7 | Plasma membrane calcium-transporting ATPase 2                           | 2426  | 33  | 2498 | 500  | 0.4121 | 1.16  | 650  | 187.56 | 118.68 | 148.06 | 195.63  | 560  | 135.32 | 123.40 | 176.48 | 124.65 |
| Q99KI0 | Aconitate hydratase, mitochondrial                                      | 2504  | 35  | 2781 | 989  | 0.9156 | 1.05  | 678  | 69.27  | 218.28 | 146.35 | 244.13  | 645  | 120.03 | 149.90 | 139.29 | 236.18 |
| Q60931 | Voltage-dependent anion-selective channel protein 3                     | 763   | 10  | 827  | 1005 | 0.8710 | 1.01  | 213  | 65.01  | 52.98  | 42.79  | 51.74   | 211  | 45.11  | 38.10  | 50.32  | 77.09  |
| P30275 | Creatine kinase U-type, mitochondrial                                   | 819   | 12  | 538  | 697  | 0.4449 | -1.14 | 112  | 21.31  | 65.70  | 24.82  | 0.00    | 127  | 21.41  | 34.78  | 35.00  | 36.08  |
| P63001 | Ras-related C3 botulinum toxin substrate 1                              | 297   | 5   | 266  | 1024 | 0.6977 | -1.00 | 86   | 19.18  | 27.55  | 8.56   | 30.72   | 86   | 19.88  | 25.67  | 17.50  | 22.96  |
| Q9R1P4 | Proteasome subunit alpha type-1                                         | 451   | 7   | 188  | 1170 | 0.9931 | 1.03  | 61   | 12.79  | 13.78  | 10.27  | 24.25   | 59   | 16.82  | 13.25  | 10.94  | 18.04  |
| Q6ZWN5 | 40S ribosomal protein S9                                                | 216   | 4   | 86   | 1049 | 0.7095 | 1.09  | 23   | 5.33   | 3.18   | 7.70   | 6.47    | 21   | 3.06   | 5.80   | 8.75   | 3.28   |
| Q3THE2 | Myosin regulatory light chain 12B                                       | 340   | 5   | 186  | 569  | 0.2121 | 1.68  | 62   | 18.12  | 13.78  | 13.69  | 16.17   | 37   | 2.29   | 7.45   | 13.13  | 13.94  |
| Q8VEM8 | Phosphate carrier protein, mitochondrial                                | 874   | 13  | 1647 | 243  | 0.1805 | 1.24  | 421  | 107.63 | 111.26 | 101.85 | 100.24  | 340  | 64.98  | 73.71  | 96.99  | 104.15 |
| P57759 | Endoplasmic reticulum resident protein 29                               | 606   | 9   | 163  | 1065 | 0.7706 | -1.11 | 39   | 9.59   | 7.42   | 13.69  | 8.08    | 43   | 16.82  | 10.77  | 8.02   | 7.38   |
| P14152 | Malate dehydrogenase, cytoplasmic                                       | 818   | 11  | 1281 | 366  | 0.3659 | -1.42 | 251  | 86.32  | 68.88  | 63.33  | 32.33   | 356  | 60.40  | 121.74 | 64.90  | 109.07 |
| Q9R1T4 | Septin-6                                                                | 401   | 7   | 229  | 1156 | 0.9224 | -1.02 | 58   | 12.79  | 16.95  | 13.69  | 14.55   | 59   | 13.00  |        |        |        |

|        |                                                                   |       |     |       |      |        |       |      |        |        |        |         |      |        |        |        |        |
|--------|-------------------------------------------------------------------|-------|-----|-------|------|--------|-------|------|--------|--------|--------|---------|------|--------|--------|--------|--------|
| Q9Z1Z2 | Serine-threonine kinase receptor-associated protein               | 360   | 5   | 52    | 157  | 0.0631 | -8.86 | 3    | 0.00   | 0.00   | 2.57   | 0.00    | 23   | 6.88   | 9.94   | 5.10   | 0.82   |
| O88935 | Synapsin-1                                                        | 1884  | 26  | 3250  | 104  | 0.0210 | 1.24  | 974  | 228.05 | 271.27 | 242.20 | 232.81  | 784  | 158.26 | 218.64 | 207.11 | 200.10 |
| Q9WTP7 | GTP:AMP phosphotransferase, mitochondrial                         | 518   | 8   | 238   | 641  | 0.4484 | 1.15  | 67   | 21.31  | 11.66  | 19.68  | 14.55   | 58   | 15.29  | 15.74  | 17.50  | 9.84   |
| Q9DBG3 | AP-2 complex subunit beta                                         | 1472  | 21  | 1096  | 197  | 0.2016 | -1.56 | 198  | 30.90  | 63.58  | 74.46  | 29.10   | 309  | 84.86  | 60.46  | 73.65  | 90.21  |
| P84104 | Splicing factor, arginine/serine-rich 3                           | 176   | 3   | 93    | 1364 | 0.8863 | 1.04  | 26   | 8.53   | 4.24   | 11.98  | 1.62    | 25   | 6.88   | 6.63   | 2.92   | 9.02   |
| Q9D8N0 | Elongation factor 1-gamma                                         | 498   | 8   | 150   | 223  | 0.0694 | -3.45 | 13   | 4.26   | 3.18   | 5.99   | 0.00    | 46   | 12.23  | 11.59  | 10.21  | 12.30  |
| Q9D2R6 | Coiled-coil domain-containing protein 56                          | 183   | 3   | 26    | 774  | 0.1456 | -2.20 | 4    | 0.00   | 1.06   | 0.86   | 1.62    | 8    | 2.29   | 1.66   | 2.19   | 1.64   |
| P62242 | 40S ribosomal protein S8                                          | 294   | 4   | 188   | 395  | 0.1783 | 1.45  | 56   | 20.25  | 12.72  | 13.69  | 9.70    | 39   | 12.23  | 11.59  | 5.10   | 9.84   |
| P11499 | Heat shock protein HSP 90-beta                                    | 1319  | 19  | 1152  | 927  | 0.8055 | 1.05  | 302  | 23.44  | 90.07  | 83.87  | 105.09  | 287  | 45.87  | 78.68  | 70.01  | 92.67  |
| Q91VD9 | NADH-ubiquinone oxidoreductase 75 kDa subunit, mitochondrial      | 2119  | 30  | 1056  | 207  | 0.1725 | 1.45  | 310  | 50.09  | 60.40  | 77.03  | 122.87  | 215  | 50.46  | 47.21  | 62.72  | 54.13  |
| P35282 | Ras-related protein Rab-21                                        | 386   | 5   | 118   | 802  | 0.3966 | -1.17 | 31   | 10.66  | 4.24   | 9.41   | 6.47    | 36   | 8.41   | 9.11   | 9.48   | 9.02   |
| P24369 | Peptidyl-prolyl cis-trans isomerase B                             | 429   | 7   | 160   | 534  | 0.2837 | -1.42 | 37   | 13.85  | 10.60  | 7.70   | 4.85    | 52   | 10.70  | 13.25  | 21.15  | 7.38   |
| P84091 | AP-2 complex subunit mu                                           | 718   | 12  | 367   | 1088 | 0.8052 | -1.01 | 90   | 11.72  | 26.49  | 29.10  | 22.63   | 91   | 22.17  | 28.16  | 21.88  | 18.86  |
| Q9EQF6 | Dihydropyrimidinase-related protein 5                             | 646   | 10  | 179   | 548  | 0.1474 | 1.56  | 59   | 8.53   | 20.13  | 13.69  | 16.17   | 37   | 9.17   | 16.56  | 5.10   | 6.56   |
| P18872 | Guanine nucleotide-binding protein G(o) subunit alpha             | 1676  | 25  | 1382  | 838  | 0.4429 | -1.15 | 271  | 50.09  | 134.57 | 61.62  | 24.25   | 312  | 84.86  | 88.62  | 58.34  | 80.37  |
| Q9QUM9 | Proteasome subunit alpha type-6                                   | 592   | 8   | 303   | 981  | 0.7910 | 1.09  | 95   | 25.58  | 16.95  | 18.83  | 33.95   | 88   | 18.35  | 32.30  | 18.23  | 18.86  |
| Q9CZ13 | Cytochrome b-c1 complex subunit 1, mitochondrial                  | 1051  | 13  | 996   | 1028 | 0.9236 | 1.02  | 234  | 58.61  | 94.31  | 53.92  | 27.48   | 230  | 32.87  | 71.22  | 66.36  | 59.87  |
| Q9JJK2 | LanC-like protein 2                                               | 562   | 9   | 153   | 808  | 0.1572 | -1.49 | 29   | 6.39   | 16.95  | 5.99   | 0.00    | 44   | 12.23  | 12.42  | 17.50  | 1.64   |
| Q06185 | ATP synthase subunit e, mitochondrial                             | 348   | 4   | 274   | 1451 | 0.7965 | -1.19 | 28   | 19.18  | 0.00   | 0.86   | 8.08    | 33   | 2.29   | 2.48   | 26.25  | 2.46   |
| Q9QXS1 | Plectin                                                           | 8582  | 127 | 3377  | 993  | 0.9699 | 1.07  | 868  | 209.94 | 104.90 | 203.69 | 349.21  | 814  | 228.59 | 203.73 | 222.42 | 159.10 |
| Q9WTL7 | Acyl-protein thioesterase 2                                       | 420   | 6   | 164   | 929  | 0.5109 | -1.41 | 35   | 7.46   | 10.60  | 15.41  | 1.62    | 49   | 21.41  | 8.28   | 6.56   | 13.12  |
| P17183 | Gamma-enolase                                                     | 1809  | 24  | 2357  | 191  | 0.1095 | -1.96 | 402  | 120.42 | 149.41 | 109.55 | 22.63   | 787  | 178.13 | 251.77 | 185.23 | 171.40 |
| Q7TPR4 | Alpha-actinin-1                                                   | 1079  | 16  | 508   | 1276 | 0.7027 | -1.16 | 102  | 6.39   | 38.15  | 47.93  | 9.70    | 118  | 22.17  | 9.11   | 38.65  | 48.38  |
| Q64433 | 10 kDa heat shock protein, mitochondrial                          | 351   | 5   | 331   | 775  | 0.1944 | -1.65 | 32   | 19.18  | 2.12   | 4.28   | 6.47    | 53   | 11.47  | 8.28   | 18.23  | 14.76  |
| P08551 | Neurofilament light polypeptide                                   | 1736  | 27  | 1759  | 453  | 0.3543 | 1.15  | 385  | 99.11  | 76.29  | 84.73  | 124.49  | 335  | 103.21 | 70.40  | 84.59  | 77.09  |
| P19157 | Glutathione S-transferase P 1                                     | 688   | 11  | 799   | 442  | 0.2997 | -1.12 | 204  | 47.96  | 51.92  | 50.49  | 53.35   | 228  | 57.34  | 46.38  | 67.09  | 57.41  |
| Q9JIS5 | Synaptic vesicle glycoprotein 2A                                  | 676   | 10  | 490   | 888  | 0.7061 | -1.09 | 120  | 23.44  | 39.21  | 35.09  | 22.63   | 132  | 35.17  | 22.36  | 43.03  | 31.16  |
| P62627 | Dynein light chain roadblock-type 1                               | 253   | 4   | 65    | 1414 | 0.7696 | 2.92  | 6    | 6.39   | 0.00   | 0.00   | 0.00    | 2    | 0.00   | 0.00   | 2.19   | 0.00   |
| P19783 | Cytochrome c oxidase subunit 4 isoform 1, mitochondrial           | 651   | 9   | 1173  | 800  | 0.7093 | 1.05  | 304  | 83.12  | 74.17  | 64.19  | 82.45   | 291  | 67.28  | 55.49  | 86.05  | 82.01  |
| Q9CXW3 | Calcyclin-binding protein                                         | 223   | 4   | 83    | 427  | 0.1944 | -2.23 | 13   | 4.26   | 2.12   | 3.42   | 3.23    | 29   | 6.88   | 12.42  | 7.29   | 2.46   |
| Q64105 | Sepiapterin reductase                                             | 969   | 13  | 383   | 484  | 0.3233 | -1.35 | 75   | 29.84  | 10.60  | 17.97  | 16.17   | 101  | 35.93  | 30.64  | 20.42  | 13.94  |
| Q9CQ75 | NADH dehydrogenase [ubiquinone] 1 alpha subcomplex subunit 2      | 239   | 4   | 129   | 1449 | 0.8052 | 1.05  | 13   | 8.53   | 1.06   | 0.00   | 3.23    | 12   | 1.53   | 1.66   | 6.56   | 2.46   |
| P11798 | Calcium/calmodulin-dependent protein kinase type II subunit alpha | 858   | 11  | 2147  | 707  | 0.4772 | 1.08  | 534  | 126.81 | 100.67 | 139.50 | 166.52  | 495  | 84.10  | 86.13  | 180.85 | 144.33 |
| P17742 | Peptidyl-prolyl cis-trans isomerase A                             | 1382  | 19  | 2957  | 778  | 0.7081 | 1.06  | 855  | 246.17 | 209.81 | 187.43 | 211.79  | 809  | 142.97 | 236.86 | 239.92 | 189.44 |
| Q8BZ98 | Dynamin-3                                                         | 702   | 11  | 259   | 713  | 0.2961 | -1.51 | 46   | 1.07   | 15.89  | 17.97  | 11.32   | 70   | 12.23  | 19.05  | 11.67  | 27.06  |
| Q9DCB8 | Iron-sulfur cluster assembly 2 homolog, mitochondrial             | 495   | 7   | 65    | 7    | 0.0231 | -6.76 | 4    | 3.20   | 1.06   | 0.00   | 0.00    | 29   | 7.65   | 5.80   | 8.75   | 6.56   |
| O89053 | Coronin-1A                                                        | 342   | 5   | 182   | 1056 | 0.8325 | 1.16  | 54   | 13.85  | 6.36   | 11.13  | 22.63   | 47   | 9.17   | 18.22  | 9.48   | 9.84   |
| P14873 | Microtubule-associated protein 1B                                 | 2764  | 42  | 1532  | 324  | 0.2536 | -1.34 | 324  | 89.52  | 77.35  | 85.58  | 71.14   | 434  | 85.63  | 156.53 | 81.68  | 109.89 |
| P49442 | Inositol polyphosphate 1-phosphatase                              | 268   | 4   | 52    | 688  | 0.3525 | -3.54 | 5    | 2.13   | 2.12   | 0.86   | 0.00    | 18   | 0.76   | 10.77  | 6.56   | 0.00   |
| P62317 | Small nuclear ribonucleoprotein Sm D2                             | 335   | 5   | 118   | 546  | 0.1963 | -1.26 | 27   | 10.66  | 5.30   | 3.42   | 8.08    | 35   | 9.17   | 7.45   | 7.29   | 10.66  |
| P70296 | Phosphatidylethanolamine-binding protein 1                        | 986   | 12  | 1401  | 346  | 0.2307 | -1.16 | 338  | 102.30 | 57.22  | 94.14  | 84.07   | 390  | 111.62 | 71.22  | 86.05  | 121.37 |
| Q8CFV4 | Neuritin                                                          | 196   | 3   | 7     | 1527 | 0.3910 | -0.73 | 0    | 0.00   | 0.00   | 0.00   | 0.00    | 1    | 0.00   | 0.00   | 0.73   | 0.00   |
| Q80UG2 | Plexin-A4                                                         | 218   | 4   | 6     | 1325 | 0.3910 | -2.19 | 0    | 0.00   | 0.00   | 0.00   | 0.00    | 2    | 0.00   | 0.00   | 2.19   | 0.00   |
| P60487 | Pyridoxal phosphate phosphatase                                   | 1012  | 14  | 478   | 811  | 0.6725 | -1.16 | 118  | 40.50  | 16.95  | 29.95  | 30.72   | 137  | 47.40  | 38.92  | 17.50  | 32.80  |
| Q8VDN2 | Sodium/potassium-transporting ATPase subunit alpha-1              | 1729  | 22  | 2819  | 227  | 0.1851 | 1.30  | 781  | 154.52 | 202.39 | 159.19 | 265.14  | 601  | 144.50 | 135.82 | 167.73 | 152.54 |
| O54946 | DnaJ homolog subfamily B member 6                                 | 139   | 2   | 31    | 395  | 0.4745 | 2.55  | 16   | 2.13   | 0.00   | 2.57   | 11.32   | 6    | 1.53   | 0.83   | 1.46   | 2.46   |
| Q91V41 | Ras-related protein Rab-14                                        | 888   | 13  | 707   | 108  | 0.0813 | -1.51 | 154  | 50.09  | 30.73  | 42.79  | 30.72   | 233  | 50.46  | 49.69  | 64.17  | 68.89  |
| P56376 | Acylphosphatase-1                                                 | 186   | 3   | 99    | 1025 | 0.4815 | -1.61 | 9    | 8.53   | 0.00   | 0.00   | 0.00    | 14   | 0.76   | 4.14   | 8.02   | 0.82   |
| Q99N28 | Cell adhesion molecule 3                                          | 357   | 5   | 227   | 1279 | 0.7938 | -1.12 | 43   | 15.99  | 13.78  | 10.27  | 3.23    | 48   | 6.88   | 24.02  | 11.67  | 5.74   |
| P16546 | Spectrin alpha chain, brain                                       | 11758 | 167 | 12342 | 512  | 0.3968 | 1.14  | 3501 | 755.56 | 860.42 | 778.82 | 1105.85 | 3071 | 788.23 | 760.27 | 830.61 | 692.15 |
| Q62261 | Spectrin beta chain, brain 1                                      | 8771  | 126 | 7626  | 526  | 0.4000 | 1.24  | 2228 | 480.62 | 475.78 | 466.43 | 805.13  | 1799 | 425.08 | 480.35 | 519.95 | 373.96 |
| P56391 | Cytochrome c oxidase subunit 6B1                                  | 331   | 5   | 297   | 1416 | 0.7324 | -1.07 | 28   | 15.99  | 1.06   | 2.57   | 8.08    | 30   | 6.12   | 3.31   | 16.04  | 4.10   |
| O55022 | Membrane-associated progesterone receptor component 1             | 322   | 5   | 160   | 1308 | 0.8436 | 1.39  | 40   | 19.18  | 6.36   | 14.55  | 0.00    | 29   | 10.70  | 4.97   | 6.56   | 6.56   |
| P63037 | DnaJ homolog subfamily A member 1                                 | 146   | 2   | 25    | 1079 | 0.1831 | 3.69  | 6    | 0.00   | 3.18   | 2.57   | 0.00    | 2    | 0.00   | 0.83   | 0.73   | 0.00   |
| Q9ERD7 | Tubulin beta-3 chain                                              | 881   | 13  | 1345  | 641  | 0.4322 | 1.04  | 332  | 76.73  | 87.95  | 79.59  | 87.30   | 318  | 68.04  | 77.85  | 86.78  | 85.29  |
| Q64332 | Synapsin-2                                                        | 874   | 13  | 1157  | 259  | 0.1321 | 1.14  | 326  | 79.93  | 95.37  | 94.14  | 56.59   | 285  | 82.57  | 72.05  | 80.22  | 50.03  |
| P47802 | Metaxin-1                                                         | 250   | 4   | 22    | 1436 | 0.6475 | -1.48 | 2    | 0.00   | 2.12   | 0.00   | 0.00    | 3    | 0.76   | 0.00   | 0.73   | 1.64   |
| P46460 | Vesicle-fusing ATPase                                             | 2416  | 35  | 2254  | 643  | 0.4818 | 1.14  | 587  | 124.68 | 109.14 | 136.93 | 216.64  | 516  | 133.03 | 118.43 | 124.70 | 139.41 |
| Q9D1G5 | Leucine-rich repeat-containing protein 57                         | 149   | 2   | 64    | 401  | 0.2556 | 1.62  | 24   | 7.46   | 5.30   | 4.28   | 6.47    | 15   | 0.76   | 8.28   | 2.19   | 3.28   |
| Q91Z61 | GTP-binding protein Di-Ras1                                       | 168   | 3   | 15    | 446  | 0.0199 | -8.02 | 0    | 0.00   | 0.00   | 0.00   | 0.00    | 8    | 1.53   | 1.66   | 0.73   | 4.10   |
| Q9D898 | Actin-related protein 2/3 complex subunit 5-like protein          | 288   | 4   | 154   | 808  | 0.4376 | 1.20  | 48   | 9.59   | 9.54   | 11.13  | 17.78   | 40   | 6.12   | 12.42  | 11.67  | 9.84   |
| P33173 | Kinesin-like protein KIF1A                                        | 649   | 10  | 100   | 915  | 0.3112 | -1.58 | 23   | 5.33   | 1.06   | 13.69  | 3.23    | 37   | 14.53  | 9.94   | 6.56   | 5.74   |
| Q9JLZ3 | Methylglutaconyl-CoA hydratase, mitochondrial                     | 431   | 7   | 214   | 327  | 0.1970 | 1.30  | 66   | 14.92  | 20.13  | 12.84  | 17.78   | 51   | 13.00  | 12.42  | 14.58  | 10.66  |
| Q9D0M3 | Cytochrome c1, heme protein, mitochondrial                        | 1442  | 17  | 909   | 100  | 0.0276 | 1.27  | 241  | 59.68  | 60.40  | 60.76  | 59.82   | 189  | 53.52  | 42.24  | 43.03  | 50.03  |
| Q9DAS9 | Guanine nucleotide-binding protein G(I)/G(S)/G(O) subunit gamma-1 | 249   | 4   | 63    | 1351 | 0.6838 | 4.38  | 6    | 6.39   | 0.00   | 0.00   | 0.00    | 1    | 0.00   | 0.00   | 1.46   | 0.00   |
| Q9Z0F7 | Gamma-synuclein                                                   | 251   | 4   | 126   | 160  | 0.0300 | -4.44 | 11   | 3.20   | 0.00   | 3.42   | 4.85    | 51   | 13.76  | 11.59  | 12.40  | 13.12  |
| P35802 | Neuronal membrane glycoprotein M6-a                               | 272   | 4   | 478   | 1117 | 0.9709 | -1.03 | 123  | 34.10  | 41.33  | 20.54  | 27.48   | 127  | 19.11  | 33.96  | 45.94  | 27.88  |
| O08599 | Syntaxin-binding protein 1                                        | 2792  | 39  | 3949  | 124  | 0.1120 | 1.36  | 1145 | 277.07 | 252.19 | 253.33 | 362.15  | 843  | 247.71 | 194.62 | 220.23 | 180.42 |
| O70439 | Syntaxin-7                                                        | 145   | 2   | 19    | 638  | 0.1316 | -3.75 | 1    | 1.07   | 0.00   | 0.00   | 0.00    | 4    | 1.53   | 0.83   | 0.00   | 1.64   |
| Q811D0 | Disks large homolog 1                                             | 503   | 8   | 112   | 1233 | 0.6700 | 1.10  | 31   | 4.26   | 8.48   | 8.56   | 9.70    | 28   | 7.65   | 2.48   | 5.83   | 12.30  |
| P43006 | Excitatory amino acid transporter 2                               | 1255  | 17  | 3238  | 332  | 0.1909 | 1.13  | 941  | 219.53 | 198.15 | 220.81 | 302.33  | 833  | 214.07 | 186.34 | 210.02 | 222.24 |
| Q61548 | Clathrin coat assembly protein AP180                              | 709   | 11  | 771   | 171  | 0.12   |       |      |        |        |        |         |      |        |        |        |        |

|        |                                                                     |      |    |      |      |        |       |     |        |        |        |        |     |        |        |        |        |
|--------|---------------------------------------------------------------------|------|----|------|------|--------|-------|-----|--------|--------|--------|--------|-----|--------|--------|--------|--------|
| P63168 | Dynein light chain 1, cytoplasmic                                   | 369  | 4  | 184  | 954  | 0.4622 | -1.76 | 18  | 11.72  | 1.06   | 3.42   | 1.62   | 31  | 3.82   | 9.94   | 16.04  | 1.64   |
| Q9CR16 | Peptidyl-prolyl cis-trans isomerase D                               | 377  | 6  | 65   | 187  | 0.0873 | -7.73 | 4   | 0.00   | 1.06   | 2.57   | 0.00   | 28  | 8.41   | 11.59  | 8.02   | 0.00   |
| P03930 | ATP synthase protein 8                                              | 123  | 2  | 73   | 710  | 0.3109 | -1.17 | 9   | 7.46   | 0.00   | 1.71   | 0.00   | 11  | 3.82   | 0.83   | 3.65   | 2.46   |
| P05064 | Fructose-bisphosphate aldolase A                                    | 1462 | 20 | 3063 | 351  | 0.1820 | -1.57 | 591 | 141.73 | 250.07 | 176.30 | 22.63  | 929 | 234.71 | 323.82 | 207.84 | 162.38 |
| Q9QXZ0 | Microtubule-actin cross-linking factor 1                            | 4311 | 68 | 653  | 1253 | 0.7502 | -1.20 | 150 | 27.71  | 8.48   | 35.95  | 77.60  | 179 | 81.04  | 49.69  | 34.27  | 13.94  |
| Q9EQ20 | Methylmalonate-semialdehyde dehydrogenase [acylating], mitochondr   | 624  | 10 | 152  | 891  | 0.4562 | 1.42  | 36  | 5.33   | 3.18   | 12.84  | 14.55  | 25  | 3.82   | 4.97   | 12.40  | 4.10   |
| Q8BWR2 | UPF0424 protein C1orf128 homolog                                    | 338  | 5  | 70   | 1399 | 0.9780 | 1.03  | 22  | 8.53   | 1.06   | 5.99   | 6.47   | 21  | 3.06   | 10.77  | 4.38   | 3.28   |
| Q8VBV7 | COP9 signalosome complex subunit 8                                  | 371  | 5  | 104  | 647  | 0.3403 | -1.76 | 16  | 3.20   | 3.18   | 5.99   | 3.23   | 27  | 10.70  | 1.66   | 10.21  | 4.92   |
| Q9JKK7 | Tropomodulin-2                                                      | 381  | 6  | 162  | 1000 | 0.2431 | -1.30 | 24  | 2.13   | 13.78  | 8.56   | 0.00   | 32  | 5.35   | 19.05  | 5.83   | 1.64   |
| Q7TMM9 | Tubulin beta-2A chain                                               | 165  | 2  | 354  | 1312 | 0.9001 | -1.02 | 81  | 20.25  | 18.01  | 13.69  | 29.10  | 83  | 20.64  | 9.94   | 36.46  | 15.58  |
| P61971 | Nuclear transport factor 2                                          | 243  | 4  | 36   | 651  | 0.1216 | -2.92 | 4   | 4.26   | 0.00   | 0.00   | 0.00   | 12  | 8.41   | 3.31   | 0.73   | 0.00   |
| Q61885 | Myelin-oligodendrocyte glycoprotein                                 | 693  | 10 | 1059 | 672  | 0.5037 | -1.13 | 217 | 70.33  | 52.98  | 61.62  | 32.33  | 245 | 56.57  | 48.86  | 78.03  | 61.51  |
| O35621 | Phosphomannomutase 1                                                | 252  | 4  | 24   | 950  | 0.2100 | -3.58 | 3   | 1.07   | 0.00   | 0.00   | 1.62   | 10  | 3.82   | 4.14   | 0.00   | 1.64   |
| Q3UIU2 | NADH dehydrogenase [ubiquinone] 1 beta subcomplex subunit 6         | 221  | 4  | 178  | 197  | 0.1209 | -2.01 | 30  | 10.66  | 4.24   | 4.28   | 11.32  | 61  | 13.00  | 13.25  | 21.88  | 13.12  |
| P02463 | Collagen alpha-1(IV) chain                                          | 323  | 5  | 35   | 109  | 0.0250 | 29.22 | 29  | 6.39   | 7.42   | 0.86   | 14.55  | 0   | 0.00   | 0.00   | 0.00   | 0.00   |
| Q8BG05 | Heterogeneous nuclear ribonucleoprotein A3                          | 822  | 12 | 440  | 312  | 0.1295 | -1.86 | 59  | 20.25  | 23.31  | 15.41  | 0.00   | 109 | 31.35  | 39.75  | 28.44  | 9.84   |
| Q9R257 | Heme-binding protein 1                                              | 639  | 9  | 264  | 1227 | 0.4563 | -1.10 | 63  | 30.90  | 13.78  | 17.97  | 0.00   | 69  | 24.46  | 15.74  | 14.58  | 13.94  |
| Q9CRY7 | Glycerophosphodiester phosphodiesterase domain-containing protein   | 140  | 2  | 8    | 1295 | 0.1820 | -1.59 | 0   | 0.00   | 0.00   | 0.00   | 0.00   | 2   | 0.76   | 0.83   | 0.00   | 0.00   |
| Q7TMF3 | NADH dehydrogenase [ubiquinone] 1 alpha subcomplex subunit 12       | 665  | 11 | 319  | 1210 | 0.8803 | 1.13  | 91  | 23.44  | 10.60  | 17.97  | 38.80  | 80  | 13.00  | 20.70  | 22.61  | 23.78  |
| P16054 | Protein kinase C epsilon type                                       | 371  | 6  | 44   | 1511 | 0.8116 | 1.13  | 10  | 0.00   | 3.18   | 1.71   | 4.85   | 9   | 1.53   | 1.66   | 2.19   | 3.28   |
| Q61206 | Platelet-activating factor acetylhydrolase 1B subunit beta          | 310  | 5  | 205  | 1235 | 0.8941 | 1.01  | 50  | 17.05  | 10.60  | 12.84  | 9.70   | 50  | 15.29  | 15.74  | 9.48   | 9.02   |
| P62827 | GTP-binding nuclear protein Ran                                     | 235  | 4  | 146  | 1250 | 0.8679 | 1.21  | 44  | 9.59   | 10.60  | 2.57   | 21.02  | 36  | 14.53  | 9.11   | 10.21  | 2.46   |
| Q9D1C8 | Vacuolar protein sorting-associated protein 28 homolog              | 404  | 7  | 37   | 1532 | 0.7785 | 1.04  | 10  | 6.39   | 0.00   | 3.42   | 0.00   | 9   | 0.76   | 0.83   | 2.92   | 4.92   |
| Q9CZR8 | Elongation factor Ts, mitochondrial                                 | 450  | 6  | 131  | 984  | 0.3856 | -1.18 | 33  | 6.39   | 4.24   | 5.99   | 16.17  | 39  | 8.41   | 10.77  | 8.75   | 10.66  |
| O55234 | Proteasome subunit beta type-5                                      | 1154 | 16 | 371  | 617  | 0.4413 | -1.30 | 106 | 30.90  | 27.55  | 15.41  | 32.33  | 138 | 36.70  | 25.67  | 48.13  | 27.06  |
| Q9CQV1 | Mitochondrial import inner membrane translocase subunit Tim16       | 156  | 2  | 46   | 1290 | 0.8085 | -1.11 | 13  | 6.39   | 1.06   | 2.57   | 3.23   | 15  | 3.06   | 0.83   | 5.10   | 5.74   |
| Q9CYR6 | Phosphoacetylglucosamine mutase                                     | 178  | 3  | 4    | 1503 | 0.3910 | 1.06  | 1   | 0.00   | 1.06   | 0.00   | 0.00   | 0   | 0.00   | 0.00   | 0.00   | 0.00   |
| Q78IK2 | Up-regulated during skeletal muscle growth protein 5                | 168  | 2  | 80   | 1271 | 0.7989 | -1.87 | 6   | 3.20   | 0.00   | 0.00   | 3.23   | 12  | 0.00   | 0.00   | 8.75   | 3.28   |
| O09061 | Proteasome subunit beta type-1                                      | 774  | 11 | 317  | 162  | 0.0263 | -1.46 | 68  | 23.44  | 11.66  | 23.11  | 9.70   | 99  | 27.52  | 19.05  | 33.55  | 18.86  |
| Q9D1E6 | Tubulin-folding cofactor B                                          | 217  | 3  | 48   | 212  | 0.0711 | 1.67  | 19  | 4.26   | 5.30   | 2.57   | 6.47   | 11  | 1.53   | 4.14   | 2.19   | 3.28   |
| P84096 | Rho-related GTP-binding protein RhoG                                | 570  | 8  | 364  | 744  | 0.4593 | -1.14 | 86  | 30.90  | 11.66  | 27.39  | 16.17  | 99  | 22.94  | 26.50  | 26.98  | 22.14  |
| P62259 | 14-3-3 protein epsilon                                              | 1904 | 26 | 2377 | 878  | 0.7855 | 1.01  | 634 | 154.52 | 152.59 | 147.21 | 179.46 | 629 | 168.96 | 139.96 | 136.37 | 183.70 |
| Q9R0Y5 | Adenylate kinase isoenzyme 1                                        | 780  | 11 | 618  | 35   | 0.0122 | -2.13 | 98  | 34.10  | 15.89  | 31.67  | 16.17  | 208 | 58.87  | 51.35  | 56.15  | 41.82  |
| Q9JIF7 | Coatamer subunit beta                                               | 241  | 4  | 9    | 1084 | 0.3562 | -3.68 | 1   | 0.00   | 1.06   | 0.00   | 0.00   | 4   | 1.53   | 0.00   | 0.73   | 1.64   |
| Q9D8B4 | NADH dehydrogenase [ubiquinone] 1 alpha subcomplex subunit 11       | 275  | 4  | 158  | 1190 | 0.9561 | -1.02 | 45  | 13.85  | 10.60  | 9.41   | 11.32  | 46  | 8.41   | 11.59  | 14.58  | 11.48  |
| Q6P069 | Sorcin                                                              | 290  | 5  | 103  | 292  | 0.1106 | -1.53 | 25  | 6.39   | 4.24   | 5.99   | 8.08   | 38  | 7.65   | 6.63   | 14.58  | 9.02   |
| Q99KX1 | Myeloid leukemia factor 2                                           | 323  | 5  | 93   | 1301 | 0.7148 | -1.04 | 22  | 9.59   | 0.00   | 5.99   | 6.47   | 23  | 6.12   | 9.11   | 4.38   | 3.28   |
| Q922R8 | Protein disulfide-isomerase A6                                      | 307  | 5  | 94   | 267  | 0.1725 | -5.87 | 5   | 2.13   | 0.00   | 1.71   | 1.62   | 32  | 6.12   | 14.91  | 10.21  | 0.82   |
| Q80TR1 | Latrophilin-1                                                       | 242  | 4  | 17   | 1453 | 0.6540 | 1.78  | 7   | 4.26   | 1.06   | 1.71   | 0.00   | 4   | 0.76   | 0.00   | 0.73   | 2.46   |
| Q9R111 | Guanine deaminase                                                   | 975  | 15 | 288  | 204  | 0.0901 | -1.35 | 60  | 14.92  | 10.60  | 17.12  | 17.78  | 81  | 17.58  | 20.70  | 23.34  | 19.68  |
| P99026 | Proteasome subunit beta type-4                                      | 792  | 10 | 346  | 78   | 0.0263 | -1.67 | 73  | 18.12  | 12.72  | 17.97  | 24.25  | 122 | 21.41  | 24.02  | 37.19  | 39.36  |
| Q9CYT6 | Adenylyl cyclase-associated protein 2                               | 655  | 9  | 231  | 180  | 0.0466 | -1.46 | 52  | 11.72  | 10.60  | 11.98  | 17.78  | 76  | 13.76  | 20.70  | 15.31  | 26.24  |
| P62874 | Guanine nucleotide-binding protein G(I)/G(S)/G(T) subunit beta-1    | 646  | 8  | 1047 | 459  | 0.3109 | -1.83 | 165 | 52.22  | 49.80  | 63.33  | 0.00   | 302 | 62.69  | 72.05  | 74.38  | 92.67  |
| P63216 | Guanine nucleotide-binding protein G(I)/G(S)/G(O) subunit gamma-5   | 381  | 6  | 153  | 1238 | 0.7797 | 2.02  | 13  | 11.72  | 0.00   | 0.00   | 1.62   | 7   | 0.76   | 0.00   | 5.83   | 0.00   |
| Q9QZ7  | Serine racemase                                                     | 302  | 4  | 63   | 19   | 0.0130 | -8.73 | 3   | 0.00   | 3.18   | 0.00   | 0.00   | 28  | 5.35   | 8.28   | 5.10   | 9.02   |
| Q9QYR6 | Microtubule-associated protein 1A                                   | 3187 | 52 | 1996 | 637  | 0.6261 | -1.14 | 526 | 157.72 | 131.39 | 146.35 | 90.54  | 598 | 118.50 | 186.34 | 115.95 | 177.14 |
| Q148V7 | LisH domain and HEAT repeat-containing protein KIAA1468             | 384  | 6  | 20   | 937  | 0.3773 | -2.54 | 4   | 0.00   | 1.06   | 2.57   | 0.00   | 9   | 3.82   | 0.00   | 2.92   | 2.46   |
| O55126 | Protein NipSnap homolog 2                                           | 656  | 10 | 269  | 882  | 0.7238 | -1.15 | 65  | 11.72  | 16.95  | 15.41  | 21.02  | 75  | 29.82  | 13.25  | 15.31  | 16.40  |
| Q9CPC6 | NADH dehydrogenase [ubiquinone] 1 alpha subcomplex subunit 5        | 448  | 7  | 278  | 1076 | 0.9773 | 1.11  | 72  | 23.44  | 18.01  | 5.99   | 24.25  | 65  | 20.64  | 10.77  | 15.31  | 18.04  |
| Q9DCM0 | Protein ETHE1, mitochondrial                                        | 354  | 6  | 106  | 989  | 0.4682 | -1.67 | 19  | 11.72  | 1.06   | 1.71   | 4.85   | 32  | 6.12   | 15.74  | 8.02   | 2.46   |
| A2CE44 | Zinc finger X-linked protein ZXDA/ZXDB                              | 135  | 2  | 241  | 1234 | 0.9612 | -1.05 | 49  | 10.66  | 12.72  | 16.26  | 9.70   | 52  | 18.35  | 14.91  | 10.94  | 7.38   |
| Q99M71 | Mammalian endymin-related protein 1                                 | 268  | 4  | 82   | 759  | 0.8104 | -1.66 | 13  | 4.26   | 3.18   | 2.57   | 3.23   | 22  | 12.23  | 1.66   | 0.73   | 7.38   |
| P11404 | Fatty acid-binding protein, heart                                   | 363  | 6  | 270  | 343  | 0.2526 | -1.53 | 57  | 19.18  | 20.13  | 6.85   | 11.32  | 88  | 19.11  | 26.50  | 29.17  | 13.12  |
| Q9CYZ2 | Tumor protein D54                                                   | 195  | 3  | 74   | 889  | 0.3738 | -1.31 | 19  | 4.26   | 1.06   | 6.85   | 6.47   | 24  | 5.35   | 6.63   | 5.83   | 6.56   |
| Q80ZJ1 | Ras-related protein Rap-2a                                          | 268  | 4  | 83   | 1286 | 0.8041 | -1.11 | 27  | 6.39   | 3.18   | 7.70   | 9.70   | 30  | 4.59   | 5.80   | 13.86  | 5.74   |
| Q91YT0 | NADH dehydrogenase [ubiquinone] flavoprotein 1, mitochondrial       | 795  | 12 | 263  | 1134 | 0.5098 | -1.12 | 42  | 12.79  | 18.01  | 11.13  | 0.00   | 47  | 13.76  | 7.45   | 17.50  | 8.20   |
| P63276 | 40S ribosomal protein S17                                           | 435  | 6  | 300  | 217  | 0.1344 | 1.58  | 107 | 33.04  | 14.83  | 18.83  | 40.42  | 68  | 16.82  | 10.77  | 21.15  | 18.86  |
| Q3UUI3 | Thioesterase superfamily member 4                                   | 283  | 4  | 141  | 866  | 0.6165 | 1.23  | 48  | 18.12  | 7.42   | 14.55  | 8.08   | 39  | 6.88   | 13.25  | 11.67  | 7.38   |
| Q71S12 | Microtubule-associated protein 6                                    | 907  | 14 | 433  | 1059 | 0.7554 | 1.01  | 104 | 27.71  | 33.91  | 34.23  | 8.08   | 103 | 20.64  | 34.78  | 25.52  | 22.14  |
| Q61081 | Hsp90 co-chaperone Cdc37                                            | 234  | 4  | 58   | 592  | 0.0718 | -1.77 | 9   | 0.00   | 4.24   | 5.14   | 0.00   | 17  | 1.53   | 8.28   | 5.10   | 1.64   |
| Q9Z1S5 | Neuronal-specific septin-3                                          | 418  | 6  | 176  | 390  | 0.1307 | -2.00 | 28  | 6.39   | 12.72  | 8.56   | 0.00   | 55  | 9.17   | 25.67  | 13.13  | 7.38   |
| Q9J146 | Diphosphoinositol polyphosphate phosphohydrolase 1                  | 315  | 5  | 170  | 575  | 0.1998 | -1.13 | 48  | 13.85  | 11.66  | 9.41   | 12.93  | 54  | 13.00  | 13.25  | 13.13  | 14.76  |
| Q99KB8 | Hydroxyacylglutathione hydrolase, mitochondrial                     | 507  | 8  | 134  | 245  | 0.0565 | -1.52 | 25  | 6.39   | 6.36   | 2.57   | 9.70   | 38  | 10.70  | 12.42  | 5.10   | 9.84   |
| Q9WUL7 | ADP-ribosylation factor-like protein 3                              | 563  | 8  | 197  | 518  | 0.2176 | -1.33 | 50  | 17.05  | 10.60  | 7.70   | 14.55  | 66  | 13.00  | 18.22  | 13.86  | 21.32  |
| Q99LC3 | NADH dehydrogenase [ubiquinone] 1 alpha subcomplex subunit 10       | 634  | 10 | 483  | 406  | 0.2508 | -2.03 | 63  | 20.25  | 22.25  | 20.54  | 0.00   | 128 | 28.29  | 25.67  | 37.92  | 36.08  |
| P62897 | Cytochrome c, somatic                                               | 535  | 8  | 851  | 229  | 0.2077 | -1.64 | 156 | 51.15  | 42.39  | 11.98  | 50.12  | 256 | 63.46  | 57.97  | 74.38  | 59.87  |
| Q61937 | Nucleophosmin                                                       | 376  | 6  | 174  | 256  | 0.0261 | -1.42 | 42  | 7.46   | 8.48   | 11.13  | 14.55  | 59  | 12.23  | 14.91  | 14.58  | 17.22  |
| Q9D1G1 | Ras-related protein Rab-1B                                          | 453  | 7  | 413  | 200  | 0.1221 | -1.60 | 78  | 29.84  | 16.95  | 17.97  | 12.93  | 124 | 24.46  | 33.96  | 38.65  | 27.06  |
| Q8BK64 | Activator of 90 kDa heat shock protein ATPase homolog 1             | 298  | 4  | 275  | 734  | 0.4231 | 1.14  | 82  | 17.05  | 29.67  | 18.83  | 16.17  | 72  | 21.41  | 21.53  | 18.23  | 10.66  |
| O88696 | Putative ATP-dependent Clp protease proteolytic subunit, mitochondr | 456  | 6  | 138  | 1019 | 0.6697 | 1.09  | 34  | 11.72  | 7.42   | 10.27  | 4.85   | 31  | 7.65   | 12.42  | 7.29   | 4.10   |
| Q8B9Y6 | Neuronal calcium sensor 1                                           | 361  | 6  | 64   | 347  | 0.2150 | -1.67 | 15  | 3.20   | 0.00   | 1.71   | 9.70   | 24  | 3.82   | 5.80   | 6.56   | 8.20   |
| Q9D880 | Mitochondrial import inner membrane translocase subunit TIM50       | 185  | 3  | 7    | 1550 | 0.9889 | 1.03  | 1   | 0.00   | 0.00   | 0.86   | 0.00   | 1   | 0.00   | 0.83   | 0.00   | 0.00   |
|        |                                                                     |      |    |      |      |        |       |     |        |        |        |        |     |        |        |        |        |

|        |                                                                             |      |    |      |      |        |       |     |        |        |        |        |     |        |        |        |        |
|--------|-----------------------------------------------------------------------------|------|----|------|------|--------|-------|-----|--------|--------|--------|--------|-----|--------|--------|--------|--------|
| P70699 | Lysosomal alpha-glucosidase                                                 | 223  | 4  | 25   | 543  | 0.1032 | -8.36 | 2   | 0.00   | 0.00   | 0.00   | 1.62   | 14  | 4.59   | 0.00   | 0.73   | 8.20   |
| P56135 | ATP synthase subunit f, mitochondrial                                       | 331  | 4  | 280  | 821  | 0.7010 | -2.07 | 23  | 10.66  | 3.18   | 5.99   | 3.23   | 48  | 4.59   | 11.59  | 30.63  | 0.82   |
| Q922B1 | MACRO domain-containing protein 1                                           | 417  | 5  | 120  | 897  | 0.6048 | -1.18 | 31  | 6.39   | 7.42   | 5.99   | 11.32  | 37  | 13.76  | 9.11   | 7.29   | 6.56   |
| Q80XI4 | Phosphatidylinositol-5-phosphate 4-kinase type-2 beta                       | 162  | 2  | 20   | 1487 | 0.8905 | -1.07 | 3   | 1.07   | 1.06   | 0.86   | 0.00   | 3   | 0.00   | 0.00   | 0.73   | 2.46   |
| P62204 | Calmodulin                                                                  | 630  | 7  | 1196 | 698  | 0.4993 | -1.10 | 338 | 66.07  | 111.26 | 62.48  | 98.62  | 371 | 96.33  | 83.65  | 88.24  | 102.51 |
| Q91VN4 | Coiled-coil-helix-coiled-coil-helix domain-containing protein 6             | 340  | 5  | 85   | 570  | 0.3153 | -2.10 | 10  | 2.13   | 3.18   | 3.42   | 1.62   | 22  | 2.29   | 7.45   | 2.19   | 9.84   |
| P32037 | Solute carrier family 2, facilitated glucose transporter member 3           | 189  | 3  | 61   | 959  | 0.4340 | -1.71 | 11  | 1.07   | 6.36   | 1.71   | 1.62   | 18  | 1.53   | 2.48   | 9.48   | 4.92   |
| Q91X97 | Neurocalcin-delta                                                           | 601  | 7  | 386  | 917  | 0.6370 | 1.07  | 104 | 30.90  | 18.01  | 25.68  | 29.10  | 97  | 13.76  | 16.56  | 28.44  | 38.54  |
| P61082 | NEDD8-conjugating enzyme Ubc12                                              | 226  | 4  | 138  | 213  | 0.0965 | -1.78 | 29  | 10.66  | 4.24   | 9.41   | 4.85   | 52  | 12.23  | 14.91  | 18.23  | 6.56   |
| Q02248 | Catenin beta-1                                                              | 748  | 10 | 143  | 1408 | 0.9846 | -1.25 | 29  | 4.26   | 5.30   | 8.56   | 11.32  | 37  | 5.35   | 1.66   | 10.94  | 18.86  |
| Q62425 | NADH dehydrogenase [ubiquinone] 1 alpha subcomplex subunit 4                | 196  | 3  | 227  | 1196 | 0.6588 | 1.47  | 35  | 17.05  | 1.06   | 2.57   | 14.55  | 24  | 2.29   | 0.83   | 17.50  | 3.28   |
| P50171 | Estradiol 17-beta-dehydrogenase 8                                           | 329  | 5  | 45   | 744  | 0.2353 | -1.94 | 6   | 3.20   | 1.06   | 1.71   | 0.00   | 12  | 1.53   | 3.31   | 5.10   | 1.64   |
| Q921F2 | TAR DNA-binding protein 43                                                  | 411  | 6  | 128  | 372  | 0.0222 | -2.84 | 14  | 2.13   | 6.36   | 5.99   | 0.00   | 41  | 8.41   | 13.25  | 14.58  | 4.92   |
| Q9CXW4 | 60S ribosomal protein L11                                                   | 239  | 4  | 96   | 272  | 0.0831 | 2.52  | 41  | 13.85  | 7.42   | 10.27  | 9.70   | 16  | 4.59   | 0.00   | 4.38   | 7.38   |
| Q9D358 | Low molecular weight phosphotyrosine protein phosphatase                    | 558  | 8  | 329  | 586  | 0.3174 | -1.20 | 88  | 18.12  | 22.25  | 15.41  | 32.33  | 105 | 25.99  | 17.39  | 22.61  | 39.36  |
| Q8BNW9 | Kelch repeat and BTB domain-containing protein 11                           | 350  | 6  | 25   | 1514 | 0.8593 | 1.13  | 6   | 1.07   | 0.00   | 5.14   | 0.00   | 6   | 0.76   | 0.00   | 1.46   | 3.28   |
| P62137 | Serine/threonine-protein phosphatase PP1-alpha catalytic subunit            | 167  | 3  | 34   | 469  | 0.0270 | -2.11 | 6   | 1.07   | 3.18   | 1.71   | 0.00   | 13  | 3.06   | 4.97   | 2.92   | 1.64   |
| P17751 | Triosephosphate isomerase                                                   | 1089 | 13 | 2157 | 138  | 0.0337 | -1.21 | 492 | 134.27 | 135.63 | 110.40 | 111.55 | 593 | 162.84 | 153.21 | 122.51 | 154.18 |
| Q9DB73 | NADH-cytochrome b5 reductase 1                                              | 285  | 5  | 31   | 1344 | 0.5837 | -1.81 | 5   | 3.20   | 0.00   | 1.71   | 0.00   | 9   | 2.29   | 1.66   | 0.00   | 4.92   |
| Q99LY9 | NADH dehydrogenase [ubiquinone] iron-sulfur protein 5                       | 328  | 5  | 205  | 633  | 0.4239 | -1.45 | 49  | 13.85  | 8.48   | 7.70   | 19.40  | 72  | 12.23  | 15.74  | 30.63  | 13.12  |
| Q921J2 | GTP-binding protein Rheb                                                    | 139  | 2  | 29   | 336  | 0.0247 | -3.84 | 4   | 2.13   | 0.00   | 0.00   | 1.62   | 14  | 3.82   | 1.66   | 0.73   | 8.20   |
| Q8C996 | Transmembrane protein 163                                                   | 186  | 3  | 19   | 1425 | 0.6715 | 2.17  | 5   | 1.07   | 0.00   | 4.28   | 0.00   | 2   | 0.00   | 0.00   | 0.00   | 2.46   |
| Q78IK4 | Apolipoprotein O-like                                                       | 162  | 2  | 30   | 1036 | 0.3428 | 1.29  | 10  | 4.26   | 2.12   | 1.71   | 1.62   | 8   | 4.59   | 0.00   | 2.92   | 0.00   |
| P68037 | Ubiquitin-conjugating enzyme E2 L3                                          | 335  | 4  | 404  | 402  | 0.2350 | -1.23 | 92  | 24.51  | 24.37  | 22.25  | 21.02  | 114 | 29.05  | 25.67  | 21.88  | 36.90  |
| P57746 | V-type proton ATPase subunit D                                              | 599  | 9  | 361  | 780  | 0.6337 | 1.22  | 111 | 22.38  | 46.62  | 21.40  | 21.02  | 92  | 28.29  | 16.56  | 26.98  | 19.68  |
| Q9QZ88 | Vacuolar protein sorting-associated protein 29                              | 240  | 4  | 128  | 1353 | 0.8799 | 1.05  | 43  | 15.99  | 8.48   | 5.14   | 12.93  | 41  | 4.59   | 18.22  | 8.75   | 9.02   |
| Q9CQB5 | CDGSH iron-sulfur domain-containing protein 2                               | 206  | 3  | 43   | 792  | 0.2548 | -1.32 | 10  | 1.07   | 1.06   | 2.57   | 4.85   | 13  | 2.29   | 0.83   | 2.92   | 6.56   |
| P62702 | 40S ribosomal protein S4, X isoform                                         | 563  | 8  | 255  | 367  | 0.1678 | 1.17  | 75  | 20.25  | 22.25  | 12.84  | 19.40  | 64  | 19.11  | 14.91  | 12.40  | 17.22  |
| Q63844 | Mitogen-activated protein kinase 3                                          | 208  | 3  | 106  | 586  | 0.1151 | -2.07 | 14  | 3.20   | 3.18   | 7.70   | 0.00   | 29  | 7.65   | 10.77  | 6.56   | 4.10   |
| P85094 | Isochorismatase domain-containing protein 2A, mitochondrial                 | 355  | 5  | 296  | 78   | 0.0320 | -1.53 | 60  | 18.12  | 18.01  | 11.13  | 12.93  | 92  | 29.82  | 21.53  | 22.61  | 18.04  |
| Q9CQE8 | UPF0568 protein C14orf166 homolog                                           | 472  | 7  | 100  | 551  | 0.2498 | -1.89 | 19  | 5.33   | 2.12   | 3.42   | 8.08   | 36  | 17.58  | 8.28   | 5.10   | 4.92   |
| Q9DBD5 | Proline-, glutamic acid- and leucine-rich protein 1                         | 161  | 3  | 49   | 1354 | 0.7564 | -1.19 | 12  | 1.07   | 6.36   | 2.57   | 1.62   | 14  | 6.12   | 1.66   | 4.38   | 1.64   |
| Q9Z2U0 | Proteasome subunit alpha type-7                                             | 341  | 5  | 140  | 1173 | 0.8856 | 1.07  | 43  | 10.66  | 6.36   | 8.56   | 17.78  | 40  | 10.70  | 14.91  | 5.83   | 9.02   |
| Q9CRB9 | Coiled-coil-helix-coiled-coil-helix domain-containing protein 3, mitochondr | 334  | 5  | 115  | 299  | 0.1263 | 1.56  | 41  | 13.85  | 8.48   | 9.41   | 9.70   | 27  | 7.65   | 2.48   | 5.83   | 10.66  |
| P10630 | Eukaryotic initiation factor 4A-II                                          | 362  | 5  | 44   | 1437 | 0.6942 | -1.01 | 11  | 2.13   | 5.30   | 3.42   | 0.00   | 11  | 4.59   | 3.31   | 2.19   | 0.82   |
| O88851 | Putative hydrolase RBBP9                                                    | 142  | 2  | 50   | 497  | 0.2078 | 1.34  | 18  | 3.20   | 2.12   | 5.99   | 6.47   | 13  | 3.82   | 1.66   | 3.65   | 4.10   |
| P97300 | Neuroplastin                                                                | 373  | 5  | 570  | 147  | 0.1229 | 1.66  | 194 | 39.43  | 54.04  | 40.22  | 59.82  | 117 | 23.70  | 17.39  | 45.21  | 30.34  |
| Q6PER3 | Microtubule-associated protein RP/EB family member 3                        | 579  | 9  | 252  | 1069 | 0.9019 | -1.07 | 71  | 20.25  | 6.36   | 20.54  | 24.25  | 76  | 22.94  | 21.53  | 6.56   | 25.42  |
| Q8BG73 | SH3 domain-binding glutamic acid-rich-like protein 2                        | 394  | 6  | 116  | 164  | 0.0326 | -4.66 | 8   | 7.46   | 0.00   | 0.86   | 0.00   | 39  | 13.00  | 5.80   | 17.50  | 2.46   |
| Q923D2 | Flavin reductase                                                            | 299  | 4  | 135  | 1162 | 0.5174 | -1.40 | 33  | 12.79  | 5.30   | 15.41  | 0.00   | 47  | 15.29  | 12.42  | 3.65   | 15.58  |
| P62869 | Transcription elongation factor B polypeptide 2                             | 423  | 5  | 176  | 498  | 0.3331 | -1.56 | 41  | 9.59   | 9.54   | 5.99   | 16.17  | 64  | 13.00  | 17.39  | 24.07  | 9.84   |
| O08583 | THO complex subunit 4                                                       | 164  | 3  | 29   | 1251 | 0.4058 | 2.10  | 6   | 1.07   | 2.12   | 0.00   | 3.23   | 3   | 3.06   | 0.00   | 0.00   | 0.00   |
| Q9R0P9 | Ubiquitin carboxyl-terminal hydrolase isozyme L1                            | 1257 | 19 | 1438 | 89   | 0.0302 | -1.29 | 312 | 102.30 | 73.11  | 77.03  | 59.82  | 404 | 116.21 | 113.46 | 101.37 | 72.99  |
| Q07417 | Short-chain specific acyl-CoA dehydrogenase, mitochondrial                  | 169  | 3  | 8    | 1556 | ?      | 0.00  | 0   | 0.00   | 0.00   | 0.00   | 0.00   | 0   | 0.00   | 0.00   | 0.00   | 0.00   |
| Q9CX56 | 26S proteasome non-ATPase regulatory subunit 8                              | 138  | 2  | 38   | 247  | 0.0503 | -2.38 | 5   | 4.26   | 1.06   | 0.00   | 0.00   | 13  | 5.35   | 4.14   | 0.73   | 2.46   |
| Q9ERR7 | 15 kDa selenoprotein                                                        | 188  | 3  | 13   | 1547 | 0.9850 | -1.08 | 4   | 0.00   | 0.00   | 0.86   | 3.23   | 4   | 0.76   | 0.00   | 3.65   | 0.00   |
| A2AJ10 | MAP7 domain-containing protein 1                                            | 161  | 3  | 5    | 1522 | 0.3910 | -0.83 | 0   | 0.00   | 0.00   | 0.00   | 0.00   | 1   | 0.00   | 0.83   | 0.00   | 0.00   |
| Q9CRD2 | Tetratricopeptide repeat protein 35                                         | 236  | 4  | 31   | 1476 | 0.8031 | 1.44  | 9   | 5.33   | 0.00   | 0.86   | 3.23   | 7   | 0.76   | 3.31   | 0.00   | 2.46   |
| Q91VF2 | Histamine N-methyltransferase                                               | 165  | 3  | 38   | 884  | 0.2900 | -1.21 | 10  | 4.26   | 1.06   | 2.57   | 1.62   | 12  | 4.59   | 0.83   | 3.65   | 2.46   |
| Q61282 | Aggrecan core protein                                                       | 170  | 3  | 18   | 1133 | 0.2460 | -4.05 | 2   | 0.00   | 0.00   | 0.00   | 1.62   | 7   | 0.76   | 4.14   | 0.00   | 1.64   |
| P60879 | Synaptosomal-associated protein 25                                          | 1544 | 22 | 1711 | 810  | 0.7834 | 1.08  | 443 | 111.90 | 121.86 | 71.89  | 137.42 | 412 | 131.50 | 76.19  | 110.85 | 93.49  |
| Q99PL5 | Ribosome-binding protein 1                                                  | 230  | 3  | 9    | 1448 | 0.6655 | -1.85 | 1   | 0.00   | 0.00   | 0.86   | 0.00   | 2   | 0.76   | 0.00   | 0.00   | 0.82   |
| Q99J16 | Ras-related protein Rap-1b                                                  | 414  | 6  | 119  | 1288 | 0.9929 | -1.00 | 35  | 12.79  | 4.24   | 8.56   | 9.70   | 35  | 4.59   | 7.45   | 10.21  | 13.12  |
| Q8BWM0 | Prostaglandin E synthase 2                                                  | 319  | 5  | 100  | 618  | 0.3635 | -1.36 | 19  | 10.66  | 5.30   | 3.42   | 0.00   | 26  | 6.88   | 4.97   | 8.02   | 6.56   |
| P35279 | Ras-related protein Rab-6A                                                  | 418  | 6  | 189  | 577  | 0.2143 | -1.65 | 32  | 12.79  | 8.48   | 10.27  | 0.00   | 52  | 13.76  | 13.25  | 16.04  | 9.02   |
| Q9JLM8 | Serine/threonine-protein kinase DCLK1                                       | 447  | 7  | 57   | 477  | 0.1016 | -1.59 | 10  | 0.00   | 3.18   | 3.42   | 3.23   | 16  | 1.53   | 3.31   | 5.10   | 5.74   |
| P61087 | Ubiquitin-conjugating enzyme E2 K                                           | 583  | 9  | 112  | 502  | 0.2085 | -1.89 | 21  | 8.53   | 5.30   | 6.85   | 0.00   | 39  | 12.23  | 8.28   | 8.75   | 9.84   |
| Q99LX0 | Protein DJ-1                                                                | 1024 | 15 | 935  | 505  | 0.3091 | -1.14 | 228 | 85.25  | 38.15  | 67.61  | 37.18  | 260 | 70.34  | 60.46  | 72.20  | 57.41  |
| Q9DCT2 | NADH dehydrogenase [ubiquinone] iron-sulfur protein 3, mitochondr           | 789  | 11 | 811  | 704  | 0.5020 | 1.09  | 195 | 56.48  | 52.98  | 41.94  | 43.65  | 178 | 54.28  | 45.55  | 53.24  | 25.42  |
| P62835 | Ras-related protein Rap-1A                                                  | 386  | 6  | 83   | 340  | 0.1525 | -1.54 | 17  | 6.39   | 2.12   | 3.42   | 4.85   | 26  | 5.35   | 3.31   | 6.56   | 10.66  |
| Q8BZA9 | Probable fructose-2,6-bisphosphatase TIGAR                                  | 187  | 3  | 25   | 1238 | 0.3767 | -3.80 | 2   | 2.13   | 0.00   | 0.00   | 0.00   | 8   | 2.29   | 5.80   | 0.00   | 0.00   |
| P63101 | 14-3-3 protein zeta/delta                                                   | 1285 | 17 | 2467 | 412  | 0.2870 | -1.14 | 586 | 152.39 | 145.17 | 131.80 | 156.82 | 666 | 208.72 | 169.78 | 119.60 | 168.12 |
| Q8BLQ9 | Cell adhesion molecule 2                                                    | 334  | 5  | 190  | 73   | 0.0020 | 1.99  | 65  | 13.85  | 11.66  | 20.54  | 19.40  | 33  | 6.88   | 5.80   | 8.75   | 11.48  |
| Q8JZS0 | Protein lin-7 homolog A                                                     | 259  | 4  | 68   | 97   | 0.0800 | -2.69 | 9   | 6.39   | 0.00   | 2.57   | 0.00   | 24  | 6.88   | 6.63   | 7.29   | 3.28   |
| P47809 | Dual specificity mitogen-activated protein kinase kinase 4                  | 208  | 4  | 53   | 389  | 0.1693 | -2.26 | 8   | 1.07   | 0.00   | 6.85   | 0.00   | 18  | 7.65   | 4.97   | 3.65   | 1.64   |
| P63213 | Guanine nucleotide-binding protein G(I)/G(S)/G(O) subunit gamma-2           | 176  | 3  | 64   | 1334 | 0.6494 | 5.85  | 9   | 8.53   | 0.00   | 0.00   | 0.00   | 1   | 0.00   | 0.00   | 1.46   | 0.00   |
| Q9CQX2 | Cytochrome b5 type B                                                        | 148  | 2  | 88   | 1060 | 0.5140 | 1.21  | 27  | 6.39   | 6.36   | 4.28   | 9.70   | 22  | 0.76   | 7.45   | 6.56   | 7.38   |
| Q8C163 | Nuclease EXOG, mitochondrial                                                | 202  | 3  | 40   | 520  | 0.0600 | -5.81 | 1   | 0.00   | 1.06   | 0.00   | 0.00   | 6   | 0.76   | 1.66   | 2.92   | 0.82   |
| Q5DU25 | IQ motif and SEC7 domain-containing protein 2                               | 219  | 4  | 12   | 1219 | 0.3583 | 4.10  | 3   | 2.13   | 0.00   | 0.86   | 0.00   | 1   | 0.00   | 0.00   | 0.73   | 0.00   |
| P62855 | 40S ribosomal protein S26                                                   | 196  | 3  | 154  | 1229 | 0.6141 | -1.07 | 46  | 17.05  | 7.42   | 3.42   | 17.78  | 49  | 15.29  | 14.91  | 9.48   | 9.02   |
| P67871 | Casein kinase II subunit beta                                               | 420  | 7  | 186  | 1012 | 0.8057 | 1.19  | 50  | 19.18  | 2.12   | 22.25  | 6.47   | 42  | 13.00  | 9.11   | 10.21  | 9.84   |
| O70503 | Estradiol 17-beta-dehydrogenase 12                                          | 479  | 7  | 122  | 927  | 0.7141 | -1.22 | 27  | 9.59   | 5.30   | 5.99   | 6.47   | 33  | 10.70  | 11.59  | 2.92   | 8.20   |
| P62821 | Ras-related protein Rab-1A                                                  | 350  | 5  | 425  | 226  | 0.0933 | -1.47 | 88  | 37.30  | 18.01  | 17.97  | 14.55  | 129 | 33.64  | 33.13  | 34.27  |        |

|        |                                                                      |      |    |      |      |        |       |     |        |        |        |        |     |        |        |        |        |
|--------|----------------------------------------------------------------------|------|----|------|------|--------|-------|-----|--------|--------|--------|--------|-----|--------|--------|--------|--------|
| Q9DC70 | NADH dehydrogenase [ubiquinone] iron-sulfur protein 7, mitochondrial | 517  | 7  | 344  | 105  | 0.0681 | 1.56  | 110 | 33.04  | 24.37  | 22.25  | 30.72  | 71  | 18.35  | 10.77  | 21.88  | 19.68  |
| Q9CR61 | NADH dehydrogenase [ubiquinone] 1 beta subcomplex subunit 7          | 920  | 14 | 548  | 521  | 0.3443 | 1.26  | 162 | 34.10  | 41.33  | 33.38  | 53.35  | 129 | 30.58  | 24.85  | 45.21  | 27.88  |
| Q8R1F5 | Putative hydroxypyruvate isomerase                                   | 170  | 3  | 47   | 1327 | 0.7770 | 1.28  | 15  | 8.53   | 4.24   | 0.86   | 1.62   | 12  | 1.53   | 6.63   | 2.92   | 0.82   |
| Q60932 | Voltage-dependent anion-selective channel protein 1                  | 1460 | 17 | 2894 | 720  | 0.6760 | -1.17 | 642 | 195.02 | 133.51 | 166.03 | 147.12 | 750 | 148.32 | 131.68 | 157.52 | 312.45 |
| P48774 | Glutathione S-transferase Mu 5                                       | 1110 | 17 | 515  | 459  | 0.3370 | -1.42 | 99  | 33.04  | 27.55  | 25.68  | 12.93  | 140 | 50.46  | 19.88  | 29.90  | 40.18  |
| Q9WUC3 | Lymphocyte antigen 6H                                                | 216  | 3  | 175  | 608  | 0.3389 | 1.35  | 53  | 14.92  | 12.72  | 11.13  | 14.55  | 40  | 3.82   | 8.28   | 22.61  | 4.92   |
| Q9D924 | Iron-sulfur cluster assembly 1 homolog, mitochondrial                | 229  | 4  | 27   | 194  | 0.0820 | -6.31 | 2   | 1.07   | 1.06   | 0.00   | 0.00   | 13  | 1.53   | 2.48   | 3.65   | 5.74   |
| Q9CQJ8 | NADH dehydrogenase [ubiquinone] 1 beta subcomplex subunit 9          | 333  | 6  | 201  | 1273 | 0.9421 | 1.10  | 56  | 26.64  | 10.60  | 11.98  | 6.47   | 51  | 15.29  | 9.11   | 18.23  | 8.20   |
| Q9DCX2 | ATP synthase subunit d, mitochondrial                                | 853  | 13 | 829  | 174  | 0.1288 | -1.44 | 159 | 55.41  | 31.79  | 37.66  | 33.95  | 228 | 56.57  | 36.44  | 61.99  | 72.99  |
| Q9D3D9 | ATP synthase subunit delta, mitochondrial                            | 303  | 4  | 183  | 1256 | 0.9419 | 1.12  | 60  | 13.85  | 10.60  | 5.99   | 29.10  | 53  | 11.47  | 16.56  | 13.86  | 11.48  |
| Q9R1P1 | Proteasome subunit beta type-3                                       | 342  | 5  | 210  | 122  | 0.1038 | -2.46 | 32  | 18.12  | 6.36   | 5.99   | 1.62   | 79  | 20.64  | 14.08  | 19.69  | 24.60  |
| Q8BFR5 | Elongation factor Tu, mitochondrial                                  | 834  | 13 | 206  | 229  | 0.1174 | -1.79 | 31  | 4.26   | 19.07  | 7.70   | 0.00   | 56  | 10.70  | 21.53  | 16.04  | 7.38   |
| Q9Z1R2 | Large proline-rich protein BAT3                                      | 147  | 2  | 33   | 381  | 0.0387 | -3.13 | 4   | 2.13   | 1.06   | 0.86   | 0.00   | 13  | 3.06   | 5.80   | 2.19   | 1.64   |
| O55042 | Alpha-synuclein                                                      | 433  | 5  | 677  | 364  | 0.1648 | -1.64 | 144 | 34.10  | 26.49  | 15.41  | 67.90  | 236 | 58.87  | 39.75  | 72.20  | 64.79  |
| P61226 | Ras-related protein Rap-2b                                           | 485  | 7  | 196  | 962  | 0.7800 | 1.11  | 61  | 23.44  | 13.78  | 12.84  | 11.32  | 56  | 7.65   | 14.08  | 18.23  | 15.58  |
| P35803 | Neuronal membrane glycoprotein M6-b                                  | 245  | 4  | 155  | 1152 | 0.4937 | 1.10  | 30  | 9.59   | 3.18   | 7.70   | 9.70   | 27  | 4.59   | 1.66   | 13.86  | 7.38   |
| Q9D6S7 | Ribosome-recycling factor, mitochondrial                             | 337  | 5  | 45   | 1441 | 0.8136 | 1.03  | 9   | 5.33   | 1.06   | 2.57   | 0.00   | 9   | 0.76   | 2.48   | 2.19   | 3.28   |
| Q8VHL1 | Histone-lysine N-methyltransferase SETD7                             | 167  | 2  | 10   | 1115 | 0.2283 | -3.89 | 0   | 0.00   | 0.00   | 0.00   | 0.00   | 4   | 3.06   | 0.83   | 0.00   | 0.00   |
| Q9CQ54 | NADH dehydrogenase [ubiquinone] 1 subunit C2                         | 462  | 7  | 173  | 330  | 0.1583 | -2.72 | 22  | 9.59   | 3.18   | 2.57   | 6.47   | 59  | 19.88  | 7.45   | 26.25  | 5.74   |
| Q9CQR4 | Acyl-coenzyme A thioesterase 13                                      | 594  | 9  | 327  | 886  | 0.3861 | -1.17 | 91  | 25.58  | 15.89  | 11.13  | 38.80  | 107 | 35.93  | 15.74  | 24.07  | 31.16  |
| Q8VE70 | Programmed cell death protein 10                                     | 226  | 4  | 77   | 816  | 0.2780 | -1.78 | 13  | 5.33   | 1.06   | 6.85   | 0.00   | 24  | 3.06   | 7.45   | 7.29   | 5.74   |
| Q9D6I6 | NADH dehydrogenase [ubiquinone] flavoprotein 2, mitochondrial        | 847  | 12 | 538  | 1230 | 0.8527 | 1.10  | 121 | 47.96  | 27.55  | 40.22  | 4.85   | 110 | 32.87  | 14.08  | 28.44  | 34.44  |
| P97496 | SWI/SNF complex subunit SMARCC1                                      | 252  | 4  | 110  | 275  | 0.1424 | 1.65  | 32  | 5.33   | 8.48   | 6.85   | 11.32  | 19  | 5.35   | 4.14   | 5.83   | 4.10   |
| P23506 | Protein-L-isoaspartate(D-aspartate) O-methyltransferase              | 667  | 10 | 331  | 136  | 0.0405 | -1.56 | 62  | 18.12  | 14.83  | 19.68  | 9.70   | 97  | 34.40  | 19.05  | 24.07  | 19.68  |
| Q8BPN8 | DmX-like protein 2                                                   | 4121 | 64 | 1486 | 429  | 0.3533 | -1.30 | 359 | 101.24 | 56.16  | 104.41 | 97.00  | 466 | 162.08 | 125.88 | 82.40  | 95.95  |
| Q64010 | Adapter molecule crk                                                 | 262  | 4  | 74   | 96   | 0.0978 | -3.02 | 9   | 1.07   | 3.18   | 5.14   | 0.00   | 28  | 6.12   | 6.63   | 6.56   | 9.02   |
| P62281 | 40S ribosomal protein S11                                            | 188  | 3  | 130  | 1419 | 0.6575 | -1.03 | 34  | 7.46   | 4.24   | 18.83  | 3.23   | 35  | 14.53  | 6.63   | 9.48   | 4.10   |
| P61021 | Ras-related protein Rab-5B                                           | 425  | 6  | 217  | 448  | 0.1476 | -1.32 | 48  | 13.85  | 5.30   | 12.84  | 16.17  | 64  | 19.88  | 10.77  | 11.67  | 21.32  |
| P97823 | Acyl-protein thioesterase 1                                          | 246  | 4  | 67   | 628  | 0.1744 | -2.14 | 11  | 4.26   | 1.06   | 5.99   | 0.00   | 24  | 9.17   | 4.14   | 4.38   | 6.56   |
| Q9DCJ5 | NADH dehydrogenase [ubiquinone] 1 alpha subcomplex subunit 8         | 295  | 5  | 319  | 749  | 0.2945 | -1.26 | 77  | 30.90  | 5.30   | 21.40  | 19.40  | 97  | 21.41  | 14.91  | 32.82  | 27.88  |
| Q5M8N4 | Epimerase family protein SDR39U1                                     | 189  | 3  | 23   | 1097 | 0.3756 | -3.74 | 2   | 0.00   | 0.00   | 0.00   | 1.62   | 6   | 2.29   | 0.83   | 2.92   | 0.00   |
| P51410 | 60S ribosomal protein L9                                             | 397  | 6  | 177  | 916  | 0.6482 | -1.58 | 35  | 13.85  | 8.48   | 9.41   | 3.23   | 55  | 24.46  | 4.97   | 4.38   | 21.32  |
| Q7TQ95 | Protein lunapark                                                     | 125  | 2  | 35   | 1494 | 0.9552 | 1.06  | 8   | 1.07   | 2.12   | 5.14   | 0.00   | 8   | 0.00   | 1.66   | 2.92   | 3.28   |
| P61294 | Ras-related protein Rab-6B                                           | 350  | 5  | 94   | 946  | 0.3582 | -1.58 | 19  | 9.59   | 0.00   | 5.99   | 3.23   | 30  | 3.82   | 7.45   | 9.48   | 9.02   |
| Q7TQD2 | Tubulin polymerization-promoting protein                             | 553  | 6  | 1010 | 868  | 0.7955 | -1.02 | 243 | 77.79  | 61.46  | 50.49  | 53.35  | 249 | 60.40  | 62.94  | 70.74  | 54.95  |
| Q9CR62 | Mitochondrial 2-oxoglutarate/malate carrier protein                  | 846  | 12 | 741  | 880  | 0.8049 | 1.02  | 188 | 46.89  | 40.27  | 59.05  | 42.04  | 185 | 51.99  | 28.16  | 48.13  | 56.59  |
| P61759 | Prefoldin subunit 3                                                  | 412  | 6  | 71   | 456  | 0.0842 | -2.83 | 9   | 3.20   | 1.06   | 4.28   | 0.00   | 24  | 8.41   | 3.31   | 5.83   | 6.56   |
| P35278 | Ras-related protein Rab-5C                                           | 667  | 8  | 480  | 470  | 0.3426 | -1.28 | 100 | 33.04  | 22.25  | 26.53  | 17.78  | 127 | 26.76  | 25.67  | 32.82  | 41.82  |
| Q9WUK2 | Eukaryotic translation initiation factor 4H                          | 372  | 5  | 263  | 242  | 0.0911 | -1.28 | 66  | 13.85  | 21.19  | 16.26  | 14.55  | 84  | 22.17  | 21.53  | 18.96  | 21.32  |
| O08756 | 3-hydroxyacyl-CoA dehydrogenase type-2                               | 624  | 8  | 388  | 372  | 0.1670 | -1.17 | 98  | 20.25  | 27.55  | 21.40  | 29.10  | 115 | 30.58  | 30.64  | 24.79  | 28.70  |
| P61982 | 14-3-3 protein gamma                                                 | 746  | 11 | 806  | 772  | 0.7341 | -1.08 | 183 | 44.76  | 57.22  | 39.37  | 42.04  | 197 | 58.10  | 47.21  | 32.09  | 59.87  |
| P67984 | 60S ribosomal protein L22                                            | 334  | 5  | 147  | 1136 | 0.7291 | -1.03 | 40  | 11.72  | 6.36   | 5.99   | 16.17  | 41  | 13.76  | 6.63   | 10.21  | 10.66  |
| Q921H8 | 3-ketoacyl-CoA thiolase A, peroxisomal                               | 127  | 2  | 49   | 321  | 0.1703 | -3.07 | 4   | 0.00   | 2.12   | 1.71   | 0.00   | 12  | 5.35   | 3.31   | 1.46   | 1.64   |
| Q8BX70 | Vacuolar protein sorting-associated protein 13C                      | 759  | 12 | 75   | 1102 | 0.3014 | 1.23  | 17  | 9.59   | 1.06   | 3.42   | 3.23   | 14  | 8.41   | 0.00   | 0.73   | 4.92   |
| Q7TQF7 | Amphiphysin                                                          | 511  | 8  | 211  | 315  | 0.1640 | -2.99 | 21  | 4.26   | 5.30   | 10.27  | 1.62   | 64  | 9.17   | 9.11   | 13.13  | 32.80  |
| Q61701 | ELAV-like protein 4                                                  | 128  | 2  | 3    | 1519 | 0.3910 | 0.86  | 1   | 0.00   | 0.00   | 0.86   | 0.00   | 0   | 0.00   | 0.00   | 0.00   | 0.00   |
| P62761 | Visinin-like protein 1                                               | 1166 | 16 | 947  | 60   | 0.0165 | -1.32 | 204 | 49.02  | 42.39  | 44.50  | 67.90  | 270 | 59.63  | 55.49  | 70.01  | 84.47  |
| Q9WTR5 | Cadherin-13                                                          | 170  | 2  | 46   | 794  | 0.3227 | 1.41  | 15  | 3.20   | 2.12   | 3.42   | 6.47   | 11  | 1.53   | 1.66   | 5.10   | 2.46   |
| Q9QYF9 | Protein NDRG3                                                        | 332  | 5  | 46   | 223  | 0.0275 | -2.55 | 5   | 0.00   | 3.18   | 1.71   | 0.00   | 12  | 2.29   | 4.97   | 4.38   | 0.82   |
| P41216 | Long-chain-fatty-acid-CoA ligase 1                                   | 227  | 4  | 32   | 1372 | 0.6228 | -1.68 | 4   | 2.13   | 0.00   | 1.71   | 0.00   | 6   | 1.53   | 1.66   | 0.00   | 3.28   |
| P63044 | Vesicle-associated membrane protein 2                                | 425  | 5  | 793  | 966  | 0.9069 | -1.06 | 216 | 56.48  | 54.04  | 50.49  | 54.97  | 229 | 61.93  | 33.96  | 60.53  | 72.17  |
| Q9WTP6 | Adenylate kinase 2, mitochondrial                                    | 204  | 3  | 46   | 840  | 0.4989 | 1.58  | 18  | 7.46   | 1.06   | 4.28   | 4.85   | 11  | 0.76   | 2.48   | 2.19   | 5.74   |
| P62331 | ADP-ribosylation factor 6                                            | 503  | 7  | 211  | 465  | 0.2224 | -1.14 | 51  | 13.85  | 8.48   | 12.84  | 16.17  | 59  | 15.29  | 12.42  | 16.04  | 14.76  |
| Q9D892 | Inosine triphosphate pyrophosphatase                                 | 448  | 6  | 243  | 167  | 0.1371 | -2.41 | 36  | 14.92  | 3.18   | 17.97  | 0.00   | 87  | 29.82  | 19.05  | 18.23  | 19.68  |
| Q8VCR7 | Abhydrolase domain-containing protein 14B                            | 259  | 4  | 20   | 1479 | 0.7617 | -1.07 | 4   | 1.07   | 1.06   | 1.71   | 0.00   | 4   | 0.00   | 0.00   | 0.00   | 4.10   |
| Q8K021 | Secretory carrier-associated membrane protein 1                      | 217  | 3  | 127  | 155  | 0.1152 | -2.30 | 18  | 6.39   | 4.24   | 5.99   | 1.62   | 42  | 6.88   | 7.45   | 14.58  | 13.12  |
| P61027 | Ras-related protein Rab-10                                           | 361  | 5  | 212  | 455  | 0.2295 | -1.46 | 45  | 13.85  | 10.60  | 9.41   | 11.32  | 66  | 15.29  | 9.11   | 16.04  | 25.42  |
| Q3UV17 | Keratin, type II cytoskeletal 2 oral                                 | 101  | 2  | 88   | 693  | 0.3975 | -1.82 | 14  | 3.20   | 1.06   | 5.14   | 4.85   | 26  | 7.65   | 10.77  | 5.10   | 2.46   |
| Q9DBJ1 | Phosphoglycerate mutase 1                                            | 935  | 13 | 981  | 138  | 0.1308 | -1.38 | 208 | 54.35  | 44.50  | 50.49  | 58.20  | 286 | 87.92  | 70.40  | 44.48  | 83.65  |
| Q92019 | WD repeat-containing protein 7                                       | 669  | 11 | 162  | 623  | 0.3070 | 1.28  | 57  | 20.25  | 10.60  | 17.97  | 8.08   | 44  | 13.00  | 8.28   | 12.40  | 10.66  |
| Q9ESN9 | C-Jun-amino-terminal kinase-interacting protein 3                    | 172  | 3  | 4    | 1446 | 0.6637 | -1.86 | 1   | 0.00   | 0.00   | 0.86   | 0.00   | 2   | 0.76   | 0.83   | 0.00   | 0.00   |
| P60469 | Liprin-alpha-3                                                       | 268  | 5  | 11   | 1475 | 0.8189 | -1.92 | 3   | 0.00   | 1.06   | 1.71   | 0.00   | 5   | 4.59   | 0.00   | 0.73   | 0.00   |
| P19258 | Protein Mpv17                                                        | 222  | 3  | 8    | 788  | 0.0896 | -5.34 | 0   | 0.00   | 0.00   | 0.00   | 0.00   | 5   | 3.06   | 0.00   | 1.46   | 0.82   |
| P24529 | Tyrosine 3-monooxygenase                                             | 174  | 3  | 29   | 1119 | 0.6542 | -1.62 | 9   | 0.00   | 4.24   | 3.42   | 1.62   | 15  | 5.35   | 0.83   | 1.46   | 7.38   |
| P35293 | Ras-related protein Rab-18                                           | 553  | 8  | 259  | 153  | 0.0324 | -1.34 | 65  | 15.99  | 14.83  | 14.55  | 19.40  | 87  | 18.35  | 19.05  | 24.07  | 25.42  |
| O70251 | Elongation factor 1-beta                                             | 300  | 4  | 226  | 825  | 0.5289 | 1.11  | 67  | 15.99  | 16.95  | 16.26  | 17.78  | 60  | 25.23  | 6.63   | 14.58  | 13.94  |
| Q61171 | Peroxisomal protein 2                                                | 682  | 10 | 1050 | 576  | 0.4738 | -1.13 | 272 | 75.66  | 41.33  | 75.31  | 79.22  | 305 | 63.46  | 73.71  | 70.74  | 97.59  |
| Q9QXB9 | Developmentally-regulated GTP-binding protein 2                      | 142  | 2  | 8    | 1310 | 0.1824 | -1.56 | 0   | 0.00   | 0.00   | 0.00   | 0.00   | 2   | 0.00   | 0.83   | 0.73   | 0.00   |
| Q61035 | Histidyl-tRNA synthetase, cytoplasmic                                | 253  | 4  | 45   | 1465 | 0.8705 | 1.04  | 11  | 2.13   | 1.06   | 5.99   | 1.62   | 10  | 3.82   | 1.66   | 0.00   | 4.92   |
| P70175 | Disks large homolog 3                                                | 314  | 5  | 56   | 537  | 0.1385 | -2.74 | 7   | 2.13   | 1.06   | 4.28   | 0.00   | 20  | 2.29   | 6.63   | 5.83   | 5.74   |
| P09671 | Superoxide dismutase [Mn], mitochondrial                             | 298  | 4  | 534  | 271  | 0.2060 | -1.50 | 113 | 36.23  | 22.25  | 25.68  | 29.10  | 170 | 52.75  | 19.05  | 32.82  | 65.61  |
| P84075 | Neuron-specific calcium-binding protein hippocalcin                  | 292  | 4  | 204  | 1254 | 0.7255 | -1.01 | 63  | 14.92  | 7.42   | 8.56   | 32.33  | 64  | 9.17   | 14.91  | 18.23  | 21.32  |
| Q60829 | Protein phosphatase 1 regulatory subunit 1B                          | 185  | 3  | 151  | 949  | 0.7331 | -1.21 | 36  | 6      |        |        |        |     |        |        |        |        |

|        |                                                                     |      |    |      |      |        |       |     |       |       |       |       |     |       |       |       |        |
|--------|---------------------------------------------------------------------|------|----|------|------|--------|-------|-----|-------|-------|-------|-------|-----|-------|-------|-------|--------|
| Q8CGF6 | WD repeat-containing protein 47                                     | 128  | 2  | 10   | 797  | 0.1172 | 7.96  | 7   | 3.20  | 0.00  | 1.71  | 1.62  | 1   | 0.00  | 0.00  | 0.00  | 0.82   |
| Q9CRC9 | Glucosamine-6-phosphate isomerase 2                                 | 244  | 4  | 33   | 687  | 0.3152 | -2.93 | 4   | 0.00  | 2.12  | 0.00  | 1.62  | 11  | 6.12  | 0.83  | 0.73  | 3.28   |
| Q9D6G9 | CKLF-like MARVEL transmembrane domain-containing protein 5          | 202  | 3  | 24   | 1142 | 0.2118 | -3.02 | 0   | 0.00  | 0.00  | 0.00  | 0.00  | 3   | 0.00  | 0.83  | 2.19  | 0.00   |
| Q9CZT8 | Ras-related protein Rab-3B                                          | 434  | 6  | 490  | 1005 | 0.9077 | -1.10 | 113 | 19.18 | 36.03 | 29.10 | 29.10 | 124 | 30.58 | 14.08 | 37.19 | 42.64  |
| P45878 | Peptidyl-prolyl cis-trans isomerase FKBP2                           | 322  | 5  | 106  | 1422 | 0.8153 | -1.12 | 29  | 7.46  | 3.18  | 2.57  | 16.17 | 33  | 13.76 | 0.00  | 5.10  | 13.94  |
| P04104 | Keratin, type II cytoskeletal 1                                     | 153  | 2  | 163  | 552  | 0.2285 | -5.52 | 12  | 3.20  | 5.30  | 1.71  | 1.62  | 65  | 16.06 | 33.13 | 16.04 | 0.00   |
| Q3TTY5 | Keratin, type II cytoskeletal 2 epidermal                           | 142  | 2  | 39   | 1492 | 0.9250 | 1.06  | 10  | 2.13  | 2.12  | 0.86  | 4.85  | 9   | 2.29  | 3.31  | 2.19  | 1.64   |
| Q9CQ16 | Coactosin-like protein                                              | 215  | 3  | 150  | 1433 | 0.9137 | -1.14 | 47  | 7.46  | 13.78 | 7.70  | 17.78 | 53  | 27.52 | 2.48  | 10.21 | 13.12  |
| O35969 | Guanidinoacetate N-methyltransferase                                | 219  | 3  | 50   | 66   | 0.0978 | -2.46 | 9   | 4.26  | 0.00  | 4.28  | 0.00  | 21  | 5.35  | 4.97  | 6.56  | 4.10   |
| Q7TPM6 | Fibronectin type III and SPRY domain-containing protein 1           | 217  | 3  | 27   | 467  | 0.1640 | -5.92 | 2   | 0.00  | 1.06  | 0.86  | 0.00  | 11  | 0.00  | 4.14  | 1.46  | 5.74   |
| P18760 | Cofilin-1                                                           | 716  | 10 | 1123 | 62   | 0.0664 | -1.43 | 248 | 78.86 | 47.68 | 65.04 | 56.59 | 355 | 82.57 | 65.43 | 97.72 | 109.07 |
| P49615 | Cell division protein kinase 5                                      | 374  | 6  | 99   | 1366 | 0.8400 | 1.01  | 31  | 15.99 | 6.36  | 3.42  | 4.85  | 30  | 6.12  | 12.42 | 4.38  | 7.38   |
| P68404 | Protein kinase C beta type                                          | 458  | 7  | 157  | 779  | 0.2712 | 1.35  | 51  | 14.92 | 9.54  | 15.41 | 11.32 | 38  | 12.23 | 3.31  | 5.83  | 16.40  |
| Q61016 | Guanine nucleotide-binding protein G(I)/G(S)/G(O) subunit gamma-7   | 170  | 3  | 52   | 1502 | 0.8757 | 1.46  | 1   | 1.07  | 0.00  | 0.00  | 0.00  | 1   | 0.00  | 0.00  | 0.73  | 0.00   |
| Q3UHQ0 | AP2-associated protein kinase 1                                     | 665  | 10 | 147  | 1227 | 0.8375 | 1.22  | 40  | 13.85 | 11.66 | 14.55 | 0.00  | 33  | 5.35  | 5.80  | 9.48  | 12.30  |
| P60824 | Cold-inducible RNA-binding protein                                  | 277  | 4  | 89   | 715  | 0.1288 | -1.61 | 20  | 6.39  | 1.06  | 0.86  | 11.32 | 32  | 7.65  | 5.80  | 5.83  | 12.30  |
| P02535 | Keratin, type I cytoskeletal 10                                     | 240  | 3  | 128  | 287  | 0.2054 | -6.95 | 6   | 0.00  | 4.24  | 0.00  | 1.62  | 41  | 14.53 | 17.39 | 8.75  | 0.00   |
| P60904 | DnaJ homolog subfamily C member 5                                   | 187  | 3  | 252  | 1017 | 0.6776 | -1.00 | 59  | 14.92 | 10.60 | 12.84 | 21.02 | 59  | 17.58 | 4.97  | 13.86 | 22.96  |
| Q64436 | Potassium-transporting ATPase alpha chain 1                         | 241  | 4  | 95   | 717  | 0.4215 | -1.79 | 9   | 3.20  | 3.18  | 2.57  | 0.00  | 16  | 3.06  | 4.97  | 1.46  | 6.56   |
| Q92212 | Peptidyl-prolyl cis-trans isomerase FKBP1B                          | 132  | 2  | 11   | 1428 | 0.3910 | -1.53 | 0   | 0.00  | 0.00  | 0.00  | 0.00  | 2   | 1.53  | 0.00  | 0.00  | 0.00   |
| Q91VW3 | SH3 domain-binding glutamic acid-rich-like protein 3                | 258  | 4  | 90   | 754  | 0.2235 | -1.87 | 9   | 8.53  | 0.00  | 0.00  | 0.00  | 16  | 4.59  | 2.48  | 8.02  | 0.82   |
| Q9CQA1 | Trafficking protein particle complex subunit 5                      | 186  | 3  | 23   | 1459 | 0.6343 | 1.36  | 7   | 2.13  | 1.06  | 0.86  | 3.23  | 5   | 0.76  | 1.66  | 2.92  | 0.00   |
| Q9Z268 | RasGAP-activating-like protein 1                                    | 404  | 7  | 66   | 1338 | 0.9766 | 1.45  | 18  | 0.00  | 0.00  | 8.56  | 9.70  | 13  | 2.29  | 0.00  | 2.92  | 7.38   |
| Q9CQX8 | 28S ribosomal protein S36, mitochondrial                            | 214  | 3  | 53   | 932  | 0.5832 | -1.12 | 13  | 4.26  | 4.24  | 2.57  | 1.62  | 14  | 3.06  | 4.14  | 2.92  | 4.10   |
| Q9DB27 | Malignant T cell-amplified sequence 1                               | 151  | 2  | 16   | 1341 | 0.6452 | -4.47 | 1   | 0.00  | 0.00  | 0.86  | 0.00  | 4   | 3.82  | 0.00  | 0.00  | 0.00   |
| Q9R0P5 | Dextrin                                                             | 579  | 8  | 437  | 94   | 0.0164 | -1.60 | 90  | 27.71 | 12.72 | 18.83 | 30.72 | 144 | 35.93 | 27.33 | 33.55 | 47.56  |
| O55100 | Synaptogyrin-1                                                      | 130  | 2  | 70   | 90   | 0.0554 | -2.39 | 10  | 3.20  | 1.06  | 2.57  | 3.23  | 24  | 4.59  | 5.80  | 8.75  | 4.92   |
| Q8BH55 | Threonine synthase-like 1                                           | 214  | 3  | 25   | 1531 | 0.8413 | 1.07  | 7   | 0.00  | 5.30  | 1.71  | 0.00  | 7   | 0.76  | 3.31  | 0.00  | 2.46   |
| P42859 | Huntingtin                                                          | 700  | 11 | 53   | 523  | 0.1038 | -2.40 | 11  | 3.20  | 5.30  | 0.86  | 1.62  | 26  | 9.94  | 13.25 | 1.46  | 1.64   |
| P97461 | 40S ribosomal protein S5                                            | 170  | 3  | 47   | 1402 | 0.9283 | 1.22  | 15  | 6.39  | 0.00  | 2.57  | 6.47  | 13  | 3.06  | 0.83  | 2.19  | 6.56   |
| Q9QYB8 | Beta-adducin                                                        | 638  | 9  | 186  | 593  | 0.3291 | -1.98 | 31  | 0.00  | 21.19 | 10.27 | 0.00  | 62  | 10.70 | 4.14  | 19.69 | 27.88  |
| Q60631 | Growth factor receptor-bound protein 2                              | 329  | 5  | 129  | 486  | 0.3239 | -1.58 | 23  | 12.79 | 4.24  | 5.99  | 0.00  | 36  | 8.41  | 9.11  | 7.29  | 11.48  |
| O35658 | Complement component 1 Q subcomponent-binding protein, mitochondria | 467  | 7  | 243  | 357  | 0.1340 | -1.25 | 56  | 17.05 | 7.42  | 8.56  | 22.63 | 70  | 17.58 | 14.08 | 10.21 | 27.88  |
| P23927 | Alpha-crystallin B chain                                            | 372  | 5  | 328  | 1093 | 0.8131 | 1.01  | 92  | 17.05 | 13.78 | 22.25 | 38.80 | 91  | 24.46 | 7.45  | 28.44 | 30.34  |
| Q8K0T0 | Reticulon-1                                                         | 853  | 12 | 455  | 1038 | 0.8558 | -1.04 | 131 | 30.90 | 27.55 | 33.38 | 38.80 | 136 | 49.69 | 14.08 | 32.09 | 40.18  |
| O88441 | Metaxin-2                                                           | 493  | 8  | 140  | 255  | 0.1830 | -1.93 | 21  | 2.13  | 11.66 | 5.99  | 1.62  | 41  | 9.94  | 7.45  | 11.67 | 12.30  |
| Q9CYW4 | Haloacid dehalogenase-like hydrolase domain-containing protein 3    | 173  | 3  | 32   | 434  | 0.2065 | -2.27 | 5   | 2.13  | 1.06  | 1.71  | 0.00  | 11  | 1.53  | 4.97  | 2.19  | 2.46   |
| P47708 | Rabphilin-3A                                                        | 405  | 6  | 189  | 980  | 0.2608 | -1.19 | 52  | 8.53  | 7.42  | 6.85  | 29.10 | 62  | 11.47 | 16.56 | 12.40 | 21.32  |
| A2AN08 | E3 ubiquitin-protein ligase UBR4                                    | 1184 | 19 | 112  | 781  | 0.8817 | -1.70 | 21  | 7.46  | 3.18  | 4.28  | 6.47  | 36  | 25.99 | 5.80  | 2.92  | 1.64   |
| Q6NS52 | Dialkylglycerol kinase beta                                         | 165  | 3  | 8    | 1377 | 0.6346 | 2.62  | 4   | 3.20  | 0.00  | 0.86  | 0.00  | 2   | 0.00  | 0.00  | 0.73  | 0.82   |
| Q62433 | Protein NDRG1                                                       | 548  | 8  | 64   | 402  | 0.0103 | -8.79 | 2   | 0.00  | 0.00  | 1.71  | 0.00  | 15  | 1.53  | 2.48  | 10.21 | 0.82   |
| Q5PR73 | GTP-binding protein Di-Ras2                                         | 451  | 7  | 188  | 88   | 0.0416 | -2.31 | 31  | 17.05 | 4.24  | 5.99  | 3.23  | 71  | 21.41 | 19.05 | 14.58 | 15.58  |
| Q9DBS2 | Tumor protein p63-regulated gene 1-like protein                     | 326  | 5  | 76   | 1277 | 0.8233 | 1.14  | 21  | 8.53  | 3.18  | 2.57  | 6.47  | 18  | 4.59  | 7.45  | 2.92  | 3.28   |
| Q9CQZ6 | NADH dehydrogenase [ubiquinone] 1 beta subcomplex subunit 3         | 152  | 3  | 62   | 559  | 0.0078 | -2.36 | 6   | 5.33  | 0.00  | 0.86  | 0.00  | 15  | 9.94  | 1.66  | 2.19  | 0.82   |
| Q9QW16 | SRC kinase signaling inhibitor 1                                    | 513  | 8  | 64   | 16   | 0.0381 | 4.50  | 27  | 6.39  | 6.36  | 5.99  | 8.08  | 6   | 0.76  | 0.00  | 4.38  | 0.82   |
| Q9R1Z7 | 6-pyruvoyl tetrahydrobiopterin synthase                             | 172  | 3  | 17   | 1303 | 0.4987 | -3.75 | 2   | 0.00  | 0.00  | 0.86  | 1.62  | 9   | 6.88  | 1.66  | 0.73  | 0.00   |
| P62743 | AP-2 complex subunit sigma                                          | 320  | 5  | 214  | 316  | 0.0911 | -2.21 | 42  | 18.12 | 6.36  | 1.71  | 16.17 | 94  | 32.11 | 9.94  | 18.96 | 32.80  |
| Q9CQW1 | Synaptobrevin homolog YKT6                                          | 405  | 6  | 125  | 547  | 0.1149 | -2.33 | 20  | 5.33  | 2.12  | 11.13 | 1.62  | 47  | 7.65  | 9.94  | 13.13 | 16.40  |
| Q9Z2H2 | Regulator of G-protein signaling 6                                  | 131  | 2  | 6    | 1181 | 0.2028 | -2.40 | 0   | 0.00  | 0.00  | 0.00  | 0.00  | 2   | 0.76  | 0.00  | 0.00  | 1.64   |
| Q9DBL1 | Short/branched chain specific acyl-CoA dehydrogenase, mitochondrial | 253  | 4  | 44   | 503  | 0.1380 | -3.06 | 4   | 1.07  | 1.06  | 1.71  | 0.00  | 12  | 4.59  | 4.97  | 2.19  | 0.00   |
| Q3UHD9 | Arf-GAP with GTPase, ANK repeat and PH domain-containing protein    | 296  | 5  | 76   | 853  | 0.4202 | -1.47 | 12  | 5.33  | 2.12  | 2.57  | 1.62  | 17  | 3.82  | 1.66  | 5.10  | 6.56   |
| Q3UNH4 | G protein-regulated inducer of neurite outgrowth 1                  | 270  | 4  | 30   | 1496 | 0.8087 | -1.18 | 7   | 4.26  | 1.06  | 1.71  | 0.00  | 8   | 3.82  | 0.00  | 3.65  | 0.82   |
| Q9D7A8 | Armadillo repeat-containing protein 1                               | 188  | 3  | 20   | 490  | 0.0629 | -9.35 | 0   | 0.00  | 0.00  | 0.00  | 0.00  | 9   | 3.06  | 0.00  | 2.19  | 4.10   |
| Q922U2 | Keratin, type II cytoskeletal 5                                     | 113  | 2  | 7    | 1198 | 0.2021 | -2.26 | 0   | 0.00  | 0.00  | 0.00  | 0.00  | 2   | 1.53  | 0.00  | 0.73  | 0.00   |
| Q8CG72 | Poly(ADP-ribose) glycohydrolase ARH3                                | 289  | 5  | 104  | 512  | 0.2442 | -1.38 | 20  | 4.26  | 6.36  | 5.99  | 3.23  | 27  | 4.59  | 5.80  | 8.75  | 8.20   |
| O35465 | Peptidyl-prolyl cis-trans isomerase FKBP8                           | 164  | 3  | 3    | 1559 | ?      | 0.00  | 0   | 0.00  | 0.00  | 0.00  | 0.00  | 0   | 0.00  | 0.00  | 0.00  | 0.00   |
| Q9DCM2 | Glutathione S-transferase kappa 1                                   | 192  | 3  | 47   | 434  | 0.2168 | -2.35 | 8   | 3.20  | 0.00  | 5.14  | 0.00  | 20  | 2.29  | 2.48  | 6.56  | 8.20   |
| P47934 | Carnitine O-acetyltransferase                                       | 122  | 2  | 23   | 1454 | 0.7809 | 1.57  | 7   | 2.13  | 4.24  | 0.86  | 0.00  | 5   | 0.76  | 0.00  | 2.19  | 1.64   |
| Q3UX10 | Tubulin alpha chain-like 3                                          | 186  | 3  | 44   | 356  | 0.0798 | -7.31 | 2   | 1.07  | 1.06  | 0.00  | 0.00  | 16  | 8.41  | 0.83  | 2.19  | 4.10   |
| Q9QZ23 | NFU1 iron-sulfur cluster scaffold homolog, mitochondrial            | 200  | 3  | 71   | 67   | 0.0915 | -3.52 | 9   | 2.13  | 2.12  | 4.28  | 0.00  | 30  | 7.65  | 7.45  | 5.10  | 9.84   |
| Q8BGZ1 | Hippocalcin-like protein 4                                          | 779  | 11 | 324  | 635  | 0.2502 | -1.37 | 78  | 22.38 | 12.72 | 11.98 | 30.72 | 106 | 20.64 | 12.42 | 23.34 | 50.03  |
| Q9D8W7 | OCL1 domain-containing protein 2                                    | 301  | 3  | 36   | 1014 | 0.0952 | -2.85 | 3   | 0.00  | 0.00  | 1.71  | 1.62  | 9   | 0.00  | 0.83  | 2.92  | 5.74   |
| P12367 | cAMP-dependent protein kinase type II-alpha regulatory subunit      | 233  | 4  | 70   | 473  | 0.1916 | -1.95 | 10  | 1.07  | 2.12  | 5.14  | 1.62  | 19  | 7.65  | 2.48  | 5.10  | 4.10   |
| Q9DD18 | D-tyrosyl-tRNA(Tyr) deacylase 1                                     | 161  | 2  | 74   | 634  | 0.3729 | 1.35  | 21  | 6.39  | 3.18  | 5.14  | 6.47  | 16  | 3.06  | 4.97  | 4.38  | 3.28   |
| Q8OZ24 | Neuronal growth regulator 1                                         | 251  | 4  | 80   | 289  | 0.0882 | -1.48 | 15  | 4.26  | 2.12  | 3.42  | 4.85  | 22  | 6.12  | 2.48  | 7.29  | 5.74   |
| P70333 | Heterogeneous nuclear ribonucleoprotein H2                          | 267  | 4  | 41   | 473  | 0.0593 | -2.33 | 5   | 1.07  | 0.00  | 2.57  | 1.62  | 12  | 1.53  | 1.66  | 6.56  | 2.46   |
| O08917 | Flotillin-1                                                         | 610  | 9  | 50   | 1348 | 0.3193 | 1.72  | 6   | 1.07  | 1.06  | 4.28  | 0.00  | 4   | 1.53  | 0.00  | 2.19  | 0.00   |
| A2AG50 | MAP7 domain-containing protein 2                                    | 220  | 4  | 100  | 931  | 0.3430 | 1.58  | 33  | 3.20  | 9.54  | 2.57  | 17.78 | 21  | 4.59  | 8.28  | 1.46  | 6.56   |
| Q64520 | Guanylate kinase                                                    | 350  | 5  | 78   | 133  | 0.1612 | -3.19 | 12  | 8.53  | 0.00  | 3.42  | 0.00  | 38  | 5.35  | 10.77 | 8.02  | 13.94  |
| P60766 | Cell division control protein 42 homolog                            | 472  | 7  | 461  | 330  | 0.1515 | -1.34 | 99  | 30.90 | 19.07 | 21.40 | 27.48 | 132 | 32.87 | 19.88 | 40.84 | 38.54  |
| Q8BW96 | Calcium/calmodulin-dependent protein kinase type 1D                 | 179  | 3  | 16   | 585  | 0.1098 | -5.46 | 1   | 0.00  | 0.00  | 0.86  | 0.00  | 5   | 2.29  | 0.83  | 0.73  | 0.82   |
| Q91VC7 | Protein phosphatase 1 regulatory subunit 14A                        | 206  | 3  | 29   | 704  | 0.3011 | -2.55 | 6   | 0.00  | 0.00  | 0.86  | 4.85  | 15  | 7.65  | 0.00  | 3.65  | 3.28   |
| Q9QYX7 | Protein piccolo                                                     | 730  | 12 | 68   | 1198 | 0.8395 | 1.27  | 11  | 3.20  | 4.24  | 3.42  | 0.00  | 9   | 3.06  | 0.00  | 2.19  | 3.28   |
| Q9QYA2 | Mitochondrial import receptor subunit TOM40 homolog                 | 224  | 3  | 16   | 1538 | 0.9120 | 1.21  | 2   | 0.00  | 1.06  | 0.86  | 0.00  | 2   | 0.76  | 0.00  | 0.00  | 0.82   |
| P08122 | Collagen alpha-2(IV)                                                |      |    |      |      |        |       |     |       |       |       |       |     |       |       |       |        |

|        |                                                   |     |   |    |      |        |       |   |      |      |      |      |    |       |       |      |       |
|--------|---------------------------------------------------|-----|---|----|------|--------|-------|---|------|------|------|------|----|-------|-------|------|-------|
| Q9QYS2 | Metabotropic glutamate receptor 3                 | 181 | 3 | 39 | 1314 | 0.7880 | -1.31 | 9 | 1.07 | 3.18 | 5.14 | 0.00 | 12 | 6.12  | 0.00  | 2.92 | 3.28  |
| Q5H8C4 | Vacuolar protein sorting-associated protein 13A   | 199 | 3 | 19 | 934  | 0.3933 | 1.59  | 6 | 1.07 | 1.06 | 2.57 | 1.62 | 4  | 0.76  | 2.48  | 0.73 | 0.00  |
| P70195 | Proteasome subunit beta type-7                    | 304 | 5 | 59 | 355  | 0.0551 | -4.47 | 6 | 2.13 | 1.06 | 0.86 | 1.62 | 25 | 10.70 | 2.48  | 1.46 | 10.66 |
| Q8R570 | Synaptosomal-associated protein 47                | 274 | 5 | 20 | 945  | 0.3300 | -1.30 | 5 | 0.00 | 0.00 | 0.00 | 4.85 | 6  | 1.53  | 1.66  | 1.46 | 1.64  |
| Q8R404 | Protein QIL1                                      | 150 | 2 | 28 | 1512 | 0.9491 | -1.42 | 4 | 0.00 | 1.06 | 0.00 | 3.23 | 6  | 6.12  | 0.00  | 0.00 | 0.00  |
| P56565 | Protein S100-A1                                   | 172 | 3 | 16 | 1499 | 0.3910 | 1.07  | 1 | 1.07 | 0.00 | 0.00 | 0.00 | 0  | 0.00  | 0.00  | 0.00 | 0.00  |
| Q8CGA0 | Protein phosphatase 1F                            | 174 | 3 | 19 | 463  | 0.0239 | -6.37 | 0 | 0.00 | 0.00 | 0.00 | 0.00 | 6  | 1.53  | 0.83  | 0.73 | 3.28  |
| P56371 | Ras-related protein Rab-4A                        | 179 | 3 | 17 | 771  | 0.0906 | -6.95 | 0 | 0.00 | 0.00 | 0.00 | 0.00 | 7  | 0.00  | 2.48  | 3.65 | 0.82  |
| Q9R0Q3 | Transmembrane emp24 domain-containing protein 2   | 283 | 4 | 31 | 1032 | 0.6263 | -1.80 | 6 | 0.00 | 3.18 | 0.86 | 1.62 | 10 | 3.06  | 0.00  | 2.19 | 4.92  |
| P61211 | ADP-ribosylation factor-like protein 1            | 242 | 4 | 39 | 320  | 0.1892 | -3.58 | 4 | 0.00 | 0.00 | 0.86 | 3.23 | 15 | 6.88  | 0.00  | 3.65 | 4.10  |
| Q4ACU6 | SH3 and multiple ankyrin repeat domains protein 3 | 269 | 5 | 16 | 1095 | 0.2173 | 4.49  | 4 | 1.07 | 0.00 | 3.42 | 0.00 | 0  | 0.00  | 0.00  | 0.00 | 0.00  |
| Q9JH5  | Isovaleryl-CoA dehydrogenase, mitochondrial       | 516 | 9 | 47 | 177  | 0.0538 | -4.89 | 5 | 0.00 | 2.12 | 2.57 | 0.00 | 23 | 6.88  | 10.77 | 3.65 | 1.64  |

Supplemental Table 1. Normalized spectral counts and rankings for the 1,567 proteins identified.

<sup>a</sup>Identifiers (ID) were derived from [www.uniprot.org](http://www.uniprot.org)

<sup>b</sup>Total protein score represents the sum of non-redundant peptide MASCOT ion scores with  $\leq 1\%$  FDR derived from ProteoIQ's implementation of the PROVALT algorithm (Reference #31).

<sup>c</sup>The total number of unique peptides (e.g. those peptides with distinct  $m/z$  values) were tabulated cumulatively from all of the samples analyzed

<sup>d</sup>the total number of assigned spectra were tabulated cumulatively from all of the samples analyzed.

<sup>e</sup>Proteins were sorted according to the rankings of the amyloid dataset. Proteins were ranked based upon the lowest p-value, highest fold change, best count combination and lowest coefficient of variation.

<sup>f</sup>Normalized spectral counts, as described in methods, are shown for each of the 4 biological replicates from our 4 sample groups [Tg44 anchorless RML-infected mice with amyloid deposition (Tg-Sc);

Tg44 uninfected mice (Tg-U); C57BL/10 wild-type RML-infected mice with spongiform degeneration (C57-Sc); C57BL/10 uninfected mice (C57-U)].
