# Supplementary material
Source: PubMed Central journal article supplement (PMC4227561)
Supplement: pr500329w_si_003.pdf [file pr500329w_si_003.pdf]

Top 100 ranked proteins in the amyloid disease phenotype

| ID     | Sequence Name                                                                     | Total Unique Peptides | Total SpC | Amyloid (Tg44) Rank | Amyloid Δ-fold |
|--------|-----------------------------------------------------------------------------------|-----------------------|-----------|---------------------|----------------|
| P04925 | Major prion protein                                                               | 12                    | 1569      | 36                  | 90.97          |
| P51910 | Apolipoprotein D                                                                  | 4                     | 59        | 55                  | 56.23          |
| O35639 | Annexin A3                                                                        | 8                     | 58        | 15                  | 49.45          |
| P07356 | Annexin A2                                                                        | 8                     | 51        | 14                  | 42.66          |
| Q91X72 | Hemopexin                                                                         | 8                     | 94        | 2                   | 23.08          |
| Q61233 | Plastin-2                                                                         | 7                     | 19        | 16                  | 20.40          |
| Q02105 | Complement C1q subcomponent subunit C                                             | 3                     | 49        | 8                   | 17.66          |
| P29699 | Alpha-2-HS-glycoprotein                                                           | 5                     | 45        | 20                  | 13.65          |
| P20152 | Vimentin                                                                          | 20                    | 848       | 66                  | 11.87          |
| Q9DCL9 | Multifunctional protein ADE2                                                      | 3                     | 23        | 18                  | 11.34          |
| Q3TEA8 | Heterochromatin protein 1-binding protein 3                                       | 3                     | 28        | 25                  | 11.02          |
| P07759 | Serine protease inhibitor A3K                                                     | 2                     | 26        | 29                  | 10.00          |
| P98086 | Complement C1q subcomponent subunit A                                             | 3                     | 91        | 7                   | 9.37           |
| Q8K010 | 5-oxoprolinase                                                                    | 9                     | 79        | 24                  | 9.35           |
| O35874 | Neutral amino acid transporter A                                                  | 4                     | 86        | 3                   | 9.23           |
| P28650 | Adenylosuccinate synthetase isozyme 1                                             | 3                     | 36        | 19                  | 8.90           |
| Q06890 | Clusterin                                                                         | 6                     | 72        | 3                   | 8.19           |
| P14106 | Complement C1q subcomponent subunit B                                             | 5                     | 148       | 32                  | 7.82           |
| P08226 | Apolipoprotein E                                                                  | 11                    | 527       | 5                   | 7.55           |
| P61148 | Heparin-binding growth factor 1                                                   | 2                     | 41        | 47                  | 7.38           |
| Q5SUR0 | Phosphoribosylformylglycinamide synthase                                          | 12                    | 128       | 6                   | 7.08           |
| P97371 | Proteasome activator complex subunit 1                                            | 3                     | 37        | 34                  | 6.23           |
| Q9Z1Q9 | Valyl-tRNA synthetase                                                             | 10                    | 100       | 79                  | 6.09           |
| Q61838 | Alpha-2-macroglobulin                                                             | 18                    | 344       | 28                  | 5.99           |
| P23116 | Eukaryotic translation initiation factor 3 subunit A                              | 4                     | 98        | 44                  | 5.80           |
| P03995 | Glial fibrillary acidic protein                                                   | 22                    | 2036      | 1                   | 5.78           |
| Q8R3P0 | Aspartoacylase                                                                    | 3                     | 72        | 26                  | 5.45           |
| Q8BTM8 | Filamin-A                                                                         | 16                    | 158       | 49                  | 5.36           |
| Q00493 | Carboxypeptidase E                                                                | 4                     | 57        | 38                  | 5.16           |
| Q8BJI1 | Orphan sodium- and chloride-dependent neurotransmitter transporter N <sup>o</sup> | 3                     | 45        | 51                  | 5.01           |
| P13020 | Gelsolin                                                                          | 7                     | 138       | 45                  | 4.92           |
| Q78PY7 | Staphylococcal nuclease domain-containing protein 1                               | 8                     | 122       | 30                  | 4.67           |
| Q99K51 | Plastin-3                                                                         | 8                     | 91        | 48                  | 4.49           |
| Q8QZS1 | 3-hydroxyisobutyryl-CoA hydrolase, mitochondrial                                  | 10                    | 97        | 63                  | 4.47           |
| Q9CPW4 | Actin-related protein 2/3 complex subunit 5                                       | 3                     | 95        | 35                  | 4.47           |
| Q00612 | Glucose-6-phosphate 1-dehydrogenase X                                             | 3                     | 18        | 46                  | 4.46           |
| Q921I1 | Serotransferrin                                                                   | 26                    | 463       | 9                   | 4.46           |
| Q9CZD3 | Glycyl-tRNA synthetase                                                            | 9                     | 118       | 37                  | 4.06           |
| P50544 | Very long-chain specific acyl-CoA dehydrogenase, mitochondrial                    | 13                    | 138       | 96                  | 3.72           |
| Q9Z1Q5 | Chloride intracellular channel protein 1                                          | 4                     | 47        | 59                  | 3.68           |
| Q6PHS9 | Voltage-dependent calcium channel subunit alpha-2/delta-2                         | 8                     | 81        | 53                  | 3.44           |
| Q922D8 | C-1-tetrahydrofolate synthase, cytoplasmic                                        | 10                    | 89        | 54                  | 3.43           |
| Q60854 | Serpin B6                                                                         | 3                     | 22        | 70                  | 3.41           |
| Q01405 | Protein transport protein Sec23A                                                  | 7                     | 48        | 49                  | 3.38           |
| Q6WVG3 | BTB/POZ domain-containing protein KCTD12                                          | 6                     | 59        | 85                  | 3.37           |
| P13707 | Glycerol-3-phosphate dehydrogenase [NAD <sup>+</sup> ], cytoplasmic               | 11                    | 255       | 82                  | 3.20           |
| P47199 | Quinone oxidoreductase                                                            | 4                     | 67        | 85                  | 3.02           |
| Q61292 | Laminin subunit beta-2                                                            | 12                    | 102       | 70                  | 3.01           |
| Q922B2 | Aspartyl-tRNA synthetase, cytoplasmic                                             | 7                     | 104       | 80                  | 3.00           |

Top 100 ranked proteins in the amyloid disease phenotype

|        |                                                                  |    |      |     |        |
|--------|------------------------------------------------------------------|----|------|-----|--------|
| Q8R0Y6 | 10-formyltetrahydrofolate dehydrogenase                          | 27 | 497  | 33  | 2.86   |
| Q64331 | Myosin-VI                                                        | 10 | 104  | 62  | 2.86   |
| Q91WC3 | Long-chain-fatty-acid--CoA ligase 6                              | 15 | 295  | 90  | 2.80   |
| P08003 | Protein disulfide-isomerase A4                                   | 7  | 67   | 94  | 2.68   |
| P18242 | Cathepsin D                                                      | 8  | 328  | 43  | 2.54   |
| Q91ZX7 | Prolow-density lipoprotein receptor-related protein 1            | 45 | 803  | 13  | 2.50   |
| O35136 | Neural cell adhesion molecule 2                                  | 4  | 86   | 81  | 2.47   |
| Q99L04 | Dehydrogenase/reductase SDR family member 1                      | 10 | 272  | 78  | 2.25   |
| Q9CZX8 | 40S ribosomal protein S19                                        | 4  | 99   | 97  | 2.13   |
| O88343 | Electrogenic sodium bicarbonate cotransporter 1                  | 7  | 377  | 97  | 2.08   |
| Q9DCN2 | NADH-cytochrome b5 reductase 3                                   | 11 | 260  | 40  | 1.99   |
| Q61330 | Contactin-2                                                      | 13 | 165  | 92  | 1.91   |
| P26443 | Glutamate dehydrogenase 1, mitochondrial                         | 27 | 1561 | 99  | 1.59   |
| P48962 | ADP/ATP translocase 1                                            | 11 | 1770 | 88  | -1.39  |
| P61264 | Syntaxin-1B                                                      | 25 | 1925 | 87  | -1.42  |
| Q6PIC6 | Sodium/potassium-transporting ATPase subunit alpha-3             | 31 | 7125 | 73  | -1.43  |
| Q9R0P9 | Ubiquitin carboxyl-terminal hydrolase isozyme L1                 | 19 | 1438 | 77  | -1.50  |
| P60879 | Synaptosomal-associated protein 25                               | 22 | 1711 | 75  | -1.53  |
| P63011 | Ras-related protein Rab-3A                                       | 9  | 1720 | 67  | -1.67  |
| Q60932 | Voltage-dependent anion-selective channel protein 1              | 17 | 2894 | 70  | -1.70  |
| P48774 | Glutathione S-transferase Mu 5                                   | 17 | 515  | 83  | -1.71  |
| Q8BPN8 | DmX-like protein 2                                               | 64 | 1486 | 52  | -1.80  |
| Q7TQD2 | Tubulin polymerization-promoting protein                         | 6  | 1010 | 17  | -1.83  |
| Q9CR62 | Mitochondrial 2-oxoglutarate/malate carrier protein              | 12 | 741  | 60  | -1.86  |
| O08756 | 3-hydroxyacyl-CoA dehydrogenase type-2                           | 8  | 388  | 57  | -1.86  |
| P62761 | Visinin-like protein 1                                           | 16 | 947  | 31  | -1.89  |
| Q9DBJ1 | Phosphoglycerate mutase 1                                        | 13 | 981  | 64  | -1.97  |
| Q61171 | Peroxiredoxin-2                                                  | 10 | 1050 | 22  | -1.98  |
| P09671 | Superoxide dismutase [Mn], mitochondrial                         | 4  | 534  | 58  | -1.99  |
| P01831 | Thy-1 membrane glycoprotein                                      | 6  | 803  | 38  | -2.02  |
| Q91XV3 | Brain acid soluble protein 1                                     | 10 | 1337 | 11  | -2.04  |
| Q63810 | Calcineurin subunit B type 1                                     | 12 | 743  | 65  | -2.04  |
| Q9CQQ7 | ATP synthase subunit b, mitochondrial                            | 11 | 422  | 55  | -2.12  |
| O35526 | Syntaxin-1A                                                      | 16 | 641  | 42  | -2.13  |
| Q9CZT8 | Ras-related protein Rab-3B                                       | 6  | 490  | 21  | -2.28  |
| P18760 | Cofilin-1                                                        | 10 | 1123 | 12  | -2.33  |
| P49615 | Cell division protein kinase 5                                   | 6  | 99   | 100 | -2.35  |
| P60824 | Cold-inducible RNA-binding protein                               | 4  | 89   | 89  | -2.40  |
| P60904 | DnaJ homolog subfamily C member 5                                | 3  | 252  | 91  | -2.42  |
| Q9R0P5 | Destrin                                                          | 8  | 437  | 41  | -2.48  |
| Q60631 | Growth factor receptor-bound protein 2                           | 5  | 129  | 84  | -2.57  |
| O35658 | Complement component 1 Q subcomponent-binding protein, mitochond | 7  | 243  | 76  | -2.57  |
| P47708 | Rabphilin-3A                                                     | 6  | 189  | 95  | -2.68  |
| Q5PR73 | GTP-binding protein Di-Ras2                                      | 7  | 188  | 92  | -2.71  |
| Q9QZ23 | NFU1 iron-sulfur cluster scaffold homolog, mitochondrial         | 3  | 71   | 74  | -3.13  |
| Q8BGZ1 | Hippocalcin-like protein 4                                       | 11 | 324  | 27  | -3.15  |
| A2AG50 | MAP7 domain-containing protein 2                                 | 4  | 100  | 68  | -3.36  |
| P60766 | Cell division control protein 42 homolog                         | 7  | 461  | 22  | -3.45  |
| Q9DB60 | Uncharacterized protein C1orf93 homolog                          | 3  | 53   | 69  | -4.82  |
| Q60634 | Flotillin-2                                                      | 5  | 20   | 61  | -6.25  |
| P61211 | ADP-ribosylation factor-like protein 1                           | 4  | 39   | 10  | -14.58 |

Top 100 ranked proteins in the non-amyloid phenotype

| ID     | Protein                                                                     | Total Unique Peptides | Total SpC | Non-amyloid (C57BL/10) Rank | Non-amyloid $\Delta$ -fold |
|--------|-----------------------------------------------------------------------------|-----------------------|-----------|-----------------------------|----------------------------|
| Q8VCM7 | Fibrinogen gamma chain                                                      | 7                     | 84        | 8                           | 27.87                      |
| Q02105 | Complement C1q subcomponent subunit C                                       | 3                     | 49        | 87                          | 27.62                      |
| P29699 | Alpha-2-HS-glycoprotein                                                     | 5                     | 45        | 81                          | 26.37                      |
| P23242 | Gap junction alpha-1 protein                                                | 6                     | 75        | 92                          | 25.58                      |
| P08905 | Lysozyme C-2                                                                | 2                     | 31        | 2                           | 23.17                      |
| Q9WUA2 | Phenylalanyl-tRNA synthetase beta chain                                     | 3                     | 27        | 80                          | 17.62                      |
| P98086 | Complement C1q subcomponent subunit A                                       | 3                     | 91        | 4                           | 11.66                      |
| Q921G7 | Electron transfer flavoprotein-ubiquinone oxidoreductase, mitochondrial     | 6                     | 53        | 85                          | 10.86                      |
| P14106 | Complement C1q subcomponent subunit B                                       | 5                     | 148       | 1                           | 10.20                      |
| Q8BXV2 | BRI3-binding protein                                                        | 2                     | 42        | 13                          | 9.92                       |
| P03995 | Glial fibrillary acidic protein                                             | 22                    | 2036      | 44                          | 8.85                       |
| P13634 | Carbonic anhydrase 1                                                        | 4                     | 49        | 14                          | 8.15                       |
| P20152 | Vimentin                                                                    | 20                    | 848       | 46                          | 7.93                       |
| Q05793 | Basement membrane-specific heparan sulfate proteoglycan core protein        | 13                    | 114       | 73                          | 7.69                       |
| Q8BJI1 | Orphan sodium- and chloride-dependent neurotransmitter transporter NTT4     | 3                     | 45        | 22                          | 7.41                       |
| P14733 | Lamin-B1                                                                    | 9                     | 83        | 33                          | 6.43                       |
| Q9Z0X1 | Apoptosis-inducing factor 1, mitochondrial                                  | 7                     | 70        | 24                          | 5.34                       |
| Q62443 | Neuronal pentraxin-1                                                        | 3                     | 27        | 39                          | 5.31                       |
| Q8JZW4 | Copine-5                                                                    | 2                     | 19        | 23                          | 5.14                       |
| Q9QWI6 | SRC kinase signaling inhibitor 1                                            | 8                     | 64        | 16                          | 4.50                       |
| P21619 | Lamin-B2                                                                    | 12                    | 165       | 27                          | 3.92                       |
| Q99L04 | Dehydrogenase/reductase SDR family member 1                                 | 10                    | 272       | 34                          | 3.15                       |
| Q8CIE6 | Coatomer subunit alpha                                                      | 8                     | 59        | 71                          | 2.86                       |
| Q61838 | Alpha-2-macroglobulin                                                       | 18                    | 344       | 11                          | 2.78                       |
| O08532 | Voltage-dependent calcium channel subunit alpha-2/delta-1                   | 20                    | 387       | 39                          | 2.71                       |
| P12970 | 60S ribosomal protein L7a                                                   | 5                     | 163       | 51                          | 2.69                       |
| P56959 | RNA-binding protein FUS                                                     | 6                     | 145       | 72                          | 2.64                       |
| P14824 | Annexin A6                                                                  | 21                    | 462       | 29                          | 2.60                       |
| P63158 | High mobility group protein B1                                              | 6                     | 165       | 58                          | 2.58                       |
| Q64521 | Glycerol-3-phosphate dehydrogenase, mitochondrial                           | 27                    | 716       | 21                          | 2.54                       |
| Q8BMF4 | Dihydrolipoyllysine-residue acetyltransferase component of pyruvate dehydro | 17                    | 878       | 31                          | 2.43                       |
| P40240 | CD9 antigen                                                                 | 4                     | 255       | 59                          | 2.43                       |
| Q8CGC7 | Bifunctional aminoacyl-tRNA synthetase                                      | 13                    | 97        | 75                          | 2.28                       |
| Q8BMS1 | Trifunctional enzyme subunit alpha, mitochondrial                           | 22                    | 377       | 76                          | 2.25                       |
| P10605 | Cathepsin B                                                                 | 4                     | 98        | 65                          | 2.23                       |
| Q8R081 | Heterogeneous nuclear ribonucleoprotein L                                   | 9                     | 226       | 68                          | 2.12                       |
| P21460 | Cystatin-C                                                                  | 8                     | 276       | 51                          | 2.02                       |
| P20029 | 78 kDa glucose-regulated protein                                            | 19                    | 619       | 93                          | 2.01                       |
| P55066 | Neurocan core protein                                                       | 7                     | 251       | 70                          | 2.00                       |
| P04925 | Major prion protein                                                         | 12                    | 1569      | 86                          | 1.99                       |
| Q8BLQ9 | Cell adhesion molecule 2                                                    | 5                     | 190       | 73                          | 1.99                       |
| P28652 | Calcium/calmodulin-dependent protein kinase type II subunit beta            | 11                    | 1130      | 3                           | 1.98                       |
| P10852 | 4F2 cell-surface antigen heavy chain                                        | 9                     | 355       | 48                          | 1.95                       |
| P07724 | Serum albumin                                                               | 28                    | 2308      | 5                           | 1.91                       |
| P62631 | Elongation factor 1-alpha 2                                                 | 6                     | 491       | 45                          | 1.88                       |
| Q8BH59 | Calcium-binding mitochondrial carrier protein Aralar1                       | 24                    | 1296      | 69                          | 1.84                       |
| P26645 | Myristoylated alanine-rich C-kinase substrate                               | 6                     | 306       | 55                          | 1.83                       |
| Q8CAQ8 | Mitochondrial inner membrane protein                                        | 23                    | 703       | 63                          | 1.81                       |
| P38647 | Stress-70 protein, mitochondrial                                            | 25                    | 990       | 91                          | 1.80                       |

Top 100 ranked proteins in the non-amyloid phenotype

|        |                                                                        |    |      |     |        |
|--------|------------------------------------------------------------------------|----|------|-----|--------|
| P01942 | Hemoglobin subunit alpha                                               | 5  | 1675 | 43  | 1.78   |
| Q8VDD5 | Myosin-9                                                               | 34 | 611  | 46  | 1.75   |
| P15508 | Spectrin beta chain, erythrocyte                                       | 36 | 478  | 35  | 1.70   |
| P10126 | Elongation factor 1-alpha 1                                            | 6  | 604  | 84  | 1.66   |
| Q810U3 | Neurofascin                                                            | 20 | 964  | 42  | 1.60   |
| P35762 | CD81 antigen                                                           | 3  | 971  | 61  | 1.55   |
| P26443 | Glutamate dehydrogenase 1, mitochondrial                               | 27 | 1561 | 25  | 1.53   |
| P19096 | Fatty acid synthase                                                    | 62 | 1541 | 95  | 1.47   |
| P80318 | T-complex protein 1 subunit gamma                                      | 18 | 496  | 82  | 1.40   |
| Q9D0M3 | Cytochrome c1, heme protein, mitochondrial                             | 17 | 909  | 100 | 1.27   |
| P52480 | Pyruvate kinase isozymes M1/M2                                         | 40 | 4363 | 98  | 1.24   |
| Q9R0P9 | Ubiquitin carboxyl-terminal hydrolase isozyme L1                       | 19 | 1438 | 89  | -1.29  |
| P62761 | Visinin-like protein 1                                                 | 16 | 947  | 60  | -1.32  |
| P18760 | Cofilin-1                                                              | 10 | 1123 | 62  | -1.43  |
| P85094 | Isochorismatase domain-containing protein 2A, mitochondrial            | 5  | 296  | 78  | -1.53  |
| P17182 | Alpha-enolase                                                          | 21 | 2204 | 77  | -1.59  |
| Q9R0P5 | Dextrin                                                                | 8  | 437  | 94  | -1.60  |
| P99026 | Proteasome subunit beta type-4                                         | 10 | 346  | 78  | -1.67  |
| Q9JJV2 | Profilin-2                                                             | 7  | 557  | 55  | -1.68  |
| O08539 | Myc box-dependent-interacting protein 1                                | 9  | 429  | 38  | -1.73  |
| Q9D6R2 | Isocitrate dehydrogenase [NAD] subunit alpha, mitochondrial            | 16 | 781  | 98  | -1.78  |
| Q04447 | Creatine kinase B-type                                                 | 27 | 4448 | 16  | -1.96  |
| Q9CZU6 | Citrate synthase, mitochondrial                                        | 18 | 797  | 49  | -2.02  |
| Q9R0Y5 | Adenylate kinase isoenzyme 1                                           | 11 | 618  | 35  | -2.13  |
| Q9WV92 | Band 4.1-like protein 3                                                | 18 | 678  | 64  | -2.16  |
| Q5PR73 | GTP-binding protein Di-Ras2                                            | 7  | 188  | 88  | -2.31  |
| O55100 | Synaptogyrin-1                                                         | 2  | 70   | 90  | -2.39  |
| O35969 | Guanidinoacetate N-methyltransferase                                   | 3  | 50   | 66  | -2.46  |
| Q8JZS0 | Protein lin-7 homolog A                                                | 4  | 68   | 97  | -2.69  |
| P10637 | Microtubule-associated protein tau                                     | 4  | 92   | 82  | -2.70  |
| Q9D394 | Protein RUFY3                                                          | 7  | 79   | 41  | -2.88  |
| Q64010 | Adapter molecule crk                                                   | 4  | 74   | 96  | -3.02  |
| Q9Z204 | Heterogeneous nuclear ribonucleoproteins C1/C2                         | 5  | 160  | 57  | -3.13  |
| P62823 | Ras-related protein Rab-3C                                             | 7  | 184  | 54  | -3.28  |
| P10639 | Thioredoxin                                                            | 4  | 202  | 50  | -3.42  |
| Q61792 | LIM and SH3 domain protein 1                                           | 3  | 79   | 28  | -3.50  |
| Q9QZ23 | NFU1 iron-sulfur cluster scaffold homolog, mitochondrial               | 3  | 71   | 67  | -3.52  |
| Q9DCS2 | UPF0585 protein C16orf13 homolog                                       | 3  | 50   | 30  | -3.89  |
| Q9Z329 | Inositol 1,4,5-trisphosphate receptor type 2                           | 2  | 49   | 10  | -5.35  |
| P46664 | Adenylosuccinate synthetase isozyme 2                                  | 4  | 45   | 15  | -5.40  |
| O88545 | COP9 signalosome complex subunit 6                                     | 3  | 27   | 37  | -5.94  |
| P56380 | Bis(5'-nucleosyl)-tetrakisphatase [asymmetrical]                       | 5  | 93   | 51  | -6.14  |
| Q9WVC2 | Ly-6/neurotoxin-like protein 1                                         | 3  | 32   | 6   | -6.26  |
| Q8BJU0 | Small glutamine-rich tetratricopeptide repeat-containing protein alpha | 5  | 50   | 9   | -6.34  |
| Q9CY64 | Biliverdin reductase A                                                 | 4  | 60   | 31  | -6.37  |
| Q9DCB8 | Iron-sulfur cluster assembly 2 homolog, mitochondrial                  | 7  | 65   | 7   | -6.76  |
| Q9QZX7 | Serine racemase                                                        | 4  | 63   | 19  | -8.73  |
| P17809 | Solute carrier family 2, facilitated glucose transporter member 1      | 2  | 42   | 26  | -9.47  |
| Q99KP3 | Lambda-crystallin homolog                                              | 3  | 23   | 12  | -10.29 |
| Q99LS3 | Phosphoserine phosphatase                                              | 2  | 22   | 20  | -12.62 |
| Q9ERK4 | Exportin-2                                                             | 5  | 35   | 18  | -15.74 |
